# Supplementary material for: Feasibility of a prehabilitation programme dedicated to older patients with cancer before complex medical–surgical procedures: the PROADAPT pilot study protocol
Source: PubMed Central journal article supplement — BMJ Open. 2021 Apr 2;11(4):e042960. doi: 10.1136/bmjopen-2020-042960 (PMC8023742; doi:10.1136/bmjopen-2020-042960), 2021-04-02
Supplement: bmjopen-2020-042960.draft_revisions.pdf [file bmjopen-2020-042960.draft_revisions.pdf]

# BMJ Open

BMJ Open is committed to open peer review. As part of this commitment we make the peer review history of every article we publish publicly available.

When an article is published we post the peer reviewers' comments and the authors' responses online. We also post the versions of the paper that were used during peer review. These are the versions that the peer review comments apply to.

The versions of the paper that follow are the versions that were submitted during the peer review process. They are not the versions of record or the final published versions. They should not be cited or distributed as the published version of this manuscript.

BMJ Open is an open access journal and the full, final, typeset and author-corrected version of record of the manuscript is available on our site with no access controls, subscription charges or pay-per-view fees (<http://bmjopen.bmj.com>).

If you have any questions on BMJ Open's open peer review process please email [info.bmjopen@bmj.com](mailto:info.bmjopen@bmj.com)

# BMJ Open

## Feasibility of a prehabilitation program dedicated to older cancer patients before complex medico-surgical procedures: the PROADAPT pilot study protocol

|                               |                                                                                                                                                                                                                                                                                                                                                                                                                                                                                                                                                                                                                                                                                                                                                                                                                                                                                                                                                                                                                                                                                                                                                                                                                                                                                                                                                                                                                                                                                                                                                                                                                                                                                                                                                                                                                                                                                                                                                                                                                                      |
|-------------------------------|--------------------------------------------------------------------------------------------------------------------------------------------------------------------------------------------------------------------------------------------------------------------------------------------------------------------------------------------------------------------------------------------------------------------------------------------------------------------------------------------------------------------------------------------------------------------------------------------------------------------------------------------------------------------------------------------------------------------------------------------------------------------------------------------------------------------------------------------------------------------------------------------------------------------------------------------------------------------------------------------------------------------------------------------------------------------------------------------------------------------------------------------------------------------------------------------------------------------------------------------------------------------------------------------------------------------------------------------------------------------------------------------------------------------------------------------------------------------------------------------------------------------------------------------------------------------------------------------------------------------------------------------------------------------------------------------------------------------------------------------------------------------------------------------------------------------------------------------------------------------------------------------------------------------------------------------------------------------------------------------------------------------------------------|
| Journal:                      | <i>BMJ Open</i>                                                                                                                                                                                                                                                                                                                                                                                                                                                                                                                                                                                                                                                                                                                                                                                                                                                                                                                                                                                                                                                                                                                                                                                                                                                                                                                                                                                                                                                                                                                                                                                                                                                                                                                                                                                                                                                                                                                                                                                                                      |
| Manuscript ID                 | bmjopen-2020-042960                                                                                                                                                                                                                                                                                                                                                                                                                                                                                                                                                                                                                                                                                                                                                                                                                                                                                                                                                                                                                                                                                                                                                                                                                                                                                                                                                                                                                                                                                                                                                                                                                                                                                                                                                                                                                                                                                                                                                                                                                  |
| Article Type:                 | Protocol                                                                                                                                                                                                                                                                                                                                                                                                                                                                                                                                                                                                                                                                                                                                                                                                                                                                                                                                                                                                                                                                                                                                                                                                                                                                                                                                                                                                                                                                                                                                                                                                                                                                                                                                                                                                                                                                                                                                                                                                                             |
| Date Submitted by the Author: | 22-Jul-2020                                                                                                                                                                                                                                                                                                                                                                                                                                                                                                                                                                                                                                                                                                                                                                                                                                                                                                                                                                                                                                                                                                                                                                                                                                                                                                                                                                                                                                                                                                                                                                                                                                                                                                                                                                                                                                                                                                                                                                                                                          |
| Complete List of Authors:     | <p>Roche, Mélanie; Hospices Civils de Lyon, Plateforme Transversale de Recherche de l'ICHCL</p> <p>Ravot, Christine; Hospices Civils de Lyon, Geriatrics unit. Centre Hospitalier Lyon Sud</p> <p>Malapert, Amélie; Hospices Civils de Lyon, Plateforme Transversale de Recherche de l'ICHCL</p> <p>Garandeau, Charlène; Hospices Civils de Lyon, Direction à la Recherche Clinique et à l'Innovation</p> <p>Pitiot, Virginie; Hospices Civils de Lyon, Plateforme Transversale de Recherche de l'ICHCL</p> <p>Tomatis, Mélanie; Hospices Civils de Lyon, Geriatrics unit. Centre Hospitalier Lyon Sud</p> <p>Riche, Benjamin; Hospices Civils de Lyon, Service de Biostatistique - Bioinformatique, Pôle Santé Publique; Université de Lyon, Laboratoire de Biométrie et Biologie Évolutive CNRS UMR 5558, Équipe Biostatistiques Santé</p> <p>Galamand, Béatrice; Hospices Civils de Lyon, Geriatrics unit. Centre Hospitalier Lyon Sud</p> <p>Granger, Marion; Hospices Civils de Lyon, Geriatrics unit; Centre Hospitalier de Chambéry</p> <p>Barbavara, Claire; Hospices Civils de Lyon, Geriatrics unit - Centre Hospitalier Lyon Sud</p> <p>Bourgeois, Chrystelle; Centre Hospitalier Annecy Genevois, Medical Oncology</p> <p>Genest, Evelyne; Hospices Civils de Lyon, Geriatrics unit</p> <p>Stefani, Laetitia; Centre Hospitalier Annecy Genevois, Medical oncology</p> <p>Haïne, Max; L'Hôpital Nord Ouest, Pôle de gérontologie et Médecine de Réadaptation</p> <p>Castel-Kremer, Elisabeth; Hospices Civils de Lyon, Geriatrics unit. Hôpital Edouard Herriot.</p> <p>Morel-Soldner, Isabelle; Hospices Civils de Lyon, Geriatrics unit. Centre Hospitalier de la Croix Rousse</p> <p>Collange, Vincent; Medipole Lyon-Villeurbanne, Département anesthésie réanimation</p> <p>Le Saux, Olivia; Centre de Recherche en Cancérologie de Lyon, Therapeutic targeting of the tumor cell and its immune microenvironment</p> <p>Dayde, David; Hospices Civils de Lyon, Plateforme Transversale de Recherche de l'ICHCL</p> |

1  
2  
3  
4  
5  
6  
7  
8  
9  
10  
11  
12  
13  
14  
15  
16  
17  
18  
19  
20  
21  
22  
23  
24  
25  
26  
27  
28  
29  
30  
31  
32  
33  
34  
35  
36  
37  
38  
39  
40  
41  
42  
43  
44  
45  
46  
47  
48  
49  
50  
51  
52  
53  
54  
55  
56  
57  
58  
59  
60

|           |                                                                                                                                                                                                          |
|-----------|----------------------------------------------------------------------------------------------------------------------------------------------------------------------------------------------------------|
|           | Falandry, Claire; Hospices Civils de Lyon, Geriatrics unit; University of Lyon, CarMeN Laboratory, Inserm U1060, INRA U1397, Université Claude Bernard Lyon 1, INSA Lyon, Charles Mérieux Medical School |
| Keywords: | Adult oncology < ONCOLOGY, GERIATRIC MEDICINE, REHABILITATION MEDICINE, Adult surgery < SURGERY                                                                                                          |
|           |                                                                                                                                                                                                          |

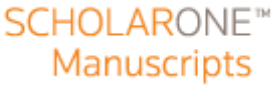

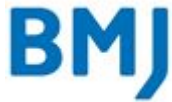

I, the Submitting Author has the right to grant and does grant on behalf of all authors of the Work (as defined in the below author licence), an exclusive licence and/or a non-exclusive licence for contributions from authors who are: i) UK Crown employees; ii) where BMJ has agreed a CC-BY licence shall apply, and/or iii) in accordance with the terms applicable for US Federal Government officers or employees acting as part of their official duties; on a worldwide, perpetual, irrevocable, royalty-free basis to BMJ Publishing Group Ltd ("BMJ") its licensees and where the relevant Journal is co-owned by BMJ to the co-owners of the Journal, to publish the Work in this journal and any other BMJ products and to exploit all rights, as set out in our [licence](#).

The Submitting Author accepts and understands that any supply made under these terms is made by BMJ to the Submitting Author unless you are acting as an employee on behalf of your employer or a postgraduate student of an affiliated institution which is paying any applicable article publishing charge ("APC") for Open Access articles. Where the Submitting Author wishes to make the Work available on an Open Access basis (and intends to pay the relevant APC), the terms of reuse of such Open Access shall be governed by a Creative Commons licence – details of these licences and which [Creative Commons](#) licence will apply to this Work are set out in our licence referred to above.

Other than as permitted in any relevant BMJ Author's Self Archiving Policies, I confirm this Work has not been accepted for publication elsewhere, is not being considered for publication elsewhere and does not duplicate material already published. I confirm all authors consent to publication of this Work and authorise the granting of this licence.

1  
2  
3  
4 1 **Feasibility of a prehabilitation program dedicated to older cancer**  
5  
6 2 **patients before complex medico-surgical procedures: the PROADAPT**  
7  
8 3 **pilot study protocol**  
9

10  
11 4 Roche Mélanie (melanie.roche@chu-lyon.fr)  
12

13 5 Ravot Christine (christine.ravot@chu-lyon.fr)  
14

15 6 Malapert Amélie (amelie.malapert@chu-lyon.fr)  
16

17 7 Charlène Garandea (charlene.garandea@chu-lyon.fr)  
18

19 8 Pitiot Virginie (virginie.pitiot@chu-lyon.fr)  
20

21 9 Tomatis Mélanie (melanie.tomatis@chu-lyon.fr)  
22

23 10 Benjamin Riche (benjamin.riche@chu-lyon.fr)  
24

25 11 Béatrice Galamand (beatrice.galamand@chu-lyon.fr)  
26

27 12 Marion Granger (mariongranger@outlook.fr)  
28

29 13 Claire Barbarava (claire.barbarava@gmail.com)  
30

31 14 Chrystelle Bourgeois (cbourgeois@ch-annecygenevois.fr)  
32

33 15 Evelyne Genest (evelyne.genest@chu-lyon.fr)  
34

35 16 Laetitia Stefani (lstefani@ch-annecygenevois.fr)  
36

37 17 Max Haïne (mhaine@lhospitalnordouest.fr)  
38

39 18 Elisabeth Castel Kremer (Elisabeth.castel-kremer@chu-lyon.fr)  
40

41 19 Isabelle Morel-Soldner (isabelle.morel-soldner@chu-lyon.fr)  
42

43 20 Vincent Collange (collangev@gmail.com)  
44

45 21 Olivia Le Saux (Olivia.LESAUX@lyon.unicancer.fr)  
46

47 22 David Dayde (david.dayde@chu-lyon.fr)  
48

49 23 Claire Falandry ([claire.falandry@chu-lyon.fr](mailto:claire.falandry@chu-lyon.fr)) (Corresponding author)  
50

51 24 Corresponding email address: [claire.falandry@chu-lyon.fr](mailto:claire.falandry@chu-lyon.fr)  
52  
53  
54  
55  
56  
57  
58  
59  
60

## 25 **Abstract**

26 **Background:** Aging is associated with an increased prevalence of co-morbidities and sarcopenia and  
27 with a decline of functional reserve of multiple organ systems, eventually leading in the context of the  
28 disease- and/or treatment-related stress to functional deconditioning or organ failure. The  
29 multicomponent intervention “PROADAPT” was built multi-professionally to implement  
30 prehabilitation in older cancer patients.

31 **Methods:** PROADAPT-pilot study is an interventional, non-comparative, prospective, multicenter  
32 study. It will include 122 patients oriented to complex medico-surgical curative procedures (major  
33 surgery or radiation therapy +/- chemotherapy). After informed consent, patients will undergo a  
34 comprehensive geriatric assessment and will be offered a prehabilitation kit “PROADAPT” including an  
35 advices booklet with personalized objectives and respiratory rehabilitation devices. Patients will then  
36 be called weekly and monitored for physical and respiratory rehabilitation, pre-operative re-nutrition,  
37 motivational counseling, and iatrogenic prevention. Six outpatient consultations will be planned at  
38 inclusion, few days before the procedure, at 1, 3, 6 and 12 months after the end of the procedure. The  
39 main outcome of the study is the feasibility of the intervention, defined as the ability to perform at  
40 least one of the components of the program. Clinical data collection will include patient-specific and  
41 cancer-specific characteristics.

42 **Discussion:** PROADAPT program was designed to be implemented pragmatically in the centers  
43 according local habits and in different tumor contexts. Based on the results of this feasibility study,  
44 two randomized study are planned, that will evaluate the impact of PROADAPT program after cancer  
45 treatment for ovarian cancer (NCT04284969) or susmesocolic cancers.

46 **Ethics and dissemination:** Study protocol and several amendments were ethically approved. The  
47 results of the primary and secondary objectives will be published in peer-reviewed journals.  
48 ClinicalTrials registration: NCT03659123.

49 **Keywords:** oncogeriatrics, prehabilitation, motivation, sarcopenia, older cancer patients, care  
50 pathway.

## 52 **Article summary**

53 Strengths and limitations of this study

- 54 - PROADAPT program is a prehabilitation program specifically tailored for older cancer patients
- 55 - The program was designed according a multidisciplinary analysis of available evidence and  
56 according a multistep validation process involving patients.

1  
2  
3  
4  
5  
6  
7  
8  
9  
10  
11  
12  
13  
14  
15  
16  
17  
18  
19  
20  
21  
22  
23  
24  
25  
26  
27  
28  
29  
30  
31  
32  
33  
34  
35  
36  
37  
38  
39  
40  
41  
42  
43  
44  
45  
46  
47  
48  
49  
50  
51  
52  
53  
54  
55  
56  
57  
58  
59  
60

- 57 - PROADAPT pilot trial is a prospective and multicenter trial designed to evaluate the feasibility
- 58 of the intervention, next leading to future 2 randomised trials
- 59 - The construct of the trial includes lots of secondary outcomes, to better adapt the program to
- 60 patients' specificities

61

62

For peer review only

## 63 Introduction

64 Many oncological situations involve complex medical-surgical procedures at risk of patient's  
65 deconditioning. Surgery or complex medico-surgical procedures can be considered as one proof-of  
66 principle of such risks, since major cancer surgery exposes the older population to a higher risk of  
67 morbi-mortality and unplanned hospitalization for geriatric events (1). Outpatient treatments and  
68 rapid post-operative rehabilitation strategies are used to decrease post-operative deconditioning but  
69 do not take geriatric risk factors into account. The deconditioning of older patients, not anticipated,  
70 can thus lead to prolonged and iatrogenic hospitalizations, generating frustration, appeals by patients  
71 and their families and additional hospital costs.

72 In order to reduce complications after surgery, prehabilitation has often been considered, and 71 % of  
73 the surgeons would accept a 4 weeks delay before surgery to improve older patients' outcomes if  
74 shown to be beneficial (2). However, the actual level of evidence depends on the interventions: high  
75 for pre-operative nutrition (3), but low for physical exercise, due to heterogeneous programs with  
76 often bad adherence (4). In addition, geriatric validated interventions, in order to prevent iatrogenic  
77 event, may be added in a multi-interventional model of intervention.

78 To date, the interventions likely to prevent geriatric deconditioning include nutritional care, pre-  
79 therapeutic (prehabilitation) and post-therapeutic (rehabilitation) physical reconditioning, iatrogenic  
80 prevention (drug and care system-related) and hospital-to-home transition to limit the risk of early  
81 readmission of patients. Nevertheless, the level of evidence for each of these care segments remains  
82 limited, and not specific to the oncogeriatric population. Indeed, studies about more specific care have  
83 already been carried out but do not consider all of the above interventions (5). Moreover, cancer in  
84 the older patient is often associated with comorbidities, particularly cardiovascular disease (6,7). The  
85 older population also has a higher risk of loss of autonomy and cognitive impairment, which can be  
86 increased with surgery (8–10). In response to the growing population of older cancer patients, a  
87 modification of oncological care and the implementation of specific geriatric interventions have been  
88 developed (11–13).

89 PROADAPT (Prehabilitation & Rehabilitation in Oncogeriatrics: Adaptation to Deconditioning risk and  
90 Accompaniment of Patients' Trajectories) is a geriatric intervention program constructed on a multi-  
91 professional and multi-disciplinary basis after a systematic analysis of published data. It includes: 1)  
92 before surgery: prehabilitation of patients, including nutritional, physical, respiratory and motivational  
93 counselling; 2) during hospitalisation for surgery (if performed): optimization of their treatment by  
94 pharmaceutical reconciliation, educational interventions, standardization of surgical interventions and  
95 improved rehabilitation after surgery; 3) bridging and post-discharge interventions for hospital-to-  
96 home transition (table 1).



1  
2  
3 974  
5 98 **Methods and analysis**6  
7 99 **Objectives**8  
9  
10 100 *Primary objective*

11  
12 101 The primary objective of the PROADAPT pilot study is to assess the feasibility of the program, defined  
13  
14 102 as the achievement of at least one item of the program during patient's follow up.

15 103

16  
17 104 *Secondary objectives*

18  
19 105 The secondary objectives of the study are:

- 20  
21  
22 106 1) To assess the achievement of each item of the program independently of each other (rate of  
23  
24 107 achievement of all or part of the instructions);  
25 108 2) To assess patients' satisfaction with the program;  
26  
27 109 3) To estimate the rate of adherence to items during the various visits;  
28  
29 110 4) To appreciate the longitudinal evolution over 1 year.

30  
31 111 In addition to these secondary objectives, a series of parameters will be measured and monitored  
32  
33 112 in this order:

- 34  
35 113 5) To assess patients' post treatment complications according Clavien Dindo and NCI-CTC version  
36  
37 114 4 scoring systems;  
38 115 6) To estimate the rate and the nature of post-operative complications according to the CCI index  
39  
40 116 at 30 and 90 days;  
41  
42 117 7) To estimate the post-operative mortality at 30 and 90 days;  
43  
44 118 8) To estimate the costs of treatments (health system, patients);  
45 119 9) To study the therapeutic strategies (treatment completion rate);  
46  
47 120 10) To estimate the progression-free survival rate at one year (PFS);  
48  
49 121 11) To estimate the overall survival rate at one year (OS);  
50 122 12) To study the physical performance tests and the evolution of these performances through the  
51  
52 123 proposed exercises;  
53  
54 124 13) To study the other dimensions of quality of life relating to health at 3 months;  
55 125 14) To estimate the longitudinal evolution of QoL;  
56  
57 126 15) To estimate the tolerance of treatments;  
58  
59 127 16) To estimate the evolution of geriatric covariates.  
60

1  
2  
3 128 **Study design**  
4

5 129 PROADAPT - pilot phase is a second category interventional study involving the human person with  
6  
7 130 minimal risks and constraints excluding health products. It is a prospective, non-comparative  
8  
9 131 multicenter opened in different centers of Auvergne-Rhône-Alpes region, France (n=7).

10  
11 132 **Study sites and participants**  
12

13 133 The study population will include older patients identified during multidisciplinary consultation  
14  
15 134 meetings and oriented to complex medico-surgical curative procedures in the including centers (Lyon  
16  
17 135 Sud Hospital, Croix Rouse Hospital and Edouard Herriot Hospital from the Hospices Civils de Lyon,  
18  
19 136 Nord-Ouest Villefranche-sur-Saône Hospital, Annecy-Genevois Hospital, Chambéry Hospital, Lyon-  
20  
21 137 Villeurbanne Médipôle).

22 138 Inclusion criteria are: patient aged 70 and over or 60 and over with significant comorbid condition  
23  
24 139 (modified Charlson index  $\geq 3$ ) or disability (ADL score  $< 6/6$ ), histologically or cytologically proven  
25  
26 140 cancer, life expectancy  $> 3$  months planned for a complex medico-surgical procedure in a curative  
27  
28 141 intent.

29 142 Exclusion criteria are: patient with other malignancy within the last 5 years (except for adequately  
30  
31 143 treated carcinoma in situ of the cervix or squamous carcinoma of the skin, or adequately controlled  
32  
33 144 limited basal cell skin cancer), unable to be regularly followed for any reason (geographic, familial,  
34  
35 145 social, psychologic) or with any mental or physical handicap at risk of interfering with the appropriate  
36  
37 146 treatment.  
38

39 147  
40 148 **Intervention**  
41

42 149 PROADAPT intervention program was built according to a multi-dimensional and multidisciplinary  
43  
44 150 basis. From January 2016 to April 2018, nine regional meetings were organized, gathering 40  
45  
46 151 representatives of the following medical and paramedical specialties: geriatricians, nutritionists,  
47  
48 152 surgeons (subspecialties: gynaecology, digestive surgery, urology), oncologists, anaesthesiologists,  
49  
50 153 nurses, physiotherapists, occupational therapists, adapted physical activity monitors. A systematic  
51  
52 154 review of published data was done in the following axes, in order to provide a graded state-of-the-art:  
53  
54 155 nutrition, physical activity, patient education, medication rationalization, cardiovascular optimization,  
55  
56 156 transition and standardization of surgical procedures. Based on the qualitative grading of existing data,  
57  
58 157 a modified DELPHI method was performed, in order to co-validate the content of the standardized  
59  
60 158 intervention checklist, and the feasibility of the implementation of each point of this checklist (Table  
159  
160 1).

1  
2  
3 160 A PROADAPT booklet was built, in order to propose a standardized, adapted and evolutive tool  
4  
5 161 designed to explain physical exercise and nutrition counselling and to insure a follow-up of patients'  
6  
7 162 day-to-day achievements. This first version was tested by candidate patients during two turns of  
8  
9 163 validation before the validation of the current version 3 of the booklet.

10 164 *PROADAPT standardized geriatric intervention program includes:*

- 11  
12  
13 165 - Pre-operative physical activity including strength and endurance exercise +/- group activities  
14  
15 166 during 4 +/-2 weeks. Interventions with high level of evidence were retained, according to an ongoing  
16  
17 167 systematic analysis (<http://www.crd.york.ac.uk/PROSPERO> Ref CRD42020100110; (14,15));  
18  
19 168 - Nutrition: nutrition before and after physical activity, pre-postoperative immuno-nutrition +/-  
20  
21 169 artificial nutrition according international guidelines (3);  
22  
23 170 - Patient (and caregiver) education and coaching (on nutrition, physical exercise) according to a  
24  
25 171 weekly schedule with the activation of integrated supports by hetero- and self-management (16);  
26  
27 172 - Standardized intervention procedures, according to a checklist established in consensus with  
28  
29 173 surgeons' representatives;  
30  
31 174 - Enhanced rehabilitation will be promoted according to international guidelines (17);  
32  
33 175 - Pharmaceutical medication conciliation, treatment optimization, according a centralized  
34  
35 176 process with pharmaceutical expertise;  
36  
37 177 - Bridging interventions for hospital-to-home transition, according to a proposed standardized  
38  
39 178 procedure including training of dedicated nurses, and post-discharge phone-calls follow-up during 12  
40  
41 179 weeks after surgery. Interventions with high level of evidence were retained, according to an ongoing  
42  
43 180 systematic analysis (<http://www.crd.york.ac.uk/PROSPERO> Ref CRD42017055698).

44 181 The intervention is designed to be implemented at different times of patients' care (table 1).

45 182

46 183 *During the prehabilitation time:*

- 47 184 • A dedicated nurse, trained in patient education ("coaching nurse") presents him/herself to the  
48  
49 185 patient for:  
50  
51 186 - Presentation of the program to the patient and his/her caregiver(s)  
52  
53 187 - Personalization of the PROADAPT book (see after) to the patient's characteristics  
54  
55 188 - Collection of personal data, nutritional and functional habits  
56  
57 189 - Evaluation of psycho-cognitive context  
58  
59 190 - Gathering of the information needed: comorbidities, comedications (for transmission  
60  
191 to the centralized pharmaceutical expertise)  
192  
193 - Anticipation and organization of the future appointments (anesthesiologist,  
stomatherapist, ...)

- 1  
2  
3 194 - A weekly visit or phone call according to a structured interview for health education  
4 and transmission of nutritional and functional advices (see after)  
5 195  
6 196 • Nutritional care is based on:  
7  
8 197 - A personalized evaluation of nutritional balance and nutritional needs of the patient  
9 according to dietician diagnosis based on measured intake and international  
10 198 recommendations  
11 199  
12  
13 200 - A weekly follow-up of weight and nutritional intake  
14  
15 201 - Artificial nutrition if needed according ESPEN recommendations (3)  
16  
17 202 - Pre-operative immune-nutrition during 7 days before surgery  
18  
19 203 • Total-body rehabilitation:  
20 204 - 2 to 3 times a week: strength exercise (each time with dedicated exercises for upper  
21 members, legs and abs, 20 to 45 minutes each sequence)  
22 205  
23 206 - 2 to 3 times a week: endurance exercise (walk or cycle ergometer), 20 to 45 min each  
24 sequence  
25 207  
26 208 - 3 times a day: respiratory physiotherapy  
27  
28 209 - Once a week (if possible): group activities (according to the center organization and  
29 home-hospital distance)  
30 210  
31 211 • Pharmaceutical conciliation and optimization according to STOPP/START criteria and  
32 international recommendations about peri-operative care (18): to be transmitted to the surgical and  
33 anesthesia team without any obligation.  
34  
35 213  
36  
37 214

38 215 *During peri-operative time*

- 40 216 • The coaching nurse contacts the surgical team for transmission of:  
41  
42 217 o patient's personal data  
43 218 o physical (nutritional, functional and/or comorbidities) as well as psychological  
44 219 difficulties  
45  
46 220 o medication conciliation results  
47  
48 221

50 222 *During rehabilitation time*

- 51 223 • The coaching nurse contacts the rehabilitation team for transmission of:  
52  
53 224 o patient's personal data and care course  
54 225 o physical (nutritional, functional and/or comorbidities) as well as psychological  
55 226 difficulties  
56  
57 227 o medication conciliation results  
58  
59 228 • The rehabilitation program is left at the discretion of the rehabilitation team  
60

- 1  
2  
3 229 • A weekly phone call of the coaching nurse to the rehabilitation team for nutritional and  
4 functional follow-up as well as medication conciliation  
5 230

6 231

8 232 *During hospital-home transition time*

- 9  
10 233 • The coaching nurse contacts the patient's general practitioner for transmission of:  
11 234 o patient's personal data and care course  
12 235 o physical (nutritional, functional and/or comorbidities) as well as psychological  
13 236 difficulties  
14 237 o medication conciliation results  
15  
16 238 • Bi-weekly phone call of the coaching nurse to the patient for nutritional and functional follow-  
17  
18 239 up  
19  
20 240 • Advices for optimization of symptoms management: abdominal pain, nausea, vomiting...  
21  
22 241

23  
24  
25 242 **Participant timeline**

26  
27  
28 243 Six successive evaluations are planned for the participants.

29  
30 244 *The inclusion visit* is planned during a geriatric consultation planned before the start day of the complex  
31  
32 245 medico-surgical procedure, at least 7 days before start date. If the start date is delayed for any reason  
33  
34 246 or the patient is included into a neo-adjuvant treatment, the prehabilitation time may be prolonged  
35  
36 247 until 9 months. In that case, the frequency of the phone calls is decreased (from 1/week to 1/month)  
37  
38 248 after 4 weeks. During the inclusion visit, lasting about 1 hour, the following steps are planned:

- 39 249 - Clinic (blood pressure, heart rate, WHO score, patient's comorbidities), biologic (albumin,  
40 prealbumin, C-reactive protein) and paraclinic (year of birth, gender, weight, height, body  
41 250 mass index, weight evolution over the last 3 and 6 months) data collection  
42  
43 251 - All concomitant treatments and drug conciliation  
44  
45 252 - The history of the disease (primitive site, metastasis, histology of the initial tumor, presence  
46 253 of tumor markers)  
47  
48 254 - Radiological disease assessments (date and nature)  
49  
50 255 - A standardized geriatric assessment using validated questionnaires with a particular attention  
51 256 on physical activity and nutrition (**Error! Reference source not found.** tables 2 and 3).  
52  
53 257 - Delivery of the "PROADAPT kit" device during a meeting with a dedicated paramedic (nurse,  
54 258 physiotherapist, ergotherapist...) in order to:  
55  
56 259 o Provide to the patient VOLDYNE® and TRIFLO® devices for inspiratory training  
57  
58 260

- 1  
2  
3 261           ○ Present the PROADAPT notebook that includes a battery of exercises and nutritional  
4  
5 262           counselling specifically designed for this older population:  
6  
7 263           ▪ muscle strengthening of upper limbs (6 exercises, 3 difficulty levels), lower  
8 264           limbs (6 exercises, 3 difficulty levels), abdominal wall (4 exercises, 3 difficulty  
9  
10 265           levels) (objective: 2 to 3 sessions per day for a total time between 20 and 45  
11 266           minutes)  
12  
13 267           ▪ endurance/aerobic activities (7 exercises, 3 difficulty levels with 3 duration  
14 268           objectives, objective: every day)  
15  
16 269           ▪ inspiratory training with VOLDYNE® and TRIFLO® devices (objective: 3 sessions  
17 270           per day for a total time of 30 minutes)  
18  
19 271           ▪ general nutritional counselling adapted to the older population: food  
20 272           enrichment, inter-meals collations, oral nutritional supplements.  
21  
22 273           ○ A fulfilling of 3-day food statement allows, in the 7 days after inclusion, to deliver a  
23 274           dietician-driven personalized nutritional counseling. If needed, in case of unfavorable  
24 275           nutritional parameters, artificial nutrition is introduced.  
25  
26  
27 276           - Delivery, if needed, of medical prescription:  
28  
29 277           ○ for home physiotherapy according PROADAPT program for respiratory training  
30 278           sessions and physical activity training sessions  
31  
32 279           ○ For oral nutritional supplements  
33  
34 280           ○ For usual medicines, including pharmaceutical review  
35  
36 281           - For patients requiring inpatient follow-up, hospital admission for a few days in a rehabilitation  
37 282           unit for a physiotherapeutic program and/or artificial nutrition (enteral preferred).  
38  
39  
40  
41 283           During pre-intervention time, phone calls are planned by a dedicated paramedic (once a week for the  
42 284           first 4 weeks and then once a month until the intervention). Calls are semi-directed interviews focused  
43 285           on the patient's autonomy, physical activity, appetite and sleep over the last period (week/month). A  
44 286           special attention is paid on encouraging patient's motivation and adherence to the program (figure 1)  
45  
46  
47 287           *The pre-therapeutic visit* is scheduled when possible between 5 days and the day of the intervention.  
48  
49 288           This visit is performed in the surgery or radiotherapy unit only if the visit is necessary before the  
50 289           intervention still without modifying the standard therapeutic care for:  
51  
52  
53 290           - Clinic, biologic and paraclinic data collection  
54  
55 291           - All concomitant treatments and drug conciliation  
56  
57 292           - Questionnaires about pain, nutrition, fitness and physical tests (table 2 and 3)  
58  
59 293           - Therapeutic care data collection (date, nature, entitled, reason)  
60

294 During post-intervention time, paramedics trained in clinical research will resume follow-up calls as  
295 before the intervention once a week during 12 weeks after D0 and once a month up to 12 months after  
296 D0. The D0 date is determined as the last day of surgery (day of the last resumption of surgery in the  
297 limit of 30 days after the first intervention) or the last day of the radiotherapy. For weekly calls, a  
298 margin of +/- 2 days is allowed and for monthly calls, a margin of +/- 7 days is allowed.

299 *Visits at 1, 3 and 6 months after the intervention (+/- 7 days):* The patient may have started an  
300 antineoplastic treatment according to standard of care. The visit could be performed with the surgeon,  
301 the radiotherapist or the oncologist according local habits:

- 302 - Clinic (blood pressure, heart rate, WHO score), biologic (albumin, prealbumin, C-reactive  
303 protein) and paraclinic (weight, body mass index) data collection
- 304 - All concomitant treatments and drug conciliation
- 305 - Patient care data (surgery and complications, treatment for the cancer)
- 306 - Radiological disease assessments (date and nature)
- 307 - Questionnaires about quality of life, pain, nutrition, fitness and physical tests (table 2 and 3)
- 308 - Socio-economic assessment with patient's care data (date, nature of acts, designation, reason)

309 *The end of study visit* is planned at 12 months (per-protocol) or at the date of trial premature  
310 discontinuation (+/- 7 days) for a final assessment of the same outcomes as previously listed. When  
311 requested, if previous visits were omitted, a final assessment of all the complications during the post-  
312 therapeutic period is performed.

## 313 **Outcomes and measurements**

### 314 ***Primary outcome***

315 The main outcome measure will be the percentage of patients who have completed at least one item  
316 in the PROADAPT program after 12 months after the start of therapeutic treatment. The start of  
317 treatment is defined in this study by the last day of surgery (date of the last recovery within the limit  
318 of 30 days after the date of the initial intervention) or the last day of radiotherapy. The workshops of  
319 the program are:

- 320 - Physical and respiratory rehabilitation
- 321 - Re-nutrition session
- 322 - Telephone nurse follow-up

323

324

### 325 ***Secondary outcomes***

1  
2  
3 326 The secondary outcomes of the study are:  
4

5 327 - To evaluate the feasibility of each stage of the program independently of each other (rate of  
6 achievement of all or part of the instructions)  
7 328

8  
9 329 ○ Pre-operative physical rehabilitation including (figure 2):

10 330 ● Muscle strengthening

11 331 ● Respiratory rehabilitation

12 332 ● Endurance work

13  
14 333 ○ Pre-operative nutrition counselling (figure 2)

15 334 ○ Drug reconciliation / iatrogenic prevention

16 335 ○ Pre-therapeutic follow-up calls (figure 1)

17 336 ○ Post-surgery or post-radiotherapy follow-up calls (figure 1)  
18  
19  
20  
21  
22 337

23  
24 338 - To estimate patients' satisfaction with the overall program, at the end of the study (**Error! Reference**  
25 **source not found.**table 2).  
26 339

27  
28 340 - To estimate the rate of adherence to the items (physical activity, nutrition and nursing follow-up)  
29 during follow-up time. To evaluate this criterion, various parameters will be recorded: physical activity  
30 341 duration (in h/week), kinetics (duration (% increase), level of difficulty), respiratory activity, food intake  
31 342 during phone calls.  
32 343

33  
34  
35 344 - To assess the longitudinal evolution over 1 year of:

36 345 ○ patient's physical performance (SPPB, gate speed, TUG test) and functional independence on  
37 ADL (19), IADL (20), AIPVQ (21)  
38 346

39 347 ○ nutritional parameters of the patient (weight, albuminemia, appetite)

40 348 ○ health-related quality of life for patients based on QLQ-C30 and ELD14 (5 dimensions: mobility,  
41 disease burden, emotional and physical functioning, tiredness) (22,23)  
42 349

43 350 ○ pharmaceutical conciliation  
44  
45  
46 351

47  
48  
49 352 In parallel to these secondary objectives, a series of parameters will be measured and monitored in  
50 order to:  
51 353

52 354 - Estimate the rate and nature of post-operative complications at 30 days (NCI-CTCAE)

53 355 - Estimate the rate and nature of post-operative complications according to the CCI at 30 and 90 days

54 356 - Estimate post-operative mortality at 30 and 90 days

55 357 - Estimate the overall one-year survival rate (OS)

56 358 - Estimate the one-year progression-free survival rate (PFS)  
57  
58  
59  
60



1  
2  
3 359 - Estimate the longitudinal evolution of QoL according to QLQ C30, ELD14, EQ-5D

4  
5 360 - Estimate treatment costs (health system, patients)

6  
7 361 - Study therapeutic strategies (treatment completion rate)

8  
9 362 - Estimate the evolution of geriatric covariates.

10 363

11  
12 364 **Sample size calculation**

13  
14 365 The program will be considered feasible, at the patient level, if all or part of the program is  
15 366 implemented in at least 50 % of the included patients (= alternative hypothesis).

16  
17  
18 367 The calculation of the number of subjects needed was done as follows: to reject the null hypothesis of  
19 368 the program feasibility rate lower than 35 %, with a first alpha species risk of 5 % and a power of 90 %  
20 369 (beta=10 %, bilateral test), the number of subjects to be analyzed is 111. Including 10 % non-treatable  
21  
22 370 patients, a total of 122 patients should be included. The included patients will be analyzed with  
23  
24 371 intention-to-treat.

25  
26  
27 372 **Data management and statistical analyses**

28  
29  
30 373 Data are monitored by a clinical research associate (CRA). Inconsistencies will be reported to the study  
31 374 investigators in order to decide whether the data should be corrected or considered as missing data.

32  
33 375 Any changes in the data will be reported.

34  
35 376 Data analyses will be performed by the data management and analysis centre. The analyses will be  
36 377 carried out by an independent statistician with the latest version of the R software environment.

37  
38 378 All of the characteristics collected will be subjected to a descriptive analysis.

39  
40 379

41  
42 380 ***Descriptive analyses***

43  
44  
45 381 A flow-chart diagram will describe the data available for the patient population at baseline, and during  
46 382 each follow-up visit. Eligibility criteria for treated patients will be verified, as well as follow-up and end  
47 383 of study visits. Reasons for premature end of study will be provided.

48  
49  
50 384 Characteristics of the study population and proportions of missing values will be reported. Patient  
51 385 characteristics will be described using mean and standard deviation or median and interquartile range  
52 386 for quantitative variables, and frequencies and distribution for categorical variables. A comparison of  
53  
54 387 baseline characteristics between patients with complete follow-up and those with attrition will be  
55 388 performed. If needed, methods for handling missing data (multiple imputation, mixed model or  
56  
57 389 auxiliary variable) will be used when appropriate.

1  
2  
3 3904  
5 391 **Primary analysis**

6  
7  
8 392 The percentage of patients who have completed at least one PROADAPT program activity at the end  
9 393 of 12 months after the start of treatment will be estimated using mean and standard deviation.

10  
11  
12 394 **Secondary analyses**13  
14 395 **Time-to-event variables: follow-up, overall survival, progression free survival**

15  
16 396 The proportion of events at specific measurement times will be estimated according to the Kaplan-  
17 397 Meier curve. Medians of event-free survival will be reported by treatment arm with its 95 % confidence  
18 398 interval (95 % CI), if the number of events allows estimation of the median.

19  
20  
21 399 Overall survival rate and progression free survival rate at 12 months (after the day of the last revision  
22 400 of surgery or the last day of radiotherapy) will be provided with 95 % CI.

23  
24  
25 401 **Quality of life**

26  
27  
28 402 Analyses of the QoL data will be performed with modified intention to treat (mITT): all included  
29 403 patients, regardless of compliance with the eligibility criteria and whether or not they were followed  
30 404 up and for whom the QoL scores at inclusion will be included in the analysis. Patients' quality of life,  
31 405 linked to health, will be analysed after 3 months through 5 dimensions: mobility, disease burden,  
32 406 emotional and physical functioning, tiredness.

33  
34  
35  
36  
37 40738  
39 408 **Data monitoring**

40  
41 409 The successful completion of the database is ensured by the hospital CRA. The hospital CRA also  
42 410 ensures compliance with the study protocol. The sponsor CRA verifies that the rights of the participants  
43 411 are respected.

44  
45  
46 41247  
48 413 **End of protocol**

49  
50 414 Patients leave the study either on a per-protocol basis during the "end of study visit" on month 12  
51 415 after the intervention or at any time during the conduct of the study if they no longer wish to  
52 416 participate. However, as indicated in the information letter to the patients/caregivers, the data  
53 417 collected before exclusion may be used as part of the study.

54  
55  
56 41857  
58 419 **Confidentiality**59  
60

1  
2  
3 420 Correspondence tables will be kept in a separate file that does not contain clinical data. The access to  
4  
5 421 the nominative information is protected by a password and confidentiality is guaranteed by the study.

6 422

7  
8 423 ***Protocol amendments***

9  
10 424 Any important modifications requiring a new ethics committee approval will be communicated in  
11  
12 425 future publications. Any potential impact of protocol modifications on the results will be discussed as  
13  
14 426 appropriate.

15 427

16  
17 428 ***Trial status***

18  
19 429 Patient enrolment began on July 3, 2018. Data are collecting.

20 430

21  
22  
23 431 ***Patients' and public involvement***

24  
25 432 Patients were involved at different steps of the trial: (i) during PROADAPT booklet conception, several  
26  
27 433 (30) patients were asked to answer an anonymous questionnaire in order to improve its ergonomics;  
28  
29 434 (ii) the information note and consent form of the protocol have been re-read by the patients' review  
30  
31 435 committee of the Ligue Nationale de Lutte contre le Cancer (a French association of cancer patients).

32 436

33  
34 437 **Discussion**

35  
36 438 **Discussion of the intervention**

37  
38  
39 439 Prehabilitation has long been conceptualized as an effective means of improving the functional  
40  
41 440 capacity of the individual to enable him to resist various stressors. Originally developed in the military  
42  
43 441 as the association of physical training to improve strength and endurance, improving nutritional intake  
44  
45 442 and general education (24), it has been transposed into medicine and major surgery – initially when  
46  
47 443 an ICU admission is planned - at the beginning of this century (25).

48 444 Despite a growing interest in the medical community for prehabilitation and particularly cancer  
49  
50 445 prehabilitation, the level of evidence for specific interventions stays too low to be implemented in  
51  
52 446 common care. Among the main disadvantages of published data include the heterogeneity of  
53  
54 447 programs, sometimes poor patient adherence and the fact that most studies were small pilot studies  
55  
56 448 developed for patients more fit and younger than those who should make the best part of  
57  
58 449 prehabilitation. Another point to emphasize is that most programs include only one intervention -  
59  
60 450 physical, nutritional, or psychological rehabilitation - when multimodal interventions are often  
451 considered to be more effective in older populations.

1  
2  
3 452 Considering these points, the PROADAPT intervention was developed according to an innovative  
4  
5 453 management strategy since it started in 2016 by multi-professional meetings conceived as  
6  
7 454 brainstorming sessions in order to develop a multidisciplinary program dedicated to prehabilitation  
8  
9 455 and follow-up of older patients. The multidisciplinary conception of the intervention, the particular  
10  
11 456 attention paid to older patients' specificities and the previous experience of the participants in as  
12  
13 457 various fields as patients' education, cognition, physiotherapy were hopefully the warrants of the most  
14  
15 458 tailored approach to the target population. For example, the booklet typography was of big character  
16  
17 459 font and the illustrations highly schematic with high contrast. Each sentence was verified by a panel of  
18  
19 460 patients in order to insure proper understanding. Finally, the booklet was evaluated by 30 patients,  
20  
21 461 with a high rate of satisfaction (Ravot et al, PROADAPT Pilot trial: A survey on patients' expectations  
22  
23 462 and satisfaction, unpublished data).

24  
25 463 This pilot study is the first step towards an ambitious program, since PROADAPT program will be  
26  
27 464 declined in the future into two randomized studies, PROADAPT-ovary/EWOC-2 (NCT04284969) and  
28  
29 465 PROADAPT sus-mesocolic, designed to evaluate the impact of PROADAPT program on post-treatment  
30  
31 466 complications versus common care. In order to favor patients' compliance and follow-up, an eHealth  
32  
33 467 tool has been developed that will help supervising patients' care courses.

### 34 468 **Discussion of the study design**

35  
36 469 In line with the previous points, this pilot study was designed in order to answer to this critical  
37  
38 470 question: is a multidomain prehabilitation program feasible in an older cancer population? This  
39  
40 471 question encompasses several points: (i) Is the program physically adapted to an older population? (ii)  
41  
42 472 Is such a program applicable in ambulatory care? (iii) How to build pedagogic tools adapted for such  
43  
44 473 ambulatory use? (iv) Are such pedagogic tools understandable? (v) What is the compliance of the  
45  
46 474 patients for each domain of the intervention program?... Another point is to know whether the  
47  
48 475 patient's care team is expected to accept such intervention, but this point was previously evaluated by  
49  
50 476 Ghignone et al. They demonstrated through an international survey that surgeons are generally in  
51  
52 477 favor for such programs since 71 % of them would accept to prehabilitate their elderly patients 4 weeks  
53  
54 478 before surgery, if such intervention is proven to be effective (2). Nevertheless, the participation of  
55  
56 479 surgeons and anesthesiologists during initial brainstorming sessions was of major interest since they  
57  
58 480 enriched a lot the structure of the program.

59  
60 481 Thus, the construct of this trial may appear as highly complex with overabundant secondary endpoints,  
482  
483 but this design encompasses as much as possible the complexity of prevention care in an older  
484  
485 population, which has to mix the adaptation to the target population and the ability to maintain  
486  
487 compliance over time.

485

**486 Ethics and dissemination**

487 The study sponsor is the Hospices Civils de Lyon, responsible for study insurance and  
488 pharmacovigilance. The study protocol was approved by the Ile de France 8 Ethics Committee on May  
489 3, 2018 and cover all sites involved in this study. Several amendments have been added to the first  
490 version of the protocol. The initial approved version was V2 of May 28, 2018, then the amended  
491 versions were as follows: V3 of October 23, 2018 (change in the recruitment period, addition of new  
492 investigation centers), V4 of May 17, 2019 (request for an additional 12 months extension, update with  
493 the GDPR and update of the patient book). Current version is the V4 of May 17, 2019, authorized on  
494 June 27, 2019. The research will be carried out on accordance with the Helsinki Declaration and ICH  
495 GCP Guidelines. Trial protocol fulfills SPIRIT 2013 checklist (Supplementary table 1) and World Health  
496 Organization Trial Registration Data Set (Supplementary table 2). The study complies with the  
497 principles of the data protection act in France and with the General Data Protection Regulations in  
498 force in Europe. Each investigator must collect a written consent at the beginning of the procedure.  
499 This consent is retained in the patient's medical chart. The patient can stop the study at any time with  
500 an oral information at his investigator or clinical research assistant. Patients will be informed on  
501 additional amendments according the law in force.

502 The results of the primary and secondary objectives will be published in peer-reviewed journals. All  
503 authors of future publications will have to meet the criteria for authorship stated in the Uniform  
504 Requirements for Manuscripts Submitted to Biomedical Journals by the International Committee of  
505 Medical Journal Editors.

506

507 Total words count : 4547

508

**509 Abbreviations**

510 ADL: Activities of Daily Living; AIPVQ: Physical Instrumental activities of daily living (in French: Activités  
511 Instrumentales Physiques de la Vie Quotidienne); CRA: Clinical Research Assistant; ESPEN: European  
512 Society for Clinical Nutrition and Metabolism; FSS: Fatigue Severity Scale; GDS: Geriatric Depression  
513 Scale; IADL: Instrumental Activities of Daily Living; ICU: Intensive Care Unit; mITT: Modified Intention  
514 To Treat; MNA: Mini Nutritional Assessment; QLQ: Quality of Life Questionnaire; QoL: Quality of Life;  
515 RAPA: Rapid Assessment of Physical Activity; SF: Short Form; SPPB: Short Physical Performance Battery

516

1  
2  
3 517 **Declarations**  
4

5 518  
6

7  
8 519 **Acknowledgements**  
9

10 520 This pilot protocol is part of the PROADAPT initiative for improving care for older people with cancer.

11 521 The authors wish to thank the professionals who participated to the intervention conception: G.

12 522 Albrand, D. Barnoud, D. Benayoun. B Billod, J. Bonhomme, A.-L. Bres, C. Brunengo, A. Chanelière, D.

13 523 Charley, Y. Chauleur, G. Copaescu, H. Curé, A.-M. Dascalita, B. De La Vigerie, S. Ducoulombier, , O.

14 524 Ganne, F. Gervais, T. Gilbert, M. Giroud, N. Jomard, C. Lecardonnel, B. Leroy, J.-A. Long, A. Marion, E.

15 525 Nony, S. Parent, A. Pelisset-Vanhersecke, A. Pirollet, , J.-E. Terrier, J. Trautmann, M.-A. Vincent.

16 526 The authors also acknowledge the teams of Lyon Sud Hospital, Edouard Herriot Hospital of Lyon, Croix

17 527 Rousse Hospital of Lyon, Annecy Genevois Hospital Center, Hôpital Nord Ouest hospital center,

18 528 Chambéry Hospital Center and Médipôle Lyon-Villeurbanne who contribute to patient enrollment in

19 529 this study.  
20

21 530 The authors would like to thank in particular the patients' review committee of the Ligue Nationale de

22 531 Lutte contre le Cancer for the valuable editing of the information note and the consent form.  
23

24 532 **Funding**  
25

26 533 This work was supported by the Agence Régionale de Santé (ARS) Auvergne Rhône Alpes, through the

27 534 call for projects "Innovate in health for the Auvergne Rhône Alpes region" jointly organized by the ARS,

28 535 Bpifrance, the Auvergne Rhône Alpes region, URIOPASS, ORAIDA and Cluster I-care and the decision of

29 536 the selection committee on June 27, 2016 (Grant N°2016-149 (63)). It provided funding for nurses,

30 537 dieticians, physiotherapists, and clinical research assistants.  
31

32 538 **Availability of data and materials**  
33

34 539 The final dataset of the PROADAPT pilot study will be available on reasonable request after publication

35 540 of the primary objective. Data requests can be submitted to the corresponding author.  
36

37 541 **Competing interest**  
38

39 542 The authors declare that they have no competing interests.  
40

41 543 **Consent for publication**  
42

43 544 Not applicable  
44

45 545 **Author contributions**  
46  
47  
48  
49  
50  
51  
52  
53  
54  
55  
56  
57  
58  
59  
60

1  
2  
3  
4  
5  
6  
7  
8  
9  
10  
11  
12  
13  
14  
15  
16  
17  
18  
19  
20  
21  
22  
23  
24  
25  
26  
27  
28  
29  
30  
31  
32  
33  
34  
35  
36  
37  
38  
39  
40  
41  
42  
43  
44  
45  
46  
47  
48  
49  
50  
51  
52  
53  
54  
55  
56  
57  
58  
59  
60

546 All authors participated to the PROADAPT intervention conception. Study protocol was conceived by  
547 DD, CF, CG, OLS, AM, VP and CR. DD and CF assumed fundraising and grant follow-up. MR led the  
548 drafting of the manuscript. All authors critically reviewed and approved the final version of the  
549 protocol.

550

For peer review only

551 **References**

- 552 1. Tan H-J, Saliba D, Kwan L, Moore AA, Litwin MS. Burden of Geriatric Events Among Older Adults  
553 Undergoing Major Cancer Surgery. *J Clin Oncol*. 2016 Oct 4;34(11):1231–8.
- 554 2. Ghignone F, van Leeuwen BL, Montroni I, Huisman MG, Somasundar P, Cheung KL, et al. The  
555 assessment and management of older cancer patients: A SIOG surgical task force survey on surgeons'  
556 attitudes. *Eur J Surg Oncol EJSO*. 2016 Feb;42(2):297–302.
- 557 3. Arends J, Bachmann P, Baracos V, Barthelemy N, Bertz H, Bozzetti F, et al. ESPEN guidelines on  
558 nutrition in cancer patients. *Clin Nutr [Internet]*. 2016 Aug 6 [cited 2016 Nov 20];0(0). Available from:  
559 [http://www.clinicalnutritionjournal.com/article/S0261-5614\(16\)30181-9/abstract](http://www.clinicalnutritionjournal.com/article/S0261-5614(16)30181-9/abstract)
- 560 4. Singh F, Newton RU, Galvão DA, Spry N, Baker MK. A systematic review of pre-surgical exercise  
561 intervention studies with cancer patients. *Surg Oncol*. 2013 Jun 1;22(2):92–104.
- 562 5. Craig P, Dieppe P, Macintyre S, Michie S, Nazareth I, Petticrew M. Developing and evaluating complex  
563 interventions: the new Medical Research Council guidance. *BMJ*. 2008 Sep 29;337:a1655.
- 564 6. Ferlay J, Soerjomataram I, Ervik M, Dikshit R, Eser S, Mathers C, et al. GLOBOCAN 2012 v1.0, Cancer  
565 Incidence and Mortality Worldwide: IARC CancerBase No. 11 [Internet] [Internet]. Lyon, France:  
566 International Agency for Research on Cancer; 2013 [cited 2016 Sep 4]. Available from: Available from:  
567 <http://globocan.iarc.fr>
- 568 7. Koene RJ, Prizment AE, Blaes A, Konety SH. Shared Risk Factors in Cardiovascular Disease and Cancer.  
569 *Circulation*. 2016 Mar 15;133(11):1104–14.
- 570 8. Sjölund B-M, Wimo A, Qiu C, Engström M, von Strauss E. Time trends in prevalence of activities of  
571 daily living (ADL) disability and survival: Comparing two populations (aged 78+ years) living in a rural  
572 area in Sweden. *Arch Gerontol Geriatr*. 2014 May;58(3):370–5.
- 573 9. Sjölund B-M, Wimo A, Engström M, Strauss E von. Incidence of ADL Disability in Older Persons,  
574 Physical Activities as a Protective Factor and the Need for Informal and Formal Care – Results from the  
575 SNAC-N Project. *PLoS ONE [Internet]*. 2015 [cited 2016 Sep 4];10(9). Available from: [https://www-  
576 ncbi.nlm.nih.gov/pubmed/26144444](https://www.ncbi.nlm.nih.gov/pubmed/26144444)
- 577 10. Jagger C, Gillies C, Moscone F, Cambois E, Van Oyen H, Nusselder W, et al. Inequalities in healthy life  
578 years in the 25 countries of the European Union in 2005: a cross-national meta-regression analysis. *The  
579 Lancet*. 2008 Dec 20;372(9656):2124–31.
- 580 11. Extermann M, Meyer J, McGinnis M, Crocker TT, Corcoran MB, Yoder J, et al. A comprehensive  
581 geriatric intervention detects multiple problems in older breast cancer patients. *Crit Rev Oncol Hematol*.  
582 2004 Jan;49:69–75.
- 583 12. Repetto L, Fratino L, Audisio RA, Venturino A, Gianni W, Vercelli M, et al. Comprehensive geriatric  
584 assessment adds information to Eastern Cooperative Oncology Group performance status in elderly cancer  
585 patients: an Italian Group for Geriatric Oncology Study. *J Clin Oncol*. 2002 Jan 15;20:494–502.
- 586 13. Caillet P, Canoui-Poitrine F, Vouriot J, Berle M, Reinald N, Krypciak S, et al. Comprehensive geriatric  
587 assessment in the decision-making process in elderly patients with cancer: ELCAPA study. *J Clin Oncol*.  
588 2011;29:3636–42.
- 589 14. Falandry C, Stefani L, Granger M, Momiron C, Habchi H, Bourgeois C, et al. Interventions to improve  
590 physical performances of older people with cancer before major surgery: an umbrella review. *J Geriatr  
591 Oncol*. 2018;9(6 suppl 1):S94–5.
- 592 15. Falandry C, Stefani L, André L, Granger M, Barbarava C, Habchi H, et al. Interventions to improve  
593 physical performances of older people with cancer before complex medico-surgical procedures: protocol  
594 for an umbrella review of systematic reviews and meta-analyses. *Medicine (Baltimore)*. 2020;



- 1  
2  
3 595 16. Glasgow RE, Emmons KM. How Can We Increase Translation of Research into Practice? Types of  
4 596 Evidence Needed. *Annu Rev Public Health*. 2007;28(1):413–33.
- 5  
6 597 17. Colburn JL, Mohanty S, Burton JR. Surgical Guidelines for Perioperative Management of Older Adults:  
7 598 What Geriatricians Need to Know. *J Am Geriatr Soc*. 2017 Jun 1;65(6):1339–46.
- 8  
9 599 18. Mohanty S, Rosenthal RA, Russell MM, Neuman MD, Ko CY, Esnaola NF. Optimal Perioperative  
10 600 Management of the Geriatric Patient: A Best Practices Guideline from the American College of Surgeons  
11 601 NSQIP and the American Geriatrics Society. *J Am Coll Surg*. 2016 May 1;222(5):930–47.
- 12  
13 602 19. Katz S, Ford AB, Moskowitz RW, Jackson BA, Jaffe MW. Studies of Illness in the Aged. The Index of  
14 603 Adl: A Standardized Measure of Biological and Psychosocial Function. *Jama*. 1963 Sep 21;185:914–9.
- 15  
16 604 20. Lawton MP, Brody EM. Assessment of older people: self-maintaining and instrumental activities of daily  
17 605 living. *Gerontologist*. 1969 Autumn;9:179–86.
- 18  
19 606 21. de Souto Barreto P, Ferrandez A-M. Activités instrumentales physiques de la vie quotidienne chez les  
20 607 personnes âgées: validation d'une échelle. In: *L'anthropologie du vivant: objets et méthodes*. Chapuis-  
21 608 Lucciani N, Guihard-Costa AM, Boëtsch G. 2010. p. 83–7.
- 22  
23 609 22. Aaronson NK, Ahmedzai S, Bergman B, Bullinger M, Cull A, Duez NJ, et al. The European Organization  
24 610 for Research and Treatment of Cancer QLQ-C30: A Quality-of-Life Instrument for Use in International  
25 611 Clinical Trials in Oncology. *JNCI J Natl Cancer Inst*. 1993 Mar 3;85(5):365–76.
- 26  
27 612 23. Wheelwright S, Darlington A-S, Fitzsimmons D, Fayers P, Arraras JI, Bonnetain F, et al. International  
28 613 validation of the EORTC QLQ-ELD14 questionnaire for assessment of health-related quality of life  
29 614 elderly patients with cancer. *Br J Cancer*. 2013 Aug 20;109(4):852–8.
- 30  
31 615 24. Prehabilitation, rehabilitation, and revocation in the Army. *Br Med J*. 1946 Jun 29;1:192–7.
- 32  
33 616 25. Topp R, Ditmyer M, King K, Doherty K, Hornyak J. The effect of bed rest and potential of prehabilitation  
34 617 on patients in the intensive care unit. *AACN Clin Issues*. 2002 May;13(2):263–76.

618

619

1  
2  
3 620 **Illustrations' legends**  
4

5  
6 621 Figure 1: PROADAPT program: follow-up visits and phone calls  
7

8 622 Figure 2: PROADAPT program: interventions at the patient's level  
9

10 623 Table 1: PROADAPT program: tasks according the different domains and the successive chronological  
11 624 steps (before, during and after complex medico-surgical procedure)  
12

13 625 Table 2: PROADAPT pilot trial: questionnaires and screening tests  
14

15 626 Table 3: PROADAPT pilot trial: flow diagram  
16

17 627  
18

19 628  
20  
21  
22  
23  
24  
25  
26  
27  
28  
29  
30  
31  
32  
33  
34  
35  
36  
37  
38  
39  
40  
41  
42  
43  
44  
45  
46  
47  
48  
49  
50  
51  
52  
53  
54  
55  
56  
57  
58  
59  
60

For peer review only

629 Table 1: PROADAPT program: tasks according the different domains and the successive chronological  
630 steps (before, during and after complex medico-surgical procedure)

|                                                      |                                                                                                                                                                                                                                                                                                                                                                                                                                                                                                                                                                                         |                                                                                                                                                                                                                                                                                                                                                                                                                                                                                                                                                                                                                                                                                                                                                                                                                                                                                                                                                                                                                     |                                                                                                                                                                                                                                                                                                                                                                                                               |                                                                                                                                    |
|------------------------------------------------------|-----------------------------------------------------------------------------------------------------------------------------------------------------------------------------------------------------------------------------------------------------------------------------------------------------------------------------------------------------------------------------------------------------------------------------------------------------------------------------------------------------------------------------------------------------------------------------------------|---------------------------------------------------------------------------------------------------------------------------------------------------------------------------------------------------------------------------------------------------------------------------------------------------------------------------------------------------------------------------------------------------------------------------------------------------------------------------------------------------------------------------------------------------------------------------------------------------------------------------------------------------------------------------------------------------------------------------------------------------------------------------------------------------------------------------------------------------------------------------------------------------------------------------------------------------------------------------------------------------------------------|---------------------------------------------------------------------------------------------------------------------------------------------------------------------------------------------------------------------------------------------------------------------------------------------------------------------------------------------------------------------------------------------------------------|------------------------------------------------------------------------------------------------------------------------------------|
| Nurse coaching & education<br>Bridging interventions | Coaching nurse self-presentation<br>Delivery of a personalized patient book Care according best practice guidelines:<br>- Confirm and document patient goals and treatment preferences, including advance directives.<br>- Confirm and document patient's health care proxy or surrogate decision-maker.<br>- In patients with existing advance directives, discuss new risks associated with the surgical procedure and an approach for potentially life-threatening problems consistent with the patient's values and preferences ("required reconsideration").<br>Weekly phone calls | Coaching nurse visits / phone calls<br>Communication of patient's preference to the staff                                                                                                                                                                                                                                                                                                                                                                                                                                                                                                                                                                                                                                                                                                                                                                                                                                                                                                                           | Coaching nurse visit in the rehabilitation ward<br>Communication of patient's preference and care difficulties to the staff (checklist):<br>- delirium/cognitive impairment<br>- peri-operative acute pain<br>- pulmonary complications<br>- fall risk<br>- ability to maintain adequate nutrition<br>- urinary tract infection prevention<br>- functional decline monitoring<br>- pressure ulcers prevention | Coaching nurse bi-weekly phone call<br>Communication of patient's care difficulties to the staff                                   |
| Nutrition                                            | W-4 : nutritional evaluation<br>Nutritional plan based on measured intake<br>W-3 : nutritional follow up - weight<br>W-2 : nutritional follow up-weight<br>W-1 : nutritional follow up-weight + pre-operative immunonutrition                                                                                                                                                                                                                                                                                                                                                           | If surgery: Care according best practice guidelines:<br>- Consider shortened fluid fast (clear liquids up to 2 hours before anaesthesia).<br>- Normal food intake or enteral feeding should start as early as possible                                                                                                                                                                                                                                                                                                                                                                                                                                                                                                                                                                                                                                                                                                                                                                                              | Nutritional plan based on<br>- Weight curve<br>- Measured intake<br>Optimal management of<br>- Nausea/vomiting<br>- Abdominal pain                                                                                                                                                                                                                                                                            | Nutritional plan based on<br>- Weight curve<br>- Measured intake<br>Optimal management of<br>- Nausea/vomiting<br>- Abdominal pain |
| Physical activity                                    | W-4 : physical performances evaluation<br>Physical activity plan<br>W-3 : group physical activity<br>W-2 : +<br>W-1 : functional follow-up                                                                                                                                                                                                                                                                                                                                                                                                                                              | If surgery: care according best practice guidelines:<br>- Early physical and/or occupational therapy.<br>- Check for orthostatic hypotension.<br>- Review physical environment to reduce injury risk.<br>- Assistive walking devices (eg walkers) at bedside if used as outpatient                                                                                                                                                                                                                                                                                                                                                                                                                                                                                                                                                                                                                                                                                                                                  | (to the discretion of the rehabilitation unit)                                                                                                                                                                                                                                                                                                                                                                | Pursuing of the pre-operative physical activity plan                                                                               |
| Medication conciliation                              | Centralized medication conciliation and treatment optimization (STOPP/START guidelines)                                                                                                                                                                                                                                                                                                                                                                                                                                                                                                 | Centralized medication conciliation<br>Advices for care according best practice guidelines (16):<br>- Adhere to existing best practices regarding antibiotic and venous thromboembolism prophylaxis.<br>- Ensure nonessential medications have been stopped and essential medications have been taken.                                                                                                                                                                                                                                                                                                                                                                                                                                                                                                                                                                                                                                                                                                              | Centralized medication conciliation                                                                                                                                                                                                                                                                                                                                                                           | Centralized medication conciliation                                                                                                |
| Standardization of surgical procedures               |                                                                                                                                                                                                                                                                                                                                                                                                                                                                                                                                                                                         | If surgery: consider antiseptic toothpaste<br>If surgery: care according best practice Guidelines (16):<br>- Consideration of regional techniques to avoid postoperative complications and improve pain control.<br>- Directed pain history.<br>- Multi-modal or opioid-sparing techniques.<br>- Postoperative nausea risk stratification and prevention strategies.<br>- Strategies to avoid pressure ulcers and nerve damage.<br>- Prevention of postoperative pulmonary complications and hypothermia.<br>- Judicious use of intravenous fluids.<br>- Appropriate hemodynamic management.<br>- Continuation of indicated cardiac medications.<br>- Daily post-operative rounding checklist:<br>- delirium/cognitive impairment<br>- peri-operative acute pain<br>- pulmonary complications<br>- fall risk<br>- ability to maintain adequate nutrition<br>- urinary tract infection prevention<br>- functional decline monitoring<br>- Pressure ulcers prevention<br>If surgery: consider IV iron supplementation |                                                                                                                                                                                                                                                                                                                                                                                                               |                                                                                                                                    |

631

632

633 Table 2: PROADAPT pilot trial: questionnaires and screening tests

| Domain                 |                                                           |
|------------------------|-----------------------------------------------------------|
| Autonomy               | Activity of Daily Living Scale (ADL)                      |
|                        | Instrumental Activities of Daily Living scale (IADL)      |
| Geriatric screening    | G8                                                        |
| Physical activity      | RAPA (Rapid Assessment of Physical Activity), AIPVQ       |
| Quality of life        | QLQ-C30, QLQ-ED14, EQ-5D-3L, SF-36                        |
| Locomotion and balance | Time Up and Go, SPPB (Short Physical Performance Battery) |
| Pain                   | Pain scale evaluation                                     |
| Nutrition              | Nutrition scale evaluation                                |
| Tiredness severity     | FSS                                                       |
| Depression/anxiety     | MNA, GDS4/GDS15                                           |
| Cognitive assessment   | MINI-COG                                                  |
| Fall risk assessment   | Tinetti test                                              |
| Breathlessness         | Borg scale                                                |

634

635

636 Table 3: PROADAPT pilot trial: flow diagram

|                                             | Baseline | Pre-therapeutic visit<br>(0-5 days before<br>intervention) | M1, M3, M6 | M12 | End of<br>study visit |
|---------------------------------------------|----------|------------------------------------------------------------|------------|-----|-----------------------|
| <i>Complex geriatric assessment</i>         |          |                                                            |            |     |                       |
| G8                                          | X        |                                                            |            | X   | X                     |
| ADL/IADL                                    | X        |                                                            |            | X   | X                     |
| GDS4/GDS15                                  | X        |                                                            |            | X   | X                     |
| MINI COG                                    | X        |                                                            |            | X   | X                     |
| MNA                                         | X        |                                                            |            | X   | X                     |
| QLQ-C30                                     | X        |                                                            | X          | X   | X                     |
| QLQ-ELD14                                   | X        |                                                            | X          | X   | X                     |
| EQ-5D-3L                                    | X        |                                                            | X          | X   | X                     |
| Pain scale evaluation                       | X        | X                                                          | X          | X   | X                     |
| Nutrition scale evaluation                  | X        | X                                                          | X          | X   | X                     |
| Socio-economic evaluation                   | X        | X                                                          | X          | X   | X                     |
| <i>Physical and respiratory assessments</i> |          |                                                            |            |     |                       |
| FSS                                         | X        |                                                            | X          | X   | X                     |
| SF-36                                       | X        |                                                            | X          | X   | X                     |
| Time and Go                                 | X        |                                                            |            | X   | X                     |
| SPPB                                        | X        |                                                            | X          | X   | X                     |
| Borg scale                                  | X        |                                                            |            | X   | X                     |
| RAPA questionnaire                          | X        |                                                            | X          | X   | X                     |
| AIPVQ scale                                 | X        |                                                            | X          | X   | X                     |
| Tinetti test                                | X        |                                                            |            | X   | X                     |
| Equimog evaluation                          | X        |                                                            |            | X   | X                     |
| Triflo                                      | X        | X                                                          |            |     |                       |
| Voldyne                                     | X        | X                                                          |            |     |                       |
| Physical activity data collection           |          | X                                                          | X          | X   | X                     |
| <i>Patients' satisfaction</i>               |          |                                                            |            |     |                       |
| Standardized questionnaire                  |          |                                                            |            |     | X                     |

637

Figure 1: PROADAPT program: follow-up visits and phone calls

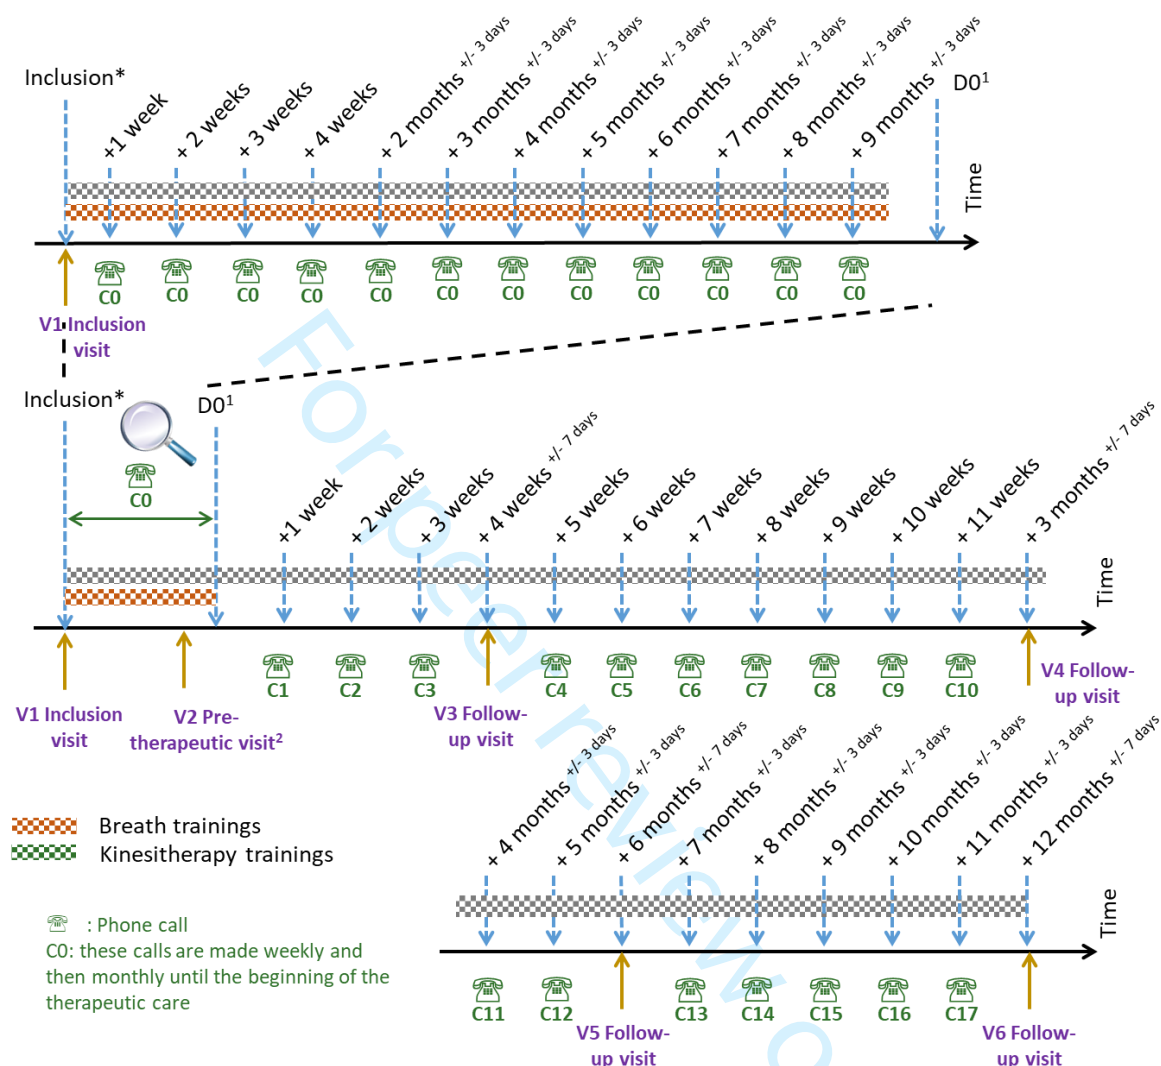

\*Inclusion is made at least 7 days before the date of surgery or the date of the first day of radiotherapy. The duration of pre-habilitation may not exceed 9 months after inclusion.

<sup>1</sup> D0 corresponds to the last day of radiotherapy or the last day of the revision of the surgery within 30 days after the initial operation

<sup>2</sup> Visit should be performed between 5 days before and J0

➔ Weekly calls or visits have no margin, monthly calls have a margin of +/- 3 days and visits have a margin of +/- 7 days.

1  
2  
3  
4  
5  
6  
7  
8  
9  
10  
11  
12  
13  
14  
15  
16  
17  
18  
19  
20  
21  
22  
23  
24  
25  
26  
27  
28  
29  
30  
31  
32  
33  
34  
35  
36  
37  
38  
39  
40  
41  
42  
43  
44  
45  
46  
47  
48  
49  
50  
51  
52  
53  
54  
55  
56  
57  
58  
59  
60

Figure 2: PROADAPT program: interventions at the patient's level

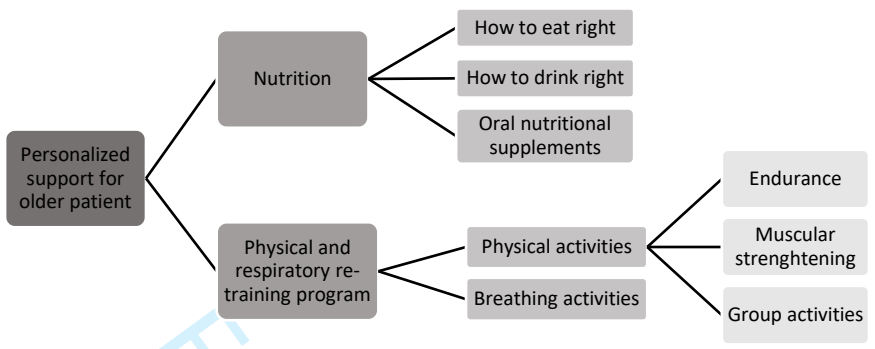

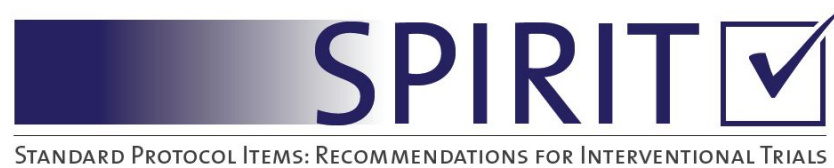

Supplementary table 1: SPIRIT 2013 checklist of the trial

SPIRIT 2013 Checklist: Recommended items to address in a clinical trial protocol and related documents\*

| Section/item                      | ItemNo | Description                                                                                                  | Reported on page #                               |
|-----------------------------------|--------|--------------------------------------------------------------------------------------------------------------|--------------------------------------------------|
| <b>Administrative information</b> |        |                                                                                                              |                                                  |
| Title                             | 1      | Descriptive title identifying the study design, population, interventions, and, if applicable, trial acronym | 1                                                |
| Trial registration                | 2a     | Trial identifier and registry name. If not yet registered, name of intended registry                         | 2                                                |
|                                   | 2b     | All items from the World Health Organization Trial Registration Data Set                                     | Supplementary table 2<br>Ref 24                  |
| Protocol version                  | 3      | Date and version identifier                                                                                  | 17 (Ethics and Consent to participate)           |
| Funding                           | 4      | Sources and types of financial, material, and other support                                                  | 17-18 (Funding)                                  |
| Roles and responsibilities        | 5a     | Names, affiliations, and roles of protocol contributors                                                      | 1 (Authors' list)<br>18 (Authors' contributions) |
|                                   | 5b     | Name and contact information for the trial sponsor                                                           | Supplementary table 2<br>Ref 24                  |



1  
2  
3  
4  
5  
6  
7  
8  
9  
10  
11  
12  
13  
14  
15  
16  
17  
18  
19  
20  
21  
22  
23  
24  
25  
26  
27  
28  
29  
30  
31  
32  
33  
34  
35  
36  
37  
38  
39  
40  
41  
42  
43  
44  
45  
46

|                                                           |    |                                                                                                                                                                                                                                                                                          |                                                                       |
|-----------------------------------------------------------|----|------------------------------------------------------------------------------------------------------------------------------------------------------------------------------------------------------------------------------------------------------------------------------------------|-----------------------------------------------------------------------|
|                                                           | 5c | Role of study sponsor and funders, if any, in study design; collection, management, analysis, and interpretation of data; writing of the report; and the decision to submit the report for publication, including whether they will have ultimate authority over any of these activities | 10 (Ethical and legal considerations)<br>17 (Funding)                 |
|                                                           | 5d | Composition, roles, and responsibilities of the coordinating centre, steering committee, endpoint adjudication committee, data management team, and other individuals or groups overseeing the trial, if applicable (see Item 21a for data monitoring committee)                         | 13 (Data management and statistical analyses)<br>14 (Data monitoring) |
| <b>Introduction</b>                                       |    |                                                                                                                                                                                                                                                                                          |                                                                       |
| Background and rationale                                  | 6a | Description of research question and justification for undertaking the trial, including summary of relevant studies (published and unpublished) examining benefits and harms for each intervention                                                                                       | 3                                                                     |
|                                                           | 6b | Explanation for choice of comparators                                                                                                                                                                                                                                                    | N/A                                                                   |
| Objectives                                                | 7  | Specific objectives or hypotheses                                                                                                                                                                                                                                                        | 4                                                                     |
| Trial design                                              | 8  | Description of trial design including type of trial (eg, parallel group, crossover, factorial, single group), allocation ratio, and framework (eg, superiority, equivalence, noninferiority, exploratory)                                                                                | 5                                                                     |
| <b>Methods: Participants, interventions, and outcomes</b> |    |                                                                                                                                                                                                                                                                                          |                                                                       |
| Study setting                                             | 9  | Description of study settings (eg, community clinic, academic hospital) and list of countries where data will be collected. Reference to where list of study sites can be obtained                                                                                                       | 5                                                                     |

|    |                      |     |                                                                                                                                                                                                                                                                                                                                                                                |                                                                            |
|----|----------------------|-----|--------------------------------------------------------------------------------------------------------------------------------------------------------------------------------------------------------------------------------------------------------------------------------------------------------------------------------------------------------------------------------|----------------------------------------------------------------------------|
| 1  |                      |     |                                                                                                                                                                                                                                                                                                                                                                                |                                                                            |
| 2  |                      |     |                                                                                                                                                                                                                                                                                                                                                                                |                                                                            |
| 3  |                      |     |                                                                                                                                                                                                                                                                                                                                                                                |                                                                            |
| 4  | Eligibility criteria | 10  | Inclusion and exclusion criteria for participants. If applicable, eligibility criteria for study centres and individuals who will perform the interventions (eg, surgeons, psychotherapists)                                                                                                                                                                                   | 5                                                                          |
| 5  |                      |     |                                                                                                                                                                                                                                                                                                                                                                                |                                                                            |
| 6  |                      |     |                                                                                                                                                                                                                                                                                                                                                                                |                                                                            |
| 7  |                      |     |                                                                                                                                                                                                                                                                                                                                                                                |                                                                            |
| 8  | Interventions        | 11a | Interventions for each group with sufficient detail to allow replication, including how and when they will be administered                                                                                                                                                                                                                                                     | 5-6                                                                        |
| 9  |                      |     |                                                                                                                                                                                                                                                                                                                                                                                |                                                                            |
| 10 |                      |     |                                                                                                                                                                                                                                                                                                                                                                                |                                                                            |
| 11 |                      | 11b | Criteria for discontinuing or modifying allocated interventions for a given trial participant (eg, drug dose change in response to harms, participant request, or improving/worsening disease)                                                                                                                                                                                 | 14 (End of protocol)<br>And N/4 (no dose modifications)                    |
| 12 |                      |     |                                                                                                                                                                                                                                                                                                                                                                                |                                                                            |
| 13 |                      |     |                                                                                                                                                                                                                                                                                                                                                                                |                                                                            |
| 14 |                      |     |                                                                                                                                                                                                                                                                                                                                                                                |                                                                            |
| 15 |                      | 11c | Strategies to improve adherence to intervention protocols, and any procedures for monitoring adherence (eg, drug tablet return, laboratory tests)                                                                                                                                                                                                                              | 6 (two turns of validations of the PROADAPT booklet by candidate patients) |
| 16 |                      |     |                                                                                                                                                                                                                                                                                                                                                                                |                                                                            |
| 17 |                      |     |                                                                                                                                                                                                                                                                                                                                                                                |                                                                            |
| 18 |                      |     |                                                                                                                                                                                                                                                                                                                                                                                |                                                                            |
| 19 |                      |     |                                                                                                                                                                                                                                                                                                                                                                                |                                                                            |
| 20 |                      |     |                                                                                                                                                                                                                                                                                                                                                                                |                                                                            |
| 21 |                      | 11d | Relevant concomitant care and interventions that are permitted or prohibited during the trial                                                                                                                                                                                                                                                                                  | N/A                                                                        |
| 22 |                      |     |                                                                                                                                                                                                                                                                                                                                                                                |                                                                            |
| 23 |                      |     |                                                                                                                                                                                                                                                                                                                                                                                |                                                                            |
| 24 | Outcomes             | 12  | Primary, secondary, and other outcomes, including the specific measurement variable (eg, systolic blood pressure), analysis metric (eg, change from baseline, final value, time to event), method of aggregation (eg, median, proportion), and time point for each outcome. Explanation of the clinical relevance of chosen efficacy and harm outcomes is strongly recommended | 11-12                                                                      |
| 25 |                      |     |                                                                                                                                                                                                                                                                                                                                                                                |                                                                            |
| 26 |                      |     |                                                                                                                                                                                                                                                                                                                                                                                |                                                                            |
| 27 |                      |     |                                                                                                                                                                                                                                                                                                                                                                                |                                                                            |
| 28 |                      |     |                                                                                                                                                                                                                                                                                                                                                                                |                                                                            |
| 29 |                      |     |                                                                                                                                                                                                                                                                                                                                                                                |                                                                            |
| 30 |                      |     |                                                                                                                                                                                                                                                                                                                                                                                |                                                                            |
| 31 | Participant timeline | 13  | Time schedule of enrolment, interventions (including any run-ins and washouts), assessments, and visits for participants. A schematic diagram is highly recommended (see Figure)                                                                                                                                                                                               | 8-9                                                                        |
| 32 |                      |     |                                                                                                                                                                                                                                                                                                                                                                                |                                                                            |
| 33 |                      |     |                                                                                                                                                                                                                                                                                                                                                                                |                                                                            |
| 34 |                      |     |                                                                                                                                                                                                                                                                                                                                                                                |                                                                            |
| 35 |                      |     |                                                                                                                                                                                                                                                                                                                                                                                |                                                                            |
| 36 | Sample size          | 14  | Estimated number of participants needed to achieve study objectives and how it was determined, including clinical and statistical assumptions supporting any sample size calculations                                                                                                                                                                                          | 12-13 (Sample size calculation)                                            |
| 37 |                      |     |                                                                                                                                                                                                                                                                                                                                                                                |                                                                            |
| 38 |                      |     |                                                                                                                                                                                                                                                                                                                                                                                |                                                                            |
| 39 |                      |     |                                                                                                                                                                                                                                                                                                                                                                                |                                                                            |
| 40 |                      |     |                                                                                                                                                                                                                                                                                                                                                                                |                                                                            |
| 41 |                      |     |                                                                                                                                                                                                                                                                                                                                                                                |                                                                            |
| 42 |                      |     |                                                                                                                                                                                                                                                                                                                                                                                |                                                                            |
| 43 |                      |     |                                                                                                                                                                                                                                                                                                                                                                                |                                                                            |
| 44 |                      |     |                                                                                                                                                                                                                                                                                                                                                                                |                                                                            |
| 45 |                      |     |                                                                                                                                                                                                                                                                                                                                                                                |                                                                            |
| 46 |                      |     |                                                                                                                                                                                                                                                                                                                                                                                |                                                                            |

1  
2  
3  
4  
5  
6  
7  
8  
9  
10  
11  
12  
13  
14  
15  
16  
17  
18  
19  
20  
21  
22  
23  
24  
25  
26  
27  
28  
29  
30  
31  
32  
33  
34  
35  
36  
37  
38  
39  
40  
41  
42  
43  
44  
45  
46

|             |    |                                                                                     |                              |
|-------------|----|-------------------------------------------------------------------------------------|------------------------------|
| Recruitment | 15 | Strategies for achieving adequate participant enrolment to reach target sample size | N/A (no problem for accrual) |
|-------------|----|-------------------------------------------------------------------------------------|------------------------------|

**Methods: Assignment of interventions (for controlled trials) N/A**

Allocation:

|                                  |     |                                                                                                                                                                                                                                                                                                                                                          |   |
|----------------------------------|-----|----------------------------------------------------------------------------------------------------------------------------------------------------------------------------------------------------------------------------------------------------------------------------------------------------------------------------------------------------------|---|
| Sequence generation              | 16a | Method of generating the allocation sequence (eg, computer-generated random numbers), and list of any factors for stratification. To reduce predictability of a random sequence, details of any planned restriction (eg, blocking) should be provided in a separate document that is unavailable to those who enrol participants or assign interventions | - |
| Allocation concealment mechanism | 16b | Mechanism of implementing the allocation sequence (eg, central telephone; sequentially numbered, opaque, sealed envelopes), describing any steps to conceal the sequence until interventions are assigned                                                                                                                                                | - |
| Implementation                   | 16c | Who will generate the allocation sequence, who will enrol participants, and who will assign participants to interventions                                                                                                                                                                                                                                | - |
| Blinding (masking)               | 17a | Who will be blinded after assignment to interventions (eg, trial participants, care providers, outcome assessors, data analysts), and how                                                                                                                                                                                                                | - |
|                                  | 17b | If blinded, circumstances under which unblinding is permissible, and procedure for revealing a participant’s allocated intervention during the trial                                                                                                                                                                                                     | - |

**Methods: Data collection, management, and analysis**

|    |                         |     |                                                                                                                                                                                                                                                                                                                                                                                                              |                                                  |
|----|-------------------------|-----|--------------------------------------------------------------------------------------------------------------------------------------------------------------------------------------------------------------------------------------------------------------------------------------------------------------------------------------------------------------------------------------------------------------|--------------------------------------------------|
| 1  |                         |     |                                                                                                                                                                                                                                                                                                                                                                                                              |                                                  |
| 2  |                         |     |                                                                                                                                                                                                                                                                                                                                                                                                              |                                                  |
| 3  |                         |     |                                                                                                                                                                                                                                                                                                                                                                                                              |                                                  |
| 4  | Data collection methods | 18a | Plans for assessment and collection of outcome, baseline, and other trial data, including any related processes to promote data quality (eg, duplicate measurements, training of assessors) and a description of study instruments (eg, questionnaires, laboratory tests) along with their reliability and validity, if known. Reference to where data collection forms can be found, if not in the protocol | Table 3                                          |
| 5  |                         |     |                                                                                                                                                                                                                                                                                                                                                                                                              |                                                  |
| 6  |                         |     |                                                                                                                                                                                                                                                                                                                                                                                                              |                                                  |
| 7  |                         |     |                                                                                                                                                                                                                                                                                                                                                                                                              |                                                  |
| 8  |                         |     |                                                                                                                                                                                                                                                                                                                                                                                                              |                                                  |
| 9  |                         |     |                                                                                                                                                                                                                                                                                                                                                                                                              |                                                  |
| 10 |                         |     |                                                                                                                                                                                                                                                                                                                                                                                                              |                                                  |
| 11 |                         |     |                                                                                                                                                                                                                                                                                                                                                                                                              |                                                  |
| 12 |                         | 18b | Plans to promote participant retention and complete follow-up, including list of any outcome data to be collected for participants who discontinue or deviate from intervention protocols                                                                                                                                                                                                                    | N/A                                              |
| 13 |                         |     |                                                                                                                                                                                                                                                                                                                                                                                                              |                                                  |
| 14 |                         |     |                                                                                                                                                                                                                                                                                                                                                                                                              |                                                  |
| 15 |                         |     |                                                                                                                                                                                                                                                                                                                                                                                                              |                                                  |
| 16 | Data management         | 19  | Plans for data entry, coding, security, and storage, including any related processes to promote data quality (eg, double data entry; range checks for data values). Reference to where details of data management procedures can be found, if not in the protocol                                                                                                                                            | 13 (Data management and statistical analyses)    |
| 17 |                         |     |                                                                                                                                                                                                                                                                                                                                                                                                              |                                                  |
| 18 |                         |     |                                                                                                                                                                                                                                                                                                                                                                                                              |                                                  |
| 19 |                         |     |                                                                                                                                                                                                                                                                                                                                                                                                              |                                                  |
| 20 |                         |     |                                                                                                                                                                                                                                                                                                                                                                                                              |                                                  |
| 21 |                         |     |                                                                                                                                                                                                                                                                                                                                                                                                              |                                                  |
| 22 | Statistical methods     | 20a | Statistical methods for analysing primary and secondary outcomes. Reference to where other details of the statistical analysis plan can be found, if not in the protocol                                                                                                                                                                                                                                     | 13-14 (Data management and statistical analyses) |
| 23 |                         |     |                                                                                                                                                                                                                                                                                                                                                                                                              |                                                  |
| 24 |                         |     |                                                                                                                                                                                                                                                                                                                                                                                                              |                                                  |
| 25 |                         |     |                                                                                                                                                                                                                                                                                                                                                                                                              |                                                  |
| 26 |                         | 20b | Methods for any additional analyses (eg, subgroup and adjusted analyses)                                                                                                                                                                                                                                                                                                                                     | N/A                                              |
| 27 |                         |     |                                                                                                                                                                                                                                                                                                                                                                                                              |                                                  |
| 28 |                         | 20c | Definition of analysis population relating to protocol non-adherence (eg, as randomised analysis), and any statistical methods to handle missing data (eg, multiple imputation)                                                                                                                                                                                                                              | N/A                                              |
| 29 |                         |     |                                                                                                                                                                                                                                                                                                                                                                                                              |                                                  |
| 30 |                         |     |                                                                                                                                                                                                                                                                                                                                                                                                              |                                                  |
| 31 |                         |     |                                                                                                                                                                                                                                                                                                                                                                                                              |                                                  |
| 32 |                         |     |                                                                                                                                                                                                                                                                                                                                                                                                              |                                                  |

### Methods: Monitoring

1  
2  
3  
4  
5  
6  
7  
8  
9  
10  
11  
12  
13  
14  
15  
16  
17  
18  
19  
20  
21  
22  
23  
24  
25  
26  
27  
28  
29  
30  
31  
32  
33  
34  
35  
36  
37  
38  
39  
40  
41  
42  
43  
44  
45  
46

Data monitoring

21a

Composition of data monitoring committee (DMC); summary of its role and reporting structure; statement of whether it is independent from the sponsor and competing interests; and reference to where further details about its charter can be found, if not in the protocol. Alternatively, an explanation of why a DMC is not needed

14 (Data Monitoring)

21b

Description of any interim analyses and stopping guidelines, including who will have access to these interim results and make the final decision to terminate the trial

N/A

Harms

22

Plans for collecting, assessing, reporting, and managing solicited and spontaneously reported adverse events and other unintended effects of trial interventions or trial conduct

11 (Secondary outcomes: NCI CTCAE, QOL)

Auditing

23

Frequency and procedures for auditing trial conduct, if any, and whether the process will be independent from investigators and the sponsor

N/A

**Ethics and dissemination**

Research ethics approval

24

Plans for seeking research ethics committee/institutional review board (REC/IRB) approval

10 (Ethical and legal considerations)

Protocol amendments

25

Plans for communicating important protocol modifications (eg, changes to eligibility criteria, outcomes, analyses) to relevant parties (eg, investigators, REC/IRBs, trial participants, trial registries, journals, regulators)

10 (Ethical and legal considerations)  
14 (Protocol amendments)

Consent or assent

26a

Who will obtain informed consent or assent from potential trial participants or authorised surrogates, and how (see Item 32)

10-11 (Ethical and legal considerations)

26b

Additional consent provisions for collection and use of participant data and biological specimens in ancillary studies, if applicable

N/A

|    |                               |     |                                                                                                                                                                                                                                                                                     |                                         |
|----|-------------------------------|-----|-------------------------------------------------------------------------------------------------------------------------------------------------------------------------------------------------------------------------------------------------------------------------------------|-----------------------------------------|
| 1  |                               |     |                                                                                                                                                                                                                                                                                     |                                         |
| 2  |                               |     |                                                                                                                                                                                                                                                                                     |                                         |
| 3  |                               |     |                                                                                                                                                                                                                                                                                     |                                         |
| 4  | Confidentiality               | 27  | How personal information about potential and enrolled participants will be collected, shared, and maintained in order to protect confidentiality before, during, and after the trial                                                                                                | 14 (Confidentiality)                    |
| 5  |                               |     |                                                                                                                                                                                                                                                                                     |                                         |
| 6  |                               |     |                                                                                                                                                                                                                                                                                     |                                         |
| 7  |                               |     |                                                                                                                                                                                                                                                                                     |                                         |
| 8  | Declaration of interests      | 28  | Financial and other competing interests for principal investigators for the overall trial and each study site                                                                                                                                                                       | 17 (Competing interests)                |
| 9  |                               |     |                                                                                                                                                                                                                                                                                     |                                         |
| 10 |                               |     |                                                                                                                                                                                                                                                                                     |                                         |
| 11 | Access to data                | 29  | Statement of who will have access to the final trial dataset, and disclosure of contractual agreements that limit such access for investigators                                                                                                                                     | 17 (Availability of data and materials) |
| 12 |                               |     |                                                                                                                                                                                                                                                                                     |                                         |
| 13 |                               |     |                                                                                                                                                                                                                                                                                     |                                         |
| 14 | Ancillary and post-trial care | 30  | Provisions, if any, for ancillary and post-trial care, and for compensation to those who suffer harm from trial participation                                                                                                                                                       | N/A                                     |
| 15 |                               |     |                                                                                                                                                                                                                                                                                     |                                         |
| 16 |                               |     |                                                                                                                                                                                                                                                                                     |                                         |
| 17 |                               |     |                                                                                                                                                                                                                                                                                     |                                         |
| 18 | Dissemination policy          | 31a | Plans for investigators and sponsor to communicate trial results to participants, healthcare professionals, the public, and other relevant groups (eg, via publication, reporting in results databases, or other data sharing arrangements), including any publication restrictions | 15 (Dissemination policy)               |
| 19 |                               |     |                                                                                                                                                                                                                                                                                     |                                         |
| 20 |                               |     |                                                                                                                                                                                                                                                                                     |                                         |
| 21 |                               |     |                                                                                                                                                                                                                                                                                     |                                         |
| 22 |                               |     |                                                                                                                                                                                                                                                                                     |                                         |
| 23 |                               |     |                                                                                                                                                                                                                                                                                     |                                         |
| 24 |                               | 31b | Authorship eligibility guidelines and any intended use of professional writers                                                                                                                                                                                                      | 15 (Dissemination policy), N/A          |
| 25 |                               |     |                                                                                                                                                                                                                                                                                     |                                         |
| 26 |                               |     |                                                                                                                                                                                                                                                                                     |                                         |
| 27 |                               | 31c | Plans, if any, for granting public access to the full protocol, participant-level dataset, and statistical code                                                                                                                                                                     | N/A                                     |
| 28 |                               |     |                                                                                                                                                                                                                                                                                     |                                         |
| 29 |                               |     |                                                                                                                                                                                                                                                                                     |                                         |
| 30 | <b>Appendices</b>             |     |                                                                                                                                                                                                                                                                                     |                                         |
| 31 |                               |     |                                                                                                                                                                                                                                                                                     |                                         |
| 32 | Informed consent materials    | 32  | Model consent form and other related documentation given to participants and authorised surrogates                                                                                                                                                                                  | Annex 1 (in French)                     |
| 33 |                               |     |                                                                                                                                                                                                                                                                                     |                                         |
| 34 |                               |     |                                                                                                                                                                                                                                                                                     |                                         |
| 35 | Biological specimens          | 33  | Plans for collection, laboratory evaluation, and storage of biological specimens for genetic or molecular analysis in the current trial and for future use in ancillary studies, if applicable                                                                                      | N/A                                     |
| 36 |                               |     |                                                                                                                                                                                                                                                                                     |                                         |
| 37 |                               |     |                                                                                                                                                                                                                                                                                     |                                         |
| 38 |                               |     |                                                                                                                                                                                                                                                                                     |                                         |
| 39 |                               |     |                                                                                                                                                                                                                                                                                     |                                         |
| 40 |                               |     |                                                                                                                                                                                                                                                                                     |                                         |
| 41 |                               |     |                                                                                                                                                                                                                                                                                     |                                         |
| 42 |                               |     |                                                                                                                                                                                                                                                                                     |                                         |
| 43 |                               |     |                                                                                                                                                                                                                                                                                     |                                         |
| 44 |                               |     |                                                                                                                                                                                                                                                                                     |                                         |
| 45 |                               |     |                                                                                                                                                                                                                                                                                     |                                         |
| 46 |                               |     |                                                                                                                                                                                                                                                                                     |                                         |

1  
2  
3  
4  
5  
6  
7  
8  
9  
10  
11  
12  
13  
14  
15  
16  
17  
18  
19  
20  
21  
22  
23  
24  
25  
26  
27  
28  
29  
30  
31  
32  
33  
34  
35  
36  
37  
38  
39  
40  
41  
42  
43  
44  
45  
46

\*It is strongly recommended that this checklist be read in conjunction with the SPIRIT 2013 Explanation & Elaboration for important clarification on the items. Amendments to the protocol should be tracked and dated. The SPIRIT checklist is copyrighted by the SPIRIT Group under the Creative Commons "[Attribution-NonCommercial-NoDerivs 3.0 Unported](#)" license.

For peer review only

Supplementary table 2: All items from the World Health Organization Trial Registration Data Set (SPIRIT item 2b)

| Data category                                 | Information                                                                                                                                                                                                                                                                                                                                                                                                                                                                                                                                                                                                                                                                                                                                                                                                                                                                                     |
|-----------------------------------------------|-------------------------------------------------------------------------------------------------------------------------------------------------------------------------------------------------------------------------------------------------------------------------------------------------------------------------------------------------------------------------------------------------------------------------------------------------------------------------------------------------------------------------------------------------------------------------------------------------------------------------------------------------------------------------------------------------------------------------------------------------------------------------------------------------------------------------------------------------------------------------------------------------|
| Primary registry and trial identifying number | ClinicalTrials.gov<br>NCT03659123                                                                                                                                                                                                                                                                                                                                                                                                                                                                                                                                                                                                                                                                                                                                                                                                                                                               |
| Date of registration in primary registry      | September 6, 2018                                                                                                                                                                                                                                                                                                                                                                                                                                                                                                                                                                                                                                                                                                                                                                                                                                                                               |
| Secondary identifying numbers                 | 69HCL16_0701<br>ID RCB N° 2018-A001026-49                                                                                                                                                                                                                                                                                                                                                                                                                                                                                                                                                                                                                                                                                                                                                                                                                                                       |
| Source(s) of monetary or material support     | Agence Régionale de Santé Auvergne Rhône Alpes                                                                                                                                                                                                                                                                                                                                                                                                                                                                                                                                                                                                                                                                                                                                                                                                                                                  |
| Primary sponsor                               | Hospices Civils de Lyon                                                                                                                                                                                                                                                                                                                                                                                                                                                                                                                                                                                                                                                                                                                                                                                                                                                                         |
| Secondary sponsor(s)                          |                                                                                                                                                                                                                                                                                                                                                                                                                                                                                                                                                                                                                                                                                                                                                                                                                                                                                                 |
| Contact for public queries                    | David Dayde, +33.4.78.86.37.74, david.dayde@chu-lyon.fr                                                                                                                                                                                                                                                                                                                                                                                                                                                                                                                                                                                                                                                                                                                                                                                                                                         |
| Contact for scientific queries                | Claire Falandry, +33.4.78.86.66.34, claire.falandry@chu-lyon.fr                                                                                                                                                                                                                                                                                                                                                                                                                                                                                                                                                                                                                                                                                                                                                                                                                                 |
| Public title                                  | Prehabilitation & Rehabilitation in Oncogeriatrics: Adaptation to Deconditioning Risk and Accompaniment of Patients' With Cancer                                                                                                                                                                                                                                                                                                                                                                                                                                                                                                                                                                                                                                                                                                                                                                |
| Scientific title                              | Prehabilitation & Rehabilitation in Oncogeriatrics: Adaptation to Deconditioning Risk and Accompaniment of Patients' With Cancer, a Multicenter Pilot Study                                                                                                                                                                                                                                                                                                                                                                                                                                                                                                                                                                                                                                                                                                                                     |
| Countries of recruitment                      | France                                                                                                                                                                                                                                                                                                                                                                                                                                                                                                                                                                                                                                                                                                                                                                                                                                                                                          |
| Health condition(s) or problem(s) studied     | Old Injury                                                                                                                                                                                                                                                                                                                                                                                                                                                                                                                                                                                                                                                                                                                                                                                                                                                                                      |
| Intervention(s)                               | Behavioral: standardized geriatric intervention<br>Nutritional care is based on: <ul style="list-style-type: none"> <li>• A personalized evaluation of nutritional balance and nutritional needs of the patient</li> <li>• A weekly follow-up of weight and nutritional intake</li> </ul> Total-body rehabilitation is based on: <ul style="list-style-type: none"> <li>• 2 to 3 times a week: strength exercise</li> <li>• 2 to 3 times a week: endurance exercise, 20 to 45 min each sequence</li> <li>• 2 times a week: respiratory physiotherapy<br/>Pharmaceutical conciliation and optimization according STOPP/START criteria<br/>During peri-operative time, the nurse contacts the surgical team for transmission of patient's personal data, physical medication conciliation results<br/>During rehabilitation time and hospital-home transition time, the nurse contacts</li> </ul> |



| Data category                        | Information                                                                                                                                                                                                                                                                                                                                                                                                                                                                                                                                                                                                                                                                                                                                                                                                                                                                                                                                                             |
|--------------------------------------|-------------------------------------------------------------------------------------------------------------------------------------------------------------------------------------------------------------------------------------------------------------------------------------------------------------------------------------------------------------------------------------------------------------------------------------------------------------------------------------------------------------------------------------------------------------------------------------------------------------------------------------------------------------------------------------------------------------------------------------------------------------------------------------------------------------------------------------------------------------------------------------------------------------------------------------------------------------------------|
|                                      | the rehabilitation team for transmission of patient's personal data and care course, physical (nutritional, functional and/or comorbidities), medication conciliation results.                                                                                                                                                                                                                                                                                                                                                                                                                                                                                                                                                                                                                                                                                                                                                                                          |
| Key inclusion and exclusion criteria | <p>Inclusion Criteria:</p> <p>Patient <math>\geq 70</math> year old OR patient <math>\geq 60</math> years with significant comorbid condition (modified Charlson index <math>\geq 3</math>) or disability (ADL score <math>&lt; 6/6</math>);</p> <p>Histologically or cytologically proven cancer.</p> <p>Life expectancy <math>&gt; 3</math> months.</p> <p>Written informed consent obtained</p> <p>Covered by a Health System where applicable.</p> <p>Exclusion Criteria:</p> <p>Other malignancy within the last 5 years, except for adequately treated carcinoma in situ of the cervix or squamous carcinoma of the skin, or adequately controlled limited basal cell skin cancer.</p> <p>Patient unable to be regularly followed for any reason (geographic, familial, social, psychological).</p> <p>Any mental or physical handicap at risk of interfering with the appropriate treatment.</p> <p>Any administrative or legal supervision where applicable</p> |
| Study type                           | <p>Interventional</p> <p>Allocation: N/A</p> <p>Intervention model: Single Group Assignment</p> <p>Masking: None (Open Label)</p> <p>Primary purpose: Health Services Research</p> <p>Phase II</p>                                                                                                                                                                                                                                                                                                                                                                                                                                                                                                                                                                                                                                                                                                                                                                      |
| Date of first enrolment              | July 3rd, 2018                                                                                                                                                                                                                                                                                                                                                                                                                                                                                                                                                                                                                                                                                                                                                                                                                                                                                                                                                          |
| Target sample size                   | 122                                                                                                                                                                                                                                                                                                                                                                                                                                                                                                                                                                                                                                                                                                                                                                                                                                                                                                                                                                     |
| Recruitment status                   | Recruiting                                                                                                                                                                                                                                                                                                                                                                                                                                                                                                                                                                                                                                                                                                                                                                                                                                                                                                                                                              |
| Primary outcome(s)                   | <p>Implementation of at least one item of PROADAPT standardized geriatric intervention of the program PROADAPT pilot study [ Time Frame: 12 months ]:</p> <ul style="list-style-type: none"> <li>• Preoperative physical activity including strength and endurance exercise assessed by physical exercises accomplished under the supervision of a physiotherapist. Number of patients with at least 1 intervention achieved in the domain.</li> <li>• Nutrition guidelines before and after physical activity assessed by questionnaires. Number of patients with at least 1 intervention achieved in the domain.</li> </ul>                                                                                                                                                                                                                                                                                                                                           |

| Data category          | Information                                                                                                                                                                                                                                                                                                                                                                                                                                                                                                                                                                                                                                                                                                                                                                                                                                              |
|------------------------|----------------------------------------------------------------------------------------------------------------------------------------------------------------------------------------------------------------------------------------------------------------------------------------------------------------------------------------------------------------------------------------------------------------------------------------------------------------------------------------------------------------------------------------------------------------------------------------------------------------------------------------------------------------------------------------------------------------------------------------------------------------------------------------------------------------------------------------------------------|
|                        | <ul style="list-style-type: none"> <li>• Patient education and coaching assessed by questionnaires and visits. Number of patients with at least 1 intervention achieved in the domain</li> <li>• Achievement of standardized intervention procedures, according to the checklist established in consensus with surgeons. Number of patients with at least 1 intervention achieved in the domain</li> <li>• Rehabilitation assessed by questionnaires. Number of patients with at least 1 intervention achieved in the domain</li> <li>• Accomplishment of pharmaceutical medication conciliation and treatment optimization. Number of patients with at least 1 intervention achieved in the domain</li> <li>• Bridging interventions for hospital-to-home transition. Number of patients with at least 1 intervention achieved in the domain</li> </ul> |
| Key secondary outcomes | <ul style="list-style-type: none"> <li>• Post operative morbidity [ Time Frame: 30 and 90 days ] according Clavien-Dindo classification</li> <li>• Post-operative morbidity [ Time Frame: 90 days ] according to NCI CTC v4.4</li> <li>• Therapeutic strategy [ Time Frame: 12 months ]: Treatment plan completion rate: Number of patients for whom the treatment plan was completed.</li> <li>• Progression-free Survival [ Time Frame: 12 months ]</li> <li>• Post-treatment complication [ Time Frame: 12 months ]: Post-treatment complication grade<math>\geq</math>3 according the National Cancer Institute Common Toxicity Criteria version 4 (NCI-CTC-v4)</li> </ul>                                                                                                                                                                           |

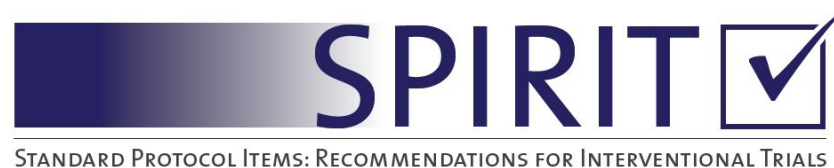

Supplementary table 1: SPIRIT 2013 checklist of the trial

SPIRIT 2013 Checklist: Recommended items to address in a clinical trial protocol and related documents\*

| Section/item                      | ItemNo | Description                                                                                                  | Reported on page #                               |
|-----------------------------------|--------|--------------------------------------------------------------------------------------------------------------|--------------------------------------------------|
| <b>Administrative information</b> |        |                                                                                                              |                                                  |
| Title                             | 1      | Descriptive title identifying the study design, population, interventions, and, if applicable, trial acronym | 1                                                |
| Trial registration                | 2a     | Trial identifier and registry name. If not yet registered, name of intended registry                         | 2                                                |
|                                   | 2b     | All items from the World Health Organization Trial Registration Data Set                                     | Supplementary table 2<br>Ref 24                  |
| Protocol version                  | 3      | Date and version identifier                                                                                  | 17 (Ethics and Consent to participate)           |
| Funding                           | 4      | Sources and types of financial, material, and other support                                                  | 17-18 (Funding)                                  |
| Roles and responsibilities        | 5a     | Names, affiliations, and roles of protocol contributors                                                      | 1 (Authors' list)<br>18 (Authors' contributions) |
|                                   | 5b     | Name and contact information for the trial sponsor                                                           | Supplementary table 2<br>Ref 24                  |

|    |                                                           |    |                                                                                                                                                                                                                                                                                          |
|----|-----------------------------------------------------------|----|------------------------------------------------------------------------------------------------------------------------------------------------------------------------------------------------------------------------------------------------------------------------------------------|
| 1  |                                                           |    |                                                                                                                                                                                                                                                                                          |
| 2  |                                                           |    |                                                                                                                                                                                                                                                                                          |
| 3  |                                                           |    |                                                                                                                                                                                                                                                                                          |
| 4  |                                                           | 5c | Role of study sponsor and funders, if any, in study design; collection, management, analysis, and interpretation of data; writing of the report; and the decision to submit the report for publication, including whether they will have ultimate authority over any of these activities |
| 5  |                                                           |    | 10 (Ethical and legal considerations)                                                                                                                                                                                                                                                    |
| 6  |                                                           |    | 17 (Funding)                                                                                                                                                                                                                                                                             |
| 7  |                                                           |    |                                                                                                                                                                                                                                                                                          |
| 8  |                                                           |    |                                                                                                                                                                                                                                                                                          |
| 9  |                                                           | 5d | Composition, roles, and responsibilities of the coordinating centre, steering committee, endpoint adjudication committee, data management team, and other individuals or groups overseeing the trial, if applicable (see Item 21a for data monitoring committee)                         |
| 10 |                                                           |    | 13 (Data management and statistical analyses)                                                                                                                                                                                                                                            |
| 11 |                                                           |    | 14 (Data monitoring)                                                                                                                                                                                                                                                                     |
| 12 |                                                           |    |                                                                                                                                                                                                                                                                                          |
| 13 |                                                           |    |                                                                                                                                                                                                                                                                                          |
| 14 |                                                           |    |                                                                                                                                                                                                                                                                                          |
| 15 | <b>Introduction</b>                                       |    |                                                                                                                                                                                                                                                                                          |
| 16 |                                                           |    |                                                                                                                                                                                                                                                                                          |
| 17 | Background and rationale                                  | 6a | Description of research question and justification for undertaking the trial, including summary of relevant studies (published and unpublished) examining benefits and harms for each intervention                                                                                       |
| 18 |                                                           |    | 3                                                                                                                                                                                                                                                                                        |
| 19 |                                                           |    |                                                                                                                                                                                                                                                                                          |
| 20 |                                                           |    |                                                                                                                                                                                                                                                                                          |
| 21 |                                                           |    |                                                                                                                                                                                                                                                                                          |
| 22 |                                                           | 6b | Explanation for choice of comparators                                                                                                                                                                                                                                                    |
| 23 |                                                           |    | N/A                                                                                                                                                                                                                                                                                      |
| 24 | Objectives                                                | 7  | Specific objectives or hypotheses                                                                                                                                                                                                                                                        |
| 25 |                                                           |    | 4                                                                                                                                                                                                                                                                                        |
| 26 | Trial design                                              | 8  | Description of trial design including type of trial (eg, parallel group, crossover, factorial, single group), allocation ratio, and framework (eg, superiority, equivalence, noninferiority, exploratory)                                                                                |
| 27 |                                                           |    | 5                                                                                                                                                                                                                                                                                        |
| 28 |                                                           |    |                                                                                                                                                                                                                                                                                          |
| 29 |                                                           |    |                                                                                                                                                                                                                                                                                          |
| 30 |                                                           |    |                                                                                                                                                                                                                                                                                          |
| 31 |                                                           |    |                                                                                                                                                                                                                                                                                          |
| 32 | <b>Methods: Participants, interventions, and outcomes</b> |    |                                                                                                                                                                                                                                                                                          |
| 33 |                                                           |    |                                                                                                                                                                                                                                                                                          |
| 34 | Study setting                                             | 9  | Description of study settings (eg, community clinic, academic hospital) and list of countries where data will be collected. Reference to where list of study sites can be obtained                                                                                                       |
| 35 |                                                           |    | 5                                                                                                                                                                                                                                                                                        |
| 36 |                                                           |    |                                                                                                                                                                                                                                                                                          |
| 37 |                                                           |    |                                                                                                                                                                                                                                                                                          |
| 38 |                                                           |    |                                                                                                                                                                                                                                                                                          |
| 39 |                                                           |    |                                                                                                                                                                                                                                                                                          |
| 40 |                                                           |    |                                                                                                                                                                                                                                                                                          |
| 41 |                                                           |    |                                                                                                                                                                                                                                                                                          |
| 42 |                                                           |    |                                                                                                                                                                                                                                                                                          |
| 43 |                                                           |    |                                                                                                                                                                                                                                                                                          |
| 44 |                                                           |    |                                                                                                                                                                                                                                                                                          |
| 45 |                                                           |    |                                                                                                                                                                                                                                                                                          |
| 46 |                                                           |    |                                                                                                                                                                                                                                                                                          |

1  
2  
3  
4  
5  
6  
7  
8  
9  
10  
11  
12  
13  
14  
15  
16  
17  
18  
19  
20  
21  
22  
23  
24  
25  
26  
27  
28  
29  
30  
31  
32  
33  
34  
35  
36  
37  
38  
39  
40  
41  
42  
43  
44  
45  
46

|                      |     |                                                                                                                                                                                                                                                                                                                                                                                |                                                                            |
|----------------------|-----|--------------------------------------------------------------------------------------------------------------------------------------------------------------------------------------------------------------------------------------------------------------------------------------------------------------------------------------------------------------------------------|----------------------------------------------------------------------------|
| Eligibility criteria | 10  | Inclusion and exclusion criteria for participants. If applicable, eligibility criteria for study centres and individuals who will perform the interventions (eg, surgeons, psychotherapists)                                                                                                                                                                                   | 5                                                                          |
| Interventions        | 11a | Interventions for each group with sufficient detail to allow replication, including how and when they will be administered                                                                                                                                                                                                                                                     | 5-6                                                                        |
|                      | 11b | Criteria for discontinuing or modifying allocated interventions for a given trial participant (eg, drug dose change in response to harms, participant request, or improving/worsening disease)                                                                                                                                                                                 | 14 (End of protocol)<br>And N/4 (no dose modifications)                    |
|                      | 11c | Strategies to improve adherence to intervention protocols, and any procedures for monitoring adherence (eg, drug tablet return, laboratory tests)                                                                                                                                                                                                                              | 6 (two turns of validations of the PROADAPT booklet by candidate patients) |
|                      | 11d | Relevant concomitant care and interventions that are permitted or prohibited during the trial                                                                                                                                                                                                                                                                                  | N/A                                                                        |
| Outcomes             | 12  | Primary, secondary, and other outcomes, including the specific measurement variable (eg, systolic blood pressure), analysis metric (eg, change from baseline, final value, time to event), method of aggregation (eg, median, proportion), and time point for each outcome. Explanation of the clinical relevance of chosen efficacy and harm outcomes is strongly recommended | 11-12                                                                      |
| Participant timeline | 13  | Time schedule of enrolment, interventions (including any run-ins and washouts), assessments, and visits for participants. A schematic diagram is highly recommended (see Figure)                                                                                                                                                                                               | 8-9                                                                        |
| Sample size          | 14  | Estimated number of participants needed to achieve study objectives and how it was determined, including clinical and statistical assumptions supporting any sample size calculations                                                                                                                                                                                          | 12-13 (Sample size calculation)                                            |

1  
2  
3  
4 Recruitment 15 Strategies for achieving adequate participant enrolment to reach target sample size N/A (no problem for accrual)  
5  
6

7 **Methods: Assignment of interventions (for controlled trials)**

N/A

8  
9 Allocation:

10 Sequence generation 16a Method of generating the allocation sequence (eg, computer-generated random numbers), and list of any factors for stratification. To reduce predictability of a random sequence, details of any planned restriction (eg, blocking) should be provided in a separate document that is unavailable to those who enrol participants or assign interventions -  
11  
12  
13  
14  
15  
16  
17 Allocation concealment 16b Mechanism of implementing the allocation sequence (eg, central telephone; sequentially numbered, opaque, sealed envelopes), describing any steps to conceal the sequence until interventions are assigned -  
18 mechanism  
19  
20  
21  
22 Implementation 16c Who will generate the allocation sequence, who will enrol participants, and who will assign participants to interventions -  
23  
24  
25 Blinding (masking) 17a Who will be blinded after assignment to interventions (eg, trial participants, care providers, outcome assessors, data analysts), and how -  
26  
27  
28 17b If blinded, circumstances under which unblinding is permissible, and procedure for revealing a participant's allocated intervention during the trial -  
29  
30  
31

32 **Methods: Data collection, management, and analysis**

1  
2  
3  
4  
5  
6  
7  
8  
9  
10  
11  
12  
13  
14  
15  
16  
17  
18  
19  
20  
21  
22  
23  
24  
25  
26  
27  
28  
29  
30  
31  
32  
33  
34  
35  
36  
37  
38  
39  
40  
41  
42  
43  
44  
45  
46

Data collection methods

18a

Plans for assessment and collection of outcome, baseline, and other trial data, including any related processes to promote data quality (eg, duplicate measurements, training of assessors) and a description of study instruments (eg, questionnaires, laboratory tests) along with their reliability and validity, if known. Reference to where data collection forms can be found, if not in the protocol

Table 3

18b

Plans to promote participant retention and complete follow-up, including list of any outcome data to be collected for participants who discontinue or deviate from intervention protocols

N/A

Data management

19

Plans for data entry, coding, security, and storage, including any related processes to promote data quality (eg, double data entry; range checks for data values). Reference to where details of data management procedures can be found, if not in the protocol

13 (Data management and statistical analyses)

Statistical methods

20a

Statistical methods for analysing primary and secondary outcomes. Reference to where other details of the statistical analysis plan can be found, if not in the protocol

13-14 (Data management and statistical analyses)

20b

Methods for any additional analyses (eg, subgroup and adjusted analyses)

N/A

20c

Definition of analysis population relating to protocol non-adherence (eg, as randomised analysis), and any statistical methods to handle missing data (eg, multiple imputation)

N/A

**Methods: Monitoring**

|    |                                 |     |                                                                                                                                                                                                                                                                                                                                       |                                                                   |
|----|---------------------------------|-----|---------------------------------------------------------------------------------------------------------------------------------------------------------------------------------------------------------------------------------------------------------------------------------------------------------------------------------------|-------------------------------------------------------------------|
| 1  |                                 |     |                                                                                                                                                                                                                                                                                                                                       |                                                                   |
| 2  |                                 |     |                                                                                                                                                                                                                                                                                                                                       |                                                                   |
| 3  |                                 |     |                                                                                                                                                                                                                                                                                                                                       |                                                                   |
| 4  | Data monitoring                 | 21a | Composition of data monitoring committee (DMC); summary of its role and reporting structure; statement of whether it is independent from the sponsor and competing interests; and reference to where further details about its charter can be found, if not in the protocol. Alternatively, an explanation of why a DMC is not needed | 14 (Data Monitoring)                                              |
| 5  |                                 |     |                                                                                                                                                                                                                                                                                                                                       |                                                                   |
| 6  |                                 |     |                                                                                                                                                                                                                                                                                                                                       |                                                                   |
| 7  |                                 |     |                                                                                                                                                                                                                                                                                                                                       |                                                                   |
| 8  |                                 |     |                                                                                                                                                                                                                                                                                                                                       |                                                                   |
| 9  |                                 |     |                                                                                                                                                                                                                                                                                                                                       |                                                                   |
| 10 |                                 |     |                                                                                                                                                                                                                                                                                                                                       |                                                                   |
| 11 |                                 | 21b | Description of any interim analyses and stopping guidelines, including who will have access to these interim results and make the final decision to terminate the trial                                                                                                                                                               | N/A                                                               |
| 12 |                                 |     |                                                                                                                                                                                                                                                                                                                                       |                                                                   |
| 13 |                                 |     |                                                                                                                                                                                                                                                                                                                                       |                                                                   |
| 14 |                                 |     |                                                                                                                                                                                                                                                                                                                                       |                                                                   |
| 15 | Harms                           | 22  | Plans for collecting, assessing, reporting, and managing solicited and spontaneously reported adverse events and other unintended effects of trial interventions or trial conduct                                                                                                                                                     | 11 (Secondary outcomes: NCI CTCAE, QOL)                           |
| 16 |                                 |     |                                                                                                                                                                                                                                                                                                                                       |                                                                   |
| 17 |                                 |     |                                                                                                                                                                                                                                                                                                                                       |                                                                   |
| 18 |                                 |     |                                                                                                                                                                                                                                                                                                                                       |                                                                   |
| 19 | Auditing                        | 23  | Frequency and procedures for auditing trial conduct, if any, and whether the process will be independent from investigators and the sponsor                                                                                                                                                                                           | N/A                                                               |
| 20 |                                 |     |                                                                                                                                                                                                                                                                                                                                       |                                                                   |
| 21 |                                 |     |                                                                                                                                                                                                                                                                                                                                       |                                                                   |
| 22 |                                 |     |                                                                                                                                                                                                                                                                                                                                       |                                                                   |
| 23 | <b>Ethics and dissemination</b> |     |                                                                                                                                                                                                                                                                                                                                       |                                                                   |
| 24 |                                 |     |                                                                                                                                                                                                                                                                                                                                       |                                                                   |
| 25 | Research ethics approval        | 24  | Plans for seeking research ethics committee/institutional review board (REC/IRB) approval                                                                                                                                                                                                                                             | 10 (Ethical and legal considerations)                             |
| 26 |                                 |     |                                                                                                                                                                                                                                                                                                                                       |                                                                   |
| 27 |                                 |     |                                                                                                                                                                                                                                                                                                                                       |                                                                   |
| 28 | Protocol amendments             | 25  | Plans for communicating important protocol modifications (eg, changes to eligibility criteria, outcomes, analyses) to relevant parties (eg, investigators, REC/IRBs, trial participants, trial registries, journals, regulators)                                                                                                      | 10 (Ethical and legal considerations)<br>14 (Protocol amendments) |
| 29 |                                 |     |                                                                                                                                                                                                                                                                                                                                       |                                                                   |
| 30 |                                 |     |                                                                                                                                                                                                                                                                                                                                       |                                                                   |
| 31 |                                 |     |                                                                                                                                                                                                                                                                                                                                       |                                                                   |
| 32 |                                 |     |                                                                                                                                                                                                                                                                                                                                       |                                                                   |
| 33 |                                 |     |                                                                                                                                                                                                                                                                                                                                       |                                                                   |
| 34 | Consent or assent               | 26a | Who will obtain informed consent or assent from potential trial participants or authorised surrogates, and how (see Item 32)                                                                                                                                                                                                          | 10-11 (Ethical and legal considerations)                          |
| 35 |                                 |     |                                                                                                                                                                                                                                                                                                                                       |                                                                   |
| 36 |                                 |     |                                                                                                                                                                                                                                                                                                                                       |                                                                   |
| 37 |                                 |     |                                                                                                                                                                                                                                                                                                                                       |                                                                   |
| 38 |                                 | 26b | Additional consent provisions for collection and use of participant data and biological specimens in ancillary studies, if applicable                                                                                                                                                                                                 | N/A                                                               |
| 39 |                                 |     |                                                                                                                                                                                                                                                                                                                                       |                                                                   |
| 40 |                                 |     |                                                                                                                                                                                                                                                                                                                                       |                                                                   |
| 41 |                                 |     |                                                                                                                                                                                                                                                                                                                                       |                                                                   |
| 42 |                                 |     |                                                                                                                                                                                                                                                                                                                                       |                                                                   |
| 43 |                                 |     |                                                                                                                                                                                                                                                                                                                                       |                                                                   |
| 44 |                                 |     |                                                                                                                                                                                                                                                                                                                                       |                                                                   |
| 45 |                                 |     |                                                                                                                                                                                                                                                                                                                                       |                                                                   |
| 46 |                                 |     |                                                                                                                                                                                                                                                                                                                                       |                                                                   |



1  
2  
3  
4  
5  
6  
7  
8  
9  
10  
11  
12  
13  
14  
15  
16  
17  
18  
19  
20  
21  
22  
23  
24  
25  
26  
27  
28  
29  
30  
31  
32  
33  
34  
35  
36  
37  
38  
39  
40  
41  
42  
43  
44  
45  
46

|                               |     |                                                                                                                                                                                                                                                                                     |                                         |
|-------------------------------|-----|-------------------------------------------------------------------------------------------------------------------------------------------------------------------------------------------------------------------------------------------------------------------------------------|-----------------------------------------|
| Confidentiality               | 27  | How personal information about potential and enrolled participants will be collected, shared, and maintained in order to protect confidentiality before, during, and after the trial                                                                                                | 14 (Confidentiality)                    |
| Declaration of interests      | 28  | Financial and other competing interests for principal investigators for the overall trial and each study site                                                                                                                                                                       | 17 (Competing interests)                |
| Access to data                | 29  | Statement of who will have access to the final trial dataset, and disclosure of contractual agreements that limit such access for investigators                                                                                                                                     | 17 (Availability of data and materials) |
| Ancillary and post-trial care | 30  | Provisions, if any, for ancillary and post-trial care, and for compensation to those who suffer harm from trial participation                                                                                                                                                       | N/A                                     |
| Dissemination policy          | 31a | Plans for investigators and sponsor to communicate trial results to participants, healthcare professionals, the public, and other relevant groups (eg, via publication, reporting in results databases, or other data sharing arrangements), including any publication restrictions | 15 (Dissemination policy)               |
|                               | 31b | Authorship eligibility guidelines and any intended use of professional writers                                                                                                                                                                                                      | 15 (Dissemination policy), N/A          |
|                               | 31c | Plans, if any, for granting public access to the full protocol, participant-level dataset, and statistical code                                                                                                                                                                     | N/A                                     |
| <b>Appendices</b>             |     |                                                                                                                                                                                                                                                                                     |                                         |
| Informed consent materials    | 32  | Model consent form and other related documentation given to participants and authorised surrogates                                                                                                                                                                                  | Annex 1 (in French)                     |
| Biological specimens          | 33  | Plans for collection, laboratory evaluation, and storage of biological specimens for genetic or molecular analysis in the current trial and for future use in ancillary studies, if applicable                                                                                      | N/A                                     |

1  
2  
3 \*It is strongly recommended that this checklist be read in conjunction with the SPIRIT 2013 Explanation & Elaboration for important clarification on  
4 the items. Amendments to the protocol should be tracked and dated. The SPIRIT checklist is copyrighted by the SPIRIT Group under the Creative  
5 Commons "[Attribution-NonCommercial-NoDerivs 3.0 Unported](#)" license.  
6  
7  
8  
9  
10  
11  
12  
13  
14  
15  
16  
17  
18  
19  
20  
21  
22  
23  
24  
25  
26  
27  
28  
29  
30  
31  
32  
33  
34  
35  
36  
37  
38  
39  
40  
41  
42  
43  
44  
45  
46

For peer review only

# BMJ Open

## Feasibility of a prehabilitation program dedicated to older cancer patients before complex medico-surgical procedures: the PROADAPT pilot study protocol

|                               |                                                                                                                                                                                                                                                                                                                                                                                                                                                                                                                                                                                                                                                                                                                                                                                                                                                                                                                                                                                                                                                                                                                                                                                                                                                                                                                                                                                                                                                                                                                                                                                                                                                                                                                                                                                                                                                                                                                                                                                                                                                                                    |
|-------------------------------|------------------------------------------------------------------------------------------------------------------------------------------------------------------------------------------------------------------------------------------------------------------------------------------------------------------------------------------------------------------------------------------------------------------------------------------------------------------------------------------------------------------------------------------------------------------------------------------------------------------------------------------------------------------------------------------------------------------------------------------------------------------------------------------------------------------------------------------------------------------------------------------------------------------------------------------------------------------------------------------------------------------------------------------------------------------------------------------------------------------------------------------------------------------------------------------------------------------------------------------------------------------------------------------------------------------------------------------------------------------------------------------------------------------------------------------------------------------------------------------------------------------------------------------------------------------------------------------------------------------------------------------------------------------------------------------------------------------------------------------------------------------------------------------------------------------------------------------------------------------------------------------------------------------------------------------------------------------------------------------------------------------------------------------------------------------------------------|
| Journal:                      | <i>BMJ Open</i>                                                                                                                                                                                                                                                                                                                                                                                                                                                                                                                                                                                                                                                                                                                                                                                                                                                                                                                                                                                                                                                                                                                                                                                                                                                                                                                                                                                                                                                                                                                                                                                                                                                                                                                                                                                                                                                                                                                                                                                                                                                                    |
| Manuscript ID                 | bmjopen-2020-042960.R1                                                                                                                                                                                                                                                                                                                                                                                                                                                                                                                                                                                                                                                                                                                                                                                                                                                                                                                                                                                                                                                                                                                                                                                                                                                                                                                                                                                                                                                                                                                                                                                                                                                                                                                                                                                                                                                                                                                                                                                                                                                             |
| Article Type:                 | Protocol                                                                                                                                                                                                                                                                                                                                                                                                                                                                                                                                                                                                                                                                                                                                                                                                                                                                                                                                                                                                                                                                                                                                                                                                                                                                                                                                                                                                                                                                                                                                                                                                                                                                                                                                                                                                                                                                                                                                                                                                                                                                           |
| Date Submitted by the Author: | 16-Nov-2020                                                                                                                                                                                                                                                                                                                                                                                                                                                                                                                                                                                                                                                                                                                                                                                                                                                                                                                                                                                                                                                                                                                                                                                                                                                                                                                                                                                                                                                                                                                                                                                                                                                                                                                                                                                                                                                                                                                                                                                                                                                                        |
| Complete List of Authors:     | <p>Roche, Mélanie; Hospices Civils de Lyon, Plateforme Transversale de Recherche de l'ICHCL</p> <p>Ravot, Christine; Hospices Civils de Lyon, Geriatrics unit. Centre Hospitalier Lyon Sud</p> <p>Malapert, Amélie; Hospices Civils de Lyon, Plateforme Transversale de Recherche de l'ICHCL</p> <p>Garandeau, Charlène; Hospices Civils de Lyon, Direction à la Recherche Clinique et à l'Innovation</p> <p>Pitiot, Virginie; Hospices Civils de Lyon, Plateforme Transversale de Recherche de l'ICHCL</p> <p>Tomatis, Mélanie; Hospices Civils de Lyon, Geriatrics unit. Centre Hospitalier Lyon Sud</p> <p>Riche, Benjamin; Hospices Civils de Lyon, Service de Biostatistique - Bioinformatique, Pôle Santé Publique; Université de Lyon, Laboratoire de Biométrie et Biologie Évolutive CNRS UMR 5558, Équipe Biostatistiques Santé</p> <p>Galamand, Béatrice; Hospices Civils de Lyon, Geriatrics unit. Centre Hospitalier Lyon Sud</p> <p>Granger, Marion; Hospices Civils de Lyon, Geriatrics unit; Centre Hospitalier de Chambéry</p> <p>Barbavara, Claire; Hospices Civils de Lyon, Geriatrics unit</p> <p>Bourgeois, Chrystelle; Centre Hospitalier Annecy Genevois, Medical Oncology</p> <p>Genest, Evelyne; Hospices Civils de Lyon, Geriatrics unit</p> <p>Stefani, Laetitia; Centre Hospitalier Annecy Genevois, Medical oncology</p> <p>Haïne, Max; Hôpital Nord-Ouest, Pôle de gériatrie et Médecine de Réadaptation</p> <p>Castel-Kremer, Elisabeth; Hospices Civils de Lyon, Geriatrics unit. Hôpital Edouard Herriot.</p> <p>Morel-Soldner, Isabelle; Hospices Civils de Lyon, Geriatrics unit. Centre Hospitalier de la Croix Rousse</p> <p>Collange, Vincent; Medipole Lyon-Villeurbanne, Département anesthésie réanimation</p> <p>Le Saux, Olivia; Centre de Recherche en Cancérologie de Lyon, Therapeutic targeting of the tumor cell and its immune microenvironment</p> <p>Dayde, David; Hospices Civils de Lyon, Plateforme Transversale de Recherche de l'ICHCL</p> <p>Falandry, Claire; Hospices Civils de Lyon, Geriatrics unit; University of</p> |

1  
2  
3  
4  
5  
6  
7  
8  
9  
10  
11  
12  
13  
14  
15  
16  
17  
18  
19  
20  
21  
22  
23  
24  
25  
26  
27  
28  
29  
30  
31  
32  
33  
34  
35  
36  
37  
38  
39  
40  
41  
42  
43  
44  
45  
46  
47  
48  
49  
50  
51  
52  
53  
54  
55  
56  
57  
58  
59  
60

|                                    |                                                                                                                                |
|------------------------------------|--------------------------------------------------------------------------------------------------------------------------------|
|                                    | Lyon, CarMeN Laboratory, Inserm U1060, INRA U1397, Université Claude Bernard Lyon 1, INSA Lyon, Charles Mérieux Medical School |
| <b>Primary Subject Heading</b> :   | Oncology                                                                                                                       |
| <b>Secondary Subject Heading</b> : | Geriatric medicine, Surgery                                                                                                    |
| <b>Keywords</b> :                  | Adult oncology < ONCOLOGY, GERIATRIC MEDICINE, REHABILITATION MEDICINE, Adult surgery < SURGERY                                |
|                                    |                                                                                                                                |

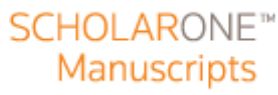



I, the Submitting Author has the right to grant and does grant on behalf of all authors of the Work (as defined in the below author licence), an exclusive licence and/or a non-exclusive licence for contributions from authors who are: i) UK Crown employees; ii) where BMJ has agreed a CC-BY licence shall apply, and/or iii) in accordance with the terms applicable for US Federal Government officers or employees acting as part of their official duties; on a worldwide, perpetual, irrevocable, royalty-free basis to BMJ Publishing Group Ltd ("BMJ") its licensees and where the relevant Journal is co-owned by BMJ to the co-owners of the Journal, to publish the Work in this journal and any other BMJ products and to exploit all rights, as set out in our [licence](#).

The Submitting Author accepts and understands that any supply made under these terms is made by BMJ to the Submitting Author unless you are acting as an employee on behalf of your employer or a postgraduate student of an affiliated institution which is paying any applicable article publishing charge ("APC") for Open Access articles. Where the Submitting Author wishes to make the Work available on an Open Access basis (and intends to pay the relevant APC), the terms of reuse of such Open Access shall be governed by a Creative Commons licence – details of these licences and which [Creative Commons](#) licence will apply to this Work are set out in our licence referred to above.

Other than as permitted in any relevant BMJ Author's Self Archiving Policies, I confirm this Work has not been accepted for publication elsewhere, is not being considered for publication elsewhere and does not duplicate material already published. I confirm all authors consent to publication of this Work and authorise the granting of this licence.

1  
2  
3  
4 1 **Feasibility of a prehabilitation program dedicated to older cancer**  
5  
6 2 **patients before complex medico-surgical procedures: the PROADAPT**  
7  
8 3 **pilot study protocol**  
9

10  
11 4 Roche Mélanie (melanie.roche02@chu-lyon.fr)

12  
13 5 Ravot Christine (christine.ravot@chu-lyon.fr)

14  
15 6 Malapert Amélie (amelie.malapert@chu-lyon.fr)

16  
17 7 Charlène Garandea (charlene.garandea@chu-lyon.fr)

18  
19 8 Pitiot Virginie (virginie.pitiot@chu-lyon.fr)

20  
21 9 Tomatis Mélanie (melanie.tomatis@chu-lyon.fr)

22  
23 10 Benjamin Riche (benjamin.riche@chu-lyon.fr)

24  
25 11 Béatrice Galamand (beatrice.galamand@chu-lyon.fr)

26  
27 12 Marion Granger (mariongranger@outlook.fr)

28  
29 13 Claire Barbavara (claire.barbavara@gmail.com)

30  
31 14 Chrystelle Bourgeois (cbourgeois@ch-annecygenevois.fr)

32  
33 15 Evelyne Genest (evelyne.genest@chu-lyon.fr)

34  
35 16 Laetitia Stefani (lstefani@ch-annecygenevois.fr)

36  
37 17 Max Haine (mhaine@lhospitalnordouest.fr)

38  
39 18 Elisabeth Castel Kremer (Elisabeth.castel-kremer@chu-lyon.fr)

40  
41 19 Isabelle Morel-Soldner (isabelle.morel-soldner@chu-lyon.fr)

42  
43 20 Vincent Collange (collangev@gmail.com)

44  
45 21 Olivia Le Saux (Olivia.LESAUX@lyon.unicancer.fr)

46  
47 22 David Dayde (david.dayde@chu-lyon.fr)

48  
49 23 Claire Falandry ([claire.falandry@chu-lyon.fr](mailto:claire.falandry@chu-lyon.fr)) (Corresponding author)

50  
51 24 Corresponding email address: [claire.falandry@chu-lyon.fr](mailto:claire.falandry@chu-lyon.fr)  
52  
53  
54  
55  
56  
57  
58  
59  
60

## 25 **Abstract**

26 **Background:** Aging is associated with an increased prevalence of co-morbidities and sarcopenia and  
27 with a decline of functional reserve of multiple organ systems, eventually leading in the context of the  
28 disease- and/or treatment-related stress to functional deconditioning or organ failure. The  
29 multicomponent intervention “PROADAPT” was built multi-professionally to implement  
30 prehabilitation in older cancer patients.

31 **Methods:** PROADAPT-pilot study is an interventional, non-comparative, prospective, multicenter  
32 study. It will include 122 patients oriented to complex medico-surgical curative procedures (major  
33 surgery or radiation therapy +/- chemotherapy). After informed consent, patients will undergo a  
34 comprehensive geriatric assessment and will be offered a prehabilitation kit “PROADAPT” including an  
35 advices booklet with personalized objectives and respiratory rehabilitation devices. Patients will then  
36 be called weekly and monitored for physical and respiratory rehabilitation, pre-operative re-nutrition,  
37 motivational counseling, and iatrogenic prevention. Six outpatient consultations will be planned at  
38 inclusion, few days before the procedure, at 1, 3, 6 and 12 months after the end of the procedure. The  
39 main outcome of the study is the feasibility of the intervention, defined as the ability to perform at  
40 least one of the components of the program. Clinical data collection will include patient-specific and  
41 cancer-specific characteristics.

42 **Ethics and dissemination:** Study protocol and several amendments were ethically approved by Ile de  
43 France 8 Ethics Committee on May 3, 2018. The results of the primary and secondary objectives will  
44 be published in peer-reviewed journals. ClinicalTrials registration: NCT03659123.

45 **Keywords:** oncogeriatrics, prehabilitation, motivation, sarcopenia, older cancer patients, care  
46 pathway.

## 48 **Article summary**

### 49 Strengths and limitations of this study

- 50 - PROADAPT program is a prehabilitation program specifically tailored for older cancer patients
- 51 - The program was designed according a multidisciplinary analysis of available evidence and  
52 according a multistep validation process involving patients
- 53 - PROADAPT pilot trial is a prospective and multicenter trial designed to evaluate the feasibility  
54 of the intervention
- 55 - Different secondary outcomes including quality of life will be collected to better adapt the  
56 program to patients’ specificities

1  
2  
3  
4  
5  
6  
7  
8  
9  
10  
11  
12  
13  
14  
15  
16  
17  
18  
19  
20  
21  
22  
23  
24  
25  
26  
27  
28  
29  
30  
31  
32  
33  
34  
35  
36  
37  
38  
39  
40  
41  
42  
43  
44  
45  
46  
47  
48  
49  
50  
51  
52  
53  
54  
55  
56  
57  
58  
59  
60

57 A specific attention will be paid on program safety and patients' adherence to the program.

58

59

For peer review only



## 60 Introduction

61 Many oncological situations involve complex medical-surgical procedures at risk of patient's  
62 deconditioning. Surgery or complex medico-surgical procedures can be considered as one proof-of  
63 principle of such risks, since major cancer surgery exposes the older population to a higher risk of  
64 morbi-mortality and unplanned hospitalization for geriatric events (1). Outpatient treatments and  
65 rapid post-operative rehabilitation strategies are used to decrease post-operative deconditioning but  
66 do not take geriatric risk factors into account. The deconditioning of older patients, not anticipated,  
67 can thus lead to prolonged and iatrogenic hospitalizations such as immobilization syndrome, acute  
68 confusion, undernutrition, falls, de novo urinary incontinence and adverse drug events, generating  
69 frustration, appeals by patients and their families and additional hospital costs.

70 In order to reduce complications after surgery, prehabilitation has often been considered, and it can  
71 be estimated that a majority of surgeons would accept a 4 weeks delay before surgery to improve  
72 older patients' outcomes if shown to be beneficial (2–9). However, the actual level of evidence  
73 depends on the interventions: high for pre-operative nutrition (10), but low for physical exercise, due  
74 to heterogeneous programs with often bad adherence (11). In addition, geriatric validated  
75 interventions, in order to prevent iatrogenic event, may be added in a multi-interventional model of  
76 intervention.

77 To date, the interventions likely to prevent geriatric deconditioning include nutritional care, pre-  
78 therapeutic (prehabilitation) and post-therapeutic (rehabilitation) physical reconditioning, iatrogenic  
79 prevention (drug and care system-related) and hospital-to-home transition to limit the risk of early  
80 readmission of patients. Nevertheless, the level of evidence for each of these care segments remains  
81 limited, and not specific to the oncogeriatric population. Indeed, studies about more specific care have  
82 already been carried out but do not consider all of the above interventions (12). Moreover, cancer in  
83 the older patient is often associated with comorbidities, particularly cardiovascular disease (13,14).  
84 The older population also has a higher risk of loss of autonomy and cognitive impairment, which can  
85 be increased with surgery (15–17). In response to the growing population of older cancer patients, a  
86 modification of oncological care and the implementation of specific geriatric interventions have been  
87 developed (18–20).

88 PROADAPT (Prehabilitation & Rehabilitation in Oncogeriatrics: Adaptation to Deconditioning risk and  
89 Accompaniment of Patients' Trajectories) is a geriatric intervention program constructed on a multi-  
90 professional and multi-disciplinary basis after a systematic analysis of published data. It includes: 1)  
91 before surgery: prehabilitation of patients, including nutritional, physical, respiratory and motivational  
92 counselling; 2) during hospitalisation for surgery (if performed): optimization of their treatment by  
93 pharmaceutical reconciliation, educational interventions, standardization of surgical interventions and

1  
2  
3 94 improved rehabilitation after surgery; 3) bridging and post-discharge interventions for hospital-to-  
4 home transition (table 1).

5 95  
6 96  
7

## 8 97 **Methods and analysis**

### 10 98 **Objectives**

#### 11 99 *Primary objective*

12  
13 100 The primary objective of the PROADAPT pilot study is to assess the feasibility of the program, defined  
14 as the achievement of at least one item of the program during patient's follow up.  
15 101  
16 102

#### 17 103 *Secondary objectives*

18 104 The secondary objectives of the study are:

- 19 105 1) To assess the achievement of each item of the program independently of each other (rate of  
20 achievement of all or part of the instructions);
- 21 106 2) To assess patients' satisfaction with the program;
- 22 107 3) To estimate the rate of adherence to items during the various visits;
- 23 108 4) To appreciate the longitudinal evolution over 1 year.

24 109  
25 110 In addition to these secondary objectives, a series of parameters will be measured and monitored  
26 in this order:  
27 111

- 28 112 5) To assess patients' post treatment complications according Clavien Dindo and NCI-CTC version  
29 4 scoring systems(21);
- 30 113 6) To estimate the rate and the nature of post-operative complications according to the CCI index  
31 at 30 and 90 days;
- 32 114 7) To estimate the post-operative mortality at 30 and 90 days;
- 33 115 8) To estimate the costs of treatments (health system, patients);
- 34 116 9) To study the therapeutic strategies (treatment completion rate);
- 35 117 10) To estimate the progression-free survival rate at one year (PFS);
- 36 118 11) To estimate the overall survival rate at one year (OS);
- 37 119 12) To study the physical performance tests and the evolution of these performances through the  
38 proposed exercises;
- 39 120 13) To study the other dimensions of quality of life relating to health at 3 months;
- 40 121 14) To estimate the longitudinal evolution of QoL;
- 41 122 15) To estimate the tolerance of treatments;

1  
2  
3 126 16) To estimate the evolution of geriatric covariates.  
4

5 127 **Study design**  
6

7  
8 128 PROADAPT - pilot phase is a second category interventional study involving the Human Person with  
9 129 minimal risks and constraints excluding health products. It is a prospective, non-comparative  
10 130 multicenter opened in different centers of Auvergne-Rhône-Alpes region, France (n=7).  
11  
12

13 131 **Study sites and participants**  
14

15  
16 132 The study population will include older patients identified during multidisciplinary consultation  
17 133 meetings and oriented to complex medico-surgical curative procedures in the including centers (Lyon  
18 134 Sud Hospital, Croix Rousse Hospital and Edouard Herriot Hospital from the Hospices Civils de Lyon,  
19 135 Nord-Ouest Villefranche-sur-Saône Hospital, Annecy-Genevois Hospital, Chambéry Hospital, Lyon-  
20 136 Villeurbanne Médipôle).  
21  
22

23  
24 137 Inclusion criteria are: patient aged 70 and over or 60 and over with significant comorbid condition  
25 138 (CIRS-G  $\geq 3$  (22)) or disability (ADL score  $< 6/6$  (23)), histologically or cytologically proven cancer, life  
26 139 expectancy  $> 3$  months planned for a complex medico-surgical procedure in a curative intent. Complex  
27 140 medico-surgical procedures are defined as major abdominal surgery (breast excluded) either minimally  
28 141 invasive or open.  
29

30 142 Exclusion criteria are: patient with other malignancy within the last 5 years (except for adequately  
31 143 treated carcinoma in situ of the cervix or squamous carcinoma of the skin, or adequately controlled  
32 144 limited basal cell skin cancer), unable to be regularly followed for any reason (geographic, familial,  
33 145 social, psychologic) or with any mental or physical handicap at risk of interfering with the appropriate  
34 146 treatment.  
35

36 147 A screening of older patients will be systematically performed during multidisciplinary meetings and  
37 148 described in the CONSORT diagram of the study.  
38  
39

40 149 **Intervention**  
41

42 150 PROADAPT intervention program was built according to a multi-dimensional and multidisciplinary  
43 151 basis. From January 2016 to April 2018, nine regional meetings were organized, gathering 40  
44 152 representatives of the following medical and paramedical specialties: geriatricians, nutritionists,  
45 153 surgeons (subspecialties: gynaecology, digestive surgery, urology), oncologists, anaesthesiologists,  
46 154 nurses, physiotherapists, occupational therapists, adapted physical activity monitors. A systematic  
47 155 review of published data was done in the following axes, in order to provide a graded state-of-the-art:  
48 156 nutrition, physical activity, patient education, medication rationalization, cardiovascular optimization,  
49 157 transition and standardization of surgical procedures. Based on the qualitative grading of existing data,  
50  
51  
52  
53  
54  
55  
56  
57  
58  
59  
60

1  
2  
3 158 a modified DELPHI method was performed, in order to co-validate the content of the standardized  
4  
5 159 intervention checklist, and the feasibility of the implementation of each point of this checklist (Table  
6  
7 160 1).

8  
9 161 A PROADAPT booklet was built, in order to propose a standardized, adapted and evolutive tool  
10  
11 162 designed to explain physical exercise and nutrition counselling and to insure a follow-up of patients'  
12  
13 163 day-to-day achievements. This first version was tested by candidate patients during two turns of  
14  
15 164 validation before the validation of the current version 3 of the booklet.

16 165 PROADAPT standardized geriatric intervention program includes:

- 17  
18 166 - Pre-operative physical activity including strength and endurance exercise +/- group activities  
19  
20 167 during 4 +/-2 weeks. Interventions with high level of evidence were retained, according to an ongoing  
21  
22 168 systematic analysis (<http://www.crd.york.ac.uk/PROSPERO> Ref CRD42020100110; (24,25));  
23  
24 169 - Nutrition: nutrition before and after physical activity, pre-postoperative immuno-nutrition +/-  
25  
26 170 artificial nutrition (ie enteral or parenteral nutrition) according international guidelines (10);  
27  
28 171 - Patient (and caregiver) education and coaching (on nutrition, physical exercise) according to a  
29  
30 172 weekly schedule with the activation of integrated supports by hetero- and self-management (26);  
31  
32 173 - Standardized intervention procedures, according to a checklist established in consensus with  
33  
34 174 surgeons' representatives;  
35  
36 175 - Enhanced rehabilitation will be promoted according to international guidelines (27);  
37  
38 176 - Pharmaceutical medication conciliation, treatment optimization, according a centralized  
39  
40 177 process with pharmaceutical expertise;  
41  
42 178 - Bridging interventions for hospital-to-home transition, according to a proposed standardized  
43  
44 179 procedure including training of dedicated nurses, and post-discharge phone-calls follow-up during 12  
45  
46 180 weeks after surgery. In practice, only 2 or 3 people from the coordination team are in charge of  
47  
48 181 coaching for all patients. In the future, a "special nurse coach" will be trained in each center and  
49  
50 182 responsible of patients' coaching. Interventions with high level of evidence were retained, according  
51  
52 183 to an ongoing systematic analysis (<http://www.crd.york.ac.uk/PROSPERO> Ref CRD42017055698).

53 184 The intervention is designed to be implemented at different times of patients' care (table 1).

54 185

55 186 *During the prehabilitation time:*

- 56 187 • A dedicated nurse, trained in patient education by the coordination team ("coaching nurse")  
57  
58 188 presents him/herself to the patient for:  
59  
60 189 - Presentation of the program to the patient and his/her caregiver(s)  
190  
- Personalization of the PROADAPT booklet (see after) to the patient's characteristics

- 1  
2  
3 191 - Collection of personal data, nutritional and functional habits  
4  
5 192 - Evaluation of psycho-cognitive context using questionnaires (GDS4/GDS15, MNA,  
6 193 MINI-COG)  
7  
8 194 - Gathering of the information needed: comorbidities, comedications (for transmission  
9 to the centralized pharmaceutical expertise)  
10 195  
11 196 - Anticipation and organization of the future appointments (anesthesiologist,  
12 stomatherapist, ...)  
13 197  
14  
15 198 - A weekly visit or phone call according to a structured interview for health education  
16 199 and transmission of nutritional and functional advices (see after)  
17  
18 200 • Nutritional care is based on:  
19  
20 201 - A personalized evaluation of nutritional balance and nutritional needs of the patient  
21 according to dietician diagnosis based on measured intake and international  
22 202 recommendations  
23 203  
24  
25 204 - A weekly follow-up of weight and nutritional intake. If the coaching nurse identifies an  
26 205 unfavorable nutritional trend, she reports it to the referring physician and nutritionist  
27  
28 206 - Artificial nutrition if needed according ESPEN recommendations (10,28,29)  
29  
30 207 - Pre-operative immune-nutrition during 7 days before surgery (29)  
31  
32 208 • Total-body rehabilitation:  
33 209 - 2 to 3 times a week: strength exercise (each time with dedicated exercises for upper  
34 members, legs and abs, 20 to 45 minutes each sequence)  
35 210  
36 211 - 2 to 3 times a week: endurance exercise (walk or cycle ergometer), 20 to 45 min each  
37 212 sequence  
38  
39 213 - 3 times a day: respiratory physiotherapy  
40  
41 214 - Once a week (if possible): group activities (according to the center organization and  
42 215 home-hospital distance)  
43  
44 216 • Pharmaceutical conciliation and optimization according to STOPP/START criteria and  
45 217 international recommendations about peri-operative care (30): to be transmitted to the surgical and  
46 218 anesthesia team without any obligation.  
47  
48  
49 219  
50  
51  
52 220 *During peri-operative time*  
53  
54 221 • The coaching nurse contacts the surgical team for transmission of:  
55 222 o patient's personal data  
56 223 o physical (nutritional, functional and/or comorbidities) as well as psychological  
57 224 difficulties  
58  
59 225 o medication conciliation results  
60

226

227 *During rehabilitation time*

- 228 • The coaching nurse contacts the rehabilitation team for transmission of:
  - 229 o patient's personal data and care course
  - 230 o physical (nutritional, functional and/or comorbidities) as well as psychological
  - 231 difficulties
  - 232 o medication conciliation results
- 233 • The rehabilitation program is left at the discretion of the rehabilitation team (standard care
- 234 and local habits).
- 235 • A weekly phone call of the coaching nurse to the rehabilitation team for nutritional and
- 236 functional follow-up as well as medication conciliation

237

238 *During hospital-home transition time*

- 239 • The coaching nurse contacts the patient's general practitioner for transmission of:
  - 240 o patient's personal data and care course
  - 241 o physical (nutritional, functional and/or comorbidities) as well as psychological
  - 242 difficulties
  - 243 o medication conciliation results
- 244 • Bi-weekly phone call of the coaching nurse to the patient for nutritional and functional follow-
- 245 up
- 246 • Advices for optimization of symptoms management: abdominal pain, nausea, vomiting...

247

**248 Participant timeline**

249 Six successive evaluations are planned for the participants.

250 *The inclusion visit* is planned during a geriatric consultation planned before the start day of the complex  
251 medico-surgical procedure, at least 7 days before start date. If the start date is delayed for any reason  
252 or the patient is included into a neo-adjuvant treatment, the prehabilitation time may be prolonged  
253 until 9 months. In that case, the frequency of the phone calls is decreased (from 1/week to 1/month)  
254 after 4 weeks. During the inclusion visit, lasting about 1 hour, the following steps are planned:

- 255 - Clinic (blood pressure, heart rate, ECOG scale(31), patient's comorbidities), biologic (albumin,  
256 prealbumin, C-reactive protein) and paraclinic (year of birth, gender, weight, height, body  
257 mass index, weight evolution over the last 3 and 6 months) data collection
- 258 - All concomitant treatments and drug conciliation

- 1  
2  
3 259 - The history of the disease (primitive site, metastasis, histology of the initial tumor, presence  
4 of tumor markers)  
5 260  
6 261 - Radiological disease assessments (date and nature)  
7  
8 262 - A standardized geriatric assessment using validated questionnaires with a particular attention  
9 on physical activity and nutrition (ADL(23)/iADL(32), G8 (33), RAPA (34), AIPVQ (35), QLQ-C30  
10 263 (36), QLQ-ED14 (37), EQ-5D-3L (38), SF-36 (39), SPPB (40), FSS (41), MNA (42), GDS4/GDS15  
11 264 (43), MINI-COG (44), Tinetti test (45), Borg scale (46), Pain scale (47), Nutrition scale (48))  
12  
13 265 **(Error! Reference source not found.tables 2 and 3) .**  
14 266  
15 267 - Delivery of the “PROADAPT kit” device during a meeting with a dedicated paramedic (nurse,  
16 268 physiotherapist, ergotherapist...) in order to:  
17  
18 269     ○ Provide to the patient VOLDYNE® and TRIFLO® devices for inspiratory training  
19 270     ○ Present the PROADAPT booklet that includes a battery of exercises and nutritional  
20 271 counselling specifically designed for this older population:  
21  
22 272         ▪ muscle strengthening of upper limbs (6 exercises, 3 difficulty levels), lower  
23 273 limbs (6 exercises, 3 difficulty levels), abdominal wall (4 exercises, 3 difficulty  
24 274 levels) (objective: 2 to 3 sessions per day for a total time between 20 and 45  
25 275 minutes)  
26 276         ▪ endurance/aerobic activities (7 exercises, 3 difficulty levels with 3 duration  
27 277 objectives, objective: every day)  
28 278         ▪ inspiratory training with VOLDYNE® and TRIFLO® devices (objective: 3 sessions  
29 279 per day for a total time of 30 minutes)  
30 280         ▪ general nutritional counselling adapted to the older population: food  
31 281 enrichment, inter-meals collations, oral nutritional supplements.  
32 282     ○ A fulfilling of 3-day food statement allows, in the 7 days after inclusion, to deliver a  
33 283 dietician-driven personalized nutritional counseling. If needed, in case of unfavorable  
34 284 nutritional parameters, artificial nutrition is introduced.  
35  
36 285 - Delivery, if needed, of medical prescription:  
37  
38 286     ○ for home physiotherapy according PROADAPT program for respiratory training  
39 287 sessions and physical activity training sessions  
40 288     ○ For oral nutritional supplements  
41 289     ○ For usual medicines, including pharmaceutical review  
42  
43 290 - For patients requiring inpatient follow-up, hospital admission for a few days in a rehabilitation  
44 291 unit for a physiotherapeutic program and/or artificial nutrition (enteral preferred).  
45  
46  
47  
48  
49  
50  
51  
52  
53  
54  
55  
56  
57  
58  
59  
60

292 During pre-intervention time, phone calls are planned by a dedicated paramedic (once a week for the  
293 first 4 weeks and then once a month until the intervention). Calls are semi-directed interviews focused  
294 on the patient's autonomy, physical activity, appetite and sleep over the last period (week/month). A  
295 special attention is paid on encouraging patient's motivation and adherence to the program.

296 *The pre-therapeutic visit* is scheduled when possible between 5 days and the day of the intervention.  
297 This visit is performed in the surgery or radiotherapy unit only if the visit is necessary before the  
298 intervention still without modifying the standard therapeutic care for:

- 299 - Clinic, biologic and paraclinic data collection
- 300 - All concomitant treatments and drug conciliation
- 301 - Questionnaires about pain, nutrition, fitness and physical tests (table 2 and 3)
- 302 - Therapeutic care data collection (date, nature, entitled, reason)

303 During post-intervention time, paramedics trained in clinical research will resume follow-up calls as  
304 before the intervention once a week during 12 weeks after D0 and once a month up to 12 months after  
305 D0. The D0 date is determined as the last day of surgery (day of the last resumption of surgery in the  
306 limit of 30 days after the first intervention) or the last day of the radiotherapy. For weekly calls, a  
307 margin of +/- 2 days is allowed and for monthly calls, a margin of +/- 7 days is allowed.

308 *Visits at 1, 3 and 6 months after the intervention (+/- 7 days):* The patient may have started an  
309 antineoplastic treatment according to standard of care. The visit could be performed with the surgeon,  
310 the radiotherapist or the oncologist according local habits:

- 311 - Clinic (blood pressure, heart rate, ECOG scale(31)), biologic (albumin, prealbumin, C-reactive  
312 protein) and paraclinic (weight, body mass index) data collection
- 313 - All concomitant treatments and drug conciliation
- 314 - Patient care data (surgery and complications, treatment for the cancer)
- 315 - Radiological disease assessments (date and nature)
- 316 - Questionnaires about quality of life, pain, nutrition, fitness and physical tests (table 2 and 3)
- 317 - Socio-economic assessment with patient's care data (date, nature of acts, designation, reason)

318 *The end of study visit* is planned at 12 months (per-protocol) or at the date of trial premature  
319 discontinuation (+/- 7 days) for a final assessment of the same outcomes as previously listed. When  
320 requested, if previous visits were omitted, a final assessment of all the complications during the post-  
321 therapeutic period is performed.

## 322 **Outcomes and measurements**



1  
2  
3 323 **Primary outcome**  
4

5 324 The main outcome measure will be the percentage of patients who have completed at least one item  
6  
7 325 in the PROADAPT program after 12 months after the start of therapeutic treatment. The start of  
8  
9 326 treatment is defined in this study by the last day of surgery (date of the last recovery within the limit  
10  
11 327 of 30 days after the date of the initial intervention) or the last day of radiotherapy. The workshops of  
12  
13 328 the program are:

- 14 329 - Physical and respiratory rehabilitation
- 15 330 - Re-nutrition session
- 16  
17 331 - Telephone nurse follow-up  
18

19 332

20 333

21 334 **Secondary outcomes**  
22  
23

24 335 The secondary outcomes of the study are:  
25

26  
27 336 - To evaluate the feasibility of each stage of the program independently of each other (rate of  
28  
29 337 achievement of all or part of the instructions)

30 338 ○ Pre-operative physical rehabilitation including (figure 1):

- 31  
32 339 • Muscle strengthening
- 33  
34 340 • Respiratory rehabilitation
- 35  
36 341 • Endurance work

37 342 ○ Pre-operative nutrition counselling (figure 1)

38 343 ○ Drug reconciliation / iatrogenic prevention

39 344 ○ Pre-therapeutic follow-up calls

40 345 ○ Post-surgery or post-radiotherapy follow-up calls  
41  
42  
43  
44 346

45 347 - To estimate patients' satisfaction with the overall program, at the end of the study (end of follow-up  
46  
47 348 or study discontinuation) using a questionnaire (Supplemental material).

48  
49 349 - To estimate the rate of adherence to the items (physical activity, nutrition and nursing follow-up)  
50  
51 350 during follow-up time. To evaluate this criterion, various parameters will be recorded: physical activity  
52  
53 351 duration (in h/week), kinetics (duration (% increase), level of difficulty), respiratory activity, food intake  
54  
55 352 during phone calls.

56  
57 353 - To assess the longitudinal evolution over 1 year of:

- 58 354 ○ patient's physical performance (SPPB, gait speed, TUG test) and functional independence on  
59  
60 355 ADL (23), IADL (32), AIPVQ (49)

- 356 ○ nutritional parameters of the patient (weight, albuminemia, appetite)
- 357 ○ health-related quality of life for patients based on QLQ-C30 and ELD14 (5 dimensions: mobility,
- 358 disease burden, emotional and physical functioning, tiredness) (50,51)
- 359 ○ pharmaceutical conciliation

360

361 In parallel to these secondary objectives, a series of parameters will be measured and monitored in  
362 order to:

- 363 - Estimate the rate and nature of post-operative complications at 30 days (NCI-CTCAE)
- 364 - Estimate the rate and nature of post-operative complications according to the CCI at 30 and 90 days
- 365 - Estimate post-operative mortality at 30 and 90 days
- 366 - Estimate the overall one-year survival rate (OS)
- 367 - Estimate the one-year progression-free survival rate (PFS)
- 368 - Estimate the longitudinal evolution of QoL according to QLQ C30, ELD14, EQ-5D
- 369 - Estimate treatment costs (health system, patients)
- 370 - Study therapeutic strategies (treatment completion rate)
- 371 - Estimate the evolution of geriatric covariates.

372

### 373 **Sample size calculation**

374 The program will be considered feasible, at the patient level, if all or part of the program is  
375 implemented in at least 50 % of the included patients (= alternative hypothesis). This threshold was  
376 defined in line with previous studies on prehabilitation for older cancer patients, that showed  
377 compliance rates between 16 and 95% (52,53). Considering that PROADAPT program is highly complex  
378 even if tailored for older patients, we anticipate modest compliance rates.

379 The calculation of the number of subjects needed was done as follows: to reject the null hypothesis of  
380 the program feasibility rate lower than 35 %, with a first alpha species risk of 5 % and a power of 90 %  
381 (beta=10 %, bilateral test), the number of subjects to be analyzed is 111. Including 10 % non-treatable  
382 patients, a total of 122 patients should be included. The included patients will be analyzed with  
383 intention-to-treat.

### 384 **Data management and statistical analyses**

385 Data are monitored by a clinical research associate (CRA). Inconsistencies will be reported to the study  
386 investigators in order to decide whether the data should be corrected or considered as missing data.  
387 Any changes in the data will be reported.

1  
2  
3 388 Data analyses will be performed by the data management and analysis centre. The analyses will be  
4  
5 389 carried out by an independent statistician with the latest version of the R software environment.  
6  
7 390 All of the characteristics collected will be subjected to a descriptive analysis.  
8  
9 391

### 392 ***Descriptive analyses***

10  
11  
12  
13 393 A flow-chart diagram will describe the data available for the patient population at baseline, and during  
14  
15 394 each follow-up visit. Eligibility criteria for treated patients will be verified, as well as follow-up and end  
16  
17 395 of study visits. Reasons for premature end of study will be provided.

18  
19 396 Characteristics of the study population and proportions of missing values will be reported. Patient  
20  
21 397 characteristics will be described using mean and standard deviation or median and interquartile range  
22  
23 398 for quantitative variables, and frequencies and distribution for categorical variables. A comparison of  
24  
25 399 baseline characteristics between patients with complete follow-up and those with attrition will be  
26  
27 400 performed. If needed, methods for handling missing data (multiple imputation, mixed model or  
28  
29 401 auxiliary variable) will be used when appropriate.  
30  
31 402

### 31 403 ***Primary analysis***

32  
33 404 The percentage of patients who have completed at least one PROADAPT program activity at the end  
34  
35 405 of 12 months after the start of treatment will be estimated using mean and standard deviation.

### 36 37 406 ***Secondary analyses***

#### 38 39 407 **Time-to-event variables: follow-up, overall survival, progression free survival**

40  
41  
42 408 The proportion of events at specific measurement times will be estimated according to the Kaplan-  
43  
44 409 Meier curve. Medians of event-free survival will be reported by treatment arm with its 95 % confidence  
45  
46 410 interval (95 % CI), if the number of events allows estimation of the median.

47  
48 411 Overall survival rate and progression free survival rate at 12 months (after the day of the last revision  
49  
50 412 of surgery or the last day of radiotherapy) will be provided with 95 % CI.

### 51 413 **Quality of life**

52  
53  
54 414 Analyses of the QoL data will be performed with modified intention to treat (mITT): all included  
55  
56 415 patients, regardless of compliance with the eligibility criteria and whether or not they were followed  
57  
58 416 up and for whom the QoL scores at inclusion will be included in the analysis. Patients' quality of life,  
59  
60

1  
2  
3 417 linked to health, will be analysed after 3 months through 5 dimensions: mobility, disease burden,  
4  
5 418 emotional and physical functioning, tiredness.  
6

7 419

#### 8 9 420 ***Data monitoring***

10  
11 421 The successful completion of the database is ensured by the hospital CRA. The hospital CRA also  
12  
13 422 ensures compliance with the study protocol. The sponsor CRA verifies that the rights of the participants  
14  
15 423 are respected.  
16

16 424

#### 17 18 425 ***End of protocol***

19  
20 426 Patients leave the study either on a per-protocol basis during the “end of study visit” on month 12  
21  
22 427 after the intervention or at any time during the conduct of the study if they no longer wish to  
23  
24 428 participate. However, as indicated in the information letter to the patients/caregivers, the data  
25  
26 429 collected before exclusion may be used as part of the study.  
27

27 430

#### 28 29 431 ***Confidentiality***

30  
31 432 Correspondence tables will be kept in a separate file that does not contain clinical data. The access to  
32  
33 433 the nominative information is protected by a password and confidentiality is guaranteed by the study.  
34

34 434

#### 35 36 435 ***Protocol amendments***

37  
38 436 Any important modifications requiring a new ethics committee approval will be communicated in  
39  
40 437 future publications. Any potential impact of protocol modifications on the results will be discussed as  
41  
42 438 appropriate.  
43

43 439

#### 44 45 440 ***Trial status***

46  
47 441 Patient enrolment began on July 3, 2018. Data are collecting.  
48

49 442

#### 50 51 443 ***Patients' and public involvement***

52  
53 444 Patients were involved at different steps of the trial: (i) during PROADAPT booklet conception, several  
54  
55 445 (30) patients were asked to answer an anonymous questionnaire in order to improve its ergonomics;  
56  
57 446 (ii) the information note and consent form of the protocol have been re-read by the patients' review  
58  
59 447 committee of the Ligue Nationale de Lutte contre le Cancer (a French association of cancer patients).  
60

60 448

## 449 **Discussion**

### 450 **Discussion of the intervention**

451 Prehabilitation has long been conceptualized as an effective means of improving the functional  
452 capacity of the individual to enable him to resist various stressors. Originally developed in the military  
453 as the association of physical training to improve strength and endurance, improving nutritional intake  
454 and general education (54), it has been transposed into medicine and major surgery – initially when  
455 an ICU admission is planned - at the beginning of this century (55).

456 Despite a growing interest in the medical community for prehabilitation and particularly cancer  
457 prehabilitation, the level of evidence for specific interventions stays too low to be implemented in  
458 common care. Among the main disadvantages of published data include the heterogeneity of  
459 programs, sometimes poor patient adherence and the fact that most studies were small pilot studies  
460 developed for patients more fit and younger than those who should make the best part of  
461 prehabilitation. Another point to emphasize is that most programs include only one intervention -  
462 physical, nutritional, or psychological rehabilitation - when multimodal interventions are often  
463 considered to be more effective in older populations.

464 Considering these points, the PROADAPT intervention was developed according to an innovative  
465 management strategy since it started in 2016 by multi-professional meetings conceived as  
466 brainstorming sessions in order to develop a multidisciplinary program dedicated to prehabilitation  
467 and follow-up of older patients. The multidisciplinary conception of the intervention, the particular  
468 attention paid to older patients' specificities and the previous experience of the participants in as  
469 various fields as patients' education, cognition, physiotherapy were hopefully the warrants of the most  
470 tailored approach to the target population. For example, the booklet typography was of big character  
471 font and the illustrations highly schematic with high contrast. Each sentence was verified by a panel of  
472 patients in order to insure proper understanding. Finally, the booklet was evaluated by 30 patients,  
473 with a high rate of satisfaction (Ravot et al, PROADAPT Pilot trial: A survey on patients' expectations  
474 and satisfaction, unpublished data).

475 This pilot study is the first step towards an ambitious program, since PROADAPT program will be  
476 declined in the future into two randomized studies, PROADAPT-ovary/EWOC-2 (NCT04284969) and  
477 PROADAPT sus-mesocolic, designed to evaluate the impact of PROADAPT program on post-treatment  
478 complications versus common care. In order to favor patients' compliance and follow-up, an eHealth  
479 tool has been developed that will help supervising patients' care courses.

### 480 **Discussion of the study design**

1  
2  
3 481 In line with the previous points, this pilot study was designed in order to answer to this critical  
4 question: is a multidomain prehabilitation program feasible in an older cancer population? This  
5 482 question encompasses several points: (i) Is the program physically adapted to an older population? (ii)  
6 483 Is such a program applicable in ambulatory care? (iii) How to build pedagogic tools adapted for such  
7 ambulatory use? (iv) Are such pedagogic tools understandable? (v) What is the compliance of the  
8 484 patients for each domain of the intervention program?... Another point is to know whether the  
9 patient's care team is expected to accept such intervention, but this point was previously evaluated by  
10 485 Ghignone et al. They demonstrated through an international survey that surgeons are generally in  
11 486 favor for such programs since 71 % of them would accept to prehabilitate their elderly patients 4 weeks  
12 before surgery, if such intervention is proven to be effective (2). Nevertheless, the participation of  
13 487 surgeons and anesthesiologists during initial brainstorming sessions was of major interest since they  
14 enriched a lot the structure of the program.  
15  
16  
17  
18  
19  
20  
21  
22

23  
24 493 Thus, the construct of this trial may appear as highly complex with overabundant secondary endpoints,  
25 but this design encompasses as much as possible the complexity of prevention care in an older  
26 494 population, which has to mix the adaptation to the target population and the ability to maintain  
27 495 compliance over time.  
28  
29  
30  
31  
32

33 497

### 34 498 **Ethics and dissemination**

35  
36 499 The study sponsor is the Hospices Civils de Lyon, responsible for study insurance and  
37 pharmacovigilance. The study protocol was approved by the Ile de France 8 Ethics Committee on May  
38 500 3, 2018 and cover all sites involved in this study. Several amendments have been added to the first  
39 501 version of the protocol. The initial approved version was V2 of May 28, 2018, then the amended  
40 502 versions were as follows: V3 of October 23, 2018 (change in the recruitment period, addition of new  
41 503 investigation centers), V4 of May 17, 2019 (request for an additional 12 months extension, update with  
42 504 the GDPR and update of the patient booklet), V5 of July 17, 2020 (addition of a cohort of 30 patients  
43 505 to test the follow-up program with an e-health interface, request for an additional 8 months  
44 506 extension). Current version is the V5 of July 17, 2020, authorized on September 10, 2020. The research  
45 507 will be carried out on accordance with the Helsinki Declaration and ICH GCP Guidelines. Trial protocol  
46 508 fulfills SPIRIT 2013 checklist (Supplementary table 1) and World Health Organization Trial Registration  
47 509 Data Set (Supplementary table 2). The study complies with the principles of the data protection act in  
48 510 France and with the General Data Protection Regulations in force in Europe. Each investigator must  
49 511 collect a written consent at the beginning of the procedure. This consent is retained in the patient's  
50 512 medical chart. The patient can stop the study at any time with an oral information at his investigator  
51  
52  
53  
54  
55  
56  
57  
58  
59  
60 513

1  
2  
3 514 or clinical research assistant. Patients will be informed on additional amendments according the law  
4  
5 515 in force.

6  
7 516 The results of the primary and secondary objectives will be published in peer-reviewed journals. All  
8  
9 517 authors of future publications will have to meet the criteria for authorship stated in the Uniform  
10  
11 518 Requirements for Manuscripts Submitted to Biomedical Journals by the International Committee of  
12  
13 519 Medical Journal Editors.

14 520

15 521 Total words count : 4791

16  
17  
18 522

19  
20 523 **Abbreviations**

21  
22 524 ADL: Activities of Daily Living; AIPVQ: Physical Instrumental activities of daily living (in French: Activités  
23  
24 525 Instrumentales Physiques de la Vie Quotidienne); CRA: Clinical Research Assistant; ESPEN: European  
25  
26 526 Society for Clinical Nutrition and Metabolism; FSS: Fatigue Severity Scale; GDS: Geriatric Depression  
27  
28 527 Scale; IADL: Instrumental Activities of Daily Living; ICU: Intensive Care Unit; mITT:Modified Intention  
29  
30 528 To Treat; MNA: Mini Nutritional Assessment; QLQ: Quality of Life Questionnaire; QoL: Quality of Life;  
31  
32 529 RAPA: Rapid Assessment of Physical Activity; SF: Short Form; SPPB: Short Physical Performance Battery

33  
34 530

35  
36 531 **Declarations**

37  
38 532

39  
40 533 **Acknowledgements**

41  
42  
43 534 This pilot protocol is part of the PROADAPT initiative for improving care for older people with cancer.  
44  
45 535 The authors wish to thank the professionals who participated to the intervention conception: G.  
46  
47 536 Albrand, D. Barnoud, D. Benayoun. B Billod, J. Bonhomme, A.-L. Bres, C. Brunengo, A. Chanelière, D.  
48  
49 537 Charley, Y. Chauleur, G. Copaescu, H. Curé, A.-M. Dascalita, B. De La Vigerie, S. Ducoulombier, , O.  
50  
51 538 Ganne, F. Gervais, T. Gilbert, M. Giroud, N. Jomard, C. Lecardonnell, B. Leroy, J.-A. Long, A. Marion, E.  
52  
53 539 Nony, S. Parent, A. Pelisset-Vanhersecke, A. Pirollet, , J.-E. Terrier, J. Trautmann, M.-A. Vincent.

54  
55 540 The authors also acknowledge the teams of Lyon Sud Hospital, Edouard Herriot Hospital of Lyon, Croix  
56  
57 541 Rouse Hospital of Lyon, Annecy Genevois Hospital Center, Hôpital Nord Ouest hospital center,  
58  
59 542 Chambéry Hospital Center and Médipôle Lyon-Villeurbanne who contribute to patient enrollment in  
60  
543 this study.

1  
2  
3 544 The authors would like to thank in particular the patients' review committee of the Ligue Nationale de  
4  
5 545 Lutte contre le Cancer for the valuable editing of the information note and the consent form.

6  
7 546 **Funding**  
8

9 547 This work was supported by the Agence Régionale de Santé (ARS) Auvergne Rhône Alpes, through the  
10  
11 548 call for projects "Innovate in health for the Auvergne Rhône Alpes region" jointly organized by the ARS,  
12  
13 549 Bpifrance, the Auvergne Rhône Alpes region, URIOPASS, ORAIDA and Cluster I-care and the decision of  
14  
15 550 the selection committee on June 27, 2016 (Grant N°2016-149 (63)). It provided funding for nurses,  
16  
17 551 dieticians, physiotherapists, and clinical research assistants.

18  
19 552 **Availability of data and materials**

20  
21 553 The final dataset of the PROADAPT pilot study will be available on reasonable request after publication  
22  
23 554 of the primary objective. Data requests can be submitted to the corresponding author.

24  
25 555 **Competing interest**

26  
27 556 The authors declare that they have no competing interests.

28  
29 557 **Consent for publication**

30  
31  
32 558 Not applicable

33  
34 559 **Author contributions**

35  
36 560 All authors participated to the PROADAPT intervention conception. Study protocol was conceived by  
37  
38 561 DD, CF, CG, OLS, AM, VP and CR. DD and CF assumed fundraising and grant follow-up. MR led the  
39  
40 562 drafting of the manuscript. All authors (MR, CR, AM, CG, VP, MT, BR, BG, MG, CBa, CBo, EG, LS, MH,  
41  
42 563 ECK, IMS, VC, OLS, DD and CF) critically reviewed and approved the final version of the protocol.

43  
44 564  
45  
46  
47  
48  
49  
50  
51  
52  
53  
54  
55  
56  
57  
58  
59  
60



565 **References**

- 566 1. Tan H-J, Saliba D, Kwan L, Moore AA, Litwin MS. Burden of Geriatric Events Among Older Adults  
567 Undergoing Major Cancer Surgery. *J Clin Oncol*. 2016 Oct 4;34(11):1231–8.
- 568 2. Ghignone F, van Leeuwen BL, Montroni I, Huisman MG, Somasundar P, Cheung KL, et al. The  
569 assessment and management of older cancer patients: A SIOG surgical task force survey on surgeons'  
570 attitudes. *Eur J Surg Oncol EJSO*. 2016 Feb;42(2):297–302.
- 571 3. Thomas G, Tahir MR, Bongers BC, Kallen VL, Slooter GD, van Meeteren NL. Prehabilitation before  
572 major intra-abdominal cancer surgery: A systematic review of randomised controlled trials. *Eur J*  
573 *Anaesthesiol*. 2019;36(12):933–45.
- 574 4. Carli FMMp, Bousquet-Dion G, Awasthi R, Elsherbini N, Liberman S, Boutros M, et al. Effect of  
575 Multimodal Prehabilitation vs Postoperative Rehabilitation on 30-Day Postoperative Complications for  
576 Frail Patients Undergoing Resection of Colorectal Cancer: A Randomized Clinical Trial. *JAMA Surg*.  
577 2020 Mar;155(3):233–42.
- 578 5. Bongers BC, Klaase JM, Meeteren NLU van. Prehabilitation vs Postoperative Rehabilitation for Frail  
579 Patients. *JAMA Surg*. 2020 Sep 1;155(9):896–7.
- 580 6. Cooper L, Frain L, Jaklitsch MT. Prehabilitation vs Postoperative Rehabilitation for Frail Patients. *JAMA*  
581 *Surg*. 2020 Sep 1;155(9):898–9.
- 582 7. Kako JMhsRO, Kajiwara K, Tatematsu N. Prehabilitation vs Postoperative Rehabilitation for Frail  
583 Patients. [Letter]. *JAMA Surg*.
- 584 8. Keller DS, Carter B, Moug SJ. Prehabilitation vs Postoperative Rehabilitation for Frail Patients. *JAMA*  
585 *Surg*. 2020 Sep 1;155(9):896–896.
- 586 9. Carli F, Bousquet-Dion G, Fiore JF. Prehabilitation vs Postoperative Rehabilitation for Frail Patients.  
587 *JAMA Surg*. 2020 Sep 1;155(9):899–900.
- 588 10. Arends J, Bachmann P, Baracos V, Barthelemy N, Bertz H, Bozzetti F, et al. ESPEN guidelines on  
589 nutrition in cancer patients. *Clin Nutr [Internet]*. 2016 Aug 6 [cited 2016 Nov 20];0(0). Available from:  
590 [http://www.clinicalnutritionjournal.com/article/S0261-5614\(16\)30181-9/abstract](http://www.clinicalnutritionjournal.com/article/S0261-5614(16)30181-9/abstract)
- 591 11. Singh F, Newton RU, Galvão DA, Spry N, Baker MK. A systematic review of pre-surgical exercise  
592 intervention studies with cancer patients. *Surg Oncol*. 2013 Jun 1;22(2):92–104.
- 593 12. Craig P, Dieppe P, Macintyre S, Michie S, Nazareth I, Petticrew M. Developing and evaluating complex  
594 interventions: the new Medical Research Council guidance. *BMJ*. 2008 Sep 29;337:a1655.
- 595 13. Ferlay J, Soerjomataram I, Ervik M, Dikshit R, Eser S, Mathers C, et al. GLOBOCAN 2012 v1.0, Cancer  
596 Incidence and Mortality Worldwide: IARC CancerBase No. 11 [Internet] [Internet]. Lyon, France:  
597 International Agency for Research on Cancer; 2013 [cited 2016 Sep 4]. Available from: Available from:  
598 <http://globocan.iarc.fr>
- 599 14. Koene RJ, Prizment AE, Blaes A, Konety SH. Shared Risk Factors in Cardiovascular Disease and Cancer.  
600 *Circulation*. 2016 Mar 15;133(11):1104–14.
- 601 15. Sjölund B-M, Wimo A, Qiu C, Engström M, von Strauss E. Time trends in prevalence of activities of  
602 daily living (ADL) disability and survival: Comparing two populations (aged 78+ years) living in a rural  
603 area in Sweden. *Arch Gerontol Geriatr*. 2014 May;58(3):370–5.
- 604 16. Sjölund B-M, Wimo A, Engström M, Strauss E von. Incidence of ADL Disability in Older Persons,  
605 Physical Activities as a Protective Factor and the Need for Informal and Formal Care – Results from the  
606 SNAC-N Project. *PLoS ONE [Internet]*. 2015 [cited 2016 Sep 4];10(9). Available from: [https://www-](https://www.ncbi.nlm.nih.gov/pubmed/26144444)  
607 [ncbi.nlm.nih.gov/pubmed/26144444](https://www.ncbi.nlm.nih.gov/pubmed/26144444)

- 1  
2  
3 608 17. Jagger C, Gillies C, Moscone F, Cambois E, Van Oyen H, Nusselder W, et al. Inequalities in healthy life  
4 609 years in the 25 countries of the European Union in 2005: a cross-national meta-regression analysis. *The*  
5 610 *Lancet*. 2008 Dec 20;372(9656):2124–31.
- 6  
7 611 18. Extermann M, Meyer J, McGinnis M, Crocker TT, Corcoran MB, Yoder J, et al. A comprehensive  
8 612 geriatric intervention detects multiple problems in older breast cancer patients. *Crit Rev Oncol Hematol*.  
9 613 2004 Jan;49:69–75.
- 10  
11 614 19. Repetto L, Fratino L, Audisio RA, Venturino A, Gianni W, Vercelli M, et al. Comprehensive geriatric  
12 615 assessment adds information to Eastern Cooperative Oncology Group performance status in elderly cancer  
13 616 patients: an Italian Group for Geriatric Oncology Study. *J Clin Oncol*. 2002 Jan 15;20:494–502.
- 14  
15 617 20. Caillet P, Canoui-Poitrine F, Vouriot J, Berle M, Reinald N, Krypciak S, et al. Comprehensive geriatric  
16 618 assessment in the decision-making process in elderly patients with cancer: ELCAPA study. *J Clin Oncol*.  
17 619 2011;29:3636–42.
- 18  
19 620 21. Website: [http://www.cepd.fr/CUSTOM/CEPD\\_toxicite.pdf](http://www.cepd.fr/CUSTOM/CEPD_toxicite.pdf).
- 20  
21 621 22. Linn BS, Linn MW, Gurel L. CUMULATIVE ILLNESS RATING SCALE. *J Am Geriatr Soc*. 1968  
22 622 May;16(5):622–6.
- 23  
24 623 23. Katz S, Ford AB, Moskowitz RW, Jackson BA, Jaffe MW. Studies of Illness in the Aged. The Index of  
25 624 Adl: A Standardized Measure of Biological and Psychosocial Function. *Jama*. 1963 Sep 21;185:914–9.
- 26  
27 625 24. Falandry C, Stefani L, Granger M, Momiron C, Habchi H, Bourgeois C, et al. Interventions to improve  
28 626 physical performances of older people with cancer before major surgery: an umbrella review. *J Geriatr*  
29 627 *Oncol*. 2018;9(6 suppl 1):S94–5.
- 30  
31 628 25. Falandry C, Stefani L, André L, Granger M, Barbarava C, Habchi H, et al. Interventions to improve  
32 629 physical performances of older people with cancer before complex medico-surgical procedures: protocol  
33 630 for an umbrella review of systematic reviews and meta-analyses. *Medicine (Baltimore)*. 2020;
- 34  
35 631 26. Glasgow RE, Emmons KM. How Can We Increase Translation of Research into Practice? Types of  
36 632 Evidence Needed. *Annu Rev Public Health*. 2007;28(1):413–33.
- 37  
38 633 27. Colburn JL, Mohanty S, Burton JR. Surgical Guidelines for Perioperative Management of Older Adults:  
39 634 What Geriatricians Need to Know. *J Am Geriatr Soc*. 2017 Jun 1;65(6):1339–46.
- 40  
41 635 28. Arends J, Bodoky G, Bozzetti F, Fearon K, Muscaritoli M, Selga G, et al. ESPEN Guidelines on Enteral  
42 636 Nutrition: Non-surgical oncology. *Clin Nutr*. 2006 Apr;25(2):245–59.
- 43  
44 637 29. Weimann A, Braga M, Harsanyi L, Laviano A, Ljungqvist O, Soeters P, et al. ESPEN Guidelines on  
45 638 Enteral Nutrition: Surgery including Organ Transplantation. *Clin Nutr*. 2006 Apr;25(2):224–44.
- 46  
47 639 30. Mohanty S, Rosenthal RA, Russell MM, Neuman MD, Ko CY, Esnaola NF. Optimal Perioperative  
48 640 Management of the Geriatric Patient: A Best Practices Guideline from the American College of Surgeons  
49 641 NSQIP and the American Geriatrics Society. *J Am Coll Surg*. 2016 May 1;222(5):930–47.
- 50  
51 642 31. Oken MM, Creech RH, Tormey DC, Horton J, Davis TE, McFadden ET, et al. Toxicity and response  
52 643 criteria of the Eastern Cooperative Oncology Group. *Am J Clin Oncol*. 1982 Dec;5(6):649–55.
- 53  
54 644 32. Lawton MP, Brody EM. Assessment of older people: self-maintaining and instrumental activities of daily  
55 645 living. *Gerontologist*. 1969 Autumn;9:179–86.
- 56  
57 646 33. Bellera CA, Rainfray M, Mathoulin-Pélissier S, Mertens C, Delva F, Fonck M, et al. Screening older  
58 647 cancer patients: first evaluation of the G-8 geriatric screening tool. *Ann Oncol*. 2012 Aug;23(8):2166–72.
- 59  
60 648 34. Topolski TD, LoGerfo J, Patrick DL, Williams B, Walwick J, Patrick MB. The Rapid Assessment of  
61 649 Physical Activity (RAPA) among older adults. *Prev Chronic Dis*. 2006 Oct;3(4):A118.

- 1  
2  
3 650 35. Gill TM, Baker DI, Gottschalk M, Peduzzi PN, Allore H, Van Ness PH. A prehabilitation program for the  
4 651 prevention of functional decline: effect on higher-level physical function. *Arch Phys Med Rehabil.* 2004  
5 652 Jul;85(7):1043–9.
- 6  
7 653 36. Quinten C, Coens C, Ghislain I, Zikos E, Sprangers MAG, Ringash J, et al. The effects of age on health-  
8 654 related quality of life in cancer populations: A pooled analysis of randomized controlled trials using the  
9 655 European Organisation for Research and Treatment of Cancer (EORTC) QLQ-C30 involving 6024 cancer  
10 656 patients. *Eur J Cancer.* 2015 Dec;51(18):2808–19.
- 11  
12 657 37. Wheelwright S, Darlington A-S, Fitzsimmons D, Fayers P, Arraras JI, Bonnetain F, et al. International  
13 658 validation of the EORTC QLQ-ELD14 questionnaire for assessment of health-related quality of life  
14 659 elderly patients with cancer. *Br J Cancer.* 2013 Aug;109(4):852–8.
- 15  
16 660 38. Janssen MF, Pickard AS, Golicki D, Gudex C, Niewada M, Scalone L, et al. Measurement properties of  
17 661 the EQ-5D-5L compared to the EQ-5D-3L across eight patient groups: a multi-country study. *Qual Life*  
18 662 *Res.* 2013 Sep;22(7):1717–27.
- 19  
20 663 39. Ware JE, Sherbourne CD. The MOS 36-item short-form health survey (SF-36). I. Conceptual framework  
21 664 and item selection. *Med Care.* 1992 Jun;30(6):473–83.
- 22  
23 665 40. Fish J. Short Physical Performance Battery. In: Kreutzer JS, DeLuca J, Caplan B, editors. *Encyclopedia of*  
24 666 *Clinical Neuropsychology* [Internet]. New York, NY: Springer New York; 2011 [cited 2020 Nov 4]. p.  
25 667 2289–91. Available from: [http://link.springer.com/10.1007/978-0-387-79948-3\\_1832](http://link.springer.com/10.1007/978-0-387-79948-3_1832)
- 26  
27 668 41. Goo A-J, Song Y-M, Shin J, Ko H. Factors Associated with Depression Assessed by the Patient Health  
28 669 Questionnaire-2 in Long-Term Cancer Survivors. *Korean J Fam Med.* 2016;37(4):228.
- 29  
30 670 42. Guigoz Y, Vellas B, Garry PJ. Assessing the Nutritional Status of the Elderly: The Mini Nutritional  
31 671 Assessment as Part of the Geriatric Evaluation. *Nutr Rev.* 2009 Apr 27;54(1):S59–65.
- 32  
33 672 43. Yesavage JA, Brink TL, Rose TL, Lum O, Huang V, Adey M, et al. Development and validation of a  
34 673 geriatric depression screening scale: A preliminary report. *J Psychiatr Res.* 1982 Jan;17(1):37–49.
- 35  
36 674 44. McCarten JR, Anderson P, Kuskowski MA, McPherson SE, Borson S. Screening for Cognitive  
37 675 Impairment in an Elderly Veteran Population: Acceptability and Results Using Different Versions of the  
38 676 Mini-Cog: SCREENING ELDERLY VETERANS USING THE MINI-COG. *J Am Geriatr Soc.* 2011  
39 677 Feb;59(2):309–13.
- 40  
41 678 45. Tinetti ME, Baker DI, McAvay G, Claus EB, Garrett P, Gottschalk M, et al. A Multifactorial Intervention  
42 679 to Reduce the Risk of Falling among Elderly People Living in the Community. *N Engl J Med.* 1994 Sep  
43 680 29;331(13):821–7.
- 44  
45 681 46. Borg G. Perceived exertion as an indicator of somatic stress. *Scand J Rehabil Med.* 1970;2(2):92–8.
- 46  
47 682 47. Agence Nationale d'Accréditation et d'Evaluation en Santé (ANAES). Assessment and follow-up of  
48 683 chronic pain in adults in ambulatory medicine. 1999 Feb;
- 49  
50 684 48. Société Francophone Nutrition Clinique et Métabolisme (SFNCM). Evaluation of food intake.
- 51  
52 685 49. de Souto Barreto P, Ferrandez A-M. Activités instrumentales physiques de la vie quotidienne chez les  
53 686 personnes âgées: validation d'une échelle. In: *L'anthropologie du vivant: objets et méthodes.* Chapuis-  
54 687 Lucciani N, Guihard-Costa AM, Boëtsch G. 2010. p. 83–7.
- 55  
56 688 50. Aaronson NK, Ahmedzai S, Bergman B, Bullinger M, Cull A, Duez NJ, et al. The European Organization  
57 689 for Research and Treatment of Cancer QLQ-C30: A Quality-of-Life Instrument for Use in International  
58 690 Clinical Trials in Oncology. *JNCI J Natl Cancer Inst.* 1993 Mar 3;85(5):365–76.
- 59  
60 691 51. Wheelwright S, Darlington A-S, Fitzsimmons D, Fayers P, Arraras JI, Bonnetain F, et al. International  
61 692 validation of the EORTC QLQ-ELD14 questionnaire for assessment of health-related quality of life  
62 693 elderly patients with cancer. *Br J Cancer.* 2013 Aug 20;109(4):852–8.

- 1  
2  
3 694 52. Boereboom C, Doleman B, Lund JN, Williams JP. Systematic review of pre-operative exercise in  
4 695 colorectal cancer patients. *Tech Coloproctology*. 2016 Feb 1;20(2):81–9.  
5  
6 696 53. Sun V, Raz DJ, Kim JY, Melstrom L, Hite S, Varatkar G, et al. Barriers and facilitators of adherence to a  
7 697 perioperative physical activity intervention for older adults with cancer and their family caregivers. *J*  
8 698 *Geriatr Oncol*. 2020 Mar 1;11(2):256–62.  
9  
10 699 54. Prehabilitation, rehabilitation, and revocation in the Army. *Br Med J*. 1946 Jun 29;1:192–7.  
11  
12 700 55. Topp R, Ditmyer M, King K, Doherty K, Hornyak J. The effect of bed rest and potential of prehabilitation  
13 701 on patients in the intensive care unit. *AACN Clin Issues*. 2002 May;13(2):263–76.  
14  
15 702  
16  
17 703

For peer review only

1  
2  
3 704 **Illustrations' legends**  
4

5  
6 705 Figure 1: PROADAPT program: interventions at the patient's level

7 706 Table 1: PROADAPT program: tasks according the different domains and the successive chronological  
8 707 steps (before, during and after complex medico-surgical procedure)

9  
10 708 Table 2: PROADAPT pilot trial: questionnaires and screening tests

11  
12 709 Table 3: PROADAPT pilot trial: flow diagram

13  
14 710

15  
16 711

17  
18  
19  
20  
21  
22  
23  
24  
25  
26  
27  
28  
29  
30  
31  
32  
33  
34  
35  
36  
37  
38  
39  
40  
41  
42  
43  
44  
45  
46  
47  
48  
49  
50  
51  
52  
53  
54  
55  
56  
57  
58  
59  
60

For peer review only

712 Table 1: PROADAPT program: tasks according the different domains and the successive chronological  
713 steps (before, during and after complex medico-surgical procedure)

|                                                      |                                                                                                                                                                                                                                                                                                                                                                                                                                                                                                                                                                                               |                                                                                                                                                                                                                                                                                                                                                                                                                                                                                                                                                                                                                                                                                                                                                                                                                                                                                                                                                                                                                     |                                                                                                                                                                                                                                                                                                                                                                                                               |                                                                                                                                    |
|------------------------------------------------------|-----------------------------------------------------------------------------------------------------------------------------------------------------------------------------------------------------------------------------------------------------------------------------------------------------------------------------------------------------------------------------------------------------------------------------------------------------------------------------------------------------------------------------------------------------------------------------------------------|---------------------------------------------------------------------------------------------------------------------------------------------------------------------------------------------------------------------------------------------------------------------------------------------------------------------------------------------------------------------------------------------------------------------------------------------------------------------------------------------------------------------------------------------------------------------------------------------------------------------------------------------------------------------------------------------------------------------------------------------------------------------------------------------------------------------------------------------------------------------------------------------------------------------------------------------------------------------------------------------------------------------|---------------------------------------------------------------------------------------------------------------------------------------------------------------------------------------------------------------------------------------------------------------------------------------------------------------------------------------------------------------------------------------------------------------|------------------------------------------------------------------------------------------------------------------------------------|
| Nurse coaching & education<br>Bridging interventions | Coaching nurse self-presentation<br>Delivery of a personalized patient booklet Care according best practice<br>guidelines:<br>- Confirm and document patient goals and treatment preferences, including advance directives.<br>- Confirm and document patient's health care proxy or surrogate decision-maker.<br>- In patients with existing advance directives, discuss new risks associated with the surgical procedure and an approach for potentially life-threatening problems consistent with the patient's values and preferences ("required reconsideration").<br>Weekly phone calls | Coaching nurse visits / phone calls<br>Communication of patient's preference to the staff                                                                                                                                                                                                                                                                                                                                                                                                                                                                                                                                                                                                                                                                                                                                                                                                                                                                                                                           | Coaching nurse visit in the rehabilitation ward<br>Communication of patient's preference and care difficulties to the staff (checklist):<br>- delirium/cognitive impairment<br>- peri-operative acute pain<br>- pulmonary complications<br>- fall risk<br>- ability to maintain adequate nutrition<br>- urinary tract infection prevention<br>- functional decline monitoring<br>- pressure ulcers prevention | Coaching nurse bi-weekly phone call<br>Communication of patient's care difficulties to the staff                                   |
| Nutrition                                            | W-4 : nutritional evaluation<br>Nutritional plan based on measured intake<br>W-3 : nutritional follow up - weight<br>W-2 : nutritional follow up-weight<br>W-1 : nutritional follow up-weight + pre-operative immunonutrition                                                                                                                                                                                                                                                                                                                                                                 | If surgery: Care according best practice guidelines:<br>- Consider shortened fluid fast (clear liquids up to 2 hours before anaesthesia).(29)<br>- Normal food intake or enteral feeding should start as early as possible                                                                                                                                                                                                                                                                                                                                                                                                                                                                                                                                                                                                                                                                                                                                                                                          | Nutritional plan based on<br>- Weight curve<br>- Measured intake<br>Optimal management of<br>- Nausea/vomiting<br>- Abdominal pain                                                                                                                                                                                                                                                                            | Nutritional plan based on<br>- Weight curve<br>- Measured intake<br>Optimal management of<br>- Nausea/vomiting<br>- Abdominal pain |
| Physical activity                                    | W-4 : physical performances evaluation<br>Physical activity plan<br>W-3 : group physical activity<br>W-2 : +<br>W-1 : functional follow-up                                                                                                                                                                                                                                                                                                                                                                                                                                                    | If surgery: care according best practice guidelines:<br>- Early physical and/or occupational therapy.<br>- Check for orthostatic hypotension.<br>- Review physical environment to reduce injury risk.<br>- Assistive walking devices (eg walkers) at bedside if used as outpatient                                                                                                                                                                                                                                                                                                                                                                                                                                                                                                                                                                                                                                                                                                                                  | (to the discretion of the rehabilitation unit)                                                                                                                                                                                                                                                                                                                                                                | Pursuing of the pre-operative physical activity plan                                                                               |
| Medication conciliation                              | Centralized medication conciliation and treatment optimization (STOPP/START guidelines)                                                                                                                                                                                                                                                                                                                                                                                                                                                                                                       | Centralized medication conciliation<br>Advices for care according best practice guidelines (16):<br>- Adhere to existing best practices regarding antibiotic and venous thromboembolism prophylaxis.<br>- Ensure nonessential medications have been stopped and essential medications have been taken.                                                                                                                                                                                                                                                                                                                                                                                                                                                                                                                                                                                                                                                                                                              | Centralized medication conciliation                                                                                                                                                                                                                                                                                                                                                                           | Centralized medication conciliation                                                                                                |
| Standardization of surgical procedures               |                                                                                                                                                                                                                                                                                                                                                                                                                                                                                                                                                                                               | If surgery: consider antiseptic toothpaste<br>If surgery: care according best practice Guidelines (16):<br>- Consideration of regional techniques to avoid postoperative complications and improve pain control.<br>- Directed pain history.<br>- Multi-modal or opioid-sparing techniques.<br>- Postoperative nausea risk stratification and prevention strategies.<br>- Strategies to avoid pressure ulcers and nerve damage.<br>- Prevention of postoperative pulmonary complications and hypothermia.<br>- Judicious use of intravenous fluids.<br>- Appropriate hemodynamic management.<br>- Continuation of indicated cardiac medications.<br>- Daily post-operative rounding checklist:<br>- delirium/cognitive impairment<br>- peri-operative acute pain<br>- pulmonary complications<br>- fall risk<br>- ability to maintain adequate nutrition<br>- urinary tract infection prevention<br>- functional decline monitoring<br>- Pressure ulcers prevention<br>If surgery: consider IV iron supplementation |                                                                                                                                                                                                                                                                                                                                                                                                               |                                                                                                                                    |

714

715

716 Table 2: PROADAPT pilot trial: questionnaires and screening tests

| Domain                 |                                                           |
|------------------------|-----------------------------------------------------------|
| Autonomy               | Activity of Daily Living Scale (ADL)                      |
|                        | Instrumental Activities of Daily Living scale (IADL)      |
| Geriatric screening    | G8                                                        |
| Physical activity      | RAPA (Rapid Assessment of Physical Activity), AIPVQ       |
| Quality of life        | QLQ-C30, QLQ-ED14, EQ-5D-3L, SF-36                        |
| Locomotion and balance | Time Up and Go, SPPB (Short Physical Performance Battery) |
| Pain                   | Pain scale evaluation                                     |
| Nutrition              | Nutrition scale evaluation                                |
| Tiredness severity     | FSS                                                       |
| Depression/anxiety     | MNA, GDS4/GDS15                                           |
| Cognitive assessment   | MINI-COG                                                  |
| Fall risk assessment   | Tinetti test                                              |
| Breathlessness         | Borg scale                                                |

717

718

719 Table 3: PROADAPT pilot trial: flow diagram

|                                             | Baseline | Pre-therapeutic visit<br>(0-5 days before<br>intervention) | M1, M3, M6 | M12 | End of<br>study visit |
|---------------------------------------------|----------|------------------------------------------------------------|------------|-----|-----------------------|
| <i>Complex geriatric assessment</i>         |          |                                                            |            |     |                       |
| G8                                          | X        |                                                            |            | X   | X                     |
| ADL/IADL                                    | X        |                                                            |            | X   | X                     |
| GDS4/GDS15                                  | X        |                                                            |            | X   | X                     |
| MINI COG                                    | X        |                                                            |            | X   | X                     |
| MNA                                         | X        |                                                            |            | X   | X                     |
| QLQ-C30                                     | X        |                                                            | X          | X   | X                     |
| QLQ-ELD14                                   | X        |                                                            | X          | X   | X                     |
| EQ-5D-3L                                    | X        |                                                            | X          | X   | X                     |
| Pain scale evaluation                       | X        | X                                                          | X          | X   | X                     |
| Nutrition scale evaluation                  | X        | X                                                          | X          | X   | X                     |
| Socio-economic evaluation                   | X        |                                                            |            |     |                       |
| <i>Physical and respiratory assessments</i> |          |                                                            |            |     |                       |
| FSS                                         | X        |                                                            | X          | X   | X                     |
| SF-36                                       | X        |                                                            | X          | X   | X                     |
| Time and Go                                 | X        |                                                            |            | X   | X                     |
| SPPB                                        | X        |                                                            | X          | X   | X                     |
| Borg scale                                  | X        |                                                            |            | X   | X                     |
| RAPA questionnaire                          | X        |                                                            | X          | X   | X                     |
| AIPVQ scale                                 | X        |                                                            | X          | X   | X                     |
| Tinetti test                                | X        |                                                            |            | X   | X                     |
| Equimog evaluation                          | X        |                                                            |            | X   | X                     |
| Triflo                                      | X        | X                                                          |            |     |                       |
| Voldyne                                     | X        | X                                                          |            |     |                       |
| Physical activity data collection           |          | X                                                          | X          | X   | X                     |
| <i>Patients' satisfaction</i>               |          |                                                            |            |     |                       |
| Standardized questionnaire                  |          |                                                            |            |     | X                     |

720



Figure 1 : PROADAPT program : interventions at the patient’s level

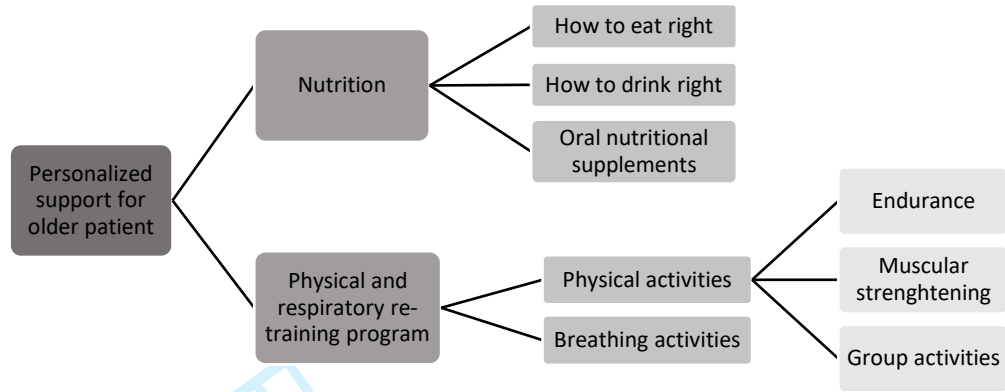

For peer review only

1  
2  
3  
4  
5  
6  
7  
8  
9  
10  
11  
12  
13  
14  
15  
16  
17  
18  
19  
20  
21  
22  
23  
24  
25  
26  
27  
28  
29  
30  
31  
32  
33  
34  
35  
36  
37  
38  
39  
40  
41  
42  
43  
44  
45  
46  
47  
48  
49  
50  
51  
52  
53  
54  
55  
56  
57  
58  
59  
60

Supplementary table 1 : Satisfaction questionnaire

|                                                                                                                                                                          |                                                               |
|--------------------------------------------------------------------------------------------------------------------------------------------------------------------------|---------------------------------------------------------------|
| <br>Hospices Civils de Lyon<br>Direction de la Recherche Clinique<br>et de l'Innovation | <b>PATIENT ASSESSMENT OF THE PROADAPT PILOT PHASE PROGRAM</b> |
|--------------------------------------------------------------------------------------------------------------------------------------------------------------------------|---------------------------------------------------------------|

Mrs, Mr,

You have been part of the PROADAPT - pilot phase study and we thank you for your involvement. In order to assess and improve this study, we would like to collect your opinion. This opinion is anonymous and does not affect your healthcare.

**The following questions concern the patient booklet that was given to you as part of the study**

If you consider the booklet globally

- The explanations seem appropriate to you ? Not at all  A little  Absolutely
- The information seem clear to you ? Not at all  A little  Absolutely
- The pages seem readable enough ? Not at all  A little  Absolutely
- The illustrations seem clear to you ? Not at all  A little  Absolutely

How would you rate the booklet ? 0 1 2 3 4 5 6 7 8 9 10  
(useless = 0 ; very useful = 10)

**The following questions concern the PROADAPT pilot phase program globally (breathing and physical exercises, booklet, calls and follow-up visits)**

Did you have difficulty to understand the explanations given by the medical staff and the physician

- for breathing exercises ? Not at all  A little  A lot
- for physical exercises ? Not at all  A little  A lot
- for nutritional advices ? Not at all  A little  A lot
- during the assessment with the physician on the different drugs you are taking ? Not at all  A little  A lot

Did you encounter any difficulties

- for the realization of breathing exercises ? Not at all  A little  A lot
- for the realization of physical exercises ? Not at all  A little  A lot

- for the setting up of nutritional advice ? Not at all  A little  A lot
- for the filling of activities ? Not at all  A little  A lot

How do you estimate nursing phone calls

- at the beginning of your healthcare before your surgery / radiotherapy Useless  Little important  Needed
- after your surgery/radiotherapy Useless  Little important  Needed

Would you like to get more information ? No  Yes

If yes, which ones,.....  
.....

What would be your propositions to make the program more suitable for patients?  
.....  
.....  
.....

Thank you for your time, we will use your advice to improve the PROADAPT program and the patient booklet.

Pr Claire Falandry, study coordinator

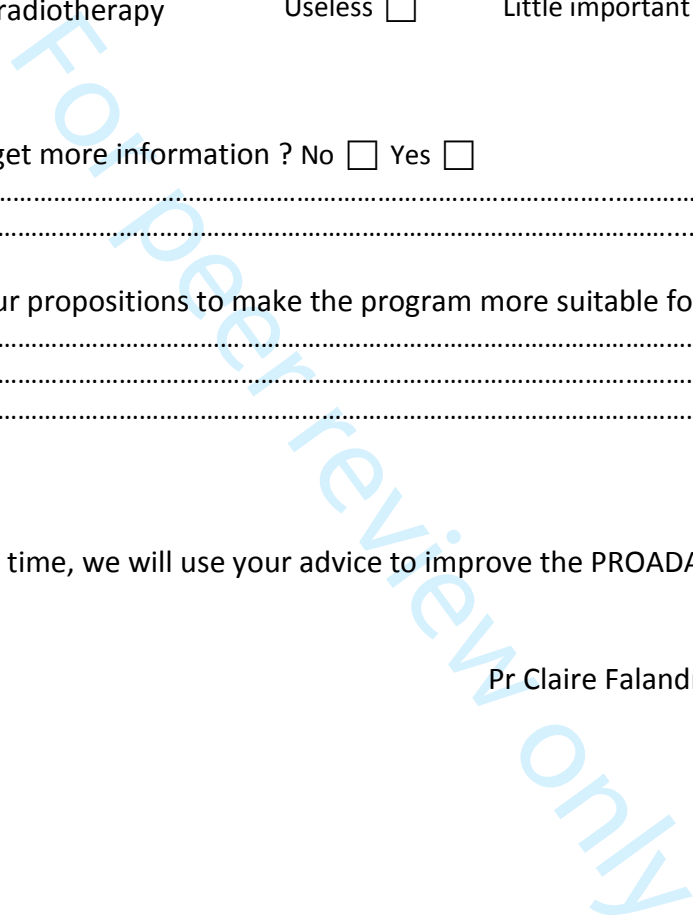

Supplementary table 2: All items from the World Health Organization Trial Registration Data Set (SPIRIT item 2b)

| Data category                                 | Information                                                                                                                                                                                                                                                                                                                                                                                                                                                                                                                                                                                                                                                                                                                                                                                                                                                                                     |
|-----------------------------------------------|-------------------------------------------------------------------------------------------------------------------------------------------------------------------------------------------------------------------------------------------------------------------------------------------------------------------------------------------------------------------------------------------------------------------------------------------------------------------------------------------------------------------------------------------------------------------------------------------------------------------------------------------------------------------------------------------------------------------------------------------------------------------------------------------------------------------------------------------------------------------------------------------------|
| Primary registry and trial identifying number | ClinicalTrials.gov<br>NCT03659123                                                                                                                                                                                                                                                                                                                                                                                                                                                                                                                                                                                                                                                                                                                                                                                                                                                               |
| Date of registration in primary registry      | September 6, 2018                                                                                                                                                                                                                                                                                                                                                                                                                                                                                                                                                                                                                                                                                                                                                                                                                                                                               |
| Secondary identifying numbers                 | 69HCL16_0701<br>ID RCB N° 2018-A001026-49                                                                                                                                                                                                                                                                                                                                                                                                                                                                                                                                                                                                                                                                                                                                                                                                                                                       |
| Source(s) of monetary or material support     | Agence Régionale de Santé Auvergne Rhône Alpes                                                                                                                                                                                                                                                                                                                                                                                                                                                                                                                                                                                                                                                                                                                                                                                                                                                  |
| Primary sponsor                               | Hospices Civils de Lyon                                                                                                                                                                                                                                                                                                                                                                                                                                                                                                                                                                                                                                                                                                                                                                                                                                                                         |
| Secondary sponsor(s)                          |                                                                                                                                                                                                                                                                                                                                                                                                                                                                                                                                                                                                                                                                                                                                                                                                                                                                                                 |
| Contact for public queries                    | David Dayde, +33.4.78.86.37.74, david.dayde@chu-lyon.fr                                                                                                                                                                                                                                                                                                                                                                                                                                                                                                                                                                                                                                                                                                                                                                                                                                         |
| Contact for scientific queries                | Claire Falandry, +33.4.78.86.66.34, claire.falandry@chu-lyon.fr                                                                                                                                                                                                                                                                                                                                                                                                                                                                                                                                                                                                                                                                                                                                                                                                                                 |
| Public title                                  | Prehabilitation & Rehabilitation in Oncogeriatrics: Adaptation to Deconditioning Risk and Accompaniment of Patients' With Cancer                                                                                                                                                                                                                                                                                                                                                                                                                                                                                                                                                                                                                                                                                                                                                                |
| Scientific title                              | Prehabilitation & Rehabilitation in Oncogeriatrics: Adaptation to Deconditioning Risk and Accompaniment of Patients' With Cancer, a Multicenter Pilot Study                                                                                                                                                                                                                                                                                                                                                                                                                                                                                                                                                                                                                                                                                                                                     |
| Countries of recruitment                      | France                                                                                                                                                                                                                                                                                                                                                                                                                                                                                                                                                                                                                                                                                                                                                                                                                                                                                          |
| Health condition(s) or problem(s) studied     | Old Injury                                                                                                                                                                                                                                                                                                                                                                                                                                                                                                                                                                                                                                                                                                                                                                                                                                                                                      |
| Intervention(s)                               | Behavioral: standardized geriatric intervention<br>Nutritional care is based on: <ul style="list-style-type: none"> <li>• A personalized evaluation of nutritional balance and nutritional needs of the patient</li> <li>• A weekly follow-up of weight and nutritional intake</li> </ul> Total-body rehabilitation is based on: <ul style="list-style-type: none"> <li>• 2 to 3 times a week: strength exercise</li> <li>• 2 to 3 times a week: endurance exercise, 20 to 45 min each sequence</li> <li>• 2 times a week: respiratory physiotherapy<br/>Pharmaceutical conciliation and optimization according STOPP/START criteria<br/>During peri-operative time, the nurse contacts the surgical team for transmission of patient's personal data, physical medication conciliation results<br/>During rehabilitation time and hospital-home transition time, the nurse contacts</li> </ul> |

| Data category                        | Information                                                                                                                                                                                                                                                                                                                                                                                                                                                                                                                                                                                                                                                                                                                                                                                                                                                                                                                                                             |
|--------------------------------------|-------------------------------------------------------------------------------------------------------------------------------------------------------------------------------------------------------------------------------------------------------------------------------------------------------------------------------------------------------------------------------------------------------------------------------------------------------------------------------------------------------------------------------------------------------------------------------------------------------------------------------------------------------------------------------------------------------------------------------------------------------------------------------------------------------------------------------------------------------------------------------------------------------------------------------------------------------------------------|
|                                      | the rehabilitation team for transmission of patient's personal data and care course, physical (nutritional, functional and/or comorbidities), medication conciliation results.                                                                                                                                                                                                                                                                                                                                                                                                                                                                                                                                                                                                                                                                                                                                                                                          |
| Key inclusion and exclusion criteria | <p>Inclusion Criteria:</p> <p>Patient <math>\geq 70</math> year old OR patient <math>\geq 60</math> years with significant comorbid condition (modified Charlson index <math>\geq 3</math>) or disability (ADL score <math>&lt; 6/6</math>);</p> <p>Histologically or cytologically proven cancer.</p> <p>Life expectancy <math>&gt; 3</math> months.</p> <p>Written informed consent obtained</p> <p>Covered by a Health System where applicable.</p> <p>Exclusion Criteria:</p> <p>Other malignancy within the last 5 years, except for adequately treated carcinoma in situ of the cervix or squamous carcinoma of the skin, or adequately controlled limited basal cell skin cancer.</p> <p>Patient unable to be regularly followed for any reason (geographic, familial, social, psychological).</p> <p>Any mental or physical handicap at risk of interfering with the appropriate treatment.</p> <p>Any administrative or legal supervision where applicable</p> |
| Study type                           | <p>Interventional</p> <p>Allocation: N/A</p> <p>Intervention model: Single Group Assignment</p> <p>Masking: None (Open Label)</p> <p>Primary purpose: Health Services Research</p> <p>Phase II</p>                                                                                                                                                                                                                                                                                                                                                                                                                                                                                                                                                                                                                                                                                                                                                                      |
| Date of first enrolment              | July 3rd, 2018                                                                                                                                                                                                                                                                                                                                                                                                                                                                                                                                                                                                                                                                                                                                                                                                                                                                                                                                                          |
| Target sample size                   | 122                                                                                                                                                                                                                                                                                                                                                                                                                                                                                                                                                                                                                                                                                                                                                                                                                                                                                                                                                                     |
| Recruitment status                   | Recruiting                                                                                                                                                                                                                                                                                                                                                                                                                                                                                                                                                                                                                                                                                                                                                                                                                                                                                                                                                              |
| Primary outcome(s)                   | <p>Implementation of at least one item of PROADAPT standardized geriatric intervention of the program PROADAPT pilot study [ Time Frame: 12 months ]:</p> <ul style="list-style-type: none"> <li>• Preoperative physical activity including strength and endurance exercise assessed by physical exercises accomplished under the supervision of a physiotherapist. Number of patients with at least 1 intervention achieved in the domain.</li> <li>• Nutrition guidelines before and after physical activity assessed by questionnaires. Number of patients with at least 1 intervention achieved in the domain.</li> </ul>                                                                                                                                                                                                                                                                                                                                           |

| Data category          | Information                                                                                                                                                                                                                                                                                                                                                                                                                                                                                                                                                                                                                                                                                                                                                                                                                                              |
|------------------------|----------------------------------------------------------------------------------------------------------------------------------------------------------------------------------------------------------------------------------------------------------------------------------------------------------------------------------------------------------------------------------------------------------------------------------------------------------------------------------------------------------------------------------------------------------------------------------------------------------------------------------------------------------------------------------------------------------------------------------------------------------------------------------------------------------------------------------------------------------|
|                        | <ul style="list-style-type: none"> <li>• Patient education and coaching assessed by questionnaires and visits. Number of patients with at least 1 intervention achieved in the domain</li> <li>• Achievement of standardized intervention procedures, according to the checklist established in consensus with surgeons. Number of patients with at least 1 intervention achieved in the domain</li> <li>• Rehabilitation assessed by questionnaires. Number of patients with at least 1 intervention achieved in the domain</li> <li>• Accomplishment of pharmaceutical medication conciliation and treatment optimization. Number of patients with at least 1 intervention achieved in the domain</li> <li>• Bridging interventions for hospital-to-home transition. Number of patients with at least 1 intervention achieved in the domain</li> </ul> |
| Key secondary outcomes | <ul style="list-style-type: none"> <li>• Post operative morbidity [ Time Frame: 30 and 90 days ] according Clavien-Dindo classification</li> <li>• Post-operative morbidity [ Time Frame: 90 days ] according to NCI CTC v4.4</li> <li>• Therapeutic strategy [ Time Frame: 12 months ]: Treatment plan completion rate: Number of patients for whom the treatment plan was completed.</li> <li>• Progression-free Survival [ Time Frame: 12 months ]</li> <li>• Post-treatment complication [ Time Frame: 12 months ]: Post-treatment complication grade<math>\geq</math>3 according the National Cancer Institute Common Toxicity Criteria version 4 (NCI-CTC-v4)</li> </ul>                                                                                                                                                                           |



Supplementary table 1: SPIRIT 2013 checklist of the trial

SPIRIT 2013 Checklist: Recommended items to address in a clinical trial protocol and related documents\*

| Section/item                      | ItemNo | Description                                                                                                  | Reported on page #                               |
|-----------------------------------|--------|--------------------------------------------------------------------------------------------------------------|--------------------------------------------------|
| <b>Administrative information</b> |        |                                                                                                              |                                                  |
| Title                             | 1      | Descriptive title identifying the study design, population, interventions, and, if applicable, trial acronym | 1                                                |
| Trial registration                | 2a     | Trial identifier and registry name. If not yet registered, name of intended registry                         | 2                                                |
|                                   | 2b     | All items from the World Health Organization Trial Registration Data Set                                     | Supplementary table 2<br>Ref 24                  |
| Protocol version                  | 3      | Date and version identifier                                                                                  | 17 (Ethics and Consent to participate)           |
| Funding                           | 4      | Sources and types of financial, material, and other support                                                  | 17-18 (Funding)                                  |
| Roles and responsibilities        | 5a     | Names, affiliations, and roles of protocol contributors                                                      | 1 (Authors' list)<br>18 (Authors' contributions) |
|                                   | 5b     | Name and contact information for the trial sponsor                                                           | Supplementary table 2<br>Ref 24                  |

1  
2  
3  
4  
5  
6  
7  
8  
9  
10  
11  
12  
13  
14  
15  
16  
17  
18  
19  
20  
21  
22  
23  
24  
25  
26  
27  
28  
29  
30  
31  
32  
33  
34  
35  
36  
37  
38  
39  
40  
41  
42  
43  
44  
45  
46

|                                                           |    |                                                                                                                                                                                                                                                                                          |                                                                       |
|-----------------------------------------------------------|----|------------------------------------------------------------------------------------------------------------------------------------------------------------------------------------------------------------------------------------------------------------------------------------------|-----------------------------------------------------------------------|
|                                                           | 5c | Role of study sponsor and funders, if any, in study design; collection, management, analysis, and interpretation of data; writing of the report; and the decision to submit the report for publication, including whether they will have ultimate authority over any of these activities | 10 (Ethical and legal considerations)<br>17 (Funding)                 |
|                                                           | 5d | Composition, roles, and responsibilities of the coordinating centre, steering committee, endpoint adjudication committee, data management team, and other individuals or groups overseeing the trial, if applicable (see Item 21a for data monitoring committee)                         | 13 (Data management and statistical analyses)<br>14 (Data monitoring) |
| <b>Introduction</b>                                       |    |                                                                                                                                                                                                                                                                                          |                                                                       |
| Background and rationale                                  | 6a | Description of research question and justification for undertaking the trial, including summary of relevant studies (published and unpublished) examining benefits and harms for each intervention                                                                                       | 3                                                                     |
|                                                           | 6b | Explanation for choice of comparators                                                                                                                                                                                                                                                    | N/A                                                                   |
| Objectives                                                | 7  | Specific objectives or hypotheses                                                                                                                                                                                                                                                        | 4                                                                     |
| Trial design                                              | 8  | Description of trial design including type of trial (eg, parallel group, crossover, factorial, single group), allocation ratio, and framework (eg, superiority, equivalence, noninferiority, exploratory)                                                                                | 5                                                                     |
| <b>Methods: Participants, interventions, and outcomes</b> |    |                                                                                                                                                                                                                                                                                          |                                                                       |
| Study setting                                             | 9  | Description of study settings (eg, community clinic, academic hospital) and list of countries where data will be collected. Reference to where list of study sites can be obtained                                                                                                       | 5                                                                     |



|    |                      |     |                                                                                                                                                                                                                                                                                                                                                                                |                                                                            |
|----|----------------------|-----|--------------------------------------------------------------------------------------------------------------------------------------------------------------------------------------------------------------------------------------------------------------------------------------------------------------------------------------------------------------------------------|----------------------------------------------------------------------------|
| 1  |                      |     |                                                                                                                                                                                                                                                                                                                                                                                |                                                                            |
| 2  |                      |     |                                                                                                                                                                                                                                                                                                                                                                                |                                                                            |
| 3  |                      |     |                                                                                                                                                                                                                                                                                                                                                                                |                                                                            |
| 4  | Eligibility criteria | 10  | Inclusion and exclusion criteria for participants. If applicable, eligibility criteria for study centres and individuals who will perform the interventions (eg, surgeons, psychotherapists)                                                                                                                                                                                   | 5                                                                          |
| 5  |                      |     |                                                                                                                                                                                                                                                                                                                                                                                |                                                                            |
| 6  |                      |     |                                                                                                                                                                                                                                                                                                                                                                                |                                                                            |
| 7  |                      |     |                                                                                                                                                                                                                                                                                                                                                                                |                                                                            |
| 8  | Interventions        | 11a | Interventions for each group with sufficient detail to allow replication, including how and when they will be administered                                                                                                                                                                                                                                                     | 5-6                                                                        |
| 9  |                      |     |                                                                                                                                                                                                                                                                                                                                                                                |                                                                            |
| 10 |                      |     |                                                                                                                                                                                                                                                                                                                                                                                |                                                                            |
| 11 |                      | 11b | Criteria for discontinuing or modifying allocated interventions for a given trial participant (eg, drug dose change in response to harms, participant request, or improving/worsening disease)                                                                                                                                                                                 | 14 (End of protocol)<br>And N/4 (no dose modifications)                    |
| 12 |                      |     |                                                                                                                                                                                                                                                                                                                                                                                |                                                                            |
| 13 |                      |     |                                                                                                                                                                                                                                                                                                                                                                                |                                                                            |
| 14 |                      |     |                                                                                                                                                                                                                                                                                                                                                                                |                                                                            |
| 15 |                      | 11c | Strategies to improve adherence to intervention protocols, and any procedures for monitoring adherence (eg, drug tablet return, laboratory tests)                                                                                                                                                                                                                              | 6 (two turns of validations of the PROADAPT booklet by candidate patients) |
| 16 |                      |     |                                                                                                                                                                                                                                                                                                                                                                                |                                                                            |
| 17 |                      |     |                                                                                                                                                                                                                                                                                                                                                                                |                                                                            |
| 18 |                      |     |                                                                                                                                                                                                                                                                                                                                                                                |                                                                            |
| 19 |                      |     |                                                                                                                                                                                                                                                                                                                                                                                |                                                                            |
| 20 |                      |     |                                                                                                                                                                                                                                                                                                                                                                                |                                                                            |
| 21 |                      | 11d | Relevant concomitant care and interventions that are permitted or prohibited during the trial                                                                                                                                                                                                                                                                                  | N/A                                                                        |
| 22 |                      |     |                                                                                                                                                                                                                                                                                                                                                                                |                                                                            |
| 23 |                      |     |                                                                                                                                                                                                                                                                                                                                                                                |                                                                            |
| 24 | Outcomes             | 12  | Primary, secondary, and other outcomes, including the specific measurement variable (eg, systolic blood pressure), analysis metric (eg, change from baseline, final value, time to event), method of aggregation (eg, median, proportion), and time point for each outcome. Explanation of the clinical relevance of chosen efficacy and harm outcomes is strongly recommended | 11-12                                                                      |
| 25 |                      |     |                                                                                                                                                                                                                                                                                                                                                                                |                                                                            |
| 26 |                      |     |                                                                                                                                                                                                                                                                                                                                                                                |                                                                            |
| 27 |                      |     |                                                                                                                                                                                                                                                                                                                                                                                |                                                                            |
| 28 |                      |     |                                                                                                                                                                                                                                                                                                                                                                                |                                                                            |
| 29 |                      |     |                                                                                                                                                                                                                                                                                                                                                                                |                                                                            |
| 30 |                      |     |                                                                                                                                                                                                                                                                                                                                                                                |                                                                            |
| 31 | Participant timeline | 13  | Time schedule of enrolment, interventions (including any run-ins and washouts), assessments, and visits for participants. A schematic diagram is highly recommended (see Figure)                                                                                                                                                                                               | 8-9                                                                        |
| 32 |                      |     |                                                                                                                                                                                                                                                                                                                                                                                |                                                                            |
| 33 |                      |     |                                                                                                                                                                                                                                                                                                                                                                                |                                                                            |
| 34 |                      |     |                                                                                                                                                                                                                                                                                                                                                                                |                                                                            |
| 35 |                      |     |                                                                                                                                                                                                                                                                                                                                                                                |                                                                            |
| 36 | Sample size          | 14  | Estimated number of participants needed to achieve study objectives and how it was determined, including clinical and statistical assumptions supporting any sample size calculations                                                                                                                                                                                          | 12-13 (Sample size calculation)                                            |
| 37 |                      |     |                                                                                                                                                                                                                                                                                                                                                                                |                                                                            |
| 38 |                      |     |                                                                                                                                                                                                                                                                                                                                                                                |                                                                            |
| 39 |                      |     |                                                                                                                                                                                                                                                                                                                                                                                |                                                                            |
| 40 |                      |     |                                                                                                                                                                                                                                                                                                                                                                                |                                                                            |
| 41 |                      |     |                                                                                                                                                                                                                                                                                                                                                                                |                                                                            |
| 42 |                      |     |                                                                                                                                                                                                                                                                                                                                                                                |                                                                            |
| 43 |                      |     |                                                                                                                                                                                                                                                                                                                                                                                |                                                                            |
| 44 |                      |     |                                                                                                                                                                                                                                                                                                                                                                                |                                                                            |
| 45 |                      |     |                                                                                                                                                                                                                                                                                                                                                                                |                                                                            |
| 46 |                      |     |                                                                                                                                                                                                                                                                                                                                                                                |                                                                            |

1  
2  
3  
4  
5  
6  
7  
8  
9  
10  
11  
12  
13  
14  
15  
16  
17  
18  
19  
20  
21  
22  
23  
24  
25  
26  
27  
28  
29  
30  
31  
32  
33  
34  
35  
36  
37  
38  
39  
40  
41  
42  
43  
44  
45  
46

|             |    |                                                                                     |                              |
|-------------|----|-------------------------------------------------------------------------------------|------------------------------|
| Recruitment | 15 | Strategies for achieving adequate participant enrolment to reach target sample size | N/A (no problem for accrual) |
|-------------|----|-------------------------------------------------------------------------------------|------------------------------|

**Methods: Assignment of interventions (for controlled trials)** **N/A**

Allocation:

|                                  |     |                                                                                                                                                                                                                                                                                                                                                          |   |
|----------------------------------|-----|----------------------------------------------------------------------------------------------------------------------------------------------------------------------------------------------------------------------------------------------------------------------------------------------------------------------------------------------------------|---|
| Sequence generation              | 16a | Method of generating the allocation sequence (eg, computer-generated random numbers), and list of any factors for stratification. To reduce predictability of a random sequence, details of any planned restriction (eg, blocking) should be provided in a separate document that is unavailable to those who enrol participants or assign interventions | - |
| Allocation concealment mechanism | 16b | Mechanism of implementing the allocation sequence (eg, central telephone; sequentially numbered, opaque, sealed envelopes), describing any steps to conceal the sequence until interventions are assigned                                                                                                                                                | - |
| Implementation                   | 16c | Who will generate the allocation sequence, who will enrol participants, and who will assign participants to interventions                                                                                                                                                                                                                                | - |
| Blinding (masking)               | 17a | Who will be blinded after assignment to interventions (eg, trial participants, care providers, outcome assessors, data analysts), and how                                                                                                                                                                                                                | - |
|                                  | 17b | If blinded, circumstances under which unblinding is permissible, and procedure for revealing a participant’s allocated intervention during the trial                                                                                                                                                                                                     | - |

**Methods: Data collection, management, and analysis**

|    |                         |     |                                                                                                                                                                                                                                                                                                                                                                                                              |                                                  |
|----|-------------------------|-----|--------------------------------------------------------------------------------------------------------------------------------------------------------------------------------------------------------------------------------------------------------------------------------------------------------------------------------------------------------------------------------------------------------------|--------------------------------------------------|
| 1  |                         |     |                                                                                                                                                                                                                                                                                                                                                                                                              |                                                  |
| 2  |                         |     |                                                                                                                                                                                                                                                                                                                                                                                                              |                                                  |
| 3  |                         |     |                                                                                                                                                                                                                                                                                                                                                                                                              |                                                  |
| 4  | Data collection methods | 18a | Plans for assessment and collection of outcome, baseline, and other trial data, including any related processes to promote data quality (eg, duplicate measurements, training of assessors) and a description of study instruments (eg, questionnaires, laboratory tests) along with their reliability and validity, if known. Reference to where data collection forms can be found, if not in the protocol | Table 3                                          |
| 5  |                         |     |                                                                                                                                                                                                                                                                                                                                                                                                              |                                                  |
| 6  |                         |     |                                                                                                                                                                                                                                                                                                                                                                                                              |                                                  |
| 7  |                         |     |                                                                                                                                                                                                                                                                                                                                                                                                              |                                                  |
| 8  |                         |     |                                                                                                                                                                                                                                                                                                                                                                                                              |                                                  |
| 9  |                         |     |                                                                                                                                                                                                                                                                                                                                                                                                              |                                                  |
| 10 |                         |     |                                                                                                                                                                                                                                                                                                                                                                                                              |                                                  |
| 11 |                         |     |                                                                                                                                                                                                                                                                                                                                                                                                              |                                                  |
| 12 |                         | 18b | Plans to promote participant retention and complete follow-up, including list of any outcome data to be collected for participants who discontinue or deviate from intervention protocols                                                                                                                                                                                                                    | N/A                                              |
| 13 |                         |     |                                                                                                                                                                                                                                                                                                                                                                                                              |                                                  |
| 14 |                         |     |                                                                                                                                                                                                                                                                                                                                                                                                              |                                                  |
| 15 |                         |     |                                                                                                                                                                                                                                                                                                                                                                                                              |                                                  |
| 16 | Data management         | 19  | Plans for data entry, coding, security, and storage, including any related processes to promote data quality (eg, double data entry; range checks for data values). Reference to where details of data management procedures can be found, if not in the protocol                                                                                                                                            | 13 (Data management and statistical analyses)    |
| 17 |                         |     |                                                                                                                                                                                                                                                                                                                                                                                                              |                                                  |
| 18 |                         |     |                                                                                                                                                                                                                                                                                                                                                                                                              |                                                  |
| 19 |                         |     |                                                                                                                                                                                                                                                                                                                                                                                                              |                                                  |
| 20 |                         |     |                                                                                                                                                                                                                                                                                                                                                                                                              |                                                  |
| 21 |                         |     |                                                                                                                                                                                                                                                                                                                                                                                                              |                                                  |
| 22 | Statistical methods     | 20a | Statistical methods for analysing primary and secondary outcomes. Reference to where other details of the statistical analysis plan can be found, if not in the protocol                                                                                                                                                                                                                                     | 13-14 (Data management and statistical analyses) |
| 23 |                         |     |                                                                                                                                                                                                                                                                                                                                                                                                              |                                                  |
| 24 |                         |     |                                                                                                                                                                                                                                                                                                                                                                                                              |                                                  |
| 25 |                         |     |                                                                                                                                                                                                                                                                                                                                                                                                              |                                                  |
| 26 |                         | 20b | Methods for any additional analyses (eg, subgroup and adjusted analyses)                                                                                                                                                                                                                                                                                                                                     | N/A                                              |
| 27 |                         |     |                                                                                                                                                                                                                                                                                                                                                                                                              |                                                  |
| 28 |                         | 20c | Definition of analysis population relating to protocol non-adherence (eg, as randomised analysis), and any statistical methods to handle missing data (eg, multiple imputation)                                                                                                                                                                                                                              | N/A                                              |
| 29 |                         |     |                                                                                                                                                                                                                                                                                                                                                                                                              |                                                  |
| 30 |                         |     |                                                                                                                                                                                                                                                                                                                                                                                                              |                                                  |
| 31 |                         |     |                                                                                                                                                                                                                                                                                                                                                                                                              |                                                  |
| 32 |                         |     |                                                                                                                                                                                                                                                                                                                                                                                                              |                                                  |

### Methods: Monitoring

1  
2  
3  
4  
5  
6  
7  
8  
9  
10  
11  
12  
13  
14  
15  
16  
17  
18  
19  
20  
21  
22  
23  
24  
25  
26  
27  
28  
29  
30  
31  
32  
33  
34  
35  
36  
37  
38  
39  
40  
41  
42  
43  
44  
45  
46

Data monitoring

21a

Composition of data monitoring committee (DMC); summary of its role and reporting structure; statement of whether it is independent from the sponsor and competing interests; and reference to where further details about its charter can be found, if not in the protocol. Alternatively, an explanation of why a DMC is not needed

14 (Data Monitoring)

21b

Description of any interim analyses and stopping guidelines, including who will have access to these interim results and make the final decision to terminate the trial

N/A

Harms

22

Plans for collecting, assessing, reporting, and managing solicited and spontaneously reported adverse events and other unintended effects of trial interventions or trial conduct

11 (Secondary outcomes: NCI CTCAE, QOL)

Auditing

23

Frequency and procedures for auditing trial conduct, if any, and whether the process will be independent from investigators and the sponsor

N/A

**Ethics and dissemination**

Research ethics approval

24

Plans for seeking research ethics committee/institutional review board (REC/IRB) approval

10 (Ethical and legal considerations)

Protocol amendments

25

Plans for communicating important protocol modifications (eg, changes to eligibility criteria, outcomes, analyses) to relevant parties (eg, investigators, REC/IRBs, trial participants, trial registries, journals, regulators)

10 (Ethical and legal considerations)  
14 (Protocol amendments)

Consent or assent

26a

Who will obtain informed consent or assent from potential trial participants or authorised surrogates, and how (see Item 32)

10-11 (Ethical and legal considerations)

26b

Additional consent provisions for collection and use of participant data and biological specimens in ancillary studies, if applicable

N/A

|    |                               |     |                                                                                                                                                                                                                                                                                     |                                         |
|----|-------------------------------|-----|-------------------------------------------------------------------------------------------------------------------------------------------------------------------------------------------------------------------------------------------------------------------------------------|-----------------------------------------|
| 1  |                               |     |                                                                                                                                                                                                                                                                                     |                                         |
| 2  |                               |     |                                                                                                                                                                                                                                                                                     |                                         |
| 3  |                               |     |                                                                                                                                                                                                                                                                                     |                                         |
| 4  | Confidentiality               | 27  | How personal information about potential and enrolled participants will be collected, shared, and maintained in order to protect confidentiality before, during, and after the trial                                                                                                | 14 (Confidentiality)                    |
| 5  |                               |     |                                                                                                                                                                                                                                                                                     |                                         |
| 6  |                               |     |                                                                                                                                                                                                                                                                                     |                                         |
| 7  |                               |     |                                                                                                                                                                                                                                                                                     |                                         |
| 8  | Declaration of interests      | 28  | Financial and other competing interests for principal investigators for the overall trial and each study site                                                                                                                                                                       | 17 (Competing interests)                |
| 9  |                               |     |                                                                                                                                                                                                                                                                                     |                                         |
| 10 |                               |     |                                                                                                                                                                                                                                                                                     |                                         |
| 11 | Access to data                | 29  | Statement of who will have access to the final trial dataset, and disclosure of contractual agreements that limit such access for investigators                                                                                                                                     | 17 (Availability of data and materials) |
| 12 |                               |     |                                                                                                                                                                                                                                                                                     |                                         |
| 13 |                               |     |                                                                                                                                                                                                                                                                                     |                                         |
| 14 | Ancillary and post-trial care | 30  | Provisions, if any, for ancillary and post-trial care, and for compensation to those who suffer harm from trial participation                                                                                                                                                       | N/A                                     |
| 15 |                               |     |                                                                                                                                                                                                                                                                                     |                                         |
| 16 |                               |     |                                                                                                                                                                                                                                                                                     |                                         |
| 17 |                               |     |                                                                                                                                                                                                                                                                                     |                                         |
| 18 | Dissemination policy          | 31a | Plans for investigators and sponsor to communicate trial results to participants, healthcare professionals, the public, and other relevant groups (eg, via publication, reporting in results databases, or other data sharing arrangements), including any publication restrictions | 15 (Dissemination policy)               |
| 19 |                               |     |                                                                                                                                                                                                                                                                                     |                                         |
| 20 |                               |     |                                                                                                                                                                                                                                                                                     |                                         |
| 21 |                               |     |                                                                                                                                                                                                                                                                                     |                                         |
| 22 |                               |     |                                                                                                                                                                                                                                                                                     |                                         |
| 23 |                               |     |                                                                                                                                                                                                                                                                                     |                                         |
| 24 |                               | 31b | Authorship eligibility guidelines and any intended use of professional writers                                                                                                                                                                                                      | 15 (Dissemination policy), N/A          |
| 25 |                               |     |                                                                                                                                                                                                                                                                                     |                                         |
| 26 |                               |     |                                                                                                                                                                                                                                                                                     |                                         |
| 27 |                               | 31c | Plans, if any, for granting public access to the full protocol, participant-level dataset, and statistical code                                                                                                                                                                     | N/A                                     |
| 28 |                               |     |                                                                                                                                                                                                                                                                                     |                                         |
| 29 |                               |     |                                                                                                                                                                                                                                                                                     |                                         |
| 30 | <b>Appendices</b>             |     |                                                                                                                                                                                                                                                                                     |                                         |
| 31 |                               |     |                                                                                                                                                                                                                                                                                     |                                         |
| 32 | Informed consent materials    | 32  | Model consent form and other related documentation given to participants and authorised surrogates                                                                                                                                                                                  | Annex 1 (in French)                     |
| 33 |                               |     |                                                                                                                                                                                                                                                                                     |                                         |
| 34 |                               |     |                                                                                                                                                                                                                                                                                     |                                         |
| 35 | Biological specimens          | 33  | Plans for collection, laboratory evaluation, and storage of biological specimens for genetic or molecular analysis in the current trial and for future use in ancillary studies, if applicable                                                                                      | N/A                                     |
| 36 |                               |     |                                                                                                                                                                                                                                                                                     |                                         |
| 37 |                               |     |                                                                                                                                                                                                                                                                                     |                                         |
| 38 |                               |     |                                                                                                                                                                                                                                                                                     |                                         |
| 39 |                               |     |                                                                                                                                                                                                                                                                                     |                                         |
| 40 |                               |     |                                                                                                                                                                                                                                                                                     |                                         |
| 41 |                               |     |                                                                                                                                                                                                                                                                                     |                                         |
| 42 |                               |     |                                                                                                                                                                                                                                                                                     |                                         |
| 43 |                               |     |                                                                                                                                                                                                                                                                                     |                                         |
| 44 |                               |     |                                                                                                                                                                                                                                                                                     |                                         |
| 45 |                               |     |                                                                                                                                                                                                                                                                                     |                                         |
| 46 |                               |     |                                                                                                                                                                                                                                                                                     |                                         |

1  
2  
3  
4  
5  
6  
7  
8  
9  
10  
11  
12  
13  
14  
15  
16  
17  
18  
19  
20  
21  
22  
23  
24  
25  
26  
27  
28  
29  
30  
31  
32  
33  
34  
35  
36  
37  
38  
39  
40  
41  
42  
43  
44  
45  
46

\*It is strongly recommended that this checklist be read in conjunction with the SPIRIT 2013 Explanation & Elaboration for important clarification on the items. Amendments to the protocol should be tracked and dated. The SPIRIT checklist is copyrighted by the SPIRIT Group under the Creative Commons "[Attribution-NonCommercial-NoDerivs 3.0 Unported](#)" license.

For peer review only

# BMJ Open

## Feasibility of a prehabilitation program dedicated to older cancer patients before complex medico-surgical procedures: the PROADAPT pilot study protocol

|                               |                                                                                                                                                                                                                                                                                                                                                                                                                                                                                                                                                                                                                                                                                                                                                                                                                                                                                                                                                                                                                                                                                                                                                                                                                                                                                                                                                                                                                                                                                                                                                                                                                                                                                                                                                                                                                                                                                                                                                                                                                                                                                                                                        |
|-------------------------------|----------------------------------------------------------------------------------------------------------------------------------------------------------------------------------------------------------------------------------------------------------------------------------------------------------------------------------------------------------------------------------------------------------------------------------------------------------------------------------------------------------------------------------------------------------------------------------------------------------------------------------------------------------------------------------------------------------------------------------------------------------------------------------------------------------------------------------------------------------------------------------------------------------------------------------------------------------------------------------------------------------------------------------------------------------------------------------------------------------------------------------------------------------------------------------------------------------------------------------------------------------------------------------------------------------------------------------------------------------------------------------------------------------------------------------------------------------------------------------------------------------------------------------------------------------------------------------------------------------------------------------------------------------------------------------------------------------------------------------------------------------------------------------------------------------------------------------------------------------------------------------------------------------------------------------------------------------------------------------------------------------------------------------------------------------------------------------------------------------------------------------------|
| Journal:                      | <i>BMJ Open</i>                                                                                                                                                                                                                                                                                                                                                                                                                                                                                                                                                                                                                                                                                                                                                                                                                                                                                                                                                                                                                                                                                                                                                                                                                                                                                                                                                                                                                                                                                                                                                                                                                                                                                                                                                                                                                                                                                                                                                                                                                                                                                                                        |
| Manuscript ID                 | bmjopen-2020-042960.R2                                                                                                                                                                                                                                                                                                                                                                                                                                                                                                                                                                                                                                                                                                                                                                                                                                                                                                                                                                                                                                                                                                                                                                                                                                                                                                                                                                                                                                                                                                                                                                                                                                                                                                                                                                                                                                                                                                                                                                                                                                                                                                                 |
| Article Type:                 | Protocol                                                                                                                                                                                                                                                                                                                                                                                                                                                                                                                                                                                                                                                                                                                                                                                                                                                                                                                                                                                                                                                                                                                                                                                                                                                                                                                                                                                                                                                                                                                                                                                                                                                                                                                                                                                                                                                                                                                                                                                                                                                                                                                               |
| Date Submitted by the Author: | 08-Jan-2021                                                                                                                                                                                                                                                                                                                                                                                                                                                                                                                                                                                                                                                                                                                                                                                                                                                                                                                                                                                                                                                                                                                                                                                                                                                                                                                                                                                                                                                                                                                                                                                                                                                                                                                                                                                                                                                                                                                                                                                                                                                                                                                            |
| Complete List of Authors:     | <p>Roche, Mélanie; Hospices Civils de Lyon, Plateforme Transversale de Recherche de l'ICHCL</p> <p>Ravot, Christine; Hospices Civils de Lyon, Geriatrics unit. Centre Hospitalier Lyon Sud</p> <p>Malapert, Amélie; Hospices Civils de Lyon, Plateforme Transversale de Recherche de l'ICHCL</p> <p>Paget-Bailly, Sophie; University Hospital Centre Besancon, Methodology and Quality of Life Unit in Oncology; Université Bourgogne Franche-Comté, INSERM, EFS BFC, UMR1098, Interactions Hôte-Greffon-Tumeur/Ingénierie Cellulaire Et Génique</p> <p>Garandeau, Charlène; Hospices Civils de Lyon, Direction à la Recherche Clinique et à l'Innovation</p> <p>Pitiot, Virginie; Hospices Civils de Lyon, Plateforme Transversale de Recherche de l'ICHCL</p> <p>Tomatis, Mélanie; Hospices Civils de Lyon, Geriatrics unit. Centre Hospitalier Lyon Sud</p> <p>Riche, Benjamin; Hospices Civils de Lyon, Service de Biostatistique - Bioinformatique, Pôle Santé Publique; Université de Lyon, Laboratoire de Biométrie et Biologie Évolutive CNRS UMR 5558, Équipe Biostatistiques Santé</p> <p>Galamand, Béatrice; Hospices Civils de Lyon, Geriatrics unit. Centre Hospitalier Lyon Sud</p> <p>Granger, Marion; Hospices Civils de Lyon, Geriatrics unit; Centre Hospitalier de Chambéry</p> <p>Barbavara, Claire; Hospices Civils de Lyon, Geriatrics unit</p> <p>Bourgeois, Chrystelle; Centre Hospitalier Annecy Genevois, Medical Oncology</p> <p>Genest, Evelyne; Hospices Civils de Lyon, Geriatrics unit</p> <p>Stefani, Laetitia; Centre Hospitalier Annecy Genevois, Medical oncology</p> <p>Haïne, Max; Hôpital Nord-Ouest, Pôle de gériatrie et Médecine de Réadaptation</p> <p>Castel-Kremer, Elisabeth; Hospices Civils de Lyon, Geriatrics unit. Hôpital Edouard Herriot.</p> <p>Morel-Soldner, Isabelle; Hospices Civils de Lyon, Geriatrics unit. Centre Hospitalier de la Croix Rousse</p> <p>Collange, Vincent; Medipole Lyon-Villeurbanne, Département anesthésie réanimation</p> <p>Le Saux, Olivia; Centre de Recherche en Cancerologie de Lyon, Therapeutic targeting of the tumor cell and its immune</p> |

1  
2  
3  
4  
5  
6  
7  
8  
9  
10  
11  
12  
13  
14  
15  
16  
17  
18  
19  
20  
21  
22  
23  
24  
25  
26  
27  
28  
29  
30  
31  
32  
33  
34  
35  
36  
37  
38  
39  
40  
41  
42  
43  
44  
45  
46  
47  
48  
49  
50  
51  
52  
53  
54  
55  
56  
57  
58  
59  
60

|                                 |                                                                                                                                                                                                                                                                                                                          |
|---------------------------------|--------------------------------------------------------------------------------------------------------------------------------------------------------------------------------------------------------------------------------------------------------------------------------------------------------------------------|
|                                 | microenvironnement<br>Dayde, David; Hospices Civils de Lyon, Plateforme Transversale de Recherche de l'ICHCL<br>Falandry, Claire; Hospices Civils de Lyon, Geriatrics unit; University of Lyon, CarMeN Laboratory, Inserm U1060, INRA U1397, Université Claude Bernard Lyon 1, INSA Lyon, Charles Mérieux Medical School |
| <b>Primary Subject Heading</b>: | Oncology                                                                                                                                                                                                                                                                                                                 |
| Secondary Subject Heading:      | Geriatric medicine, Surgery                                                                                                                                                                                                                                                                                              |
| Keywords:                       | Adult oncology < ONCOLOGY, GERIATRIC MEDICINE, REHABILITATION MEDICINE, Adult surgery < SURGERY                                                                                                                                                                                                                          |
|                                 |                                                                                                                                                                                                                                                                                                                          |

SCHOLARONE™  
Manuscripts



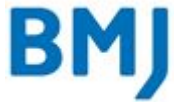

I, the Submitting Author has the right to grant and does grant on behalf of all authors of the Work (as defined in the below author licence), an exclusive licence and/or a non-exclusive licence for contributions from authors who are: i) UK Crown employees; ii) where BMJ has agreed a CC-BY licence shall apply, and/or iii) in accordance with the terms applicable for US Federal Government officers or employees acting as part of their official duties; on a worldwide, perpetual, irrevocable, royalty-free basis to BMJ Publishing Group Ltd ("BMJ") its licensees and where the relevant Journal is co-owned by BMJ to the co-owners of the Journal, to publish the Work in this journal and any other BMJ products and to exploit all rights, as set out in our [licence](#).

The Submitting Author accepts and understands that any supply made under these terms is made by BMJ to the Submitting Author unless you are acting as an employee on behalf of your employer or a postgraduate student of an affiliated institution which is paying any applicable article publishing charge ("APC") for Open Access articles. Where the Submitting Author wishes to make the Work available on an Open Access basis (and intends to pay the relevant APC), the terms of reuse of such Open Access shall be governed by a Creative Commons licence – details of these licences and which [Creative Commons](#) licence will apply to this Work are set out in our licence referred to above.

Other than as permitted in any relevant BMJ Author's Self Archiving Policies, I confirm this Work has not been accepted for publication elsewhere, is not being considered for publication elsewhere and does not duplicate material already published. I confirm all authors consent to publication of this Work and authorise the granting of this licence.

1  
2  
3  
4 1 **Feasibility of a prehabilitation program dedicated to older cancer**  
5  
6 2 **patients before complex medico-surgical procedures: the PROADAPT**  
7  
8 3 **pilot study protocol**  
9

10  
11 4 Mélanie Roche ([melanie.roche02@chu-lyon.fr](mailto:melanie.roche02@chu-lyon.fr))  
12

13 5 Christine Ravot ([christine.ravot@chu-lyon.fr](mailto:christine.ravot@chu-lyon.fr))  
14

15 6 Amélie Malapert ([amelie.malapert@chu-lyon.fr](mailto:amelie.malapert@chu-lyon.fr))  
16

17 7 Sophie Paget-Bailly ([spaget@chu-besancon.fr](mailto:spaget@chu-besancon.fr))  
18

19 8 Charlène Garandean ([charlene.garandean@chu-lyon.fr](mailto:charlene.garandean@chu-lyon.fr))  
20

21 9 Virginie Pitiot ([virginie.pitiot@chu-lyon.fr](mailto:virginie.pitiot@chu-lyon.fr))  
22

23 10 Mélanie Tomatis ([melanie.tomatis@chu-lyon.fr](mailto:melanie.tomatis@chu-lyon.fr))  
24

25 11 Benjamin Riche ([benjamin.riche@chu-lyon.fr](mailto:benjamin.riche@chu-lyon.fr))  
26

27 12 Béatrice Galamand ([beatrice.galamand@chu-lyon.fr](mailto:beatrice.galamand@chu-lyon.fr))  
28

29 13 Marion Granger ([mariongranger@outlook.fr](mailto:mariongranger@outlook.fr))  
30

31 14 Claire Barbavara ([claire.barbavara@gmail.com](mailto:claire.barbavara@gmail.com))  
32

33 15 Chrystelle Bourgeois ([cbourgeois@ch-annecygenevois.fr](mailto:cbourgeois@ch-annecygenevois.fr))  
34

35 16 Evelyne Genest ([evelyne.genest@chu-lyon.fr](mailto:evelyne.genest@chu-lyon.fr))  
36

37 17 Laetitia Stefani ([lstefani@ch-annecygenevois.fr](mailto:lstefani@ch-annecygenevois.fr))  
38

39 18 Max Haine ([mhaine@lhospitalnordouest.fr](mailto:mhaine@lhospitalnordouest.fr))  
40

41 19 Elisabeth Castel Kremer ([Elisabeth.castel-kremer@chu-lyon.fr](mailto:Elisabeth.castel-kremer@chu-lyon.fr))  
42

43 20 Isabelle Morel-Soldner ([isabelle.morel-soldner@chu-lyon.fr](mailto:isabelle.morel-soldner@chu-lyon.fr))  
44

45 21 Vincent Collange ([collangev@gmail.com](mailto:collangev@gmail.com))  
46

47 22 Olivia Le Saux ([Olivia.LESAUX@Lyon.unicancer.fr](mailto:Olivia.LESAUX@Lyon.unicancer.fr))  
48

49 23 David Dayde ([david.dayde@chu-lyon.fr](mailto:david.dayde@chu-lyon.fr))  
50

51 24 Claire Falandry ([claire.falandry@chu-lyon.fr](mailto:claire.falandry@chu-lyon.fr)) (Corresponding author)  
52  
53  
54  
55  
56  
57  
58  
59  
60

1  
2  
3 25 Corresponding email address: [claire.falandry@chu-lyon.fr](mailto:claire.falandry@chu-lyon.fr)  
4  
5  
6  
7  
8  
9  
10  
11  
12  
13  
14  
15  
16  
17  
18  
19  
20  
21  
22  
23  
24  
25  
26  
27  
28  
29  
30  
31  
32  
33  
34  
35  
36  
37  
38  
39  
40  
41  
42  
43  
44  
45  
46  
47  
48  
49  
50  
51  
52  
53  
54  
55  
56  
57  
58  
59  
60

For peer review only

## 26 Abstract

27 **Background:** Aging is associated with an increased prevalence of co-morbidities and sarcopenia and  
28 with a decline of functional reserve of multiple organ systems, eventually leading in the context of the  
29 disease and/or treatment-related stress to functional deconditioning or organ failure. The  
30 multicomponent intervention “PROADAPT” was built multi-professionally to implement  
31 prehabilitation in older cancer patients.

32 **Methods:** PROADAPT-pilot study is an interventional, non-randomized, prospective, multicenter  
33 study. It will include 122 patients oriented to complex medico-surgical curative procedures (major  
34 surgery or radiation therapy +/- chemotherapy). After informed consent, patients will undergo a  
35 comprehensive geriatric assessment and will be offered a prehabilitation kit “PROADAPT” including an  
36 advices booklet with personalized objectives and respiratory rehabilitation devices. Patients will then  
37 be called weekly and monitored for physical and respiratory rehabilitation, pre-operative re-nutrition,  
38 motivational counseling, and iatrogenic prevention. Six outpatient consultations will be planned at  
39 inclusion, few days before the procedure, at 1, 3, 6 and 12 months after the end of the procedure. The  
40 main outcome of the study is the feasibility of the intervention, defined as the ability to perform at  
41 least one of the components of the program. Clinical data collection will include patient-specific and  
42 cancer-specific characteristics.

43 **Ethics and dissemination:** Study protocol and several amendments were ethically approved by Ile de  
44 France 8 Ethics Committee on May 3, 2018. The results of the primary and secondary objectives will  
45 be published in peer-reviewed journals. ClinicalTrials registration: NCT03659123.

46 **Keywords:** oncogeriatrics, prehabilitation, motivation, sarcopenia, older cancer patients, care  
47 pathway.

## 49 Article summary

50 Strengths and limitations of this study

- 51 - PROADAPT program is a prehabilitation intervention specifically tailored for older cancer  
52 patients
- 53 - PROADAPT pilot trial is a prospective and multicentre trial designed to evaluate the feasibility  
54 of the intervention
- 55 - Different secondary outcomes including quality of life will be collected to better adapt the  
56 program to patients' specificities

- 1  
2  
3 57 - The main limitation of such an intervention is the risk of poor adherence of the patients to the  
4 program  
5 58  
6 59 - This non comparative study will appeal, if satisfactory, to randomized studies in the future.  
7  
8  
9  
10  
11  
12  
13  
14  
15  
16  
17  
18  
19  
20  
21  
22  
23  
24  
25  
26  
27  
28  
29  
30  
31  
32  
33  
34  
35  
36  
37  
38  
39  
40  
41  
42  
43  
44  
45  
46  
47  
48  
49  
50  
51  
52  
53  
54  
55  
56  
57  
58  
59  
60

For peer review only

## 60 Introduction

61 Many oncological situations involve complex medical-surgical procedures at risk of patient's  
62 deconditioning. Surgery or complex medico-surgical procedures can be considered as one proof-of  
63 principle of such risks, since major cancer surgery exposes the older population to a higher risk of  
64 morbi-mortality and unplanned hospitalization for geriatric events (1). Outpatient treatments and  
65 rapid post-operative rehabilitation strategies are used to decrease post-operative deconditioning but  
66 do not take geriatric risk factors into account. The deconditioning of older patients, not anticipated,  
67 can thus lead to prolonged and iatrogenic hospitalizations such as immobilization syndrome, acute  
68 confusion, undernutrition, falls, de novo urinary incontinence and adverse drug events, generating  
69 frustration, appeals by patients and their families and additional hospital costs.

70 In order to reduce complications after surgery, prehabilitation has often been considered, and it can  
71 be estimated that a majority of surgeons would accept a 4 weeks delay before surgery to improve  
72 older patients' outcomes if shown to be beneficial (2–9). However, the actual level of evidence  
73 depends on the interventions: high for pre-operative nutrition (10), but low for physical exercise, due  
74 to heterogeneous programs with often bad adherence (11). In addition, geriatric validated  
75 interventions, in order to prevent iatrogenic event, may be added in a multi-interventional model of  
76 intervention.

77 To date, the interventions likely to prevent geriatric deconditioning include nutritional care, pre-  
78 therapeutic (prehabilitation) and post-therapeutic (rehabilitation) physical reconditioning, iatrogenic  
79 prevention (drug and care system-related) and hospital-to-home transition to limit the risk of early  
80 readmission of patients. Nevertheless, the level of evidence for each of these care segments remains  
81 limited, and not specific to the oncogeriatric population. Indeed, studies about more specific care have  
82 already been carried out but do not consider all of the above interventions (12). Moreover, cancer in  
83 the older patient is often associated with comorbidities, particularly cardiovascular disease (13,14).  
84 The older population also has a higher risk of loss of autonomy and cognitive impairment, which can  
85 be increased with surgery (15–17). In response to the growing population of older cancer patients, a  
86 modification of oncological care and the implementation of specific geriatric interventions have been  
87 developed (18–20).

88 PROADAPT (Prehabilitation & Rehabilitation in Oncogeriatrics: Adaptation to Deconditioning risk and  
89 Accompaniment of Patients' Trajectories) is a geriatric intervention program constructed on a multi-  
90 professional and multi-disciplinary basis after a systematic analysis of published data. It includes: 1)  
91 before surgery: prehabilitation of patients, including nutritional, physical, respiratory and motivational  
92 counselling; 2) during hospitalisation for surgery (if performed): optimization of their treatment by  
93 pharmaceutical reconciliation, educational interventions, standardization of surgical interventions and

1  
2  
3 94 improved rehabilitation after surgery; 3) bridging and post-discharge interventions for hospital-to-  
4 home transition (table 1).  
5 95  
6 96  
7

## 8 97 **Methods and analysis**

### 10 98 **Objectives**

#### 11 99 *Primary objective*

12  
13 100 The primary objective of the PROADAPT pilot study is to assess the feasibility of the program, defined  
14 as the achievement of at least one item of the program during patient's follow up.  
15 101  
16 102

#### 17 103 *Secondary objectives*

18 104 The secondary objectives of the study are:

- 19 105 1) To assess the achievement of each item of the program independently of each other (rate of  
20 achievement of all or part of the instructions);
- 21 106 2) To assess patients' satisfaction with the program;
- 22 107 3) To estimate the rate of adherence to each item of the program during the various visits;
- 23 108 4) To appreciate the longitudinal evolution of health-related quality of life over 1 year.
- 24 109 5) To assess patients' post treatment complications according Clavien Dindo and NCI-CTC version  
25 4 scoring systems (21);
- 26 110 6) To estimate the rate and the nature of post-operative complications at 30 and 90 days;
- 27 111 7) To estimate the post-operative mortality at 30 and 90 days;
- 28 112 8) To estimate the costs of treatments (health system, patients);
- 29 113 9) To study the therapeutic strategies (treatment completion rate);
- 30 114 10) To estimate the progression-free survival rate at one year (PFS);
- 31 115 11) To estimate the overall survival rate at one year (OS);
- 32 116 12) To study the physical performance tests and the evolution of these performances through the  
33 proposed exercises;
- 34 117 13) To study the other dimensions of quality of life relating to health at 3 months;
- 35 118 14) To estimate the longitudinal evolution of QoL;
- 36 119 15) To estimate the tolerance of treatments;
- 37 120 16) To estimate the evolution of geriatric covariates.

### 38 121 **Study design**

1  
2  
3 125 PROADAPT - pilot phase is a second category interventional study involving the Human Person with  
4 126 minimal risks and constraints excluding health products. It is a prospective, non-randomized  
5 127 multicenter opened in different centers of Auvergne-Rhône-Alpes region, France (n=7).

### 8 9 128 **Study sites and participants**

10  
11 129 The study population will include older patients identified during multidisciplinary consultation  
12 130 meetings and oriented to complex medico-surgical curative procedures in the including centers (Lyon  
13 131 Sud Hospital, Croix Rousse Hospital and Edouard Herriot Hospital from the Hospices Civils de Lyon,  
14 132 Nord-Ouest Villefranche-sur-Saône Hospital, Annecy-Genevois Hospital, Chambéry Hospital, Lyon-  
15 133 Villeurbanne Médipôle).

16 134 Inclusion criteria are: patient aged 70 and over or 60 and over with significant comorbid condition  
17 135 (Cumulative Illness Rating Scale (CIRS-G)  $\geq 3$  (22)) or disability (ADL score  $< 6/6$  (23)), histologically or  
18 136 cytologically proven cancer, life expectancy  $> 3$  months planned for a complex medico-surgical  
19 137 procedure in a curative intent. Complex medico-surgical procedures are defined as major abdominal  
20 138 surgery (breast excluded) either minimally invasive or open.

21 139 Exclusion criteria are: patient with other malignancy within the last 5 years (except for adequately  
22 140 treated carcinoma in situ of the cervix or squamous carcinoma of the skin, or adequately controlled  
23 141 limited basal cell skin cancer), unable to be regularly followed for any reason (geographic, familial,  
24 142 social, psychologic) or with any mental or physical handicap at risk of interfering with the appropriate  
25 143 treatment.

26 144 A screening of older patients will be systematically performed during multidisciplinary meetings and  
27 145 described in the CONSORT diagram of the study.

### 28 146 **Intervention**

29 147 PROADAPT intervention program was built according to a multi-dimensional and multidisciplinary  
30 148 basis. From January 2016 to April 2018, nine regional meetings were organized, gathering 40  
31 149 representatives of the following medical and paramedical specialties: geriatricians, nutritionists,  
32 150 surgeons (subspecialties: gynaecology, digestive surgery, urology), oncologists, anaesthesiologists,  
33 151 nurses, physiotherapists, occupational therapists, adapted physical activity monitors. A systematic  
34 152 review of published data was done in the following axes, to provide a graded state-of-the-art: nutrition,  
35 153 physical activity, patient education, medication rationalization, cardiovascular optimization, transition  
36 154 and standardization of surgical procedures. Based on the qualitative grading of existing data, a  
37 155 modified DELPHI method was performed, to co-validate the content of the standardized intervention  
38 156 checklist, and the feasibility of the implementation of each point of this checklist (Table 1).



1  
2  
3 157 A PROADAPT booklet was built, to propose a standardized, adapted and evolutive tool designed to  
4  
5 158 explain physical exercise and nutrition counselling and to insure a follow-up of patients' day-to-day  
6  
7 159 achievements. This first version was tested by candidate patients during two turns of validation before  
8  
9 160 the validation of the current version 3 of the booklet.

10  
11 161 *PROADAPT standardized geriatric intervention program includes:*

12  
13 162 - Pre-operative physical activity including strength and endurance exercise +/- group activities  
14  
15 163 during 4 +/-2 weeks. Interventions with high level of evidence were retained, according to an ongoing  
16  
17 164 systematic analysis (<http://www.crd.york.ac.uk/PROSPERO> Ref CRD42020100110; (24,25)). Since the  
18  
19 165 intervention is expected to be performed in any health system context, with a vast majority of the  
20  
21 166 intervention to be performed at home, the content of the intervention was standardized and  
22  
23 167 presented in the booklet, but the conditions of the implementation were left to the investigator's  
24  
25 168 decision (physiotherapist intervention at home, group activities when available, etc...).

26  
27 169 - Nutrition: nutrition before and after physical activity, pre-postoperative immuno-nutrition +/-  
28  
29 170 artificial nutrition (ie enteral or parenteral nutrition) according international guidelines (10);

30  
31 171 - Patient (and caregiver) education and coaching (on nutrition, physical exercise) according to a  
32  
33 172 weekly schedule with the activation of integrated supports by hetero- and self-management (26);

34  
35 173 - Standardized intervention procedures, according to a checklist established in consensus with  
36  
37 174 surgeons' representatives;

38  
39 175 - Enhanced rehabilitation will be promoted according to international guidelines (27);

40  
41 176 - Pharmaceutical medication conciliation, treatment optimization, according to a centralized  
42  
43 177 process with pharmaceutical expertise.

44  
45 178 - Bridging interventions for hospital-to-home transition, according to a proposed standardized  
46  
47 179 procedure including training of dedicated nurses, and post-discharge phone-calls follow-up during 12  
48  
49 180 weeks after surgery. In practice, only 2 or 3 people from the coordination team are in charge of  
50  
51 181 coaching for all patients. In the future, a "special nurse coach" will be trained in each center and  
52  
53 182 responsible for patients' coaching. Interventions with high level of evidence were retained, according  
54  
55 183 to an ongoing systematic analysis (<http://www.crd.york.ac.uk/PROSPERO> Ref CRD42017055698).

56  
57 184 The intervention is designed to be implemented at different times of patients' care (table 1).

58  
59 185

60  
61 186 *During the prehabilitation time:*

62  
63 187 • A dedicated nurse, trained in patient education by the coordination team ("coaching nurse")  
64  
65 188 presents him/herself to the patient for:

66  
67 189 - Presentation of the program to the patient and his/her caregiver(s)

68  
69 190 - Personalization of the PROADAPT booklet (see after) to the patient's characteristics

1  
2  
3  
4  
5  
6  
7  
8  
9  
10  
11  
12  
13  
14  
15  
16  
17  
18  
19  
20  
21  
22  
23  
24  
25  
26  
27  
28  
29  
30  
31  
32  
33  
34  
35  
36  
37  
38  
39  
40  
41  
42  
43  
44  
45  
46  
47  
48  
49  
50  
51  
52  
53  
54  
55  
56  
57  
58  
59  
60

- 191 - Collection of personal data, nutritional and functional habits
- 192 - Evaluation of psycho-cognitive context using questionnaires (GDS4/GDS15, MNA,
- 193 MINI-COG)
- 194 - Gathering of the information needed: comorbidities, comedications (for transmission
- 195 to the centralized pharmaceutical expertise)
- 196 - Anticipation and organization of the future appointments (anesthesiologist,
- 197 stomatherapist, ...)
- 198 - A weekly visit or phone call according to a structured interview for health education
- 199 and transmission of nutritional and functional advices (see after)
- 200 • Nutritional care is based on:
  - 201 - A personalized evaluation of nutritional balance and nutritional needs of the patient
  - 202 according to dietician diagnosis based on measured intake and international
  - 203 recommendations
  - 204 - A weekly follow-up of weight and nutritional intake. If the coaching nurse identifies an
  - 205 unfavorable nutritional trend, she reports it to the referring physician and nutritionist.
  - 206 - Artificial nutrition if needed according ESPEN recommendations (10,28,29)
  - 207 - Pre-operative immune-nutrition during 7 days before surgery (29)
- 208 • Total-body rehabilitation:
  - 209 - 2 to 3 times a week: strength exercise (each time with dedicated exercises for upper
  - 210 members, legs and abs, 20 to 45 minutes each sequence)
  - 211 - 2 to 3 times a week: endurance exercise (walk or cycle ergometer), 20 to 45 min each
  - 212 sequence
  - 213 - 3 times a day: respiratory physiotherapy
  - 214 - Once a week (if possible): group activities (according to the center organization and
  - 215 home-hospital distance)
- 216 • Pharmaceutical conciliation and optimization according to STOPP/START criteria and
- 217 international recommendations about peri-operative care (30): to be transmitted to the surgical and
- 218 anesthesia team without any obligation.
- 219
- 220 *During peri-operative time*
- 221 • The coaching nurse contacts the surgical team for transmission of:
  - 222 o patient's personal data
  - 223 o physical (nutritional, functional and/or comorbidities) as well as psychological
  - 224 difficulties
  - 225 o medication conciliation results

1  
2  
3 226

4  
5 227 *During rehabilitation time*

- 6 228 • The coaching nurse contacts the rehabilitation team for transmission of:
- 7  
8 229 o patient's personal data and care course
- 9  
10 230 o physical (nutritional, functional and/or comorbidities) as well as psychological
- 11 231 difficulties
- 12  
13 232 o medication conciliation results
- 14  
15 233 • The rehabilitation program is left at the discretion of the rehabilitation team (standard care
- 16 234 and local habits).
- 17  
18 235 • A weekly phone call of the coaching nurse to the rehabilitation team for nutritional and
- 19  
20 236 functional follow-up as well as medication conciliation

21 237

22  
23 238 *During hospital-home transition time*

- 24  
25 239 • The coaching nurse contacts the patient's general practitioner for transmission of:
- 26 240 o patient's personal data and care course
- 27  
28 241 o physical (nutritional, functional and/or comorbidities) as well as psychological
- 29 242 difficulties
- 30  
31 243 o medication conciliation results
- 32  
33 244 • Bi-weekly phone call of the coaching nurse to the patient for nutritional and functional follow-
- 34  
35 245 up
- 36  
37 246 • Advices for optimization of symptoms management: abdominal pain, nausea, vomiting...

38 247

39  
40  
41 248 **Participant timeline**

42  
43 249 Six successive evaluations are planned for the participants.

44  
45 250 *The inclusion visit* is planned during a geriatric consultation planned before the start day of the complex

46 251 medico-surgical procedure, at least 7 days before start date. If the start date is delayed for any reason

47  
48 252 or the patient is included into a neo-adjuvant treatment, the prehabilitation time may be prolonged

49  
50 253 until 9 months. In that case, the frequency of the phone calls is decreased (from 1/week to 1/month)

51  
52 254 after 4 weeks. During the inclusion visit, lasting about 1 hour, the following steps are planned:

- 53  
54 255 - Clinic (blood pressure, heart rate, ECOG scale(31), patient's comorbidities), biologic (albumin,
- 55 256 prealbumin, C-reactive protein) and paraclinic (year of birth, gender, weight, height, body
- 56  
57 257 mass index, weight evolution over the last 3 and 6 months) data collection
- 58  
59 258 - All concomitant treatments and drug conciliation
- 60

- 1  
2  
3 259 - The history of the disease (primitive site, metastasis, histology of the initial tumor, presence  
4 of tumor markers)  
5 260  
6 261 - Radiological disease assessments (date and nature)  
7  
8 262 - A standardized geriatric assessment using validated questionnaires with a particular attention  
9 on physical activity and nutrition (ADL(23)/IADL(32), G8 (33), Rapid Assessment of Physical  
10 263 Activity (RAPA) (34), AIPVQ (35), EORTC QLQ-C30 (36), EORTC QLQ-ED14 (37), EQ-5D-3L (38),  
11 264 Short Form Health Survey in 36-items (SF-36) (39), Short Physical Performance Battery (SPPB)  
12 265 (40), Fatigue Severity Scale (FSS) (41), Mini-Nutritional Assessment (MNA) (42), Geriatric  
13 266 Depression Scale (GDS4/GDS15) (43), MINI-COG (44), Tinetti test (45), Borg scale (46), Pain  
14 267 scale (47), Nutrition scale (48)) (**Error! Reference source not found.**tables 2 and 3).  
15  
16 268  
17  
18 269 - Delivery of the “PROADAPT kit” device during a meeting with a dedicated paramedic (nurse,  
19 270 physiotherapist, ergotherapist...) in order to:  
20  
21  
22 271  
23 272  
24 273  
25 274  
26 275  
27 276  
28 277  
29 278  
30 279  
31 280  
32 281  
33 282  
34 283  
35 284  
36 285  
37 286  
38 287  
39 288  
40 289  
41 290  
42 291  
43 292  
44 293
- Provide to the patient VOLDYNE® and TRIFLO® devices for inspiratory training
  - Present the PROADAPT booklet that includes a battery of exercises and nutritional counselling specifically designed for this older population:
    - muscle strengthening of upper limbs (6 exercises, 3 difficulty levels), lower limbs (6 exercises, 3 difficulty levels), abdominal wall (4 exercises, 3 difficulty levels) (objective: 2 to 3 sessions per day for a total time between 20 and 45 minutes)
    - endurance/aerobic activities (7 exercises, 3 difficulty levels with 3 duration objectives, objective: every day)
    - inspiratory training with VOLDYNE® and TRIFLO® devices (objective: 3 sessions per day for a total time of 30 minutes)
    - general nutritional counselling adapted to the older population: food enrichment, inter-meals collations, oral nutritional supplements.
  - A fulfilling of 3-day food statement allows, in the 7 days after inclusion, to deliver a dietician-driven personalized nutritional counseling. If needed, in case of unfavorable nutritional parameters, artificial nutrition is introduced.
  - Delivery, if needed, of medical prescription:
    - o for home physiotherapy according PROADAPT program for respiratory training sessions and physical activity training sessions
    - o For oral nutritional supplements
    - o For usual medicines, including pharmaceutical review
  - For patients requiring inpatient follow-up, hospital admission for a few days in a rehabilitation unit for a physiotherapeutic program and/or artificial nutrition (enteral preferred).

294 During pre-intervention time, phone calls are planned by a dedicated paramedic (once a week for the  
295 first 4 weeks and then once a month until the intervention). Calls are semi-directed interviews focused  
296 on the patient's autonomy, physical activity, appetite and sleep over the last period (week/month). A  
297 special attention is paid on encouraging patient's motivation and adherence to the program.

298 *The pre-therapeutic visit* is scheduled when possible between 5 days and the day of the intervention.  
299 This visit is performed in the surgery or radiotherapy unit only if the visit is necessary before the  
300 intervention still without modifying the standard therapeutic care for:

- 301 - Clinic, biologic and paraclinic data collection
- 302 - All concomitant treatments and drug conciliation
- 303 - Questionnaires about pain, nutrition, fitness and physical tests (table 2 and 3)
- 304 - Therapeutic care data collection (date, nature, entitled, reason)

305 During post-intervention time, paramedics trained in clinical research will resume follow-up calls as  
306 before the intervention once a week during 12 weeks after D0 and once a month up to 12 months after  
307 D0. The D0 date is determined as the last day of surgery (day of the last resumption of surgery in the  
308 limit of 30 days after the first intervention) or the last day of the radiotherapy. For weekly calls, a  
309 margin of +/- 2 days is allowed and for monthly calls, a margin of +/- 7 days is allowed.

310 *Visits at 1, 3 and 6 months after the intervention (+/- 7 days):* The patient may have started an  
311 antineoplastic treatment according to standard of care. The visit could be performed with the surgeon,  
312 the radiotherapist or the oncologist according local habits:

- 313 - Clinic (blood pressure, heart rate, ECOG scale(31)), biologic (albumin, prealbumin, C-reactive  
314 protein) and paraclinic (weight, body mass index) data collection
- 315 - All concomitant treatments and drug conciliation
- 316 - Patient care data (surgery and complications, treatment for the cancer)
- 317 - Radiological disease assessments (date and nature)
- 318 - Questionnaires about quality of life, pain, nutrition, fitness and physical tests (table 2 and 3)
- 319 - Socio-economic assessment with patient's care data (date, nature of acts, designation, reason)

320 *The end of study visit* is planned at 12 months (per-protocol) or at the date of trial premature  
321 discontinuation (+/- 7 days) for a final assessment of the same outcomes as previously listed. When  
322 requested, if previous visits were omitted, a final assessment of all the complications during the post-  
323 therapeutic period is performed.

## 324 **Outcomes and measurements**

1  
2  
3 325 **Primary outcome**  
4

5 326 The main outcome measure will be the percentage of patients who have completed at least one item  
6  
7 327 in the PROADAPT program after 12 months after the start of therapeutic treatment. The start of  
8  
9 328 treatment is defined in this study by the last day of surgery (date of the last recovery within the limit  
10  
11 329 of 30 days after the date of the initial intervention) or the last day of radiotherapy. The workshops of  
12  
13 330 the program are:

14 331 - Physical and respiratory rehabilitation

15 332 - Re-nutrition session

16 333 - Telephone nurse follow-up  
17  
18  
19 334

20  
21 335 **Secondary outcomes**  
22

23 336 The secondary outcomes of the study are:

24  
25 337 - To evaluate the feasibility of each stage of the program independently of each other (rate of  
26  
27 338 achievement of all or part of the instructions)

28  
29 339 ○ Pre-operative physical rehabilitation including (figure 1):

30 340 ● Muscle strengthening

31  
32 341 ● Respiratory rehabilitation

33  
34 342 ● Endurance work

35 343 ○ Pre-operative nutrition counselling (figure 1)

36  
37 344 ○ Drug reconciliation / iatrogenic prevention

38  
39 345 ○ Pre-therapeutic follow-up calls

40  
41 346 ○ Post-surgery or post-radiotherapy follow-up calls  
42  
43 347

44 348 - To estimate patients' satisfaction with the overall program, at the end of the study (end of follow-up  
45  
46 349 or study discontinuation) using a questionnaire (Supplemental material).

47  
48 350 - To estimate the rate of adherence to the items (physical activity, nutrition and nursing follow-up)  
49  
50 351 during follow-up time. To evaluate this criterion, various parameters will be recorded: physical activity  
51  
52 352 duration (in h/week), kinetics (duration (% increase), level of difficulty), respiratory activity, food intake  
53  
54 353 during phone calls.

55 354 - To assess the longitudinal evolution over 1 year of:

56  
57 355 ○ patient's physical performance (SPPB, gait speed, TUG test) and functional independence on  
58  
59 356 ADL (23), IADL (32), AIPVQ (49)

60 357 ○ nutritional parameters of the patient (weight, albuminemia, appetite)

- 1  
2  
3 358 ○ health-related quality of life for patients based on QLQ-C30 and ELD14 (5 dimensions: mobility,  
4 359 disease burden, emotional and physical functioning, tiredness) (50,51)  
5  
6 360 ○ pharmaceutical conciliation  
7  
8 361

9  
10 362 In parallel to these secondary objectives, a series of parameters will be measured and monitored in  
11 363 order to:

- 12  
13 364 - Estimate the rate and nature of post-operative complications at 30 days (NCI-CTCAE)  
14  
15 365 - Estimate the rate and nature of post-operative complications according to the CCI at 30 and 90 days  
16  
17 366 - Estimate post-operative mortality at 30 and 90 days  
18  
19 367 - Estimate the overall one-year survival rate (OS)  
20  
21 368 - Estimate the one-year progression-free survival rate (PFS)  
22  
23 369 - Estimate the longitudinal evolution of QoL according to QLQ C30, ELD14, EQ-5D  
24  
25 370 - Estimate treatment costs (health system, patients)  
26  
27 371 - Study therapeutic strategies (treatment completion rate)  
28  
29 372 - Estimate the evolution of geriatric covariates.  
30

31

### 374 **Sample size calculation**

32  
33 375 The program will be considered feasible, at the patient level, if all or part of the program is  
34 376 implemented in at least 50 % of the included patients (= alternative hypothesis). This threshold was  
35 377 defined in line with previous studies on prehabilitation for older cancer patients, that showed  
36 378 compliance rates between 16 and 95% (52,53). Considering that PROADAPT program is highly complex  
37 379 even if tailored for older patients, we anticipate modest compliance rates.

40  
41  
42 380 The calculation of the required sample size was done as follows: to reject the null hypothesis of the  
43 381 program feasibility rate lower than 35 %, with a bilateral alpha error risk of 5 % and a statistical power  
44 382 of 90 % (beta=10 %), the number of required patients to be analyzed is 111. Including 10 % non-  
45 383 treatable patients, a total of 122 patients should be included.

### 49 384 **Data management and statistical analyses**

50  
51 385 Data are monitored by a clinical research associate (CRA). Inconsistencies will be reported to the study  
52 386 investigators in order to decide whether the data should be corrected or considered as missing data.

53  
54 387 Any changes in the data will be reported.

55  
56 388 Data analyses will be performed by the data management and analysis centre. The analyses will be  
57 389 carried out by an independent statistician with the latest version of the R software environment and  
58  
59 390 SAS software version 9.4.  
60

1  
2  
3 391 All of the characteristics collected will be subjected to a descriptive analysis.  
4  
5 392

6  
7 393 ***Descriptive analyses***  
8

9 394 A flow-chart diagram will describe the data available for the patient population at baseline, and during  
10  
11 395 each follow-up visit. Eligibility criteria for treated patients will be verified, as well as follow-up and end  
12  
13 396 of study visits. Reasons for premature end of study will be provided.  
14

15 397 Characteristics of the study population and proportions of missing values will be reported. Patient  
16  
17 398 characteristics will be described using mean and standard deviation or median and interquartile range  
18  
19 399 for quantitative variables, and frequencies and distribution for categorical variables. A comparison of  
20  
21 400 baseline characteristics between patients with complete follow-up and those with attrition will be  
22  
23 401 performed. If needed, methods for handling missing data (multiple imputation, mixed model or  
24  
25 402 auxiliary variable) will be used when appropriate.  
26

27 403  
28 404 ***Primary analysis***

29  
30 405 The number and percentage of patients who have completed at least one PROADAPT program activity  
31  
32 406 at the end of 12 months after the start of treatment will be reported. All included patients will be  
33  
34 407 analysed in the primary analysis as intention to treat, defined as all included patients with or without  
35  
36 408 the respect of the eligibility criteria and whatever the respect or not of the intervention.  
37

38 409 ***Secondary analyses***

39 410 **Time-to-event variables: follow-up, overall survival, progression free survival**

40  
41  
42 411 The proportion of events at specific measurement times will be estimated according to the Kaplan-  
43  
44 412 Meier curve. Medians of event-free survival will be reported by treatment arm with its 95 % confidence  
45  
46 413 interval (95 % CI), if the number of events allows estimation of the median.  
47

48 414 Overall survival rate and progression free survival rate at 12 months (after the day of the last revision  
49  
50 415 of surgery or the last day of radiotherapy) will be provided with 95 % CI.

51 416 **Quality of life**

52  
53  
54 417 Analyses of the QoL data will be performed with modified intention to treat (mITT) population, i.e.  
55  
56 418 including all included patients with at least a QoL score available at baseline. Patients' quality of life,  
57  
58 419 linked to health, will be analysed after 3 months through 4 targeted dimensions: mobility, disease  
59  
60 420 burden, emotional and physical functioning. All other dimensions will be analysed as exploratory



1  
2  
3 421 purpose only. QoL scores will be described at baseline and at 3 months using the mean and standard  
4 422 deviation or median and range. Mean difference between baseline and 3 months will be reported with  
5 423 its 95% confidence interval. A 10-point difference will be considered as the minimal important  
6 424 difference for each score of the EORTC questionnaires.  
7  
8  
9

#### 10 425 **Longitudinal follow-up**

11  
12 426 Covariates planned to be repeatedly tested during entire 1-year follow up will help analysing the  
13 427 resilience concept ie the ability and the celerity with which one individual will recover to his baseline  
14 428 level (54). Will be included in such analyses the covariates evaluating functional and physical  
15 429 performance levels (SPPB, gait speed, TUG test, ADL, IADL, AIPVQ), nutritional parameters (weight,  
16 430 albuminemia, appetite), and health-related quality of life. The longitudinal changes of these variables  
17 431 will be analysed using linear mixed models (55). A “time-to-recovery” composite endpoint will be also  
18 432 proposed as exploratory, defined as the time to complete functional and nutritional recovery of the  
19 433 patients, a construction similar to the “Time to deterioration” composite endpoint proposed in the  
20 434 oncologic field (56).”  
21  
22  
23  
24  
25  
26  
27  
28

#### 29 435 **Data monitoring**

30 436  
31 437 The successful completion of the database is ensured by the hospital CRA. The hospital CRA also  
32 438 ensures compliance with the study protocol. The sponsor CRA verifies that the rights of the participants  
33 439 are respected.  
34  
35  
36  
37

#### 38 440 **End of protocol**

39 441  
40 442 Patients leave the study either on a per-protocol basis during the “end of study visit” on month 12  
41 443 after the intervention or at any time during the conduct of the study if they no longer wish to  
42 444 participate. However, as indicated in the information letter to the patients/caregivers, the data  
43 445 collected before exclusion may be used as part of the study.  
44  
45  
46  
47

#### 48 446 **Confidentiality**

49 447  
50 448 Correspondence tables will be kept in a separate file that does not contain clinical data. The access to  
51 449 the nominative information is protected by a password and confidentiality is guaranteed by the study.  
52  
53  
54  
55

#### 56 450 **Protocol amendments**

57 451  
58  
59  
60

1  
2  
3 452 Any important modifications requiring a new ethics committee approval will be communicated in  
4 453 future publications. Any potential impact of protocol modifications on the results will be discussed as  
5 454 appropriate.  
6  
7

8 455

9  
10 456 ***Trial status***

11  
12 457 Patient enrolment began on July 3, 2018. Data are collecting.  
13  
14 458

15 459 ***Patients' and public involvement***

16  
17  
18 460 Patients were involved at different steps of the trial: (i) during PROADAPT booklet conception, several  
19 461 (30) patients were asked to answer an anonymous questionnaire in order to improve its ergonomics;  
20 462 (ii) the information note and consent form of the protocol have been re-read by the patients' review  
21 463 committee of the Ligue Nationale de Lutte contre le Cancer (a French association of cancer patients).  
22  
23 464

24  
25  
26 465 **Discussion**

27  
28  
29 466 **Discussion of the intervention**

30  
31 467 Prehabilitation has long been conceptualized as an effective means of improving the functional  
32 468 capacity of the individual to enable him to resist various stressors. Originally developed in the military  
33 469 as the association of physical training to improve strength and endurance, improving nutritional intake  
34 470 and general education (57), it has been transposed into medicine and major surgery – initially when  
35 471 an ICU admission is planned - at the beginning of this century (58).  
36  
37  
38  
39

40 472 Despite a growing interest in the medical community for prehabilitation and particularly cancer  
41 473 prehabilitation, the level of evidence for specific interventions stays too low to be implemented in  
42 474 common care. Among the main disadvantages of published data include the heterogeneity of  
43 475 programs, sometimes poor patient adherence and the fact that most studies were small pilot studies  
44 476 developed for patients more fit and younger than those who should make the best part of  
45 477 prehabilitation. Another point to emphasize is that most programs include only one intervention -  
46 478 physical, nutritional, or psychological rehabilitation - when multimodal interventions are often  
47 479 considered to be more effective in older populations.  
48  
49  
50  
51  
52  
53

54 480 Considering these points, the PROADAPT intervention was developed according to an innovative  
55 481 management strategy since it started in 2016 by multi-professional meetings conceived as  
56 482 brainstorming sessions in order to develop a multidisciplinary program dedicated to prehabilitation  
57 483 and follow-up of older patients. The multidisciplinary conception of the intervention, the particular  
58  
59  
60

1  
2  
3 484 attention paid to older patients' specificities and the previous experience of the participants in as  
4  
5 485 various fields as patients' education, cognition, physiotherapy were hopefully the warrants of the most  
6  
7 486 tailored approach to the target population. For example, the booklet typography was of big character  
8  
9 487 font and the illustrations highly schematic with high contrast. Each sentence was verified by a panel of  
10  
11 488 patients in order to insure proper understanding. Finally, the booklet was evaluated by 30 patients,  
12  
13 489 with a high rate of satisfaction (Ravot et al, PROADAPT Pilot trial: A survey on patients' expectations  
14  
15 490 and satisfaction, unpublished data).

16 491 The fact that the PROADAPT intervention was constructed as an outpatient program may be  
17  
18 492 considered as at risk of poor and heterogeneous supervision of the physical exercises. However, this  
19  
20 493 limitation is balanced by a weekly phone calls to the patients, able to evaluate partially patients' skills  
21  
22 494 and motivation for the program. In addition, such design allows to neutralize somehow the  
23  
24 495 consequences of any inequalities or heterogeneity arising from the health system. As an example,  
25  
26 496 PROADAPT pilot study was able, during the last months, to maintain accrual and patients' coaching  
27  
28 497 and follow up, despite sudden closing of geriatric wards and surgical rooms during COVID pandemic.

29 498 This pilot study is the first step towards an ambitious program, since PROADAPT program will be  
30  
31 499 declined in the future into two randomized studies, PROADAPT-ovary/EWOC-2 (NCT04284969) and  
32  
33 500 PROADAPT sus-mesocolic, designed to evaluate the impact of PROADAPT program on post-treatment  
34  
35 501 complications versus common care. In order to favor patients' compliance and follow-up, an eHealth  
36  
37 502 tool has been developed that will help supervising patients' care courses.

### 37 503 **Discussion of the study design**

38  
39 504 In line with the previous points, this pilot study was designed in order to answer to this critical  
40  
41 505 question: is a multidomain prehabilitation program feasible in an older cancer population? This  
42  
43 506 question encompasses several points: (i) Is the program physically adapted to an older population? (ii)  
44  
45 507 Is such a program applicable in ambulatory care? (iii) How to build pedagogic tools adapted for such  
46  
47 508 ambulatory use? (iv) Are such pedagogic tools understandable? (v) What is the compliance of the  
48  
49 509 patients for each domain of the intervention program?... Another point is to know whether the  
50  
51 510 patient's care team is expected to accept such intervention, but this point was previously evaluated by  
52  
53 511 Ghignone et al. They demonstrated through an international survey that surgeons are generally in  
54  
55 512 favor for such programs since 71 % of them would accept to prehabilitate their elderly patients 4 weeks  
56  
57 513 before surgery, if such intervention is proven to be effective (2). Nevertheless, the participation of  
58  
59 514 surgeons and anesthesiologists during initial brainstorming sessions was of major interest since they  
60  
515 enriched a lot the structure of the program.

1  
2  
3 516 Thus, the construct of this trial may appear as highly complex with overabundant secondary endpoints,  
4  
5 517 but this design encompasses as much as possible the complexity of prevention care in an older  
6  
7 518 population, which has to mix the adaptation to the target population and the ability to maintain  
8  
9 519 compliance over time.

10  
11 520

## 12 13 521 **Ethics and dissemination**

14  
15 522 The study sponsor is the Hospices Civils de Lyon, responsible for study insurance and  
16  
17 523 pharmacovigilance. The study protocol was approved by the Ile de France 8 Ethics Committee on May  
18  
19 524 3, 2018 and cover all sites involved in this study. Several amendments have been added to the first  
20  
21 525 version of the protocol. The initial approved version was V2 of May 28, 2018, then the amended  
22  
23 526 versions were as follows: V3 of October 23, 2018 (change in the recruitment period, addition of new  
24  
25 527 investigation centers), V4 of May 17, 2019 (request for an additional 12 months extension, update with  
26  
27 528 the GDPR and update of the patient booklet), V5 of July 17, 2020 (addition of a cohort of 30 patients  
28  
29 529 to test the follow-up program with an e-health interface, request for an additional 8 months  
30  
31 530 extension). Current version is the V5 of July 17, 2020, authorized on September 10, 2020. The research  
32  
33 531 will be carried out in accordance with the Helsinki Declaration and ICH GCP Guidelines. Trial protocol  
34  
35 532 fulfills SPIRIT 2013 checklist (Supplementary table 1) and World Health Organization Trial Registration  
36  
37 533 Data Set (Supplementary table 2). The study complies with the principles of the data protection act in  
38  
39 534 France and with the General Data Protection Regulations in force in Europe. Each investigator must  
40  
41 535 collect a written consent at the beginning of the procedure. This consent is retained in the patient's  
42  
43 536 medical chart. The patient can stop the study at any time with an oral information at his investigator  
44  
45 537 or clinical research assistant. Patients will be informed on additional amendments according the law  
46  
47 538 in force.

48  
49 539 The results of the primary and secondary objectives will be published in peer-reviewed journals. All  
50  
51 540 authors of future publications will have to meet the criteria for authorship stated in the Uniform  
52  
53 541 Requirements for Manuscripts Submitted to Biomedical Journals by the International Committee of  
54  
55 542 Medical Journal Editors.

56  
57 543

58 544 Total words count : 5161

59  
60 545

## 61 546 **Abbreviations**

1  
2  
3 547 ADL: Activities of Daily Living; AIPVQ: Physical Instrumental activities of daily living (in French: Activités  
4 Instrumentales Physiques de la Vie Quotidienne); CRA: Clinical Research Assistant; ESPEN: European  
5 548 Society for Clinical Nutrition and Metabolism; FSS: Fatigue Severity Scale; GDS: Geriatric Depression  
6 549 Scale; IADL: Instrumental Activities of Daily Living; ICU: Intensive Care Unit; mITT:Modified Intention  
7 550 To Treat; MNA: Mini Nutritional Assessment; QLQ: Quality of Life Questionnaire; QoL: Quality of Life;  
8 551 RAPA: Rapid Assessment of Physical Activity; SF: Short Form Health Survey in 36 items; SPPB: Short  
9 552 Physical Performance Battery  
10 553  
11  
12  
13  
14  
15  
16  
17

## 18 555 **Declarations**

19  
20 556

## 21 22 557 **Acknowledgements**

23  
24  
25 558 This pilot protocol is part of the PROADAPT initiative for improving care for older people with cancer  
26 559 and takes part to the FHU-OncoAge consortium ([www.oncoage.org](http://www.oncoage.org)). The authors wish to thank the  
27 560 professionals who participated to the intervention conception: G. Albrand, D. Barnoud, D. Benayoun.  
28 561 B Billod, J. Bonhomme, A.-L. Bres, C. Brunengo, A. Chanelière, D. Charlety, Y. Chauleur, G. Copaescu,  
29 562 H. Curé, A.-M. Dascalita, B. De La Vigerie, S. Ducoulombier, O. Ganne, F. Gervais, T. Gilbert, M. Giroud,  
30 563 N. Jomard, C. Lecardonnel, B. Leroy, J.-A. Long, A. Marion, E. Nony, S. Parent, A. Pelisset-Vanhersecke,  
31 564 A. Pirollet, J.-E. Terrier, J. Trautmann, M.-A. Vincent.

32  
33  
34  
35  
36  
37 565 The authors also acknowledge the teams of Lyon Sud Hospital, Edouard Herriot Hospital of Lyon, Croix  
38 566 Rouse Hospital of Lyon, Annecy Genevois Hospital Center, Hôpital Nord Ouest hospital center,  
39 567 Chambéry Hospital Center and Médipôle Lyon-Villeurbanne who contribute to patient enrollment in  
40 568 this study and Thomas Gilbert for a friendly reviewing of the manuscript.

41  
42  
43  
44  
45 569 The authors would like to thank the patients' review committee of the Ligue Nationale de Lutte contre  
46 570 le Cancer for the valuable editing of the information note and the consent form.

## 47 48 49 571 **Funding**

50  
51 572 This work was supported by the Agence Régionale de Santé (ARS) Auvergne Rhône Alpes, through the  
52 573 call for projects "Innovate in health for the Auvergne Rhône Alpes region" jointly organized by the ARS,  
53 574 Bpifrance, the Auvergne Rhône Alpes region, URIOPASS, ORAIDA and Cluster I-care and the decision of  
54 575 the selection committee on June 27, 2016 (Grant N°2016-149). It provided funding for nurses,  
55 576 dieticians, physiotherapists, and clinical research assistants.

## 56 57 58 59 60 577 **Availability of data and materials**

1  
2  
3 578 The final dataset of the PROADAPT pilot study will be available on reasonable request after publication  
4 of the primary objective. Data requests can be submitted to the corresponding author.  
5 579

6  
7 580 **Competing interest**  
8

9 581 The authors declare that they have no competing interests.  
10

11  
12 582 **Consent for publication**  
13

14 583 Not applicable  
15

16 584 **Author contributions**  
17

18  
19 585 All authors participated to the PROADAPT intervention conception. Study protocol was conceived by  
20 586 DD, CF, CG, SPB, OLS, AM, VP and CR. DD and CF assumed fundraising and grant follow-up. MR led the  
21 587 drafting of the manuscript. All authors (MR, CR, AM, SPB, CG, VP, MT, BR, BG, MG, Cba, CBo, EG, LS,  
22 588 MH, ECK, IMS, VC, OLS, DD and CF) critically reviewed and approved the final version of the protocol.  
23  
24  
25

26 589  
27  
28  
29  
30  
31  
32  
33  
34  
35  
36  
37  
38  
39  
40  
41  
42  
43  
44  
45  
46  
47  
48  
49  
50  
51  
52  
53  
54  
55  
56  
57  
58  
59  
60

For peer review only

590 **References**

- 591 1. Tan H-J, Saliba D, Kwan L, Moore AA, Litwin MS. Burden of Geriatric Events Among Older Adults  
592 Undergoing Major Cancer Surgery. *J Clin Oncol*. 2016 Oct 4;34(11):1231–8.
- 593 2. Ghignone F, van Leeuwen BL, Montroni I, Huisman MG, Somasundar P, Cheung KL, et al. The  
594 assessment and management of older cancer patients: A SIOG surgical task force survey on  
595 surgeons' attitudes. *Eur J Surg Oncol EJSO*. 2016 Feb;42(2):297–302.
- 596 3. Thomas G, Tahir MR, Bongers BC, Kallen VL, Slooter GD, van Meeteren NL. Prehabilitation  
597 before major intra-abdominal cancer surgery: A systematic review of randomised controlled  
598 trials. *Eur J Anaesthesiol*. 2019;36(12):933–45.
- 599 4. Carli FMMp, Bousquet-Dion G, Awasthi R, Elsherbini N, Liberman S, Boutros M, et al. Effect of  
600 Multimodal Prehabilitation vs Postoperative Rehabilitation on 30-Day Postoperative  
601 Complications for Frail Patients Undergoing Resection of Colorectal Cancer: A Randomized  
602 Clinical Trial. *JAMA Surg*. 2020 Mar;155(3):233–42.
- 603 5. Bongers BC, Klaase JM, Meeteren NLU van. Prehabilitation vs Postoperative Rehabilitation for  
604 Frail Patients. *JAMA Surg*. 2020 Sep 1;155(9):896–7.
- 605 6. Cooper L, Frain L, Jaklitsch MT. Prehabilitation vs Postoperative Rehabilitation for Frail Patients.  
606 *JAMA Surg*. 2020 Sep 1;155(9):898–9.
- 607 7. Kako JMhsRO, Kajiwarra K, Tatematsu N. Prehabilitation vs Postoperative Rehabilitation for Frail  
608 Patients. [Letter]. *JAMA Surg*.
- 609 8. Keller DS, Carter B, Moug SJ. Prehabilitation vs Postoperative Rehabilitation for Frail Patients.  
610 *JAMA Surg*. 2020 Sep 1;155(9):896–896.
- 611 9. Carli F, Bousquet-Dion G, Fiore JF. Prehabilitation vs Postoperative Rehabilitation for Frail  
612 Patients. *JAMA Surg*. 2020 Sep 1;155(9):899–900.
- 613 10. Arends J, Bachmann P, Baracos V, Barthelemy N, Bertz H, Bozzetti F, et al. ESPEN guidelines on  
614 nutrition in cancer patients. *Clin Nutr [Internet]*. 2016 Aug 6 [cited 2016 Nov 20];0(0). Available  
615 from: [http://www.clinicalnutritionjournal.com/article/S0261-5614\(16\)30181-9/abstract](http://www.clinicalnutritionjournal.com/article/S0261-5614(16)30181-9/abstract)
- 616 11. Singh F, Newton RU, Galvão DA, Spry N, Baker MK. A systematic review of pre-surgical exercise  
617 intervention studies with cancer patients. *Surg Oncol*. 2013 Jun 1;22(2):92–104.
- 618 12. Craig P, Dieppe P, Macintyre S, Michie S, Nazareth I, Petticrew M. Developing and evaluating  
619 complex interventions: the new Medical Research Council guidance. *BMJ*. 2008 Sep  
620 29;337:a1655.
- 621 13. Ferlay J, Soerjomataram I, Ervik M, Dikshit R, Eser S, Mathers C, et al. GLOBOCAN 2012 v1.0,  
622 Cancer Incidence and Mortality Worldwide: IARC CancerBase No. 11 [Internet] [Internet]. Lyon,  
623 France: International Agency for Research on Cancer; 2013 [cited 2016 Sep 4]. Available from:  
624 Available from: <http://globocan.iarc.fr>
- 625 14. Koene RJ, Prizment AE, Blaes A, Konety SH. Shared Risk Factors in Cardiovascular Disease and  
626 Cancer. *Circulation*. 2016 Mar 15;133(11):1104–14.

- 1  
2  
3 627 15. Sjölund B-M, Wimo A, Qiu C, Engström M, von Strauss E. Time trends in prevalence of activities  
4 628 of daily living (ADL) disability and survival: Comparing two populations (aged 78+ years) living in  
5 629 a rural area in Sweden. *Arch Gerontol Geriatr*. 2014 May;58(3):370–5.
- 7 630 16. Sjölund B-M, Wimo A, Engström M, Strauss E von. Incidence of ADL Disability in Older Persons,  
8 631 Physical Activities as a Protective Factor and the Need for Informal and Formal Care – Results  
9 632 from the SNAC-N Project. *PLoS ONE* [Internet]. 2015 [cited 2016 Sep 4];10(9). Available from:  
11 633 <https://www.ncbi.nlm.nih.gov/pmc/articles/PMC4583409/>
- 13 634 17. Jagger C, Gillies C, Moscone F, Cambois E, Van Oyen H, Nusselder W, et al. Inequalities in  
14 635 healthy life years in the 25 countries of the European Union in 2005: a cross-national meta-  
15 636 regression analysis. *The Lancet*. 2008 Dec 20;372(9656):2124–31.
- 17 637 18. Extermann M, Meyer J, McGinnis M, Crocker TT, Corcoran MB, Yoder J, et al. A comprehensive  
18 638 geriatric intervention detects multiple problems in older breast cancer patients. *Crit Rev Oncol*  
19 639 *Hematol*. 2004 Jan;49:69–75.
- 21 640 19. Repetto L, Fratino L, Audisio RA, Venturino A, Gianni W, Vercelli M, et al. Comprehensive  
22 641 geriatric assessment adds information to Eastern Cooperative Oncology Group performance  
23 642 status in elderly cancer patients: an Italian Group for Geriatric Oncology Study. *J Clin Oncol*.  
24 643 2002 Jan 15;20:494–502.
- 27 644 20. Caillet P, Canoui-Poitrine F, Vouriot J, Berle M, Reinald N, Krypciak S, et al. Comprehensive  
28 645 geriatric assessment in the decision-making process in elderly patients with cancer: ELCAPA  
29 646 study. *J Clin Oncol*. 2011;29:3636–42.
- 31 647 21. Website: [http://www.cepd.fr/CUSTOM/CEPD\\_toxicite.pdf](http://www.cepd.fr/CUSTOM/CEPD_toxicite.pdf).
- 33 648 22. Linn BS, Linn MW, Gurel L. CUMULATIVE ILLNESS RATING SCALE. *J Am Geriatr Soc*. 1968  
34 649 May;16(5):622–6.
- 36 650 23. Katz S, Ford AB, Moskowitz RW, Jackson BA, Jaffe MW. Studies of Illness in the Aged. The Index  
37 651 of Adl: A Standardized Measure of Biological and Psychosocial Function. *Jama*. 1963 Sep  
38 652 21;185:914–9.
- 41 653 24. Falandry C, Stefani L, Granger M, Momiron C, Habchi H, Bourgeois C, et al. Interventions to  
42 654 improve physical performances of older people with cancer before major surgery: an umbrella  
43 655 review. *J Geriatr Oncol*. 2018;9(6 suppl 1):S94–5.
- 45 656 25. Falandry C, Stefani L, André L, Granger M, Barbarava C, Habchi H, et al. Interventions to  
46 657 improve physical performances of older people with cancer before complex medico-surgical  
47 658 procedures: protocol for an umbrella review of systematic reviews and meta-analyses.  
48 659 *Medicine (Baltimore)*. 2020;in press.
- 51 660 26. Glasgow RE, Emmons KM. How Can We Increase Translation of Research into Practice? Types of  
52 661 Evidence Needed. *Annu Rev Public Health*. 2007;28(1):413–33.
- 54 662 27. Colburn JL, Mohanty S, Burton JR. Surgical Guidelines for Perioperative Management of Older  
55 663 Adults: What Geriatricians Need to Know. *J Am Geriatr Soc*. 2017 Jun 1;65(6):1339–46.
- 57 664 28. Arends J, Bodoky G, Bozzetti F, Fearon K, Muscaritoli M, Selga G, et al. ESPEN Guidelines on  
58 665 Enteral Nutrition: Non-surgical oncology. *Clin Nutr*. 2006 Apr;25(2):245–59.
- 60



- 1  
2  
3 666 29. Weimann A, Braga M, Harsanyi L, Laviano A, Ljungqvist O, Soeters P, et al. ESPEN Guidelines on  
4 667 Enteral Nutrition: Surgery including Organ Transplantation. *Clin Nutr.* 2006 Apr;25(2):224–44.  
5  
6 668 30. Mohanty S, Rosenthal RA, Russell MM, Neuman MD, Ko CY, Esnaola NF. Optimal Perioperative  
7 669 Management of the Geriatric Patient: A Best Practices Guideline from the American College of  
8 670 Surgeons NSQIP and the American Geriatrics Society. *J Am Coll Surg.* 2016 May 1;222(5):930–  
9 671 47.  
10  
11 672 31. Oken MM, Creech RH, Tormey DC, Horton J, Davis TE, McFadden ET, et al. Toxicity and  
12 673 response criteria of the Eastern Cooperative Oncology Group. *Am J Clin Oncol.* 1982  
13 674 Dec;5(6):649–55.  
14  
15 675 32. Lawton MP, Brody EM. Assessment of older people: self-maintaining and instrumental activities  
16 676 of daily living. *Gerontologist.* 1969 Autumn;9:179–86.  
17  
18 677 33. Bellera CA, Rainfray M, Mathoulin-Pélissier S, Mertens C, Delva F, Fonck M, et al. Screening  
19 678 older cancer patients: first evaluation of the G-8 geriatric screening tool. *Ann Oncol.* 2012  
20 679 Aug;23(8):2166–72.  
21  
22 680 34. Topolski TD, LoGerfo J, Patrick DL, Williams B, Walwick J, Patrick MB. The Rapid Assessment of  
23 681 Physical Activity (RAPA) among older adults. *Prev Chronic Dis.* 2006 Oct;3(4):A118.  
24  
25 682 35. Gill TM, Baker DI, Gottschalk M, Peduzzi PN, Allore H, Van Ness PH. A prehabilitation program  
26 683 for the prevention of functional decline: effect on higher-level physical function. *Arch Phys Med  
27 684 Rehabil.* 2004 Jul;85(7):1043–9.  
28  
29 685 36. Quinten C, Coens C, Ghislain I, Zikos E, Sprangers MAG, Ringash J, et al. The effects of age on  
30 686 health-related quality of life in cancer populations: A pooled analysis of randomized controlled  
31 687 trials using the European Organisation for Research and Treatment of Cancer (EORTC) QLQ-C30  
32 688 involving 6024 cancer patients. *Eur J Cancer.* 2015 Dec;51(18):2808–19.  
33  
34 689 37. Wheelwright S, Darlington A-S, Fitzsimmons D, Fayers P, Arraras JI, Bonnetain F, et al.  
35 690 International validation of the EORTC QLQ-ELD14 questionnaire for assessment of health-  
36 691 related quality of life elderly patients with cancer. *Br J Cancer.* 2013 Aug;109(4):852–8.  
37  
38 692 38. Janssen MF, Pickard AS, Golicki D, Gudex C, Niewada M, Scalone L, et al. Measurement  
39 693 properties of the EQ-5D-5L compared to the EQ-5D-3L across eight patient groups: a multi-  
40 694 country study. *Qual Life Res.* 2013 Sep;22(7):1717–27.  
41  
42 695 39. Ware JE, Sherbourne CD. The MOS 36-item short-form health survey (SF-36). I. Conceptual  
43 696 framework and item selection. *Med Care.* 1992 Jun;30(6):473–83.  
44  
45 697 40. Fish J. Short Physical Performance Battery. In: Kreutzer JS, DeLuca J, Caplan B, editors.  
46 698 *Encyclopedia of Clinical Neuropsychology* [Internet]. New York, NY: Springer New York; 2011  
47 699 [cited 2020 Nov 4]. p. 2289–91. Available from: [http://link.springer.com/10.1007/978-0-387-79948-3\\_1832](http://link.springer.com/10.1007/978-0-387-79948-3_1832)  
48 700  
49  
50 701 41. Goo A-J, Song Y-M, Shin J, Ko H. Factors Associated with Depression Assessed by the Patient  
51 702 Health Questionnaire-2 in Long-Term Cancer Survivors. *Korean J Fam Med.* 2016;37(4):228.  
52  
53 703 42. Guigoz Y, Vellas B, Garry PJ. Assessing the Nutritional Status of the Elderly: The Mini Nutritional  
54 704 Assessment as Part of the Geriatric Evaluation. *Nutr Rev.* 2009 Apr 27;54(1):S59–65.  
55  
56  
57  
58  
59  
60

- 1  
2  
3 705 43. Yesavage JA, Brink TL, Rose TL, Lum O, Huang V, Adey M, et al. Development and validation of a  
4 706 geriatric depression screening scale: A preliminary report. *J Psychiatr Res.* 1982 Jan;17(1):37–  
5 707 49.
- 7 708 44. McCarten JR, Anderson P, Kuskowski MA, McPherson SE, Borson S. Screening for Cognitive  
8 709 Impairment in an Elderly Veteran Population: Acceptability and Results Using Different Versions  
9 710 of the Mini-Cog: SCREENING ELDERLY VETERANS USING THE MINI-COG. *J Am Geriatr Soc.* 2011  
11 711 Feb;59(2):309–13.
- 13 712 45. Tinetti ME, Baker DI, McAvay G, Claus EB, Garrett P, Gottschalk M, et al. A Multifactorial  
14 713 Intervention to Reduce the Risk of Falling among Elderly People Living in the Community. *N Engl*  
15 714 *J Med.* 1994 Sep 29;331(13):821–7.
- 17 715 46. Borg G. Perceived exertion as an indicator of somatic stress. *Scand J Rehabil Med.*  
18 716 1970;2(2):92–8.
- 21 717 47. Agence Nationale d'Accréditation et d'Evaluation en Santé (ANAES). Assessment and follow-up  
22 718 of chronic pain in adults in ambulatory medicine. 1999 Feb;
- 24 719 48. Société Francophone Nutrition Clinique et Métabolisme (SFNCM). Evaluation of food intake.
- 26 720 49. de Souto Barreto P, Ferrandez A-M. Activités instrumentales physiques de la vie quotidienne  
27 721 chez les personnes âgées: validation d'une échelle. In: *L'anthropologie du vivant: objets et*  
28 722 *méthodes.* Chapuis-Lucciani N, Guihard-Costa AM, Boëtsch G. 2010. p. 83–7.
- 30 723 50. Aaronson NK, Ahmedzai S, Bergman B, Bullinger M, Cull A, Duez NJ, et al. The European  
31 724 Organization for Research and Treatment of Cancer QLQ-C30: A Quality-of-Life Instrument for  
32 725 Use in International Clinical Trials in Oncology. *JNCI J Natl Cancer Inst.* 1993 Mar 3;85(5):365–  
34 726 76.
- 36 727 51. Wheelwright S, Darlington A-S, Fitzsimmons D, Fayers P, Arraras JI, Bonnetain F, et al.  
37 728 International validation of the EORTC QLQ-ELD14 questionnaire for assessment of health-  
38 729 related quality of life elderly patients with cancer. *Br J Cancer.* 2013 Aug 20;109(4):852–8.
- 40 730 52. Boereboom C, Doleman B, Lund JN, Williams JP. Systematic review of pre-operative exercise in  
41 731 colorectal cancer patients. *Tech Coloproctology.* 2016 Feb 1;20(2):81–9.
- 43 732 53. Sun V, Raz DJ, Kim JY, Melstrom L, Hite S, Varatkar G, et al. Barriers and facilitators of  
44 733 adherence to a perioperative physical activity intervention for older adults with cancer and  
45 734 their family caregivers. *J Geriatr Oncol.* 2020 Mar 1;11(2):256–62.
- 47 735 54. Gijzel SMW, Whitson HE, Leemput IA, Scheffer M, Asselt D, Rector JL, et al. Resilience in Clinical  
48 736 Care: Getting a Grip on the Recovery Potential of Older Adults. *J Am Geriatr Soc.* 2019  
49 737 Dec;67(12):2650–7.
- 51 738 55. Cnaan A, Laird NM, Slasor P. Using the general linear mixed model to analyse unbalanced  
52 739 repeated measures and longitudinal data. *Stat Med.* 1997 Oct 30;16(20):2349–80.
- 55 740 56. Bonnetain F, Fiteni F, Efficace F, Anota A. Statistical Challenges in the Analysis of Health-Related  
56 741 Quality of Life in Cancer Clinical Trials. *J Clin Oncol.* 2016 Jan 6;34(16):1953–6.
- 58 742 57. Prehabilitation, rehabilitation, and revocation in the Army. *Br Med J.* 1946 Jun 29;1:192–7.
- 59  
60

1  
2  
3 743 58. Topp R, Ditmyer M, King K, Doherty K, Hornyak J. The effect of bed rest and potential of  
4 744 prehabilitation on patients in the intensive care unit. AACN Clin Issues. 2002 May;13(2):263–76.  
5  
6 745  
7  
8 746  
9  
10  
11  
12  
13  
14  
15  
16  
17  
18  
19  
20  
21  
22  
23  
24  
25  
26  
27  
28  
29  
30  
31  
32  
33  
34  
35  
36  
37  
38  
39  
40  
41  
42  
43  
44  
45  
46  
47  
48  
49  
50  
51  
52  
53  
54  
55  
56  
57  
58  
59  
60

For peer review only

1  
2  
3  
4  
5  
6  
7  
8  
9  
10  
11  
12  
13  
14  
15  
16  
17  
18  
19  
20  
21  
22  
23  
24  
25  
26  
27  
28  
29  
30  
31  
32  
33  
34  
35  
36  
37  
38  
39  
40  
41  
42  
43  
44  
45  
46  
47  
48  
49  
50  
51  
52  
53  
54  
55  
56  
57  
58  
59  
60

747 **Illustrations' legends**

748 Figure 1: PROADAPT program: interventions at the patient's level

749 Table 1: PROADAPT program: tasks according the different domains and the successive chronological  
750 steps (before, during and after complex medico-surgical procedure)

751 Table 2: PROADAPT pilot trial: questionnaires and screening tests

752 Table 3: PROADAPT pilot trial: flow diagram

753

754

For peer review only

755 Table 1: PROADAPT program: tasks according the different domains and the successive chronological  
756 steps (before, during and after complex medico-surgical procedure)

|                                                      |                                                                                                                                                                                                                                                                                                                                                                                                                                                                                                                                                                                               |                                                                                                                                                                                                                                                                                                                                                                                                                                                                                                                                                                                                                                                                                                                                                                                                                                                                                                                                                                                                                     |                                                                                                                                                                                                                                                                                                                                                                                                               |                                                                                                                                    |
|------------------------------------------------------|-----------------------------------------------------------------------------------------------------------------------------------------------------------------------------------------------------------------------------------------------------------------------------------------------------------------------------------------------------------------------------------------------------------------------------------------------------------------------------------------------------------------------------------------------------------------------------------------------|---------------------------------------------------------------------------------------------------------------------------------------------------------------------------------------------------------------------------------------------------------------------------------------------------------------------------------------------------------------------------------------------------------------------------------------------------------------------------------------------------------------------------------------------------------------------------------------------------------------------------------------------------------------------------------------------------------------------------------------------------------------------------------------------------------------------------------------------------------------------------------------------------------------------------------------------------------------------------------------------------------------------|---------------------------------------------------------------------------------------------------------------------------------------------------------------------------------------------------------------------------------------------------------------------------------------------------------------------------------------------------------------------------------------------------------------|------------------------------------------------------------------------------------------------------------------------------------|
| Nurse coaching & education<br>Bridging interventions | Coaching nurse self-presentation<br>Delivery of a personalized patient booklet Care according best practice<br>guidelines:<br>- Confirm and document patient goals and treatment preferences, including advance directives.<br>- Confirm and document patient's health care proxy or surrogate decision-maker.<br>- In patients with existing advance directives, discuss new risks associated with the surgical procedure and an approach for potentially life-threatening problems consistent with the patient's values and preferences ("required reconsideration").<br>Weekly phone calls | Coaching nurse visits / phone calls<br>Communication of patient's preference to the staff                                                                                                                                                                                                                                                                                                                                                                                                                                                                                                                                                                                                                                                                                                                                                                                                                                                                                                                           | Coaching nurse visit in the rehabilitation ward<br>Communication of patient's preference and care difficulties to the staff (checklist):<br>- delirium/cognitive impairment<br>- peri-operative acute pain<br>- pulmonary complications<br>- fall risk<br>- ability to maintain adequate nutrition<br>- urinary tract infection prevention<br>- functional decline monitoring<br>- pressure ulcers prevention | Coaching nurse bi-weekly phone call<br>Communication of patient's care difficulties to the staff                                   |
| Nutrition                                            | W-4 : nutritional evaluation<br>Nutritional plan based on measured intake<br>W-3 : nutritional follow up - weight<br>W-2 : nutritional follow up-weight<br>W-1 : nutritional follow up-weight + pre-operative immunonutrition                                                                                                                                                                                                                                                                                                                                                                 | If surgery: Care according best practice guidelines:<br>- Consider shortened fluid fast (clear liquids up to 2 hours before anaesthesia).(29)<br>- Normal food intake or enteral feeding should start as early as possible                                                                                                                                                                                                                                                                                                                                                                                                                                                                                                                                                                                                                                                                                                                                                                                          | Nutritional plan based on<br>- Weight curve<br>- Measured intake<br>Optimal management of<br>- Nausea/vomiting<br>- Abdominal pain                                                                                                                                                                                                                                                                            | Nutritional plan based on<br>- Weight curve<br>- Measured intake<br>Optimal management of<br>- Nausea/vomiting<br>- Abdominal pain |
| Physical activity                                    | W-4 : physical performances evaluation<br>Physical activity plan<br>W-3 : group physical activity<br>W-2 : +<br>W-1 : functional follow-up                                                                                                                                                                                                                                                                                                                                                                                                                                                    | If surgery: care according best practice guidelines:<br>- Early physical and/or occupational therapy.<br>- Check for orthostatic hypotension.<br>- Review physical environment to reduce injury risk.<br>- Assistive walking devices (eg walkers) at bedside if used as outpatient                                                                                                                                                                                                                                                                                                                                                                                                                                                                                                                                                                                                                                                                                                                                  | (to the discretion of the rehabilitation unit)                                                                                                                                                                                                                                                                                                                                                                | Pursuing of the pre-operative physical activity plan                                                                               |
| Medication conciliation                              | Centralized medication conciliation and treatment optimization (STOPP/START guidelines)                                                                                                                                                                                                                                                                                                                                                                                                                                                                                                       | Centralized medication conciliation<br>Advices for care according best practice guidelines (16):<br>- Adhere to existing best practices regarding antibiotic and venous thromboembolism prophylaxis.<br>- Ensure nonessential medications have been stopped and essential medications have been taken.                                                                                                                                                                                                                                                                                                                                                                                                                                                                                                                                                                                                                                                                                                              | Centralized medication conciliation                                                                                                                                                                                                                                                                                                                                                                           | Centralized medication conciliation                                                                                                |
| Standardization of surgical procedures               |                                                                                                                                                                                                                                                                                                                                                                                                                                                                                                                                                                                               | If surgery: consider antiseptic toothpaste<br>If surgery: care according best practice Guidelines (16):<br>- Consideration of regional techniques to avoid postoperative complications and improve pain control.<br>- Directed pain history.<br>- Multi-modal or opioid-sparing techniques.<br>- Postoperative nausea risk stratification and prevention strategies.<br>- Strategies to avoid pressure ulcers and nerve damage.<br>- Prevention of postoperative pulmonary complications and hypothermia.<br>- Judicious use of intravenous fluids.<br>- Appropriate hemodynamic management.<br>- Continuation of indicated cardiac medications.<br>- Daily post-operative rounding checklist:<br>- delirium/cognitive impairment<br>- peri-operative acute pain<br>- pulmonary complications<br>- fall risk<br>- ability to maintain adequate nutrition<br>- urinary tract infection prevention<br>- functional decline monitoring<br>- Pressure ulcers prevention<br>If surgery: consider IV iron supplementation |                                                                                                                                                                                                                                                                                                                                                                                                               |                                                                                                                                    |

757

758

759 Table 2: PROADAPT pilot trial: questionnaires and screening tests

| Domain                 |                                                      |
|------------------------|------------------------------------------------------|
| Autonomy               | Activity of Daily Living Scale (ADL)                 |
|                        | Instrumental Activities of Daily Living scale (IADL) |
| Geriatric screening    | G8                                                   |
| Physical activity      | RAPA (Rapid Assessment of Physical Activity), AIPVQ  |
| Quality of life        | QLQ-C30 cancer specific QoL questionnaire, QLQ-      |
|                        | ED14 older cancer patients questionnaire, EQ-5D-3L   |
|                        | utility questionnaire, SF-36 general QoL             |
|                        | questionnaire                                        |
| Locomotion and balance | Timed Up and Go test, SPPB (Short Physical           |
|                        | Performance Battery)                                 |
| Pain                   | Pain scale evaluation                                |
| Nutrition              | Nutrition scale evaluation                           |
| Tiredness severity     | FSS                                                  |
| Depression/anxiety     | MNA, GDS4/GDS15                                      |
| Cognitive assessment   | MINI-COG                                             |
| Fall risk assessment   | Tinetti test                                         |
| Breathlessness         | Borg scale                                           |

760

761

762 Table 3: PROADAPT pilot trial: flow diagram

|                                             | Baseline | Pre-therapeutic visit<br>(0-5 days before<br>intervention) | M1, M3, M6 | M12 | End of<br>study visit |
|---------------------------------------------|----------|------------------------------------------------------------|------------|-----|-----------------------|
| <i>Complex geriatric assessment</i>         |          |                                                            |            |     |                       |
| G8                                          | X        |                                                            |            | X   | X                     |
| ADL/IADL                                    | X        |                                                            |            | X   | X                     |
| GDS4/GDS15                                  | X        |                                                            |            | X   | X                     |
| MINI COG                                    | X        |                                                            |            | X   | X                     |
| MNA                                         | X        |                                                            |            | X   | X                     |
| QLQ-C30                                     | X        |                                                            | X          | X   | X                     |
| QLQ-ELD14                                   | X        |                                                            | X          | X   | X                     |
| EQ-5D-3L                                    | X        |                                                            | X          | X   | X                     |
| Pain scale evaluation                       | X        | X                                                          | X          | X   | X                     |
| Nutrition scale evaluation                  | X        | X                                                          | X          | X   | X                     |
| Socio-economic evaluation                   | X        |                                                            |            |     |                       |
| <i>Physical and respiratory assessments</i> |          |                                                            |            |     |                       |
| FSS                                         | X        |                                                            | X          | X   | X                     |
| SF-36                                       | X        |                                                            | X          | X   | X                     |
| Timed Up and Go test                        | X        |                                                            |            | X   | X                     |
| SPPB                                        | X        |                                                            | X          | X   | X                     |
| Borg scale                                  | X        |                                                            |            | X   | X                     |
| RAPA questionnaire                          | X        |                                                            | X          | X   | X                     |
| AIPVQ scale                                 | X        |                                                            | X          | X   | X                     |
| Tinetti test                                | X        |                                                            |            | X   | X                     |
| Equimog evaluation                          | X        |                                                            |            | X   | X                     |
| Triflo                                      | X        | X                                                          |            |     |                       |
| Voldyne                                     | X        | X                                                          |            |     |                       |
| Physical activity data collection           |          | X                                                          | X          | X   | X                     |
| <i>Patients' satisfaction</i>               |          |                                                            |            |     |                       |
| Standardized questionnaire                  |          |                                                            |            |     | X                     |

763

1  
2  
3  
4  
5  
6  
7  
8  
9  
10  
11  
12  
13  
14  
15  
16  
17  
18  
19  
20  
21  
22  
23  
24  
25  
26  
27  
28  
29  
30  
31  
32  
33  
34  
35  
36  
37  
38  
39  
40  
41  
42  
43  
44  
45  
46  
47  
48  
49  
50  
51  
52  
53  
54  
55  
56  
57  
58  
59  
60

Figure 1 : PROADAPT program : interventions at the patient’s level

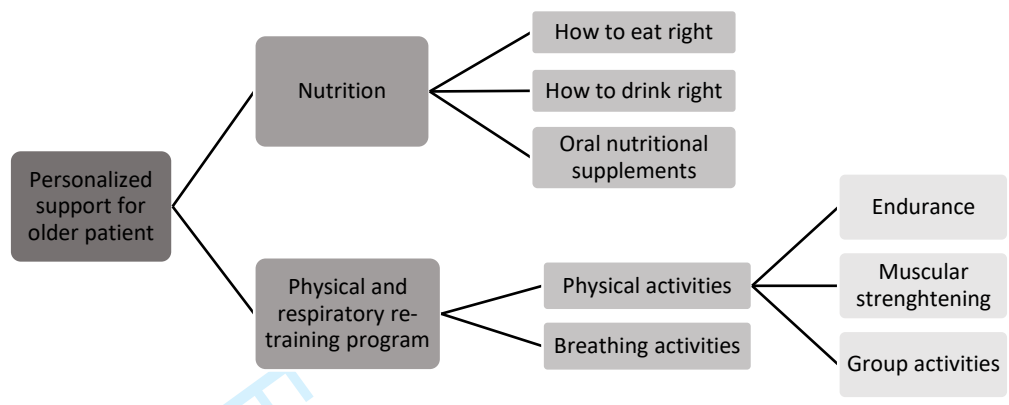



Supplementary table 1 : Satisfaction questionnaire

|                                                                                                                                                                          |                                                                                    |
|--------------------------------------------------------------------------------------------------------------------------------------------------------------------------|------------------------------------------------------------------------------------|
| <br>Hospices Civils de Lyon<br>Direction de la Recherche Clinique<br>et de l'Innovation | <h2 style="margin: 0;">PATIENT ASSESSMENT OF THE PROADAPT PILOT PHASE PROGRAM</h2> |
|--------------------------------------------------------------------------------------------------------------------------------------------------------------------------|------------------------------------------------------------------------------------|

Mrs, Mr,

You have been part of the PROADAPT - pilot phase study and we thank you for your involvement. In order to assess and improve this study, we would like to collect your opinion. This opinion is anonymous and does not affect your healthcare.

**The following questions concern the patient booklet that was given to you as part of the study**

If you consider the booklet globally

- The explanations seem appropriate to you ?      Not at all       A little       Absolutely
- The information seem clear to you ?      Not at all       A little       Absolutely
- The pages seem readable enough ?      Not at all       A little       Absolutely
- The illustrations seem clear to you ?      Not at all       A little       Absolutely

How would you rate the booklet ?      0   1   2   3   4   5   6   7   8   9   10  
 (useless = 0 ; very useful = 10)

**The following questions concern the PROADAPT pilot phase program globally (breathing and physical exercises, booklet, calls and follow-up visits)**

Did you have difficulty to understand the explanations given by the medical staff and the physician

- for breathing exercises ?      Not at all       A little       A lot
- for physical exercises ?      Not at all       A little       A lot
- for nutritional advices ?      Not at all       A little       A lot
- during the assessment with the physician on the different drugs you are taking ?      Not at all       A little       A lot

Did you encounter any difficulties

- for the realization of breathing exercises ?      Not at all       A little       A lot
- for the realization of physical exercises ?      Not at all       A little       A lot

1  
2  
3  
4  
5  
6  
7  
8  
9  
10  
11  
12  
13  
14  
15  
16  
17  
18  
19  
20  
21  
22  
23  
24  
25  
26  
27  
28  
29  
30  
31  
32  
33  
34  
35  
36  
37  
38  
39  
40  
41  
42  
43  
44  
45  
46  
47  
48  
49  
50  
51  
52  
53  
54  
55  
56  
57  
58  
59  
60

- for the setting up of nutritional advice ? Not at all  A little  A lot
- for the filling of activities ? Not at all  A little  A lot

How do you estimate nursing phone calls

- at the beginning of your healthcare before your surgery / radiotherapy Useless  Little important  Needed
- after your surgery/radiotherapy Useless  Little important  Needed

Would you like to get more information ? No  Yes

If yes, which ones,.....  
.....

What would be your propositions to make the program more suitable for patients?  
.....  
.....  
.....

Thank you for your time, we will use your advice to improve the PROADAPT program and the patient booklet.

Pr Claire Falandry, study coordinator

Supplementary table 2: All items from the World Health Organization Trial Registration Data Set (SPIRIT item 2b)

| Data category                                 | Information                                                                                                                                                                                                                                                                                                                                                                                                                                                                                                                                                                                                                                                                                                                                                                                                                                                                                     |
|-----------------------------------------------|-------------------------------------------------------------------------------------------------------------------------------------------------------------------------------------------------------------------------------------------------------------------------------------------------------------------------------------------------------------------------------------------------------------------------------------------------------------------------------------------------------------------------------------------------------------------------------------------------------------------------------------------------------------------------------------------------------------------------------------------------------------------------------------------------------------------------------------------------------------------------------------------------|
| Primary registry and trial identifying number | ClinicalTrials.gov<br>NCT03659123                                                                                                                                                                                                                                                                                                                                                                                                                                                                                                                                                                                                                                                                                                                                                                                                                                                               |
| Date of registration in primary registry      | September 6, 2018                                                                                                                                                                                                                                                                                                                                                                                                                                                                                                                                                                                                                                                                                                                                                                                                                                                                               |
| Secondary identifying numbers                 | 69HCL16_0701<br>ID RCB N° 2018-A001026-49                                                                                                                                                                                                                                                                                                                                                                                                                                                                                                                                                                                                                                                                                                                                                                                                                                                       |
| Source(s) of monetary or material support     | Agence Régionale de Santé Auvergne Rhône Alpes                                                                                                                                                                                                                                                                                                                                                                                                                                                                                                                                                                                                                                                                                                                                                                                                                                                  |
| Primary sponsor                               | Hospices Civils de Lyon                                                                                                                                                                                                                                                                                                                                                                                                                                                                                                                                                                                                                                                                                                                                                                                                                                                                         |
| Secondary sponsor(s)                          |                                                                                                                                                                                                                                                                                                                                                                                                                                                                                                                                                                                                                                                                                                                                                                                                                                                                                                 |
| Contact for public queries                    | David Dayde, +33.4.78.86.37.74, david.dayde@chu-lyon.fr                                                                                                                                                                                                                                                                                                                                                                                                                                                                                                                                                                                                                                                                                                                                                                                                                                         |
| Contact for scientific queries                | Claire Falandry, +33.4.78.86.66.34, claire.falandry@chu-lyon.fr                                                                                                                                                                                                                                                                                                                                                                                                                                                                                                                                                                                                                                                                                                                                                                                                                                 |
| Public title                                  | Prehabilitation & Rehabilitation in Oncogeriatrics: Adaptation to Deconditioning Risk and Accompaniment of Patients' With Cancer                                                                                                                                                                                                                                                                                                                                                                                                                                                                                                                                                                                                                                                                                                                                                                |
| Scientific title                              | Prehabilitation & Rehabilitation in Oncogeriatrics: Adaptation to Deconditioning Risk and Accompaniment of Patients' With Cancer, a Multicenter Pilot Study                                                                                                                                                                                                                                                                                                                                                                                                                                                                                                                                                                                                                                                                                                                                     |
| Countries of recruitment                      | France                                                                                                                                                                                                                                                                                                                                                                                                                                                                                                                                                                                                                                                                                                                                                                                                                                                                                          |
| Health condition(s) or problem(s) studied     | Old Injury                                                                                                                                                                                                                                                                                                                                                                                                                                                                                                                                                                                                                                                                                                                                                                                                                                                                                      |
| Intervention(s)                               | Behavioral: standardized geriatric intervention<br>Nutritional care is based on: <ul style="list-style-type: none"> <li>• A personalized evaluation of nutritional balance and nutritional needs of the patient</li> <li>• A weekly follow-up of weight and nutritional intake</li> </ul> Total-body rehabilitation is based on: <ul style="list-style-type: none"> <li>• 2 to 3 times a week: strength exercise</li> <li>• 2 to 3 times a week: endurance exercise, 20 to 45 min each sequence</li> <li>• 2 times a week: respiratory physiotherapy<br/>Pharmaceutical conciliation and optimization according STOPP/START criteria<br/>During peri-operative time, the nurse contacts the surgical team for transmission of patient's personal data, physical medication conciliation results<br/>During rehabilitation time and hospital-home transition time, the nurse contacts</li> </ul> |

| Data category                        | Information                                                                                                                                                                                                                                                                                                                                                                                                                                                                                                                                                                                                                                                                                                                                                                                                                                                                                                                                                             |
|--------------------------------------|-------------------------------------------------------------------------------------------------------------------------------------------------------------------------------------------------------------------------------------------------------------------------------------------------------------------------------------------------------------------------------------------------------------------------------------------------------------------------------------------------------------------------------------------------------------------------------------------------------------------------------------------------------------------------------------------------------------------------------------------------------------------------------------------------------------------------------------------------------------------------------------------------------------------------------------------------------------------------|
|                                      | the rehabilitation team for transmission of patient's personal data and care course, physical (nutritional, functional and/or comorbidities), medication conciliation results.                                                                                                                                                                                                                                                                                                                                                                                                                                                                                                                                                                                                                                                                                                                                                                                          |
| Key inclusion and exclusion criteria | <p>Inclusion Criteria:</p> <p>Patient <math>\geq 70</math> year old OR patient <math>\geq 60</math> years with significant comorbid condition (modified Charlson index <math>\geq 3</math>) or disability (ADL score <math>&lt; 6/6</math>);</p> <p>Histologically or cytologically proven cancer.</p> <p>Life expectancy <math>&gt; 3</math> months.</p> <p>Written informed consent obtained</p> <p>Covered by a Health System where applicable.</p> <p>Exclusion Criteria:</p> <p>Other malignancy within the last 5 years, except for adequately treated carcinoma in situ of the cervix or squamous carcinoma of the skin, or adequately controlled limited basal cell skin cancer.</p> <p>Patient unable to be regularly followed for any reason (geographic, familial, social, psychological).</p> <p>Any mental or physical handicap at risk of interfering with the appropriate treatment.</p> <p>Any administrative or legal supervision where applicable</p> |
| Study type                           | <p>Interventional</p> <p>Allocation: N/A</p> <p>Intervention model: Single Group Assignment</p> <p>Masking: None (Open Label)</p> <p>Primary purpose: Health Services Research</p> <p>Phase II</p>                                                                                                                                                                                                                                                                                                                                                                                                                                                                                                                                                                                                                                                                                                                                                                      |
| Date of first enrolment              | July 3rd, 2018                                                                                                                                                                                                                                                                                                                                                                                                                                                                                                                                                                                                                                                                                                                                                                                                                                                                                                                                                          |
| Target sample size                   | 122                                                                                                                                                                                                                                                                                                                                                                                                                                                                                                                                                                                                                                                                                                                                                                                                                                                                                                                                                                     |
| Recruitment status                   | Recruiting                                                                                                                                                                                                                                                                                                                                                                                                                                                                                                                                                                                                                                                                                                                                                                                                                                                                                                                                                              |
| Primary outcome(s)                   | <p>Implementation of at least one item of PROADAPT standardized geriatric intervention of the program PROADAPT pilot study [ Time Frame: 12 months ]:</p> <ul style="list-style-type: none"> <li>• Preoperative physical activity including strength and endurance exercise assessed by physical exercises accomplished under the supervision of a physiotherapist. Number of patients with at least 1 intervention achieved in the domain.</li> <li>• Nutrition guidelines before and after physical activity assessed by questionnaires. Number of patients with at least 1 intervention achieved in the domain.</li> </ul>                                                                                                                                                                                                                                                                                                                                           |

| Data category          | Information                                                                                                                                                                                                                                                                                                                                                                                                                                                                                                                                                                                                                                                                                                                                                                                                                                              |
|------------------------|----------------------------------------------------------------------------------------------------------------------------------------------------------------------------------------------------------------------------------------------------------------------------------------------------------------------------------------------------------------------------------------------------------------------------------------------------------------------------------------------------------------------------------------------------------------------------------------------------------------------------------------------------------------------------------------------------------------------------------------------------------------------------------------------------------------------------------------------------------|
|                        | <ul style="list-style-type: none"> <li>• Patient education and coaching assessed by questionnaires and visits. Number of patients with at least 1 intervention achieved in the domain</li> <li>• Achievement of standardized intervention procedures, according to the checklist established in consensus with surgeons. Number of patients with at least 1 intervention achieved in the domain</li> <li>• Rehabilitation assessed by questionnaires. Number of patients with at least 1 intervention achieved in the domain</li> <li>• Accomplishment of pharmaceutical medication conciliation and treatment optimization. Number of patients with at least 1 intervention achieved in the domain</li> <li>• Bridging interventions for hospital-to-home transition. Number of patients with at least 1 intervention achieved in the domain</li> </ul> |
| Key secondary outcomes | <ul style="list-style-type: none"> <li>• Post operative morbidity [ Time Frame: 30 and 90 days ] according Clavien-Dindo classification</li> <li>• Post-operative morbidity [ Time Frame: 90 days ] according to NCI CTC v4.4</li> <li>• Therapeutic strategy [ Time Frame: 12 months ]: Treatment plan completion rate: Number of patients for whom the treatment plan was completed.</li> <li>• Progression-free Survival [ Time Frame: 12 months ]</li> <li>• Post-treatment complication [ Time Frame: 12 months ]: Post-treatment complication grade<math>\geq</math>3 according the National Cancer Institute Common Toxicity Criteria version 4 (NCI-CTC-v4)</li> </ul>                                                                                                                                                                           |

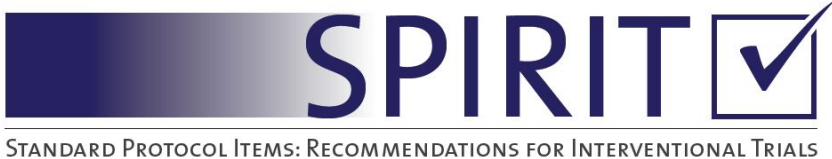

Supplementary table 1: SPIRIT 2013 checklist of the trial

SPIRIT 2013 Checklist: Recommended items to address in a clinical trial protocol and related documents\*

| Section/item                      | ItemNo | Description                                                                                                  | Reported on page #                               |
|-----------------------------------|--------|--------------------------------------------------------------------------------------------------------------|--------------------------------------------------|
| <b>Administrative information</b> |        |                                                                                                              |                                                  |
| Title                             | 1      | Descriptive title identifying the study design, population, interventions, and, if applicable, trial acronym | 1                                                |
| Trial registration                | 2a     | Trial identifier and registry name. If not yet registered, name of intended registry                         | 2                                                |
|                                   | 2b     | All items from the World Health Organization Trial Registration Data Set                                     | Supplementary table 2<br>Ref 24                  |
| Protocol version                  | 3      | Date and version identifier                                                                                  | 17 (Ethics and Consent to participate)           |
| Funding                           | 4      | Sources and types of financial, material, and other support                                                  | 17-18 (Funding)                                  |
| Roles and responsibilities        | 5a     | Names, affiliations, and roles of protocol contributors                                                      | 1 (Authors' list)<br>18 (Authors' contributions) |
|                                   | 5b     | Name and contact information for the trial sponsor                                                           | Supplementary table 2<br>Ref 24                  |

|    |                                                           |    |                                                                                                                                                                                                                                                                                          |
|----|-----------------------------------------------------------|----|------------------------------------------------------------------------------------------------------------------------------------------------------------------------------------------------------------------------------------------------------------------------------------------|
| 1  |                                                           |    |                                                                                                                                                                                                                                                                                          |
| 2  |                                                           |    |                                                                                                                                                                                                                                                                                          |
| 3  |                                                           |    |                                                                                                                                                                                                                                                                                          |
| 4  |                                                           | 5c | Role of study sponsor and funders, if any, in study design; collection, management, analysis, and interpretation of data; writing of the report; and the decision to submit the report for publication, including whether they will have ultimate authority over any of these activities |
| 5  |                                                           |    | 10 (Ethical and legal considerations)                                                                                                                                                                                                                                                    |
| 6  |                                                           |    | 17 (Funding)                                                                                                                                                                                                                                                                             |
| 7  |                                                           |    |                                                                                                                                                                                                                                                                                          |
| 8  |                                                           |    |                                                                                                                                                                                                                                                                                          |
| 9  |                                                           | 5d | Composition, roles, and responsibilities of the coordinating centre, steering committee, endpoint adjudication committee, data management team, and other individuals or groups overseeing the trial, if applicable (see Item 21a for data monitoring committee)                         |
| 10 |                                                           |    | 13 (Data management and statistical analyses)                                                                                                                                                                                                                                            |
| 11 |                                                           |    | 14 (Data monitoring)                                                                                                                                                                                                                                                                     |
| 12 |                                                           |    |                                                                                                                                                                                                                                                                                          |
| 13 |                                                           |    |                                                                                                                                                                                                                                                                                          |
| 14 |                                                           |    |                                                                                                                                                                                                                                                                                          |
| 15 | <b>Introduction</b>                                       |    |                                                                                                                                                                                                                                                                                          |
| 16 |                                                           |    |                                                                                                                                                                                                                                                                                          |
| 17 | Background and rationale                                  | 6a | Description of research question and justification for undertaking the trial, including summary of relevant studies (published and unpublished) examining benefits and harms for each intervention                                                                                       |
| 18 |                                                           |    | 3                                                                                                                                                                                                                                                                                        |
| 19 |                                                           |    |                                                                                                                                                                                                                                                                                          |
| 20 |                                                           |    |                                                                                                                                                                                                                                                                                          |
| 21 |                                                           |    |                                                                                                                                                                                                                                                                                          |
| 22 |                                                           | 6b | Explanation for choice of comparators                                                                                                                                                                                                                                                    |
| 23 |                                                           |    | N/A                                                                                                                                                                                                                                                                                      |
| 24 | Objectives                                                | 7  | Specific objectives or hypotheses                                                                                                                                                                                                                                                        |
| 25 |                                                           |    | 4                                                                                                                                                                                                                                                                                        |
| 26 | Trial design                                              | 8  | Description of trial design including type of trial (eg, parallel group, crossover, factorial, single group), allocation ratio, and framework (eg, superiority, equivalence, noninferiority, exploratory)                                                                                |
| 27 |                                                           |    | 5                                                                                                                                                                                                                                                                                        |
| 28 |                                                           |    |                                                                                                                                                                                                                                                                                          |
| 29 |                                                           |    |                                                                                                                                                                                                                                                                                          |
| 30 |                                                           |    |                                                                                                                                                                                                                                                                                          |
| 31 |                                                           |    |                                                                                                                                                                                                                                                                                          |
| 32 | <b>Methods: Participants, interventions, and outcomes</b> |    |                                                                                                                                                                                                                                                                                          |
| 33 |                                                           |    |                                                                                                                                                                                                                                                                                          |
| 34 | Study setting                                             | 9  | Description of study settings (eg, community clinic, academic hospital) and list of countries where data will be collected. Reference to where list of study sites can be obtained                                                                                                       |
| 35 |                                                           |    | 5                                                                                                                                                                                                                                                                                        |
| 36 |                                                           |    |                                                                                                                                                                                                                                                                                          |
| 37 |                                                           |    |                                                                                                                                                                                                                                                                                          |
| 38 |                                                           |    |                                                                                                                                                                                                                                                                                          |
| 39 |                                                           |    |                                                                                                                                                                                                                                                                                          |
| 40 |                                                           |    |                                                                                                                                                                                                                                                                                          |
| 41 |                                                           |    |                                                                                                                                                                                                                                                                                          |
| 42 |                                                           |    |                                                                                                                                                                                                                                                                                          |
| 43 |                                                           |    |                                                                                                                                                                                                                                                                                          |
| 44 |                                                           |    |                                                                                                                                                                                                                                                                                          |
| 45 |                                                           |    |                                                                                                                                                                                                                                                                                          |
| 46 |                                                           |    |                                                                                                                                                                                                                                                                                          |

1  
2  
3  
4  
5  
6  
7  
8  
9  
10  
11  
12  
13  
14  
15  
16  
17  
18  
19  
20  
21  
22  
23  
24  
25  
26  
27  
28  
29  
30  
31  
32  
33  
34  
35  
36  
37  
38  
39  
40  
41  
42  
43  
44  
45  
46

|                      |     |                                                                                                                                                                                                                                                                                                                                                                                |                                                                            |
|----------------------|-----|--------------------------------------------------------------------------------------------------------------------------------------------------------------------------------------------------------------------------------------------------------------------------------------------------------------------------------------------------------------------------------|----------------------------------------------------------------------------|
| Eligibility criteria | 10  | Inclusion and exclusion criteria for participants. If applicable, eligibility criteria for study centres and individuals who will perform the interventions (eg, surgeons, psychotherapists)                                                                                                                                                                                   | 5                                                                          |
| Interventions        | 11a | Interventions for each group with sufficient detail to allow replication, including how and when they will be administered                                                                                                                                                                                                                                                     | 5-6                                                                        |
|                      | 11b | Criteria for discontinuing or modifying allocated interventions for a given trial participant (eg, drug dose change in response to harms, participant request, or improving/worsening disease)                                                                                                                                                                                 | 14 (End of protocol)<br>And N/4 (no dose modifications)                    |
|                      | 11c | Strategies to improve adherence to intervention protocols, and any procedures for monitoring adherence (eg, drug tablet return, laboratory tests)                                                                                                                                                                                                                              | 6 (two turns of validations of the PROADAPT booklet by candidate patients) |
|                      | 11d | Relevant concomitant care and interventions that are permitted or prohibited during the trial                                                                                                                                                                                                                                                                                  | N/A                                                                        |
| Outcomes             | 12  | Primary, secondary, and other outcomes, including the specific measurement variable (eg, systolic blood pressure), analysis metric (eg, change from baseline, final value, time to event), method of aggregation (eg, median, proportion), and time point for each outcome. Explanation of the clinical relevance of chosen efficacy and harm outcomes is strongly recommended | 11-12                                                                      |
| Participant timeline | 13  | Time schedule of enrolment, interventions (including any run-ins and washouts), assessments, and visits for participants. A schematic diagram is highly recommended (see Figure)                                                                                                                                                                                               | 8-9                                                                        |
| Sample size          | 14  | Estimated number of participants needed to achieve study objectives and how it was determined, including clinical and statistical assumptions supporting any sample size calculations                                                                                                                                                                                          | 12-13 (Sample size calculation)                                            |



1  
2  
3  
4 Recruitment 15 Strategies for achieving adequate participant enrolment to reach target sample size N/A (no problem for accrual)  
5  
6

7 **Methods: Assignment of interventions (for controlled trials)**

N/A

8 Allocation:

9  
10 Sequence generation 16a Method of generating the allocation sequence (eg, computer-generated random numbers), and list of any factors for stratification. To reduce predictability of a random sequence, details of any planned restriction (eg, blocking) should be provided in a separate document that is unavailable to those who enrol participants or assign interventions -  
11  
12  
13  
14  
15  
16  
17 Allocation concealment 16b Mechanism of implementing the allocation sequence (eg, central telephone; sequentially numbered, opaque, sealed envelopes), describing any steps to conceal the sequence until interventions are assigned -  
18  
19  
20  
21  
22 Implementation 16c Who will generate the allocation sequence, who will enrol participants, and who will assign participants to interventions -  
23  
24  
25 Blinding (masking) 17a Who will be blinded after assignment to interventions (eg, trial participants, care providers, outcome assessors, data analysts), and how -  
26  
27  
28 17b If blinded, circumstances under which unblinding is permissible, and procedure for revealing a participant's allocated intervention during the trial -  
29  
30  
31

32 **Methods: Data collection, management, and analysis**

1  
2  
3  
4  
5  
6  
7  
8  
9  
10  
11  
12  
13  
14  
15  
16  
17  
18  
19  
20  
21  
22  
23  
24  
25  
26  
27  
28  
29  
30  
31  
32  
33  
34  
35  
36  
37  
38  
39  
40  
41  
42  
43  
44  
45  
46

|                         |     |                                                                                                                                                                                                                                                                                                                                                                                                              |                                                  |
|-------------------------|-----|--------------------------------------------------------------------------------------------------------------------------------------------------------------------------------------------------------------------------------------------------------------------------------------------------------------------------------------------------------------------------------------------------------------|--------------------------------------------------|
| Data collection methods | 18a | Plans for assessment and collection of outcome, baseline, and other trial data, including any related processes to promote data quality (eg, duplicate measurements, training of assessors) and a description of study instruments (eg, questionnaires, laboratory tests) along with their reliability and validity, if known. Reference to where data collection forms can be found, if not in the protocol | Table 3                                          |
|                         | 18b | Plans to promote participant retention and complete follow-up, including list of any outcome data to be collected for participants who discontinue or deviate from intervention protocols                                                                                                                                                                                                                    | N/A                                              |
| Data management         | 19  | Plans for data entry, coding, security, and storage, including any related processes to promote data quality (eg, double data entry; range checks for data values). Reference to where details of data management procedures can be found, if not in the protocol                                                                                                                                            | 13 (Data management and statistical analyses)    |
| Statistical methods     | 20a | Statistical methods for analysing primary and secondary outcomes. Reference to where other details of the statistical analysis plan can be found, if not in the protocol                                                                                                                                                                                                                                     | 13-14 (Data management and statistical analyses) |
|                         | 20b | Methods for any additional analyses (eg, subgroup and adjusted analyses)                                                                                                                                                                                                                                                                                                                                     | N/A                                              |
|                         | 20c | Definition of analysis population relating to protocol non-adherence (eg, as randomised analysis), and any statistical methods to handle missing data (eg, multiple imputation)                                                                                                                                                                                                                              | N/A                                              |

**Methods: Monitoring**

|    |                                 |     |                                                                                                                                                                                                                                                                                                                                       |                                                                   |
|----|---------------------------------|-----|---------------------------------------------------------------------------------------------------------------------------------------------------------------------------------------------------------------------------------------------------------------------------------------------------------------------------------------|-------------------------------------------------------------------|
| 1  |                                 |     |                                                                                                                                                                                                                                                                                                                                       |                                                                   |
| 2  |                                 |     |                                                                                                                                                                                                                                                                                                                                       |                                                                   |
| 3  |                                 |     |                                                                                                                                                                                                                                                                                                                                       |                                                                   |
| 4  | Data monitoring                 | 21a | Composition of data monitoring committee (DMC); summary of its role and reporting structure; statement of whether it is independent from the sponsor and competing interests; and reference to where further details about its charter can be found, if not in the protocol. Alternatively, an explanation of why a DMC is not needed | 14 (Data Monitoring)                                              |
| 5  |                                 |     |                                                                                                                                                                                                                                                                                                                                       |                                                                   |
| 6  |                                 |     |                                                                                                                                                                                                                                                                                                                                       |                                                                   |
| 7  |                                 |     |                                                                                                                                                                                                                                                                                                                                       |                                                                   |
| 8  |                                 |     |                                                                                                                                                                                                                                                                                                                                       |                                                                   |
| 9  |                                 |     |                                                                                                                                                                                                                                                                                                                                       |                                                                   |
| 10 |                                 |     |                                                                                                                                                                                                                                                                                                                                       |                                                                   |
| 11 |                                 | 21b | Description of any interim analyses and stopping guidelines, including who will have access to these interim results and make the final decision to terminate the trial                                                                                                                                                               | N/A                                                               |
| 12 |                                 |     |                                                                                                                                                                                                                                                                                                                                       |                                                                   |
| 13 |                                 |     |                                                                                                                                                                                                                                                                                                                                       |                                                                   |
| 14 |                                 |     |                                                                                                                                                                                                                                                                                                                                       |                                                                   |
| 15 | Harms                           | 22  | Plans for collecting, assessing, reporting, and managing solicited and spontaneously reported adverse events and other unintended effects of trial interventions or trial conduct                                                                                                                                                     | 11 (Secondary outcomes: NCI CTCAE, QOL)                           |
| 16 |                                 |     |                                                                                                                                                                                                                                                                                                                                       |                                                                   |
| 17 |                                 |     |                                                                                                                                                                                                                                                                                                                                       |                                                                   |
| 18 |                                 |     |                                                                                                                                                                                                                                                                                                                                       |                                                                   |
| 19 | Auditing                        | 23  | Frequency and procedures for auditing trial conduct, if any, and whether the process will be independent from investigators and the sponsor                                                                                                                                                                                           | N/A                                                               |
| 20 |                                 |     |                                                                                                                                                                                                                                                                                                                                       |                                                                   |
| 21 |                                 |     |                                                                                                                                                                                                                                                                                                                                       |                                                                   |
| 22 |                                 |     |                                                                                                                                                                                                                                                                                                                                       |                                                                   |
| 23 | <b>Ethics and dissemination</b> |     |                                                                                                                                                                                                                                                                                                                                       |                                                                   |
| 24 |                                 |     |                                                                                                                                                                                                                                                                                                                                       |                                                                   |
| 25 | Research ethics approval        | 24  | Plans for seeking research ethics committee/institutional review board (REC/IRB) approval                                                                                                                                                                                                                                             | 10 (Ethical and legal considerations)                             |
| 26 |                                 |     |                                                                                                                                                                                                                                                                                                                                       |                                                                   |
| 27 |                                 |     |                                                                                                                                                                                                                                                                                                                                       |                                                                   |
| 28 | Protocol amendments             | 25  | Plans for communicating important protocol modifications (eg, changes to eligibility criteria, outcomes, analyses) to relevant parties (eg, investigators, REC/IRBs, trial participants, trial registries, journals, regulators)                                                                                                      | 10 (Ethical and legal considerations)<br>14 (Protocol amendments) |
| 29 |                                 |     |                                                                                                                                                                                                                                                                                                                                       |                                                                   |
| 30 |                                 |     |                                                                                                                                                                                                                                                                                                                                       |                                                                   |
| 31 |                                 |     |                                                                                                                                                                                                                                                                                                                                       |                                                                   |
| 32 |                                 |     |                                                                                                                                                                                                                                                                                                                                       |                                                                   |
| 33 |                                 |     |                                                                                                                                                                                                                                                                                                                                       |                                                                   |
| 34 | Consent or assent               | 26a | Who will obtain informed consent or assent from potential trial participants or authorised surrogates, and how (see Item 32)                                                                                                                                                                                                          | 10-11 (Ethical and legal considerations)                          |
| 35 |                                 |     |                                                                                                                                                                                                                                                                                                                                       |                                                                   |
| 36 |                                 |     |                                                                                                                                                                                                                                                                                                                                       |                                                                   |
| 37 |                                 |     |                                                                                                                                                                                                                                                                                                                                       |                                                                   |
| 38 |                                 | 26b | Additional consent provisions for collection and use of participant data and biological specimens in ancillary studies, if applicable                                                                                                                                                                                                 | N/A                                                               |
| 39 |                                 |     |                                                                                                                                                                                                                                                                                                                                       |                                                                   |
| 40 |                                 |     |                                                                                                                                                                                                                                                                                                                                       |                                                                   |
| 41 |                                 |     |                                                                                                                                                                                                                                                                                                                                       |                                                                   |
| 42 |                                 |     |                                                                                                                                                                                                                                                                                                                                       |                                                                   |
| 43 |                                 |     |                                                                                                                                                                                                                                                                                                                                       |                                                                   |
| 44 |                                 |     |                                                                                                                                                                                                                                                                                                                                       |                                                                   |
| 45 |                                 |     |                                                                                                                                                                                                                                                                                                                                       |                                                                   |
| 46 |                                 |     |                                                                                                                                                                                                                                                                                                                                       |                                                                   |

|    |                               |     |                                                                                                                                                                                                                                                                                     |                                         |
|----|-------------------------------|-----|-------------------------------------------------------------------------------------------------------------------------------------------------------------------------------------------------------------------------------------------------------------------------------------|-----------------------------------------|
| 1  |                               |     |                                                                                                                                                                                                                                                                                     |                                         |
| 2  |                               |     |                                                                                                                                                                                                                                                                                     |                                         |
| 3  |                               |     |                                                                                                                                                                                                                                                                                     |                                         |
| 4  | Confidentiality               | 27  | How personal information about potential and enrolled participants will be collected, shared, and maintained in order to protect confidentiality before, during, and after the trial                                                                                                | 14 (Confidentiality)                    |
| 5  |                               |     |                                                                                                                                                                                                                                                                                     |                                         |
| 6  |                               |     |                                                                                                                                                                                                                                                                                     |                                         |
| 7  |                               |     |                                                                                                                                                                                                                                                                                     |                                         |
| 8  | Declaration of interests      | 28  | Financial and other competing interests for principal investigators for the overall trial and each study site                                                                                                                                                                       | 17 (Competing interests)                |
| 9  |                               |     |                                                                                                                                                                                                                                                                                     |                                         |
| 10 |                               |     |                                                                                                                                                                                                                                                                                     |                                         |
| 11 | Access to data                | 29  | Statement of who will have access to the final trial dataset, and disclosure of contractual agreements that limit such access for investigators                                                                                                                                     | 17 (Availability of data and materials) |
| 12 |                               |     |                                                                                                                                                                                                                                                                                     |                                         |
| 13 |                               |     |                                                                                                                                                                                                                                                                                     |                                         |
| 14 | Ancillary and post-trial care | 30  | Provisions, if any, for ancillary and post-trial care, and for compensation to those who suffer harm from trial participation                                                                                                                                                       | N/A                                     |
| 15 |                               |     |                                                                                                                                                                                                                                                                                     |                                         |
| 16 |                               |     |                                                                                                                                                                                                                                                                                     |                                         |
| 17 |                               |     |                                                                                                                                                                                                                                                                                     |                                         |
| 18 | Dissemination policy          | 31a | Plans for investigators and sponsor to communicate trial results to participants, healthcare professionals, the public, and other relevant groups (eg, via publication, reporting in results databases, or other data sharing arrangements), including any publication restrictions | 15 (Dissemination policy)               |
| 19 |                               |     |                                                                                                                                                                                                                                                                                     |                                         |
| 20 |                               |     |                                                                                                                                                                                                                                                                                     |                                         |
| 21 |                               |     |                                                                                                                                                                                                                                                                                     |                                         |
| 22 |                               |     |                                                                                                                                                                                                                                                                                     |                                         |
| 23 |                               |     |                                                                                                                                                                                                                                                                                     |                                         |
| 24 |                               | 31b | Authorship eligibility guidelines and any intended use of professional writers                                                                                                                                                                                                      | 15 (Dissemination policy), N/A          |
| 25 |                               |     |                                                                                                                                                                                                                                                                                     |                                         |
| 26 |                               |     |                                                                                                                                                                                                                                                                                     |                                         |
| 27 |                               | 31c | Plans, if any, for granting public access to the full protocol, participant-level dataset, and statistical code                                                                                                                                                                     | N/A                                     |
| 28 |                               |     |                                                                                                                                                                                                                                                                                     |                                         |
| 29 |                               |     |                                                                                                                                                                                                                                                                                     |                                         |
| 30 | <b>Appendices</b>             |     |                                                                                                                                                                                                                                                                                     |                                         |
| 31 |                               |     |                                                                                                                                                                                                                                                                                     |                                         |
| 32 | Informed consent materials    | 32  | Model consent form and other related documentation given to participants and authorised surrogates                                                                                                                                                                                  | Annex 1 (in French)                     |
| 33 |                               |     |                                                                                                                                                                                                                                                                                     |                                         |
| 34 |                               |     |                                                                                                                                                                                                                                                                                     |                                         |
| 35 | Biological specimens          | 33  | Plans for collection, laboratory evaluation, and storage of biological specimens for genetic or molecular analysis in the current trial and for future use in ancillary studies, if applicable                                                                                      | N/A                                     |
| 36 |                               |     |                                                                                                                                                                                                                                                                                     |                                         |
| 37 |                               |     |                                                                                                                                                                                                                                                                                     |                                         |
| 38 |                               |     |                                                                                                                                                                                                                                                                                     |                                         |
| 39 |                               |     |                                                                                                                                                                                                                                                                                     |                                         |
| 40 |                               |     |                                                                                                                                                                                                                                                                                     |                                         |
| 41 |                               |     |                                                                                                                                                                                                                                                                                     |                                         |
| 42 |                               |     |                                                                                                                                                                                                                                                                                     |                                         |
| 43 |                               |     |                                                                                                                                                                                                                                                                                     |                                         |
| 44 |                               |     |                                                                                                                                                                                                                                                                                     |                                         |
| 45 |                               |     |                                                                                                                                                                                                                                                                                     |                                         |
| 46 |                               |     |                                                                                                                                                                                                                                                                                     |                                         |

1  
2  
3 \*It is strongly recommended that this checklist be read in conjunction with the SPIRIT 2013 Explanation & Elaboration for important clarification on  
4 the items. Amendments to the protocol should be tracked and dated. The SPIRIT checklist is copyrighted by the SPIRIT Group under the Creative  
5 Commons "[Attribution-NonCommercial-NoDerivs 3.0 Unported](#)" license.  
6  
7  
8  
9  
10  
11  
12  
13  
14  
15  
16  
17  
18  
19  
20  
21  
22  
23  
24  
25  
26  
27  
28  
29  
30  
31  
32  
33  
34  
35  
36  
37  
38  
39  
40  
41  
42  
43  
44  
45  
46

For peer review only

# BMJ Open

## Feasibility of a prehabilitation programme dedicated to older cancer patients before complex medical-surgical procedures: the PROADAPT pilot study protocol

|                               |                                                                                                                                                                                                                                                                                                                                                                                                                                                                                                                                                                                                                                                                                                                                                                                                                                                                                                                                                                                                                                                                                                                                                                                                                                                                                                                                                                                                                                                                                                                                                                                                                                                                                                                                                                                                                                                                                                                                                                                                                                                                                                                                           |
|-------------------------------|-------------------------------------------------------------------------------------------------------------------------------------------------------------------------------------------------------------------------------------------------------------------------------------------------------------------------------------------------------------------------------------------------------------------------------------------------------------------------------------------------------------------------------------------------------------------------------------------------------------------------------------------------------------------------------------------------------------------------------------------------------------------------------------------------------------------------------------------------------------------------------------------------------------------------------------------------------------------------------------------------------------------------------------------------------------------------------------------------------------------------------------------------------------------------------------------------------------------------------------------------------------------------------------------------------------------------------------------------------------------------------------------------------------------------------------------------------------------------------------------------------------------------------------------------------------------------------------------------------------------------------------------------------------------------------------------------------------------------------------------------------------------------------------------------------------------------------------------------------------------------------------------------------------------------------------------------------------------------------------------------------------------------------------------------------------------------------------------------------------------------------------------|
| Journal:                      | <i>BMJ Open</i>                                                                                                                                                                                                                                                                                                                                                                                                                                                                                                                                                                                                                                                                                                                                                                                                                                                                                                                                                                                                                                                                                                                                                                                                                                                                                                                                                                                                                                                                                                                                                                                                                                                                                                                                                                                                                                                                                                                                                                                                                                                                                                                           |
| Manuscript ID                 | bmjopen-2020-042960.R3                                                                                                                                                                                                                                                                                                                                                                                                                                                                                                                                                                                                                                                                                                                                                                                                                                                                                                                                                                                                                                                                                                                                                                                                                                                                                                                                                                                                                                                                                                                                                                                                                                                                                                                                                                                                                                                                                                                                                                                                                                                                                                                    |
| Article Type:                 | Protocol                                                                                                                                                                                                                                                                                                                                                                                                                                                                                                                                                                                                                                                                                                                                                                                                                                                                                                                                                                                                                                                                                                                                                                                                                                                                                                                                                                                                                                                                                                                                                                                                                                                                                                                                                                                                                                                                                                                                                                                                                                                                                                                                  |
| Date Submitted by the Author: | 20-Feb-2021                                                                                                                                                                                                                                                                                                                                                                                                                                                                                                                                                                                                                                                                                                                                                                                                                                                                                                                                                                                                                                                                                                                                                                                                                                                                                                                                                                                                                                                                                                                                                                                                                                                                                                                                                                                                                                                                                                                                                                                                                                                                                                                               |
| Complete List of Authors:     | <p>Roche, Mélanie; Hospices Civils de Lyon, Plateforme Transversale de Recherche de l'ICHCL</p> <p>Ravot, Christine; Hospices Civils de Lyon, Geriatrics unit. Centre Hospitalier Lyon Sud</p> <p>Malapert, Amélie; Hospices Civils de Lyon, Plateforme Transversale de Recherche de l'ICHCL</p> <p>Paget-Bailly, Sophie; University Hospital Centre Besancon, Methodology and Quality of Life Unit in Oncology; Université Bourgogne Franche-Comté, INSERM, EFS BFC, UMR1098, Interactions Hôte-Greffon-Tumeur/Ingénierie Cellulaire Et Génique</p> <p>Garandeau, Charlene; Hospices Civils de Lyon, Direction à la Recherche Clinique et à l'Innovation</p> <p>Pitiot, Virginie; Hospices Civils de Lyon, Plateforme Transversale de Recherche de l'ICHCL</p> <p>Tomatis, Mélanie; Hospices Civils de Lyon, Geriatrics unit. Centre Hospitalier Lyon Sud</p> <p>Riche, Benjamin; Hospices Civils de Lyon, Service de Biostatistique - Bioinformatique, Pôle Santé Publique; Université de Lyon, Laboratoire de Biométrie et Biologie Évolutive CNRS UMR 5558, Équipe Biostatistiques Santé</p> <p>Galamand, Béatrice; Hospices Civils de Lyon, Geriatrics unit. Centre Hospitalier Lyon Sud</p> <p>Granger, Marion; Hospices Civils de Lyon, Geriatrics unit; Centre Hospitalier de Chambéry</p> <p>Barbavara, Claire; Hospices Civils de Lyon, Geriatrics unit</p> <p>Bourgeois, Chrystelle; Centre Hospitalier Annecy Genevois, Medical Oncology</p> <p>Genest, Evelyne; Hospices Civils de Lyon, Geriatrics unit</p> <p>Stefani, Laetitia; Centre Hospitalier Annecy Genevois, Medical oncology</p> <p>Haïne, Max; Hôpital Nord-Ouest, Pôle de gérontologie et Médecine de Réadaptation</p> <p>Castel-Kremer, Elisabeth; Hospices Civils de Lyon, Geriatrics unit. Hôpital Edouard Herriot.</p> <p>Morel-Soldner, Isabelle; Hospices Civils de Lyon, Geriatrics unit. Centre Hospitalier de la Croix Rousse</p> <p>Collange, Vincent; Medipole Lyon-Villeurbanne, Département anesthésie réanimation</p> <p>Le Saux, Olivia; Centre de Recherche en Cancerologie de Lyon, Therapeutic targeting of the tumor cell and its immune</p> |

|                                    |                                                                                                                                                                                                                                                                                                                                                       |
|------------------------------------|-------------------------------------------------------------------------------------------------------------------------------------------------------------------------------------------------------------------------------------------------------------------------------------------------------------------------------------------------------|
|                                    | microenvironnement<br>Dayde, David; Hospices Civils de Lyon, Plateforme Transversale de Recherche de l'ICHCL<br>Falandry, Claire; Hospices Civils de Lyon, Geriatrics unit, Centre Hospitalier Lyon Sud; University of Lyon, CarMeN Laboratory, Inserm U1060, INRA U1397, Université Claude Bernard Lyon 1, INSA Lyon, Charles Mérieux Medical School |
| <b>Primary Subject Heading</b> :   | Oncology                                                                                                                                                                                                                                                                                                                                              |
| <b>Secondary Subject Heading</b> : | Geriatric medicine, Surgery                                                                                                                                                                                                                                                                                                                           |
| <b>Keywords</b> :                  | Adult oncology < ONCOLOGY, GERIATRIC MEDICINE, REHABILITATION MEDICINE, Adult surgery < SURGERY                                                                                                                                                                                                                                                       |
|                                    |                                                                                                                                                                                                                                                                                                                                                       |

SCHOLARONE™  
Manuscripts



I, the Submitting Author has the right to grant and does grant on behalf of all authors of the Work (as defined in the below author licence), an exclusive licence and/or a non-exclusive licence for contributions from authors who are: i) UK Crown employees; ii) where BMJ has agreed a CC-BY licence shall apply, and/or iii) in accordance with the terms applicable for US Federal Government officers or employees acting as part of their official duties; on a worldwide, perpetual, irrevocable, royalty-free basis to BMJ Publishing Group Ltd ("BMJ") its licensees and where the relevant Journal is co-owned by BMJ to the co-owners of the Journal, to publish the Work in this journal and any other BMJ products and to exploit all rights, as set out in our [licence](#).

The Submitting Author accepts and understands that any supply made under these terms is made by BMJ to the Submitting Author unless you are acting as an employee on behalf of your employer or a postgraduate student of an affiliated institution which is paying any applicable article publishing charge ("APC") for Open Access articles. Where the Submitting Author wishes to make the Work available on an Open Access basis (and intends to pay the relevant APC), the terms of reuse of such Open Access shall be governed by a Creative Commons licence – details of these licences and which [Creative Commons](#) licence will apply to this Work are set out in our licence referred to above.

Other than as permitted in any relevant BMJ Author's Self Archiving Policies, I confirm this Work has not been accepted for publication elsewhere, is not being considered for publication elsewhere and does not duplicate material already published. I confirm all authors consent to publication of this Work and authorise the granting of this licence.



1  
2  
3 **1 Feasibility of a prehabilitation programme dedicated to older**  
4  
5  
6 **2 cancer patients before complex medical-surgical procedures: the**  
7  
8  
9 **3 PROADAPT pilot study protocol**

12 4 Mélanie Roche (melanie.roche02@chu-lyon.fr)

14 5 Christine Ravot (christine.ravot@chu-lyon.fr)

16 6 Amélie Malapert ([amelie.malapert@chu-lyon.fr](mailto:amelie.malapert@chu-lyon.fr))

18 7 Sophie Paget-Bailly (spaget@chu-besancon.fr)

20 8 Charlène Garandau (charlene.garandau@chu-lyon.fr)

22 9 Virginie Pitiot (virginie.pitiot@chu-lyon.fr)

24 10 Mélanie Tomatis (melanie.tomatis@chu-lyon.fr)

26 11 Benjamin Riche (benjamin.riche@chu-lyon.fr)

28 12 Béatrice Galamand (beatrice.galamand@chu-lyon.fr)

30 13 Marion Granger (mariongranger@outlook.fr)

32 14 Claire Barbavara (claire.barbavara@gmail.com)

34 15 Chrystelle Bourgeois (cbourgeois@ch-annecygenevois.fr)

36 16 Evelyne Genest (evelyne.genest@chu-lyon.fr)

38 17 Laetitia Stefani (lstefani@ch-annecygenevois.fr)

40 18 Max Haïne (mhaine@lhospitalnordouest.fr)

42 19 Elisabeth Castel Kremer (Elisabeth.castel-kremer@chu-lyon.fr)

44 20 Isabelle Morel-Soldner (isabelle.morel-soldner@chu-lyon.fr)

46 21 Vincent Collange (collangev@gmail.com)

48 22 Olivia Le Saux (Olivia.LESAUX@lyon.unicancer.fr)

50 23 David Dayde (david.dayde@chu-lyon.fr)

52 24 Claire Falandry ([claire.falandry@chu-lyon.fr](mailto:claire.falandry@chu-lyon.fr)) (Corresponding author)

1  
2  
3 25 Corresponding email address: [claire.falandry@chu-lyon.fr](mailto:claire.falandry@chu-lyon.fr)  
4  
5 26 on behalf of PROADAPT working group  
6  
7  
8 27  
9  
10 28 Mélanie Roche, Hospices Civils de Lyon, Plateforme Transversale de Recherche de l'ICHCL,  
11  
12 29 Pierre-Bénite, France  
13  
14 30 Christine Ravot, Hospices Civils de Lyon, Service de gériatrie, Centre Hospitalier Lyon Sud  
15  
16 31 Pierre-Bénite, France  
17  
18  
19 32 Amélie Malapert, Hospices Civils de Lyon, Plateforme Transversale de Recherche de  
20  
21 33 l'ICHCL, Pierre-Bénite, France  
22  
23  
24 34 Sophie Paget-Bailly, University Hospital Centre Besancon, Unité de Méthodologie et de  
25  
26 35 Qualité de Vie en Cancérologie, Université Bourgogne Franche-Comté, INSERM, EFS BFC,  
27  
28 36 UMR1098, Interactions Hôte-Greffon-Tumeur/Ingénierie Cellulaire Et Génique, Besançon,  
29  
30 37 France  
31  
32  
33 38 Charlène Garandea, Hospices Civils de Lyon, Direction de la Recherche Clinique et de  
34  
35 39 l'Innovation, Lyon, France  
36  
37  
38 40 Virginie Pitiot, Hospices Civils de Lyon, Plateforme Transversale de Recherche de l'ICHCL,  
39  
40 41 Pierre-Bénite, France  
41  
42  
42 42 Mélanie Tomatis, Hospices Civils de Lyon, Service de Gériatrie. Centre Hospitalier Lyon  
43  
44 43 Sud, Pierre-Bénite, France  
45  
46  
46 44 Benjamin Riche, Hospices Civils de Lyon, Service de Biostatistique -Bioinformatique, Pôle  
47  
48 45 Santé Publique; Université de Lyon, Laboratoire de Biométrie et Biologie Évolutive CNRS  
49  
50  
51 46 UMR 5558, Équipe Biostatistiques Santé, Lyon, France  
52  
53  
53 47 Béatrice Galamand, Hospices Civils de Lyon, Service de Gériatrie. Centre Hospitalier Lyon  
54  
55 48 Sud, Pierre-Bénite, France  
56  
57  
58  
59  
60

- 1  
2  
3 49 Marion Granger, Hospices Civils de Lyon, Service de Gériatrie; Centre Hospitalier de  
4  
5 50 Chambéry, Chambéry, France, Pierre-Bénite, France  
6  
7 51 Claire Barbavara, Hospices Civils de Lyon, Service de Gériatrie, Centre Hospitalier Lyon  
8  
9 52 Sud, Pierre-Bénite, France  
10  
11  
12 53 Chrystelle Bourgeois, Centre Hospitalier Annecy Genevois, Service d'Oncologie médicale,  
13  
14 54 Pringy, France  
15  
16  
17 55 Evelyne Genest, Hospices Civils de Lyon, Service de Gériatrie, Centre Hospitalier Lyon Sud,  
18  
19 56 Pierre-Bénite, France  
20  
21  
22 57 Laetitia Stefani, Centre Hospitalier Annecy Genevois, Service d'oncologie médicale, Pringy,  
23  
24 58 France  
25  
26 59 Max Haïne, Hôpital Nord-Ouest, Pôle de gériatrie et Médecine de Réadaptation, Gleizé,  
27  
28 60 France  
29  
30  
31 61 Elisabeth Castel-Kremer, Hospices Civils de Lyon, Service de Gériatrie. Hôpital Edouard  
32  
33 62 Herriot, Lyon, France  
34  
35 63 Isabelle Morel-Soldner,; Hospices Civils de Lyon, Service de Gériatrie, Centre Hospitalier de  
36  
37 64 la Croix Rousse  
38  
39  
40 65 Vincent Collange, Medipole Lyon-Villeurbanne, Département anesthésie réanimation,  
41  
42 66 Villeurbanne, France  
43  
44  
45 67 Olivia Le Saux, Centre de Recherche en Cancérologie de Lyon, Ciblage de la tumeur et de  
46  
47 68 son environnement immunitaire, Lyon, France  
48  
49 69 David Dayde, Hospices Civils de Lyon, Plateforme Transversale de Recherche de l'ICHCL,  
50  
51 70 Pierre-Bénite, France  
52  
53  
54 71 Claire Falandry, Hospices Civils de Lyon, Service de Gériatrie, Centre Hospitalier Lyon Sud,  
55  
56 72 Pierre-Bénite, France and Université de Lyon, CarMeN Laboratory, Inserm U1060, INRA  
57  
58  
59  
60

- 1  
2  
3 73 U1397, Université Claude Bernard Lyon 1, INSA Lyon, Faculté de Médecine et de  
4  
5 74 Maïeutique Charles Mérieux, Pierre-Bénite, France  
6  
7  
8  
9  
10  
11  
12  
13  
14  
15  
16  
17  
18  
19  
20  
21  
22  
23  
24  
25  
26  
27  
28  
29  
30  
31  
32  
33  
34  
35  
36  
37  
38  
39  
40  
41  
42  
43  
44  
45  
46  
47  
48  
49  
50  
51  
52  
53  
54  
55  
56  
57  
58  
59  
60

For peer review only

1  
2  
3 75 **Abstract**  
4

5 76 **Background:** Aging is associated with an increased prevalence of co-morbidities and  
6  
7 77 sarcopenia as well as a decline of functional reserve of multiple organ systems, which may lead,  
8  
9 78 in the context of the disease- and/or treatment-related stress, to functional deconditioning. The  
10  
11 79 multicomponent “PROADAPT” intervention was developed multi-professionally to implement  
12  
13 80 prehabilitation in older cancer patients.  
14  
15

16  
17 81 **Methods:** The PROADAPT pilot study is an interventional, non-comparative, prospective,  
18  
19 82 multicentre study. It will include 122 patients oriented to complex medical-surgical curative  
20  
21 83 procedures (major surgery or radiation therapy with or without chemotherapy). After informed  
22  
23 84 consent, patients will undergo a comprehensive geriatric assessment and will be offered a  
24  
25 85 prehabilitation kit that includes an advice booklet with personalised objectives and respiratory  
26  
27 86 rehabilitation devices. Patients will then be called weekly and monitored for physical and  
28  
29 87 respiratory rehabilitation, pre-operative re-nutrition, motivational counselling, and iatrogenic  
30  
31 88 prevention. Six outpatient visits will be planned: at inclusion, a few days before the procedure,  
32  
33 89 and at 1, 3, 6 and 12 months after the end of the procedure. The main outcome of the study is  
34  
35 90 the feasibility of the intervention, defined as the ability to perform at least one of the  
36  
37 91 components of the programme. Clinical data collected will include patient- and cancer-specific  
38  
39 92 characteristics.  
40  
41  
42  
43

44 93 **Ethics and dissemination:** The study protocol was approved by the Ile de France 8 ethics  
45  
46 94 committee on 5 June 2018. The results of the primary and secondary objectives will be  
47  
48 95 published in peer-reviewed journals. ClinicalTrials registration: NCT03659123.  
49  
50

51 96 **Keywords:** oncogeriatrics; prehabilitation; motivation; sarcopenia; older cancer patients; care  
52  
53 97 pathway.  
54  
55

56 98

57  
58 99  
59  
60

1  
2  
3 100 **Article summary**  
4

5 101 Strengths and limitations of this study  
6

7  
8 102 - The PROADAPT programme is a prehabilitation programme specifically tailored for  
9  
10 103 older cancer patients

11  
12 104 - The programme was designed according to a multidisciplinary analysis of available  
13  
14 105 evidence and according to a multistep validation process involving patients

15  
16  
17 106 - The PROADAPT pilot study is a prospective and multicentre trial designed to evaluate  
18  
19 107 the feasibility of the intervention

20  
21  
22 108 - Different secondary outcomes, including quality of life, will be evaluated to better adapt  
23  
24 109 the programme to patient specificities

25  
26 110 A specific attention will be paid to programme safety and patient compliance to the  
27  
28 111 programme.  
29

30  
31 112

32  
33 113  
34  
35  
36  
37  
38  
39  
40  
41  
42  
43  
44  
45  
46  
47  
48  
49  
50  
51  
52  
53  
54  
55  
56  
57  
58  
59  
60

ew only

## 114 **Introduction**

115 Many oncological situations involve complex medical-surgical procedures that increase the risk  
116 of patient deconditioning in older and/or sarcopenic patients (1). This may lead to a disabling  
117 cascade, a “domino effect”, defined as the succession of adverse events in response to a primary  
118 stress (2). This is illustrated by increased morbidity and mortality (3), but also a higher risk of  
119 unplanned hospitalisations for geriatric events, defined as immobilisation syndrome, acute  
120 confusion, undernutrition, falls, *de novo* urinary incontinence, and adverse drug events (4).  
121 These generate frustration, appeals by patients and their families, additional hospital costs (5),  
122 and more importantly, a reduced duration of life without disability (6). One of the responses to  
123 this situation is enhanced rehabilitation after surgery (7).

124 In order to reduce complications after surgery, pre-operative rehabilitation (or prehabilitation)  
125 has often been considered for the general population (8). The majority of the programmes  
126 include nutrition, physical activity, motivational coaching, and, for some tobacco cessation (8);  
127 the level of evidence is high for pre-operative nutrition (9), but it is low for physical exercise,  
128 due to heterogeneous programmes with often poor compliance (10), and is deemed insufficient  
129 considering psychological preparation (11). Some programmes adapted interventions on  
130 nutrition, physical activity, and motivational coaching to geriatric patients but conclusions as  
131 to the effectiveness of these are difficult to draw (12). It is also of note that Carli et al. did not  
132 report any significant difference in the efficacy of prehabilitation versus post-operative  
133 rehabilitation only in 110 frail patients aged 65 years or above operated on for colon cancer  
134 (13), questioning the ability of standard prehabilitation to improve outcomes for frail older  
135 patients.

136 It would, therefore, potentially be of interest to widen the spectrum of interventions included in  
137 prehabilitation of older patients. To date, the other interventions known to prevent hospital-  
138 related geriatric deconditioning include comprehensive geriatric assessment (14,15), iatrogenic

1  
2  
3 139 prevention (drug and care system-related) (16,17), and hospital-to-home transition to limit the  
4  
5 140 risk of early readmission of patients (18). In addition, some degree of individualization is also  
6  
7 141 needed since cancer in the older patient is often associated with comorbidities, particularly  
8  
9 142 cardiovascular disease (19,20), and the older population also has a higher risk of loss of  
10  
11 143 autonomy and cognitive impairment, which can be increased with surgery (21–23).  
12  
13  
14 144 In this context, and after a systematic analysis of published data, we developed the  
15  
16 145 Prehabilitation & Rehabilitation in Oncogeriatrics: Adaptation to Deconditioning risk and  
17  
18 146 Accompaniment of Patients' Trajectories (PROADAPT), a geriatric multi-professional  
19  
20 147 intervention programme. Such a multi-domain intervention should be evaluated according the  
21  
22 148 methodology of complex interventions evaluation (24). Hence, we designed the PROADAPT  
23  
24 149 pilot study to evaluate the feasibility of such a complex intervention. This manuscript describes  
25  
26 150 both PROADAPT multi-domain intervention and PROADAPT pilot study.  
27  
28  
29  
30  
31  
32  
33  
34

## 35 153 **Methods and analysis**

### 36 154 **Objectives**

#### 37 155 *Primary objective*

38 156 The primary objective of the PROADAPT pilot study is to assess the feasibility of the  
39  
40 157 programme, defined as the achievement of at least one item of the programme during patient  
41  
42 158 follow-up.  
43  
44  
45  
46  
47  
48

#### 49 159 50 51 160 *Secondary objectives*

52 161 The secondary objectives of the study are:

- 53 162 1) To assess the achievement of each item of the programme independently of each other  
54  
55 163 (rate of achievement of all or part of the instructions);  
56  
57  
58  
59  
60



- 164 2) To assess patient satisfaction with the programme (Supplementary file 1);
- 165 3) To estimate the rate of compliance to items during the various visits;
- 166 4) To evaluate the functional status and quality of life (QoL) over one year following  
167 surgery (health-related QoL, other dimensions)
- 168 5) To assess post-treatment complications, their rates, and their severity at 30 and 90 days  
169 according to the Clavien-Dindo and National Cancer Institute Common Terminology  
170 Criteria for Adverse Events (NCI-CTCAE) version 4 classification systems (25);
- 171 6) To estimate the post-operative mortality at 30 and 90 days;
- 172 7) To estimate the costs of treatments (health system);
- 173 8) To study the therapeutic strategies (treatment completion rate);
- 174 9) To estimate the progression-free survival (PFS) rate at one year;
- 175 10) To estimate the overall survival (OS) at one year;
- 176 11) To estimate the tolerance of treatments;
- 177 12) To assess the change in geriatric covariates over one year.

178

### 179 **Study design**

180 PROADAPT - pilot study is a prospective, non-comparative multicentre conducted in seven  
181 centres of the Auvergne-Rhône-Alpes region of France.

182

### 183 **Study sites and participants**

184 The study population will include older patients identified during multidisciplinary consultation  
185 meetings and oriented to complex medical-surgical curative procedures in the study centres  
186 (Lyon Sud hospital, Croix Rousse hospital and Edouard Herriot hospital from the Hospices  
187 Civils de Lyon, Nord-Ouest Villefranche-sur-Saône hospital, Annecy-Genevois hospital,  
188 Chambéry hospital, Lyon-Villeurbanne Médipôle).

1  
2  
3 189 Inclusion criteria are: age  $\geq 70$  years, or  $\geq 60$  years with significant comorbidity (Cumulative  
4  
5 190 Illness Rating Scale for Geriatrics (CIRS-G)  $\geq 3$  (26)) or disability (Activities of Daily Living  
6  
7 191 (ADL) score  $< 6/6$  (27)), histologically or cytologically proven cancer, life expectancy  $> 3$   
8  
9 192 months, planned complex medical-surgical procedure with curative intent. Complex medical-  
10  
11 193 surgical procedures are defined as major abdominal surgery (breast excluded), either minimally  
12  
13 194 invasive or open.

14  
15  
16 195 Exclusion criteria are: other malignancy within the previous 5 years (except for adequately  
17  
18 196 treated carcinoma *in situ* of the cervix or squamous carcinoma of the skin, or adequately  
19  
20 197 controlled limited basal cell skin cancer), unable to be regularly followed for any reason  
21  
22 198 (geographic, familial, social, psychological), or with any mental or physical handicap at risk of  
23  
24 199 interfering with the appropriate treatment.

25  
26  
27 200 A screening of older patients will be systematically performed during multidisciplinary  
28  
29 201 meetings and described in the CONSORT flow diagram of the article reporting the study.  
30  
31  
32

33 202

### 34 35 203 **Intervention**

36  
37 204 The PROADAPT intervention programme was developed on a multi-dimensional and  
38  
39 205 multidisciplinary basis. From January 2016 to April 2018, nine regional meetings were  
40  
41 206 organised, gathering 40 representatives of the following medical and paramedical specialties:  
42  
43 207 geriatricians, nutritionists, surgeons (subspecialties: gynaecology, digestive surgery, urology),  
44  
45 208 oncologists, anaesthesiologists, nurses, physiotherapists, occupational therapists, adapted  
46  
47 209 physical activity monitors. A systematic review of published data was conducted in the  
48  
49 210 following axes, to provide a graded state-of-the-art: nutrition, physical activity, patient  
50  
51 211 education, medication rationalisation, cardiovascular optimisation, transition, and  
52  
53 212 standardisation of surgical procedures. Based on the qualitative grading of existing data, a  
54  
55  
56  
57  
58  
59  
60

1  
2  
3 213 modified Delphi method was used to co-validate the content of the standardised intervention  
4  
5 214 checklist, and the feasibility of the implementation of each point of this checklist (Table 1).  
6  
7  
8 215 A PROADAPT booklet was developed; it is a standardised, adapted, and evolutive tool  
9  
10 216 designed to explain physical exercise and nutrition counselling, and to ensure the collection of  
11  
12 217 patients' day-to-day achievements. The first version was tested by candidate patients before the  
13  
14 218 validation of the current (version 3) of the booklet.  
15  
16

17 219

18  
19 220 PROADAPT standardised geriatric intervention programme includes:

20  
21 221 - Pre-operative physical activity, including strength and endurance exercise  $\pm$  group  
22  
23 222 activities over 4  $\pm$  2 weeks. Interventions with a high level of evidence were retained, according  
24  
25 223 to an ongoing umbrella review of systematic reviews (<http://www.crd.york.ac.uk/PROSPERO>  
26  
27 224 [Ref CRD42020100110](http://www.crd.york.ac.uk/PROSPERO); (28,29));

28  
29  
30 225 - Nutrition: nutrition before and after physical activity, pre-postoperative immuno-  
31  
32 226 nutrition  $\pm$  artificial nutrition (*i.e.* enteral or parenteral nutrition) according international  
33  
34 227 guidelines (9);

35  
36  
37 228 - Patient (and caregiver) education and coaching (on nutrition and physical exercise)  
38  
39 229 according to a weekly schedule with the activation of integrated supports (30);

40  
41  
42 230 - Standardised intervention procedures, according to a checklist established in consensus  
43  
44 231 with surgeons;

45  
46 232 - Enhanced rehabilitation will be promoted according to international guidelines (31);

47  
48  
49 233 - Pharmaceutical medication conciliation and treatment optimisation, according to a  
50  
51 234 centralised process with pharmaceutical expertise;

52  
53  
54 235 - Bridging interventions for hospital-to-home transition, according to a proposed  
55  
56 236 standardised procedure including training of dedicated nurses, and post-discharge phone calls  
57  
58 237 follow-up over the 12 weeks after surgery. In practice, only 2 or 3 people from the coordination  
59  
60

1  
2  
3 238 centre team are in charge of coaching for all patients. In the future, a nurse coach will be trained  
4  
5 239 in each centre and will be responsible for patient coaching. Interventions with a high level of  
6  
7 240 evidence were retained, according to an ongoing umbrella review of systematic reviews  
8  
9 241 (<http://www.crd.york.ac.uk/PROSPERO> Ref CRD42017055698).

12 242 The intervention is designed to be implemented at different moments of patient care (Table 1).

14  
15 243

17 244 *During the prehabilitation period:*

19 245 • A dedicated nurse, trained in patient education by the coordinating centre team  
20  
21 246 (“coaching nurse”) presents him/herself to the patient for:

24 247 - Presentation of the programme to the patient and his/her caregiver(s)

26 248 - Personalisation of the PROADAPT booklet (see below) to the patient’s  
27  
28 249 characteristics

30 250 - Collection of personal data, nutritional, and functional habits

33 251 - Geriatric assessment using standardised scores (cognition using the Mini-COG  
34  
35 252 screening tool (32), depression using the geriatric depression scale in 4 and 15 items  
36  
37 253 [GDS4/GDS15] (33), nutrition using the mini-nutritional assessment [MNA] (34))

40 254 - Collection of the information to be sent to the pharmacist: comorbidities,  
41  
42 255 comedications

44 256 - Anticipation and organisation of the future appointments (anaesthetists,  
45  
46 257 stomatherapist, ...)

49 258 - A weekly visit or phone call according to a structured interview for health  
50  
51 259 education and transmission of nutritional and functional advice (see below)

53  
54 260 • Nutritional care is based on:

- 1  
2  
3 261 - A personalised evaluation of nutritional balance and nutritional needs of the  
4  
5 262 patient according to dietician diagnosis based on measured intake and international  
6  
7 263 recommendations  
8  
9  
10 264 - A weekly follow-up of weight and nutritional intake. If the coaching nurse  
11  
12 265 identifies an unfavourable nutritional trend, s/he reports it to the referring physician and  
13  
14 266 nutritionist  
15  
16  
17 267 - Artificial nutrition if needed according European Society for Clinical Nutrition  
18  
19 268 and Metabolism (ESPEN) recommendations (9,35,36)  
20  
21 269 - Pre-operative immunonutrition during 7 days before surgery (36)  
22  
23  
24 270 • Total-body rehabilitation:  
25  
26 271 - 2 to 3 times a week: strength exercise (each time with dedicated exercises for  
27  
28 272 upper and lower limbs, as well as abdominal muscles; 20 to 45 minutes each sequence)  
29  
30 273 - 2 to 3 times a week: endurance exercise (walking or cycle ergometer), 20 to 45  
31  
32 274 minutes each sequence  
33  
34  
35 275 - 3 times a day: respiratory physiotherapy  
36  
37 276 - Once a week (if possible): group activities (according to the centre organisation  
38  
39 277 and home-hospital distance)  
40  
41  
42 278 • Pharmaceutical conciliation and optimisation according to Screening Tool of Older  
43  
44 279 Persons' Prescriptions and Screening Tool to Alert to Right Treatment (STOPP/START)  
45  
46 280 criteria version 2 (37) and international recommendations concerning peri-operative care (7):  
47  
48 281 to be transmitted to the surgical and anaesthesia team without any obligation to change patient  
49  
50 282 care.  
51  
52  
53 283  
54  
55  
56 284 *During peri-operative period*  
57  
58 285 • The coaching nurse contacts the surgical team for transmission of:  
59  
60

- 1  
2  
3 286 o patient's personal data  
4  
5 287 o physical (nutritional, functional, and/or comorbidities) as well as psychological  
6  
7 difficulties  
8 288  
9  
10 289 o results of medication conciliation  
11  
12 290

13  
14  
15 291 *During rehabilitation period*

- 16  
17 292 • The coaching nurse contacts the rehabilitation team for transmission of:  
18  
19 293 o patient's personal data and care course  
20  
21 294 o physical (nutritional, functional, and/or comorbidities) as well as psychological  
22  
23 difficulties  
24 295  
25  
26 296 o results of medication conciliation  
27  
28 297 • The rehabilitation programme is left to the discretion of the rehabilitation team (standard  
29  
30 care and local habits).  
31 298  
32  
33 299 • A weekly phone call from the coaching nurse to the rehabilitation team for nutritional  
34  
35 300 and functional follow-up, as well as medication conciliation  
36  
37  
38 301

39  
40 302 *During hospital-home transition period*

- 41  
42 303 • The coaching nurse contacts the patient's general practitioner for transmission of:  
43  
44 304 o patient's personal data and care course  
45  
46 305 o physical (nutritional, functional, and/or comorbidities) as well as psychological  
47  
48 difficulties  
49 306  
50  
51 307 o results of medication conciliation  
52  
53  
54 308 • Bi-weekly phone call of the coaching nurse to the patient for nutritional and functional  
55  
56 309 follow-up  
57  
58 310 • Advice for optimisation of symptom management: abdominal pain, nausea, vomiting...  
59  
60

1  
2  
3 3114  
5 312 **Participant timeline**6  
7  
8 313 Six successive evaluations are planned for the participants.9  
10 314 *The inclusion visit* is planned during a geriatric consultation planned at least 7 days before the  
11  
12 315 start day of the complex medical-surgical procedure. If the complex medical-surgical procedure  
13  
14 316 is delayed for any reason or the patient receives a neo-adjuvant treatment, the prehabilitation  
15  
16 317 period may be prolonged up to 9 months. In such cases, the frequency of the phone calls is  
17  
18 318 decreased (from 1/week to 1/month) after 4 weeks. During the inclusion visit, lasting about 1  
19  
20 319 hour, the following data are collected:

- 21
- 
- 22
- 
- 23
- 
- 24 320 - Clinical (blood pressure, heart rate, Eastern Cooperative Oncology Group (ECOG)
- 
- 25
- 
- 26 321 score (38), comorbidities), laboratory (albumin, prealbumin, C-reactive protein), and
- 
- 27
- 
- 28 322 paraclinic (year of birth, sex, weight, height, body mass index, change in weight over
- 
- 29
- 
- 30 323 the last 3 and 6 months)
- 
- 31
- 
- 32
- 
- 33 324 - All concomitant treatments and drug conciliation
- 
- 34
- 
- 35 325 - The history of the disease (primitive site, metastases, histology of the initial tumour,
- 
- 36
- 
- 37 326 presence of tumour markers)
- 
- 38
- 
- 39
- 
- 40 327 - Radiological disease assessments (date and nature)
- 
- 41
- 
- 42 328 - Results of a standardised geriatric assessment using validated questionnaires with a
- 
- 43
- 
- 44 329 particular attention on physical activity and nutrition (ADL(27)/instrumental ADL
- 
- 45
- 
- 46 330 (IADL) (39), G8 (40), Rapid Assessment of Physical Activity (RAPA) (41), daily
- 
- 47
- 
- 48 331 physical instrumental activities (AIPVQ) (42), European Organization for the Research
- 
- 49
- 
- 50 332 and Treatment of Cancer Quality of Life Questionnaire (EORTC QLQ-C30) (43) and
- 
- 51
- 
- 52 333 Elderly specific questionnaire in 14 items, (QLQ-ELD14) (44), the EUROQOL EQ-5D-
- 
- 53
- 
- 54 334 3L evaluating five dimensions: mobility, self-care, usual activities, pain/discomfort and
- 
- 55
- 
- 56 335 anxiety/depression in three levels (45), fatigue short form inventory (SF-36) (46), Short
- 
- 57
- 
- 58
- 
- 59
- 
- 60

1  
2  
3 336 physical performance battery (SPPB) (47), Timed up and go (TUG) test (48), 9-item  
4  
5 337 Fatigue Severity Scale (FSS) (49), MNA (34), GDS4/GDS15 (33), Mini-COG (32),  
6  
7 338 Tinetti test (50), Borg scale (51), Pain scale (52), Nutrition scale (53)) (**Error!**  
9  
10 339 **Reference source not found.**Tables 2 and 3).

11  
12 340 - Delivery of the “PROADAPT kit” during a meeting with a dedicated paramedic (nurse,  
13  
14 341 physiotherapist, ergotherapist...) to:

15  
16  
17 342 ○ Provide to the patient Voldyne® (Hudson RCI, Temecula, CA, USA) and Triflo  
18  
19 343 II® (Tyco Healthcare, Mansfield, MA, USA) incentive spirometry devices for  
20  
21 344 inspiratory muscle training

22  
23  
24 345 ○ Present the PROADAPT booklet that includes a battery of exercises and  
25  
26 346 nutritional counselling specifically designed for this older population:

27  
28 347 ■ muscle strengthening of the upper limbs (6 exercises, 3 difficulty levels),  
29  
30 348 lower limbs (6 exercises, 3 difficulty levels), abdominal wall (4  
31  
32 349 exercises, 3 difficulty levels); objective: 2 to 3 sessions per day for a total  
33  
34 350 duration of between 20 and 45 minutes

35  
36  
37 351 ■ endurance/aerobic activities (7 exercises, 3 difficulty levels with 3  
38  
39 352 duration objectives); objective: every day

40  
41  
42 353 ■ inspiratory muscle training with Voldyne® and Triflo II® devices;  
43  
44 354 objective: 3 sessions per day for a total duration of 30 minutes

45  
46  
47 355 ■ general nutritional counselling adapted to the older population: food  
48  
49 356 enrichment, inter-meal collations, oral nutritional supplements.

50  
51 357 ○ Fulfil a 3-day food statement that allows, in the 7 days after inclusion, to deliver  
52  
53 358 a dietician-driven personalised nutritional counselling. If needed, in case of  
54  
55 359 unfavourable nutritional parameters, artificial nutrition is introduced.

56  
57  
58 360 - Prescription, if needed:  
59  
60



- 1  
2  
3 361           ○ of home physiotherapy according to the PROADAPT programme for respiratory  
4  
5 362           training sessions and physical activity training sessions  
6  
7  
8 363           ○ of oral nutritional supplements  
9  
10 364           ○ of usual medicines, adapted following pharmaceutical review  
11  
12 365       - For patients requiring inpatient follow-up, hospital admission for a few days in a  
13  
14 366           rehabilitation unit for a physiotherapeutic programme and/or artificial nutrition (enteral  
15  
16  
17 367           preferred).

18  
19 368       During the pre-intervention period, phone calls by a dedicated paramedic are planned (once a  
20  
21 369       week for the first 4 weeks and then once a month until the intervention). Calls are semi-directed  
22  
23 370       interviews focused on the patient's autonomy, physical activity, appetite, and sleep over the last  
24  
25 371       period (week/month). A special attention is paid to encouraging patient motivation and  
26  
27 372       compliance to the programme.

28  
29  
30 373       *The pre-therapeutic visit* is scheduled when possible within the 5 days before the day of the  
31  
32 374       intervention. This visit is performed in the surgery or radiotherapy unit only if the visit is  
33  
34 375       necessary before the intervention and does not modify standard therapeutic care; it collects:

- 35  
36  
37 376       - Clinical, laboratory, and paraclinic data  
38  
39 377       - All concomitant treatments and drug conciliation  
40  
41 378       - Data concerning pain, nutrition, fitness, and physical tests (Table 2 and 3)

42  
43  
44 379       During the post-intervention period, paramedics trained in clinical research will resume follow-  
45  
46 380       up phone calls as before the intervention once a week for 12 weeks after day 0 (D0), and once  
47  
48 381       a month up to 12 months after D0. D0 is defined as the last day of surgery (day of the last  
49  
50 382       resumption of surgery in the limit of 30 days after the first intervention) or the last day of  
51  
52 383       radiotherapy. For weekly calls, a margin of  $\pm 2$  days is allowed, and for monthly calls a margin  
53  
54 384       of  $\pm 7$  days is allowed.  
55  
56  
57  
58  
59  
60

1  
2  
3 385 *Visits at 1, 3, and 6 months after the intervention (± 7 days):* The patient may have started an  
4  
5 386 antineoplastic treatment according to standard of care. The visit could be with the surgeon, the  
6  
7 387 radiotherapist, or the oncologist according local habits. The data to be collected are:

- 8  
9  
10 388 - Clinical (blood pressure, heart rate, ECOG scale (38)), laboratory (albumin, prealbumin,  
11  
12 389 C-reactive protein), and patient characteristics (weight, body mass index)  
13  
14 390 - All concomitant treatments and drug conciliation  
15  
16  
17 391 - Patient care (surgery and complications, treatment for the cancer)  
18  
19 392 - Radiological disease assessments (date and nature)  
20  
21  
22 393 - Quality of life, pain, nutrition, fitness, physical performance through questionnaires and  
23  
24 394 tests regarding (Table 2 and 3)  
25  
26 395 - Hospital costs related to complications

27  
28 396 *The end of study visit* is planned at 12 months (per-protocol) or at the date of trial premature  
29  
30 397 discontinuation (± 7 days) for the collection of the data listed above. In addition, and in case of  
31  
32 398 omission of one or more of the intermediate visits, data relating to complications occurring  
33  
34 399 during the post-therapeutic period are collected.  
35  
36

37  
38 400

## 40 401 **Outcomes and measurements**

### 41 42 402 *Primary outcome*

43  
44 403 The main outcome measure will be the proportion of patients who have completed at least one  
45  
46 404 item in the PROADAPT programme after 12 months after D0. The workshops of the  
47  
48 405 programme are:

- 49  
50  
51 406 - Physical and respiratory rehabilitation  
52  
53 407 - Re-nutrition session  
54  
55 408 - Telephone nurse follow-up  
56  
57

58 409  
59  
60

1  
2  
3 410 ***Secondary outcomes***  
4

5 411 The secondary outcomes of the study are:

6  
7 412 - The feasibility of each stage of the programme independently of each other (rate of  
8  
9 413 achievement of all or part of the instructions)

10  
11  
12 414 ○ Pre-operative physical rehabilitation including (Figure 1):

13  
14  
15 415 ● Muscle strengthening

16  
17 416 ● Respiratory rehabilitation

18  
19 417 ● Endurance work

20  
21  
22 418 ○ Pre-operative nutrition counselling (Figure 1)

23  
24 419 ○ Drug reconciliation / iatrogenic prevention

25  
26 420 ○ Pre-therapeutic follow-up calls

27  
28 421 ○ Post-surgery or post-radiotherapy follow-up calls  
29  
30  
31 422

32  
33 423 - Patient satisfaction with the overall programme at the end of the study (end of follow-up or  
34  
35 424 study discontinuation) estimated using a questionnaire (Supplementary file 1).

36  
37 425 - To assess the change over time before surgery of: physical parameters and exercises,  
38  
39 426 inspiratory parameters and exercises (Voldyne<sup>®</sup>, Triflo<sup>®</sup>), as well as weight and food intake  
40  
41 427 (qualitative and quantitative assessments).  
42  
43

44  
45 428 - To assess the change over 1 year of:

46  
47 429 ○ physical performance (SPPB, gate speed, TUG test) and functional independence on  
48  
49 430 ADL (27), IADL (39), AIPVQ (42)

50  
51 431 ○ nutritional parameters of the patient (weight, albuminemia, appetite)

52  
53 432 ○ health-related QoL for patients based on QLQ-C30 and ELD14 (5 dimensions: mobility,  
54  
55 433 disease burden, emotional and physical functioning, tiredness) (54,55)

56  
57 434 ○ pharmaceutical conciliation  
58  
59  
60

- 1  
2  
3 435 - Estimate the rate and nature of post-operative complications at 30 days (NCI-CTCAE)  
4  
5 436 - Estimate the rate and nature of post-operative complications according to the CCI at 30 and  
6  
7 437 90 days  
8  
9 438 - Estimate post-operative mortality at 30 and 90 days  
10  
11 439 - Estimate the one-year overall survival (OS) rate  
12  
13 440 - Estimate the one-year progression-free survival (PFS) rate  
14  
15 441 - Estimate the longitudinal change of QoL according to QLQ C30, ELD14, and EQ-5D  
16  
17 442 - Estimate treatment costs (health system)  
18  
19 443 - Study therapeutic strategies (treatment completion rate)  
20  
21 444 - Estimate the change of geriatric covariates over 1 year.  
22  
23  
24  
25  
26  
27

#### 28 446 **Sample size calculation**

29  
30 447 The programme will be considered feasible, at the patient level, if all or part of the programme  
31  
32 448 is implemented in at least 50% of the included patients (= alternative hypothesis). This threshold  
33  
34 449 was defined in line with previous studies on prehabilitation for older cancer patients, that  
35  
36 450 reported compliance rates between 16 and 95% (56,57). Considering that the PROADAPT  
37  
38 451 programme is complex even if tailored to older patients, we anticipate modest compliance rates.  
39  
40 452 To reject the null hypothesis of programme feasibility in less than 35% of patients, with an  
41  
42 453 alpha risk of 5% and a power of 90% (beta=10%, bilateral test), the number of subjects required  
43  
44 454 is 111; accounting for 10% non-treatable patients, a total of 122 patients should be included.  
45  
46 455 The included patients will be analysed according to the intention-to-treat principle.  
47  
48  
49  
50

51 456

#### 52 53 457 **Data management and statistical analyses**

1  
2  
3 458 Data are monitored by a clinical research assistant (CRA). Inconsistencies will be reported to  
4  
5 459 the study investigators in order to decide whether the data should be corrected or considered as  
6  
7 460 missing. Any changes in the data will be reported.  
8  
9

10 461 Data analyses will be performed by the data management and analysis centre. The analyses will  
11  
12 462 be carried out by an independent statistician with the latest version of the R software  
13  
14 463 environment (R Core Team. R: A language and environment for statistical computing. R  
15  
16 464 Foundation for Statistical Computing, Vienna, Austria. URL <https://www.R-project.org/>). All  
17  
18 465 of the characteristics collected will be subjected to a descriptive analysis.  
19  
20  
21 466

### 22 23 24 467 ***Descriptive analyses***

25  
26 468 A flow diagram will describe the data available for the patient population at baseline, and during  
27  
28 469 each follow-up visit. Eligibility criteria for treated patients will be verified, as well as follow-  
29  
30 470 up and end of study visits. Reasons for premature end of study will be provided.  
31  
32

33 471 Characteristics of the study population, numbers and proportions of missing values will be  
34  
35 472 reported. Patient characteristics will be described using mean and standard deviation or median  
36  
37 473 and interquartile range for quantitative variables, and frequencies and distribution for  
38  
39 474 categorical variables. A comparison of baseline characteristics between patients with complete  
40  
41 475 follow-up and those with attrition will be performed. If needed, methods for handling missing  
42  
43 476 data (multiple imputation, mixed model, or auxiliary variable) will be used when appropriate.  
44  
45  
46  
47 477

### 48 49 478 ***Primary analysis***

50  
51 479 The proportion of patients who have completed at least one PROADAPT programme activity  
52  
53 480 12 months after the start of treatment will be estimated using mean and standard deviation.  
54  
55

### 56 481 ***Secondary analyses***

57  
58 482  
59  
60

1  
2  
3 483 **Time-to-event variables: follow-up, overall survival, progression-free survival**

4  
5 484 The probabilities of events at specific measurement times will be estimated according to the  
6  
7  
8 485 Kaplan-Meier method. Medians of event-free survival will be reported by treatment arm with  
9  
10 486 its 95 % confidence interval [95% CI], if the number of events allows estimation of the median.  
11  
12 487 OS and PFS probabilities at 12 months (after the day of the last revision of surgery or the last  
13  
14 488 day of radiotherapy) will be provided with 95% CI.

15  
16  
17 489

18  
19 490 **Quality of life**

20  
21 491 Analyses of the QoL data will be performed according to the modified intention-to-treat (mITT)  
22  
23 492 principle: all included patients, regardless of compliance with the eligibility criteria and whether  
24  
25 493 or not they were followed-up, and for whom the QoL scores are available at inclusion will be  
26  
27 494 included in the analysis. Patient QoL, linked to health, will be analysed after 3 months through  
28  
29 495 5 dimensions: mobility, disease burden, emotional and physical functioning, and fatigue.

30  
31  
32 496

33  
34  
35 497 ***Data monitoring***

36  
37 498 The successful completion of the database is ensured by the hospital CRA. The hospital CRA  
38  
39 499 also ensures compliance with the study protocol. The sponsor CRA verifies that the rights of  
40  
41 500 the participants are respected.

42  
43  
44 501

45  
46  
47 502 ***End of study***

48  
49 503 Patients leave the study either on a per-protocol basis during the “end of study visit” on month  
50  
51 504 12 after the intervention or at any time during the conduct of the study if they no longer wish  
52  
53 505 to participate. However, as indicated in the information letter to the patients/caregivers, the data  
54  
55 506 collected before exclusion may be used as part of the study.

56  
57  
58 507

59  
60

1  
2  
3 508 ***Confidentiality***  
4

5 509 Correspondence tables will be kept in a separate file that does not contain clinical data. The  
6  
7  
8 510 access to the nominative information is protected by a password and confidentiality is  
9  
10 511 guaranteed by the study.  
11

12 512

13  
14 513 ***Protocol amendments***  
15

16  
17 514 Any important modification requiring a new ethics committee approval will be communicated  
18  
19 515 in future publications. Any potential impact of protocol modifications on the results will be  
20  
21 516 discussed as appropriate.  
22

23  
24 517

25  
26 518 ***Trial status***  
27

28 519 Patient enrolment began on 3 July 2018. Data are currently being collected.  
29

30  
31 520

32  
33 521 ***Patient and public involvement***  
34

35 522 Patients were involved at different steps of the trial: during the development of the PROADAPT  
36  
37 523 booklet, several (n=30) patients were asked to answer an anonymous questionnaire in order to  
38  
39 524 improve its ergonomics; the information letter and consent form for the study were reviewed  
40  
41 525 by the patients committee of the *Ligue Nationale de Lutte contre le Cancer* (a French  
42  
43 526 association of cancer patients).  
44  
45

46  
47 527

48  
49 528 **Discussion**  
50

51 529 **Discussion of the intervention**  
52

53 530 Prehabilitation has long been conceptualised as an effective means of improving the functional  
54  
55 531 capacity of the individual to enable them to resist various stressors. Originally developed in the  
56  
57 532 military as the association of physical training to improve strength and endurance, improvement  
58  
59  
60

1  
2  
3 533 of nutritional intake, and general education (58), it has been transposed into medicine and major  
4  
5 534 surgery – initially when an ICU admission is planned – at the beginning of the century (59).  
6  
7 535 Despite a growing interest in the medical community for prehabilitation, and particularly cancer  
8  
9 536 prehabilitation, the level of evidence for specific interventions remains too low for it to be  
10  
11 537 implemented in everyday practice. Among the main limitations include the heterogeneity of  
12  
13 538 programmes, sometimes poor patient compliance, and the fact that most studies were small pilot  
14  
15 539 studies developed for patients fitter and younger than those who are likely to benefit the most  
16  
17 540 from prehabilitation. Another point to emphasise is that most programmes include only one  
18  
19 541 intervention – physical, nutritional, or psychological rehabilitation – while multimodal  
20  
21 542 interventions are often considered to be more effective in older populations.  
22  
23 543 Considering these points, the PROADAPT intervention was developed according to an  
24  
25 544 innovative management strategy since it started in 2016 by multi-professional meetings  
26  
27 545 conceived as brainstorming sessions in order to develop a multidisciplinary programme  
28  
29 546 dedicated to prehabilitation and follow-up of older patients. The multidisciplinary conception  
30  
31 547 of the intervention, the particular attention paid to older patients’ specificities and the previous  
32  
33 548 experience of the participants in various fields, including patient education, cognition, and  
34  
35 549 physiotherapy, are hopefully the warrants of the most tailored approach to the target population.  
36  
37 550 For example, a large font was used in the booklet and the illustrations highly schematic and  
38  
39 551 highly contrasted, and, furthermore, each sentence was verified by a panel of patients in order  
40  
41 552 to ensure correct understanding. This resulted in high rate of satisfaction regarding the booklet  
42  
43 553 that was evaluated by 30 patients (unpublished data).  
44  
45 554 This pilot study is the first step towards an ambitious programme, since the PROADAPT  
46  
47 555 programme will be evaluated in the future in two randomized studies, PROADAPT-  
48  
49 556 ovary/EWOC-2 (NCT04284969) and PROADAPT sus-mesocolic, designed to evaluate the  
50  
51 557 impact of the PROADAPT programme on post-treatment complications versus usual practice.  
52  
53  
54  
55  
56  
57  
58  
59  
60



1  
2  
3 558 In order to favour patient compliance and follow-up, an eHealth tool, ID-PROADAPT®, has  
4  
5 559 been developed that will help supervise the course of patients' care.  
6

### 7 560 **Discussion of the study design**

8  
9  
10 561 In line with the previous points, this pilot study was designed to answer the critical question: is  
11  
12 562 a multidomain prehabilitation programme feasible in an older cancer population? This question  
13  
14 563 encompasses several points: Is the programme physically adapted to an older population? Is  
15  
16 564 such a program applicable in ambulatory care? How to build pedagogical tools adapted for such  
17  
18 565 ambulatory use? Are such pedagogical tools understandable? What is the compliance of the  
19  
20 566 patients to each domain of the intervention programme?... Another point is to understand is  
21  
22 567 whether the patient's care team accepts such intervention; however, this point was previously  
23  
24 568 evaluated by Ghignone *et al.* who demonstrated through an international survey that surgeons  
25  
26 569 are generally in favour for such programmes since 71% of them would accept to prehabilitate  
27  
28 570 their elderly patients four weeks before surgery, if such intervention is proven to be effective  
29  
30 571 (60). Nevertheless, the participation of surgeons and anaesthetists during initial brainstorming  
31  
32 572 sessions was of major interest since they greatly enriched the structure of the programme.  
33  
34 573 Thus, the construct of this trial may appear as highly complex with overabundant secondary  
35  
36 574 endpoints, but this design encompasses as much as possible the complexity of preventive care  
37  
38 575 in an older population, which has to mix adaptation to the target population and the ability to  
39  
40 576 maintain compliance over time.  
41  
42  
43  
44  
45  
46  
47  
48

### 49 578 **Ethics and dissemination**

50  
51 579 The study sponsor is the Hospices Civils de Lyon, responsible for study insurance and  
52  
53 580 pharmacovigilance. The study protocol (V2) was approved by the Ile de France 8 ethics  
54  
55 581 committee on 5 June 2018 and cover all sites involved in this study. The amended versions  
56  
57 582 were as follows: V3 dated 23 October 2018 (change in the recruitment period, addition of new  
58  
59  
60

1  
2  
3 583 investigation centres), V4 dated 17 May 2019 (request for an additional 12 months extension,  
4  
5 584 update with the General Data Protection Regulations (GPDR) and update of the patient  
6  
7 585 booklet), V5 dated 17 July 2020 (addition of a cohort of 30 patients to test the follow-up  
8  
9 586 programme with the ID-PROADAPT® eHealth tool, Supplementary file 2, request for an  
10  
11 587 additional 8 months extension). The current version is the V5 dated 17 July 2020, authorised  
12  
13 588 on 10 September 2020. The research will be carried out in accordance with the Helsinki  
14  
15 589 Declaration and ICH GCP (International Conference on Harmonisation-Good Clinical Practice)  
16  
17 590 Guidelines. The trial protocol fulfils the SPIRIT 2013 checklist (Supplementary table 1) and  
18  
19 591 World Health Organization trial registration data set (Supplementary table 2). The study  
20  
21 592 complies with the principles of the data protection act in France and with the GPRD in force in  
22  
23 593 Europe. Each investigator must collect a written informed consent at the beginning of the  
24  
25 594 procedure. This consent is retained in the patient's medical chart. The patient can stop  
26  
27 595 participation in the study at any time with an oral instruction given to the investigator or CRA.  
28  
29 596 Patients will be informed of additional amendments according to the law in force.  
30  
31 597 The results of the primary and secondary objectives will be published in peer-reviewed journals.  
32  
33 598 All authors of future publications will have to meet the criteria for authorship stated in the  
34  
35 599 Uniform Requirements for Manuscripts Submitted to Biomedical Journals by the International  
36  
37 600 Committee of Medical Journal Editors.  
38  
39  
40  
41  
42  
43  
44  
45  
46  
47  
48  
49  
50  
51  
52  
53  
54  
55  
56  
57  
58  
59  
60

601

602 Total words count: 4771

603

#### 604 **Abbreviations**

605 ADL: Activities of Daily Living; AIPVQ: Physical Instrumental activities of daily living (in  
606 French: Activités Instrumentales Physiques de la Vie Quotidienne); CRA: Clinical Research  
607 Assistant; EORTC: European organisation for research and treatment of cancer; ESPEN:

1  
2  
3 608 European Society for Clinical Nutrition and Metabolism; FSS: Fatigue Severity Scale; GDS:  
4  
5 609 Geriatric Depression Scale; IADL: Instrumental Activities of Daily Living; ICU: Intensive Care  
6  
7  
8 610 Unit; mITT: Modified Intention To Treat; MNA: Mini Nutritional Assessment; QLQ-C30:  
9  
10 611 quality of life questionnaire core 30 of the EORTC; QLQ-ELD14: Older patients- specific  
11  
12 612 quality of life questionnaire in 14 items of the EORTC; RAPA: Rapid Assessment of Physical  
13  
14 613 Activity; SF-36: short form 36 health survey questionnaire; SPPB: Short Physical Performance  
15  
16  
17 614 Battery  
18  
19 615

21 616 **Declarations**

24 617

26 618 **Acknowledgements**

28 619 This pilot protocol is part of the PROADAPT working group initiative for improving care for  
29  
30 620 older people with cancer.

33 621 *PROADAPT working group*

35 622 Coordinator: C. Falandry; physicians: G. Albrand, D. Barnoud, D. Benayoun, B. Billod, J.  
36  
37 623 Bonhomme, A.-L. Bres, C. Brunengo, E. Castel-Kremer, A. Chanelière, Y. Chauleur, V.  
38  
39 624 Collange, G. Copaescu, H. Curé, A.-M. Dascalita, B. De La Vigerie, S. Ducoulombier, O.  
40  
41  
42 625 Ganne, F. Gervais, T. Gilbert, M. Giroud, R. Guyot, H. Habchi, M. Haïne, N. Jomard, O. Le  
43  
44 626 Saux, C. Lecardonnel, B. Leroy, J.-A. Long, A. Marion, I. Morel-Soldner, E. Nony, S. Parent,  
45  
46  
47 627 A. Pelisset-Vanhersecke, A. Pirollet, L. Stefani, J.-E. Terrier, J. Trautmann, M.-A. Vincent ;  
48  
49 628 pharmacists: D. Charlety; statisticians: S. Paget-Bailly, B. Riche; paramedics: C. Barbarava, C.  
50  
51 629 Bourgeois, M. Granger, A. Laurent, M. Tomatis; clinical research teams: D. Dayde, C. El  
52  
53 630 Khoury, B. Galamand, E. Genest, C. Garandeau, E. Gadéa-Deschamps, S. Goutte, A. Malapert,  
54  
55  
56 631 V. Pitiot, M. Roche.

1  
2  
3 632 The authors also acknowledge the teams of Lyon Sud Hospital, Edouard Herriot Hospital of  
4  
5 633 Lyon, Croix Rousse Hospital of Lyon, Annecy Genevois Hospital Center, Hôpital Nord Ouest  
6  
7 634 hospital center, Chambéry Hospital Center and Médipôle Lyon-Villeurbanne who contribute to  
8  
9  
10 635 patient enrolment in this study. They also thank Philip Robinson (DRCI, Hospices Civils de  
11  
12 636 Lyon) for help in manuscript preparation.

13  
14 637 The authors would like to thank the patients' review committee of the Ligue Nationale de Lutte  
15  
16 638 contre le Cancer for the valuable editing of the information note and the consent form.

17  
18  
19 639

### 20 21 640 **Funding**

22  
23 641 This work was supported by the Agence Régionale de Santé (ARS) Auvergne Rhône Alpes,  
24  
25 642 through the call for projects "Innovate in health for the Auvergne Rhône Alpes region" jointly  
26  
27 643 organized by the ARS, Bpifrance, the Auvergne Rhône Alpes region, URIOPASS, ORAIDA  
28  
29 644 and Cluster I-care and the decision of the selection committee on June 27, 2016 (Grant N°2016-  
30  
31 645 149 (63)). It provided funding for nurses, dieticians, physiotherapists, and clinical research  
32  
33 646 assistants.

34  
35  
36 647

### 37 38 648 **Availability of data and materials**

39  
40 649 The final dataset of the PROADAPT pilot study will be available on reasonable request after  
41  
42 650 publication of the primary objective. Data requests can be submitted to the corresponding  
43  
44 651 author.

45  
46  
47 652

### 48 49 653 **Competing interest**

50  
51 654 The authors declare that they have no competing interests.

52  
53  
54 655

### 55 56 656 **Consent for publication**

1  
2  
3 657 Not applicable  
4

5 658  
6

7  
8 659 **Author contributions**  
9

10 660 All authors participated to the PROADAPT intervention conception. Study protocol was  
11  
12 661 conceived by DD, CF, CG, SPB, OLS, AM, VP and CR. DD and CF assumed fundraising and  
13  
14 662 grant follow-up. MR led the drafting of the manuscript. All authors (MR, CR, AM, SPB, CG,  
15  
16 663 VP, MT, BR, BG, MG, CBa, CBo, EG, LS, MH, ECK, IMS, VC, OLS, DD and CF) critically  
17  
18  
19 664 reviewed and approved the final version of the protocol.  
20

21 665  
22  
23  
24  
25  
26  
27  
28  
29  
30  
31  
32  
33  
34  
35  
36  
37  
38  
39  
40  
41  
42  
43  
44  
45  
46  
47  
48  
49  
50  
51  
52  
53  
54  
55  
56  
57  
58  
59  
60

peer review only

666 **References**

- 667 1. Wagner D. Role of frailty and sarcopenia in predicting outcomes among patients  
668 undergoing gastrointestinal surgery. *World J Gastrointest Surg.* 2016;8(1):27.
- 669 2. Heppenstall CP, Wilkinson TJ, Hanger HC, Keeling S. Frailty: dominos or deliberation?  
670 *N Z Med J.* 2009 Jul 24;122(1299):42–53.
- 671 3. Lopez-Lopez V, Gómez-Ruiz AJ, Eshmuminov D, Cascales-Campos PA, Alconchel F,  
672 Arevalo-Perez J, et al. Surgical oncology in patients aged 80 years and older is  
673 associated with increased postoperative morbidity and mortality: A systematic review  
674 and meta-analysis of literature over 25 years. *Surg Oncol.* 2020 Jun;33:81–95.
- 675 4. Tan H-J, Saliba D, Kwan L, Moore AA, Litwin MS. Burden of Geriatric Events Among  
676 Older Adults Undergoing Major Cancer Surgery. *J Clin Oncol.* 2016 Oct 4;34(11):1231–  
677 8.
- 678 5. Akushevich I, Kravchenko J, Akushevich L, Ukraintseva S, Arbeev K, Yashin AI, et al.  
679 Medical Cost Trajectories and Onsets of Cancer and NonCancer Diseases in US Elderly  
680 Population, Medical Cost Trajectories and Onsets of Cancer and NonCancer Diseases in  
681 US Elderly Population. *Comput Math Methods Med Comput Math Methods Med.* 2011  
682 Jun 1;2011, 2011:e857892.
- 683 6. De Roo AC, Li Y, Abrahamse PH, Regenbogen SE, Suwanabol PA. Long-term  
684 Functional Decline After High-Risk Elective Colorectal Surgery in Older Adults. *Dis*  
685 *Colon Rectum.* 2020 Jan;63(1):75–83.
- 686 7. Mohanty S, Rosenthal RA, Russell MM, Neuman MD, Ko CY, Esnaola NF. Optimal  
687 Perioperative Management of the Geriatric Patient: A Best Practices Guideline from the  
688 American College of Surgeons NSQIP and the American Geriatrics Society. *J Am Coll*  
689 *Surg.* 2016 May 1;222(5):930–47.
- 690 8. Treanor C, Kyaw T, Donnelly M. An international review and meta-analysis of  
691 prehabilitation compared to usual care for cancer patients. *J Cancer Surviv Res Pract.*  
692 2018 Feb;12(1):64–73.
- 693 9. Arends J, Bachmann P, Baracos V, Barthelemy N, Bertz H, Bozzetti F, et al. ESPEN  
694 guidelines on nutrition in cancer patients. *Clin Nutr [Internet].* 2016 Aug 6 [cited 2016  
695 Nov 20];0(0). Available from: [http://www.clinicalnutritionjournal.com/article/S0261-  
696 5614\(16\)30181-9/abstract](http://www.clinicalnutritionjournal.com/article/S0261-5614(16)30181-9/abstract)
- 697 10. Singh F, Newton RU, Galvão DA, Spry N, Baker MK. A systematic review of pre-  
698 surgical exercise intervention studies with cancer patients. *Surg Oncol.* 2013 Jun  
699 1;22(2):92–104.
- 700 11. Powell R, Scott NW, Manyande A, Bruce J, Vögele C, Byrne-Davis LM, et al.  
701 Psychological preparation and postoperative outcomes for adults undergoing surgery  
702 under general anaesthesia. *Cochrane Anaesthesia, Critical and Emergency Care Group,*  
703 *editor. Cochrane Database Syst Rev [Internet].* 2016 May 26 [cited 2021 Feb 8];  
704 Available from: <http://doi.wiley.com/10.1002/14651858.CD008646.pub2>

- 1  
2  
3 705 12. Santa Mina D, Alibhai SMH. Prehabilitation in geriatric oncology. *J Geriatr Oncol*. 2020  
4 706 May 1;11(4):731–4.  
5  
6 707 13. Carli F, Bousquet-Dion G, Fiore JF. Prehabilitation vs Postoperative Rehabilitation for  
7 708 Frail Patients. *JAMA Surg*. 2020 Sep 1;155(9):899–900.  
9  
10 709 14. Ellis G, Whitehead MA, O’Neill D, Langhorne P, Robinson D. Comprehensive geriatric  
11 710 assessment for older adults admitted to hospital. *Cochrane Database Syst Rev*.  
12 711 2011;7:CD006211.  
13  
14 712 15. Ellis G, Gardner M, Tsiachristas A, Langhorne P, Burke O, Harwood RH, et al.  
15 713 Comprehensive geriatric assessment for older adults admitted to hospital. *Cochrane*  
16 714 *Database Syst Rev*. 2017 12;9:CD006211.  
17  
18 715 16. Meid AD, Lampert A, Burnett A, Seidling HM, Haefeli WE. The impact of  
19 716 pharmaceutical care interventions for medication underuse in older people: a systematic  
20 717 review and meta-analysis. *Br J Clin Pharmacol*. 2015;80(4):768–76.  
22  
23 718 17. Royal S, Smeaton L, Avery AJ, Hurwitz B, Sheikh A. Interventions in primary care to  
24 719 reduce medication related adverse events and hospital admissions: systematic review and  
25 720 meta-analysis. *Qual Saf Health Care*. 2006 Feb;15(1):23–31.  
27  
28 721 18. Rennke S, Nguyen OK, Shoeb MH, Magan Y, Wachter RM, Ranji SR. Hospital-initiated  
29 722 transitional care interventions as a patient safety strategy: a systematic review. *Ann*  
30 723 *Intern Med*. 2013 Mar 5;158(5 Pt 2):433–40.  
31  
32 724 19. Ferlay J, Soerjomataram I, Ervik M, Dikshit R, Eser S, Mathers C, et al. GLOBOCAN  
33 725 2012 v1.0, Cancer Incidence and Mortality Worldwide: IARC CancerBase No. 11  
34 726 [Internet] [Internet]. Lyon, France: International Agency for Research on Cancer; 2013  
35 727 [cited 2016 Sep 4]. Available from: Available from: <http://globocan.iarc.fr>  
36  
37 728 20. Koene RJ, Prizment AE, Blaes A, Konety SH. Shared Risk Factors in Cardiovascular  
38 729 Disease and Cancer. *Circulation*. 2016 Mar 15;133(11):1104–14.  
40  
41 730 21. Sjölund B-M, Wimo A, Qiu C, Engström M, von Strauss E. Time trends in prevalence of  
42 731 activities of daily living (ADL) disability and survival: Comparing two populations  
43 732 (aged 78+ years) living in a rural area in Sweden. *Arch Gerontol Geriatr*. 2014  
44 733 May;58(3):370–5.  
45  
46 734 22. Sjölund B-M, Wimo A, Engström M, Strauss E von. Incidence of ADL Disability in  
47 735 Older Persons, Physical Activities as a Protective Factor and the Need for Informal and  
48 736 Formal Care – Results from the SNAC-N Project. *PLoS ONE* [Internet]. 2015 [cited  
49 737 2016 Sep 4];10(9). Available from: [https://www.ncbi.nlm.nih-](https://www.ncbi.nlm.nih.gov/gate2.inist.fr/pmc/articles/PMC4583409/)  
50 738 [gov.gate2.inist.fr/pmc/articles/PMC4583409/](https://www.ncbi.nlm.nih.gov/gate2.inist.fr/pmc/articles/PMC4583409/)  
51  
52  
53 739 23. Jagger C, Gillies C, Moscone F, Cambois E, Van Oyen H, Nusselder W, et al.  
54 740 Inequalities in healthy life years in the 25 countries of the European Union in 2005: a  
55 741 cross-national meta-regression analysis. *The Lancet*. 2008 Dec 20;372(9656):2124–31.  
57  
58 742 24. Craig P, Dieppe P, Macintyre S, Michie S, Nazareth I, Petticrew M. Developing and  
59 743 evaluating complex interventions: the new Medical Research Council guidance. *BMJ*.  
60 744 2008 Sep 29;337:a1655.

- 1  
2  
3 745 25. Website: [http://www.cepd.fr/CUSTOM/CEPD\\_toxicite.pdf](http://www.cepd.fr/CUSTOM/CEPD_toxicite.pdf).  
4  
5 746 26. Linn BS, Linn MW, Gurel L. CUMULATIVE ILLNESS RATING SCALE. *J Am*  
6 747 *Geriatr Soc.* 1968 May;16(5):622–6.  
7  
8 748 27. Katz S, Ford AB, Moskowitz RW, Jackson BA, Jaffe MW. Studies of Illness in the  
9 749 Aged. The Index of Adl: A Standardized Measure of Biological and Psychosocial  
10 750 Function. *Jama.* 1963 Sep 21;185:914–9.  
11  
12  
13 751 28. Falandry C, Stefani L, Granger M, Momiron C, Habchi H, Bourgeois C, et al.  
14 752 Interventions to improve physical performances of older people with cancer before  
15 753 major surgery: an umbrella review. *J Geriatr Oncol.* 2018;9(6 suppl 1):S94–5.  
16  
17 754 29. Falandry C, Stefani L, Andre L, Granger M, Barbavara C, Habchi H, et al. Interventions  
18 755 to improve physical performances of older people with cancer before complex medico-  
19 756 surgical procedures: Protocol for an umbrella review of systematic reviews and meta-  
20 757 analyses. *Medicine (Baltimore).* 2020 Sep 25;99(39):e21780.  
21  
22  
23 758 30. Glasgow RE, Emmons KM. How Can We Increase Translation of Research into  
24 759 Practice? Types of Evidence Needed. *Annu Rev Public Health.* 2007;28(1):413–33.  
25  
26 760 31. Colburn JL, Mohanty S, Burton JR. Surgical Guidelines for Perioperative Management  
27 761 of Older Adults: What Geriatricians Need to Know. *J Am Geriatr Soc.* 2017 Jun  
28 762 1;65(6):1339–46.  
29  
30  
31 763 32. McCarten JR, Anderson P, Kuskowski MA, McPherson SE, Borson S. Screening for  
32 764 Cognitive Impairment in an Elderly Veteran Population: Acceptability and Results  
33 765 Using Different Versions of the Mini-Cog: SCREENING ELDERLY VETERANS  
34 766 USING THE MINI-COG. *J Am Geriatr Soc.* 2011 Feb;59(2):309–13.  
35  
36 767 33. Yesavage JA, Brink TL, Rose TL, Lum O, Huang V, Adey M, et al. Development and  
37 768 validation of a geriatric depression screening scale: A preliminary report. *J Psychiatr*  
38 769 *Res.* 1982 Jan;17(1):37–49.  
39  
40  
41 770 34. Guigoz Y, Vellas B, Garry PJ. Assessing the Nutritional Status of the Elderly: The Mini  
42 771 Nutritional Assessment as Part of the Geriatric Evaluation. *Nutr Rev.* 2009 Apr  
43 772 27;54(1):S59–65.  
44  
45 773 35. Arends J, Bodoky G, Bozzetti F, Fearon K, Muscaritoli M, Selga G, et al. ESPEN  
46 774 Guidelines on Enteral Nutrition: Non-surgical oncology. *Clin Nutr.* 2006 Apr;25(2):245–  
47 775 59.  
48  
49  
50 776 36. Weimann A, Braga M, Harsanyi L, Laviano A, Ljungqvist O, Soeters P, et al. ESPEN  
51 777 Guidelines on Enteral Nutrition: Surgery including Organ Transplantation. *Clin Nutr.*  
52 778 2006 Apr;25(2):224–44.  
53  
54 779 37. O’Mahony D, O’Sullivan D, Byrne S, O’Connor MN, Ryan C, Gallagher P.  
55 780 STOPP/START criteria for potentially inappropriate prescribing in older people: version  
56 781 2. *Age Ageing.* 2015 Mar;44(2):213–8.  
57  
58  
59  
60



- 1  
2  
3 782 38. Oken MM, Creech RH, Tormey DC, Horton J, Davis TE, McFadden ET, et al. Toxicity  
4 783 and response criteria of the Eastern Cooperative Oncology Group. *Am J Clin Oncol.*  
5 784 1982 Dec;5(6):649–55.
- 7 785 39. Lawton MP, Brody EM. Assessment of older people: self-maintaining and instrumental  
8 786 activities of daily living. *Gerontologist.* 1969 Autumn;9:179–86.
- 10 787 40. Bellera CA, Rainfray M, Mathoulin-Pélissier S, Mertens C, Delva F, Fonck M, et al.  
11 788 Screening older cancer patients: first evaluation of the G-8 geriatric screening tool. *Ann*  
12 789 *Oncol.* 2012 Aug;23(8):2166–72.
- 15 790 41. Topolski TD, LoGerfo J, Patrick DL, Williams B, Walwick J, Patrick MB. The Rapid  
16 791 Assessment of Physical Activity (RAPA) among older adults. *Prev Chronic Dis.* 2006  
17 792 Oct;3(4):A118.
- 19 793 42. de Souto Barreto P, Ferrandez A-M. Activités instrumentales physiques de la vie  
20 794 quotidienne chez les personnes âgées: validation d'une échelle. In: *L'anthropologie du*  
21 795 *vivant: objets et méthodes.* Chapuis-Lucciani N, Guihard-Costa AM, Boëtsch G. 2010.  
22 796 p. 83–7.
- 25 797 43. Quinten C, Coens C, Ghislain I, Zikos E, Sprangers MAG, Ringash J, et al. The effects  
26 798 of age on health-related quality of life in cancer populations: A pooled analysis of  
27 799 randomized controlled trials using the European Organisation for Research and  
28 800 Treatment of Cancer (EORTC) QLQ-C30 involving 6024 cancer patients. *Eur J Cancer.*  
29 801 2015 Dec;51(18):2808–19.
- 32 802 44. Wheelwright S, Darlington A-S, Fitzsimmons D, Fayers P, Arraras JI, Bonnetain F, et al.  
33 803 International validation of the EORTC QLQ-ELD14 questionnaire for assessment of  
34 804 health-related quality of life elderly patients with cancer. *Br J Cancer.* 2013  
35 805 Aug;109(4):852–8.
- 37 806 45. Janssen MF, Pickard AS, Golicki D, Gudex C, Niewada M, Scalone L, et al.  
38 807 Measurement properties of the EQ-5D-5L compared to the EQ-5D-3L across eight  
39 808 patient groups: a multi-country study. *Qual Life Res.* 2013 Sep;22(7):1717–27.
- 42 809 46. Ware JE, Sherbourne CD. The MOS 36-item short-form health survey (SF-36). I.  
43 810 Conceptual framework and item selection. *Med Care.* 1992 Jun;30(6):473–83.
- 45 811 47. Fish J. Short Physical Performance Battery. In: Kreutzer JS, DeLuca J, Caplan B,  
46 812 editors. *Encyclopedia of Clinical Neuropsychology* [Internet]. New York, NY: Springer  
47 813 New York; 2011 [cited 2020 Nov 4]. p. 2289–91. Available from:  
48 814 [http://link.springer.com/10.1007/978-0-387-79948-3\\_1832](http://link.springer.com/10.1007/978-0-387-79948-3_1832)
- 51 815 48. Podsiadlo D, Richardson S. The timed 'Up & Go': a test of basic functional mobility for  
52 816 frail elderly persons. *J Am Geriatr Soc.* 1991 Feb;39:142–8.
- 54 817 49. Krupp LB, LaRocca NG, Muir-Nash J, Steinberg AD. The fatigue severity scale.  
55 818 Application to patients with multiple sclerosis and systemic lupus erythematosus. *Arch*  
56 819 *Neurol.* 1989 Oct;46(10):1121–3.

- 1  
2  
3 820 50. Tinetti ME, Baker DI, McAvay G, Claus EB, Garrett P, Gottschalk M, et al. A  
4 821 Multifactorial Intervention to Reduce the Risk of Falling among Elderly People Living  
5 822 in the Community. *N Engl J Med*. 1994 Sep 29;331(13):821–7.
- 7 823 51. Borg G. Perceived exertion as an indicator of somatic stress. *Scand J Rehabil Med*.  
8 824 1970;2(2):92–8.
- 11 825 52. Agence Nationale d'Accréditation et d'Evaluation en Santé (ANAES). Assessment and  
12 826 follow-up of chronic pain in adults in ambulatory medicine. 1999 Feb;
- 14 827 53. Société Francophone Nutrition Clinique et Métabolisme (SFNCM). Evaluation of food  
15 828 intake.
- 18 829 54. Aaronson NK, Ahmedzai S, Bergman B, Bullinger M, Cull A, Duez NJ, et al. The  
19 830 European Organization for Research and Treatment of Cancer QLQ-C30: A Quality-of-  
20 831 Life Instrument for Use in International Clinical Trials in Oncology. *JNCI J Natl Cancer*  
21 832 *Inst*. 1993 Mar 3;85(5):365–76.
- 23 833 55. Wheelwright S, Darlington A-S, Fitzsimmons D, Fayers P, Arraras JI, Bonnetain F, et al.  
24 834 International validation of the EORTC QLQ-ELD14 questionnaire for assessment of  
25 835 health-related quality of life elderly patients with cancer. *Br J Cancer*. 2013 Aug  
26 836 20;109(4):852–8.
- 29 837 56. Boereboom C, Doleman B, Lund JN, Williams JP. Systematic review of pre-operative  
30 838 exercise in colorectal cancer patients. *Tech Coloproctology*. 2016 Feb 1;20(2):81–9.
- 32 839 57. Sun V, Raz DJ, Kim JY, Melstrom L, Hite S, Varatkar G, et al. Barriers and facilitators  
33 840 of adherence to a perioperative physical activity intervention for older adults with cancer  
34 841 and their family caregivers. *J Geriatr Oncol*. 2020 Mar 1;11(2):256–62.
- 37 842 58. Prehabilitation, rehabilitation, and revocation in the Army. *Br Med J*. 1946 Jun  
38 843 29;1:192–7.
- 40 844 59. Topp R, Ditmyer M, King K, Doherty K, Hornyak J. The effect of bed rest and potential  
41 845 of prehabilitation on patients in the intensive care unit. *AACN Clin Issues*. 2002  
42 846 May;13(2):263–76.
- 44 847 60. Ghignone F, van Leeuwen BL, Montroni I, Huisman MG, Somasundar P, Cheung KL, et  
45 848 al. The assessment and management of older cancer patients: A SIOG surgical task force  
46 849 survey on surgeons' attitudes. *Eur J Surg Oncol EJSO*. 2016 Feb;42(2):297–302.

850

851

1  
2  
3 852 **Illustrations' legends**  
4

5 853 Figure 1: PROADAPT program: interventions at the patient's level  
6

7 854 Table 1: PROADAPT programme: tasks according to the different domains and the  
8  
9  
10 855 successive chronological steps (before, during, and after complex medical-surgical  
11  
12 856 procedures)  
13

14 857 Table 2: PROADAPT pilot trial: questionnaires and screening tests  
15

16  
17 858 Table 3: PROADAPT pilot trial study: flow diagram  
18

19 859  
20

21 860  
22  
23  
24  
25  
26  
27  
28  
29  
30  
31  
32  
33  
34  
35  
36  
37  
38  
39  
40  
41  
42  
43  
44  
45  
46  
47  
48  
49  
50  
51  
52  
53  
54  
55  
56  
57  
58  
59  
60

For peer review only

861 Table 1: PROADAPT programme: tasks according to the different domains and the  
 862 successive chronological steps (before, during, and after complex medical-surgical  
 863 procedures)

|                                                   |                                                                                                                                                                                                                                                                                                                                                                                                                                                                                                                                                                                                 |                                                                                                                                                                                                                                                                                                                                                                                                                                                                                                                                                                                                                                                                                                                                                                                                                                                                                                                                                                                                                         |                                                                                                                                                                                                                                                                                                                                                                                                               |                                                                                                                                    |
|---------------------------------------------------|-------------------------------------------------------------------------------------------------------------------------------------------------------------------------------------------------------------------------------------------------------------------------------------------------------------------------------------------------------------------------------------------------------------------------------------------------------------------------------------------------------------------------------------------------------------------------------------------------|-------------------------------------------------------------------------------------------------------------------------------------------------------------------------------------------------------------------------------------------------------------------------------------------------------------------------------------------------------------------------------------------------------------------------------------------------------------------------------------------------------------------------------------------------------------------------------------------------------------------------------------------------------------------------------------------------------------------------------------------------------------------------------------------------------------------------------------------------------------------------------------------------------------------------------------------------------------------------------------------------------------------------|---------------------------------------------------------------------------------------------------------------------------------------------------------------------------------------------------------------------------------------------------------------------------------------------------------------------------------------------------------------------------------------------------------------|------------------------------------------------------------------------------------------------------------------------------------|
| Nurse coaching & education Bridging interventions | Coaching nurse self-presentation<br>Delivery of a personalised patient booklet<br>Care according to best practice guidelines:<br>- Confirm and document patient goals and treatment preferences, including advance directives.<br>- Confirm and document patient's healthcare proxy or surrogate decision-maker.<br>- In patients with existing advance directives, discuss new risks associated with the surgical procedure and an approach for potentially life-threatening problems consistent with the patient's values and preferences ("required reconsideration").<br>Weekly phone calls | Coaching nurse visits / phone calls<br>Communication of patient's preference to the staff                                                                                                                                                                                                                                                                                                                                                                                                                                                                                                                                                                                                                                                                                                                                                                                                                                                                                                                               | Coaching nurse visit in the rehabilitation ward<br>Communication of patient's preference and care difficulties to the staff (checklist):<br>- delirium/cognitive impairment<br>- peri-operative acute pain<br>- pulmonary complications<br>- fall risk<br>- ability to maintain adequate nutrition<br>- urinary tract infection prevention<br>- functional decline monitoring<br>- pressure ulcers prevention | Coaching nurse bi-weekly phone call<br>Communication of patient's care difficulties to the staff                                   |
| Nutrition                                         | W-4: nutritional evaluation<br>Nutritional plan based on measured intake<br>W-3: nutritional follow up - weight<br>W-2: nutritional follow up-weight<br>W-1: nutritional follow up-weight + pre-operative immunonutrition                                                                                                                                                                                                                                                                                                                                                                       | If surgery: care according to best practice guidelines:<br>- Consider shortened fluid fastin (clear liquids up to 2 hours before anaesthesia).(36)<br>- Normal food intake or enteral feeding should start as early as possible                                                                                                                                                                                                                                                                                                                                                                                                                                                                                                                                                                                                                                                                                                                                                                                         | Nutritional plan based on<br>- Weight curve<br>- Measured intake<br>Optimal management of<br>- Nausea/vomiting<br>- Abdominal pain                                                                                                                                                                                                                                                                            | Nutritional plan based on<br>- Weight curve<br>- Measured intake<br>Optimal management of<br>- Nausea/vomiting<br>- Abdominal pain |
| Physical activity                                 | W-4: physical performance evaluation<br>Physical activity plan<br>W-3 group physical activity<br>W-2 +<br>W-1 functional follow-up                                                                                                                                                                                                                                                                                                                                                                                                                                                              | If surgery: care according best practice guidelines:<br>- Early physical and/or occupational therapy.<br>- Check for orthostatic hypotension.<br>- Review physical environment to reduce injury risk.<br>- Assistive walking devices (e.g. walkers) at bedside if used as outpatient                                                                                                                                                                                                                                                                                                                                                                                                                                                                                                                                                                                                                                                                                                                                    | (to the discretion of the rehabilitation unit)                                                                                                                                                                                                                                                                                                                                                                | Pursuing of the pre-operative physical activity plan                                                                               |
| Medication conciliation                           | Centralised medication conciliation and treatment optimisation (STOPP/START guidelines)                                                                                                                                                                                                                                                                                                                                                                                                                                                                                                         | Centralised medication conciliation<br>Advices for care according best practice guidelines (16):<br>- Adhere to existing best practices regarding antibiotic and venous thromboembolism prophylaxis.<br>- Ensure nonessential medications have been stopped and essential medications have been taken.                                                                                                                                                                                                                                                                                                                                                                                                                                                                                                                                                                                                                                                                                                                  | Centralised medication conciliation                                                                                                                                                                                                                                                                                                                                                                           | Centralised medication conciliation                                                                                                |
| Standardisation of surgical procedures            |                                                                                                                                                                                                                                                                                                                                                                                                                                                                                                                                                                                                 | If surgery: consider antiseptic toothpaste<br>If surgery: care according to best practice guidelines (16):<br>- Consideration of regional techniques to avoid postoperative complications and improve pain control.<br>- Directed pain history.<br>- Multi-modal or opioid-sparing techniques.<br>- Postoperative nausea risk stratification and prevention strategies.<br>- Strategies to avoid pressure ulcers and nerve damage.<br>- Prevention of postoperative pulmonary complications and hypothermia.<br>- Judicious use of intravenous fluids.<br>- Appropriate haemodynamic management.<br>- Continuation of indicated cardiac medications.<br>- Daily post-operative rounding checklist:<br>- delirium/cognitive impairment<br>- peri-operative acute pain<br>- pulmonary complications<br>- fall risk<br>- ability to maintain adequate nutrition<br>- urinary tract infection prevention<br>- functional decline monitoring<br>- Pressure ulcers prevention<br>If surgery: consider IV iron supplementation |                                                                                                                                                                                                                                                                                                                                                                                                               |                                                                                                                                    |

864

865

866 Table 2: PROADAPT pilot trial: questionnaires and screening tests

| Domain                 |                                    |
|------------------------|------------------------------------|
| Autonomy               | ADL, IADL                          |
| Geriatric screening    | G8                                 |
| Physical activity      | RAPA, AIPVQ                        |
| Quality of life        | QLQ-C30, QLQ-ED14, EQ-5D-3L, SF-36 |
| Locomotion and balance | TUG test, SPPB                     |
| Pain                   | Pain scale                         |
| Nutrition              | Nutrition scale                    |
| Tiredness severity     | FSS                                |
| Depression/anxiety     | MNA, GDS4/GDS15                    |
| Cognitive assessment   | Mini-COG                           |
| Fall risk assessment   | Tinetti test                       |
| Breathlessness         | Borg scale                         |

867 Abbreviations: Abbreviations: ADL: Activities of Daily Living; AIPVQ: Physical Instrumental  
868 activities of daily living (in French: Activités Instrumentales Physiques de la Vie Quotidienne); EQ-  
869 5D-3L: EUROQOL evaluation of quality of life in five dimensions and three levels; FSS: Fatigue  
870 Severity Scale; GDS: Geriatric Depression Scale; IADL: Instrumental Activities of Daily Living;  
871 MNA: Mini Nutritional Assessment; QLQ-C30: quality of life questionnaire core 30 of the European  
872 organisation for research and treatment of cancer (EORTC); QLQ-ELD14: Older patients- specific  
873 quality of life questionnaire in 14 items of the EORTC; RAPA: Rapid Assessment of Physical  
874 Activity; SF-36: Short Form 36 Health Survey Questionnaire; SPPB: Short Physical Performance  
875 Battery  
876

877 **Table 3:** PROADAPT pilot study: flow diagram

|                                             | Baseline | Pre-therapeutic visit<br>(0-5 days before<br>intervention) | M1, M3, M6 | M12 | End of<br>study visit |
|---------------------------------------------|----------|------------------------------------------------------------|------------|-----|-----------------------|
| <i>Comprehensive geriatric assessment</i>   |          |                                                            |            |     |                       |
| G8                                          | X        |                                                            |            | X   | X                     |
| ADL/IADL                                    | X        |                                                            |            | X   | X                     |
| GDS4/GDS15                                  | X        |                                                            |            | X   | X                     |
| Mini COG                                    | X        |                                                            |            | X   | X                     |
| MNA                                         | X        |                                                            |            | X   | X                     |
| QLQ-C30                                     | X        |                                                            | X          | X   | X                     |
| QLQ-ELD14                                   | X        |                                                            | X          | X   | X                     |
| EQ-5D-3L                                    | X        |                                                            | X          | X   | X                     |
| Pain scale                                  | X        | X                                                          | X          | X   | X                     |
| Nutrition scale                             | X        | X                                                          | X          | X   | X                     |
| Socio-economic evaluation                   | X        |                                                            |            |     |                       |
| <i>Physical and respiratory assessments</i> |          |                                                            |            |     |                       |
| FSS                                         | X        |                                                            | X          | X   | X                     |
| SF-36                                       | X        |                                                            | X          | X   | X                     |
| Timed Up and Go                             | X        |                                                            |            | X   | X                     |
| SPPB                                        | X        |                                                            | X          | X   | X                     |
| Borg scale                                  | X        |                                                            |            | X   | X                     |
| RAPA questionnaire                          | X        |                                                            | X          | X   | X                     |
| AIPVQ scale                                 | X        |                                                            | X          | X   | X                     |
| Tinetti test                                | X        |                                                            |            | X   | X                     |
| Equimog evaluation                          | X        |                                                            |            | X   | X                     |
| Triflo II                                   | X        | X                                                          |            |     |                       |
| Voldyne                                     | X        | X                                                          |            |     |                       |
| Physical activity data collection           |          | X                                                          | X          | X   | X                     |
| <i>Patient satisfaction</i>                 |          |                                                            |            |     |                       |
| Standardised questionnaire                  |          |                                                            |            |     | X                     |

878 Abbreviations: ADL: Activities of Daily Living; AIPVQ: Physical Instrumental activities of daily living (in  
879 French: Activités Instrumentales Physiques de la Vie Quotidienne); EQ-5D-3L: EUROQOL evaluation of quality  
880 of life in five dimensions and three levels; FSS: Fatigue Severity Scale; GDS: Geriatric Depression Scale; IADL:  
881 Instrumental Activities of Daily Living; MNA: Mini Nutritional Assessment; QLQ-C30: quality of life  
882 questionnaire core 30 of the European organisation for research and treatment of cancer (EORTC); QLQ-ELD14:  
883 Older patients- specific quality of life questionnaire in 14 items of the EORTC; RAPA: Rapid Assessment of  
884 Physical Activity; SF-36: Short Form 36 Health Survey Questionnaire; SPPB: Short Physical Performance Battery  
885

1  
2  
3  
4  
5  
6  
7  
8  
9  
10  
11  
12  
13  
14  
15  
16  
17  
18  
19  
20  
21  
22  
23  
24  
25  
26  
27  
28  
29  
30  
31  
32  
33  
34  
35  
36  
37  
38  
39  
40  
41  
42  
43  
44  
45  
46  
47  
48  
49  
50  
51  
52  
53  
54  
55  
56  
57  
58  
59  
60

886

For peer review only

Figure 1 : PROADAPT program : interventions at the patient’s level

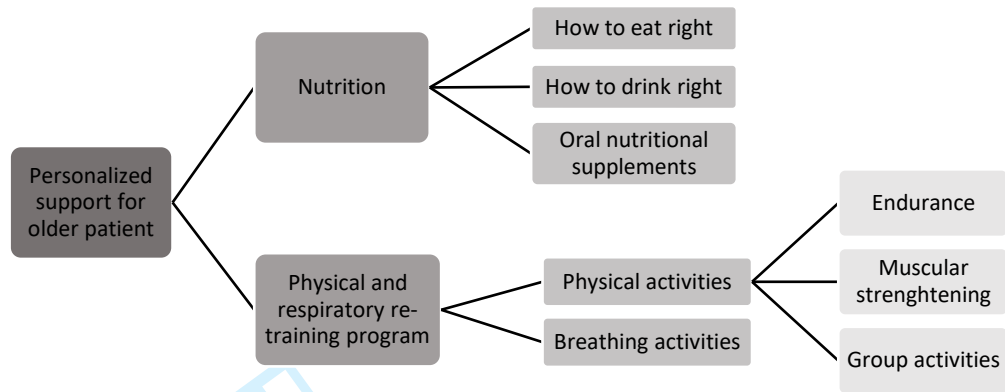

For peer review only

1  
2  
3  
4  
5  
6  
7  
8  
9  
10  
11  
12  
13  
14  
15  
16  
17  
18  
19  
20  
21  
22  
23  
24  
25  
26  
27  
28  
29  
30  
31  
32  
33  
34  
35  
36  
37  
38  
39  
40  
41  
42  
43  
44  
45  
46  
47  
48  
49  
50  
51  
52  
53  
54  
55  
56  
57  
58  
59  
60



Supplementary file 1: Patient satisfaction assessment of the PROADAPT programme

|                                                                                                                                                                          |                                                       |
|--------------------------------------------------------------------------------------------------------------------------------------------------------------------------|-------------------------------------------------------|
| <br>Hospices Civils de Lyon<br>Direction de la Recherche Clinique<br>et de l'Innovation | <h2>PATIENT ASSESSMENT OF THE PROADAPT PROGRAMME</h2> |
|--------------------------------------------------------------------------------------------------------------------------------------------------------------------------|-------------------------------------------------------|

Dear Sir or Madam,

You have been part of the PROADAPT - pilot study and we thank you for your involvement. In order to assess and improve this study, we would like to collect your opinion. This opinion is anonymous and does not affect your healthcare.

**The following questions are concerning the patient booklet that was given to you as part of the study**

If you consider the booklet overall

- |                                                 |                                     |                                   |                                     |
|-------------------------------------------------|-------------------------------------|-----------------------------------|-------------------------------------|
| • Did the explanations seem appropriate to you? | Not at all <input type="checkbox"/> | A little <input type="checkbox"/> | Absolutely <input type="checkbox"/> |
| • Did the information seem clear to you?        | Not at all <input type="checkbox"/> | A little <input type="checkbox"/> | Absolutely <input type="checkbox"/> |
| • Did the pages seem readable enough?           | Not at all <input type="checkbox"/> | A little <input type="checkbox"/> | Absolutely <input type="checkbox"/> |
| • Did the illustrations seem clear to you?      | Not at all <input type="checkbox"/> | A little <input type="checkbox"/> | Absolutely <input type="checkbox"/> |

How would you rate the booklet?

(useless = 0 ; very useful = 10)

0 1 2 3 4 5 6 7 8 9 10

**The following questions are concerning the overall PROADAPT programme (breathing and physical exercises, booklet, calls, and follow-up visits)**

Did you have difficulty in understanding the explanations given by the medical staff

- |                                                                                   |                                     |                                   |                                |
|-----------------------------------------------------------------------------------|-------------------------------------|-----------------------------------|--------------------------------|
| • for breathing exercises?                                                        | Not at all <input type="checkbox"/> | A little <input type="checkbox"/> | A lot <input type="checkbox"/> |
| • for physical exercises?                                                         | Not at all <input type="checkbox"/> | A little <input type="checkbox"/> | A lot <input type="checkbox"/> |
| • for nutritional advices?                                                        | Not at all <input type="checkbox"/> | A little <input type="checkbox"/> | A lot <input type="checkbox"/> |
| • during the assessment with the physician of the different drugs you are taking? | Not at all <input type="checkbox"/> | A little <input type="checkbox"/> | A lot <input type="checkbox"/> |

Did you encounter any difficulties

- for the realisation of breathing exercises ? Not at all  A little  A lot
- for the realisation of physical exercises ? Not at all  A little  A lot
- for the application of nutritional advice? Not at all  A little  A lot
- for the recording of activities? Not at all  A little  A lot

How do you estimate nursing phone calls

- at the beginning of your healthcare before your surgery / radiotherapy Useless  Of little importance  Needed
- after your surgery / radiotherapy Useless  Of little importance  Needed

Would you have liked to have more information? No  Yes

If yes, on which aspect

.....

.....

.....

.....

What would you propose to make the programme more suitable for patients?

.....

.....

.....

.....

Thank you for your time, we will use your opinions to improve the PROADAPT programme and the patient booklet.

Prof Claire Falandry, study coordinator

Supplementary file 2: Patient satisfaction assessment of ID-PROADAPT® eHealth device

|                                                                                                                                                                                |                                                                                              |
|--------------------------------------------------------------------------------------------------------------------------------------------------------------------------------|----------------------------------------------------------------------------------------------|
|  <p>Hospices Civils de Lyon<br/>Direction de la Recherche Clinique<br/>et de l'Innovation</p> | <p><b>ASSESSMENT OF THE ID-PROADAPT® DEVICE,<br/>COMPANION OF THE PROADAPT PROGRAMME</b></p> |
|--------------------------------------------------------------------------------------------------------------------------------------------------------------------------------|----------------------------------------------------------------------------------------------|

Dear Sir or Madam,

You have been part of the PROADAPT-pilot study and we thank you for your involvement. In order to assess and improve this study, we would like to collect your opinion. This opinion is anonymous and does not affect your healthcare.

**The following questions are concerning your experience with the PROADAPT programme as proposed in the ID-PROADAPT® device**

If you consider the PROADAPT programme provided using ID-PROADAPT® device overall

- Did the font appear easy to read?      Not at all       A little       Absolutely
- Did you manage to use the stylus easily?      Not at all       A little       Absolutely
- Did you experience any visual fatigue after watching the program?      Not at all       A little       Absolutely
- Were you tired at the end of filling out the various questionnaires?      Not at all       A little       Absolutely
- Have you encountered connection problems?      Not at all       A little       Absolutely
- Were you bothered by certain colors?      Not at all       A little       Absolutely

If yes: which ones?

.....      .....      .....

**The following questions concern the overall PROADAPT programme (breathing and physical exercises, booklet, calls, and follow-up visits)**

Did you have difficulty in understanding the explanations given proposed in the ID-PROADAPT® device?

- for breathing exercises?      Not at all       A little       A lot
- for physical exercises?      Not at all       A little       A lot
- for nutritional advices?      Not at all       A little       A lot

**Ergonomics evaluation of the ID-PROADAPT® device**

We now ask you to focus on your ergonomics (ease of use) of the PROADAPT program that was proposed on the provided tablet. Please indicate on this scale how you rate each statement.

|                                                                                              | Not agree at all         | Somewhat agree           | Neither agree nor disagree | Somewhat agree           | Totally agree            |
|----------------------------------------------------------------------------------------------|--------------------------|--------------------------|----------------------------|--------------------------|--------------------------|
| I have used the <b>PROADAPT program regularly</b>                                            | <input type="checkbox"/> | <input type="checkbox"/> | <input type="checkbox"/>   | <input type="checkbox"/> | <input type="checkbox"/> |
| I find the PROADAPT program <b>unnecessarily complex</b>                                     | <input type="checkbox"/> | <input type="checkbox"/> | <input type="checkbox"/>   | <input type="checkbox"/> | <input type="checkbox"/> |
| I find the PROADAPT program <b>easy to use</b>                                               | <input type="checkbox"/> | <input type="checkbox"/> | <input type="checkbox"/>   | <input type="checkbox"/> | <input type="checkbox"/> |
| I regularly <b>needed help from technical support</b> to be able to use the PROADAPT program | <input type="checkbox"/> | <input type="checkbox"/> | <input type="checkbox"/>   | <input type="checkbox"/> | <input type="checkbox"/> |
| I find that the <b>different functions</b> of the PROADAPT program have been well integrated | <input type="checkbox"/> | <input type="checkbox"/> | <input type="checkbox"/>   | <input type="checkbox"/> | <input type="checkbox"/> |
| I find there are <b>too many inconsistencies</b> in the PROADAPT program                     | <input type="checkbox"/> | <input type="checkbox"/> | <input type="checkbox"/>   | <input type="checkbox"/> | <input type="checkbox"/> |
| I find the PROADAPT program <b>very restrictive to use</b>                                   | <input type="checkbox"/> | <input type="checkbox"/> | <input type="checkbox"/>   | <input type="checkbox"/> | <input type="checkbox"/> |
| I feel <b>very confident</b> using the PROADAPT program                                      | <input type="checkbox"/> | <input type="checkbox"/> | <input type="checkbox"/>   | <input type="checkbox"/> | <input type="checkbox"/> |
| I needed to <b>learn a lot</b> before I could use the PROADAPT program effectively           | <input type="checkbox"/> | <input type="checkbox"/> | <input type="checkbox"/>   | <input type="checkbox"/> | <input type="checkbox"/> |

**User experience evaluation**

We now ask you to focus on your overall experience with the PROADAPT interface. We offer two opposite terms and a 7-point scale. Please indicate on this scale where your impression is located.

|                         |                       |                       |                       |                       |                       |                       |                       |                         |
|-------------------------|-----------------------|-----------------------|-----------------------|-----------------------|-----------------------|-----------------------|-----------------------|-------------------------|
| <b>Annoying</b>         | <input type="radio"/> | <b>Cheering</b>         |
| <b>Incomprehensible</b> | <input type="radio"/> | <b>Understandable</b>   |
| <b>Creative</b>         | <input type="radio"/> | <b>Monotone</b>         |
| <b>Easy to use</b>      | <input type="radio"/> | <b>Difficult to use</b> |
| <b>Precious</b>         | <input type="radio"/> | <b>Poor</b>             |
| <b>Boring</b>           | <input type="radio"/> | <b>Captivating</b>      |
| <b>Uninteresting</b>    | <input type="radio"/> | <b>Interesting</b>      |
| <b>Unpredictable</b>    | <input type="radio"/> | <b>Predictable</b>      |

|                     |                       |                       |                       |                       |                       |                       |                       |                     |
|---------------------|-----------------------|-----------------------|-----------------------|-----------------------|-----------------------|-----------------------|-----------------------|---------------------|
| <b>Fast</b>         | <input type="radio"/> | <b>Slow</b>         |
| <b>Original</b>     | <input type="radio"/> | <b>Conventional</b> |
| <b>Handicapping</b> | <input type="radio"/> | <b>Helping</b>      |
| <b>Good</b>         | <input type="radio"/> | <b>Bad</b>          |
| <b>Complicated</b>  | <input type="radio"/> | <b>Simple</b>       |
| <b>Repulsive</b>    | <input type="radio"/> | <b>Attractive</b>   |
| <b>Common</b>       | <input type="radio"/> | <b>Unpublished</b>  |
| <b>Unpleasant</b>   | <input type="radio"/> | <b>Pleasant</b>     |

Would you have liked to have more information? No  Yes

If yes, on which aspect?

.....  
 .....  
 .....

What would you propose to make the programme more suitable for patients?

.....  
 .....  
 .....  
 .....

How would you rate the contents of the tablet?

(not adapted = 0 ; very suitable = 10)

0 1 2 3 4 5 6 7 8 9 10

How would you rate the overall organisation of the program?

(not adapted = 0 ; very suitable = 10)

0 1 2 3 4 5 6 7 8 9 10

How would you rate the intuitive nature of the tablet?

(not adapted = 0 ; very suitable = 10)

0 1 2 3 4 5 6 7 8 9 10

How would you rate the videos on the tablet?

(not adapted = 0 ; very suitable = 10)

0 1 2 3 4 5 6 7 8 9 10

Thank you for your time, we will use your opinions to improve the ID-PROADAPT® device and the PROADAPT programme.

Prof Claire Falandry, study coordinator

## Supplementary table 1: SPIRIT 2013 checklist of the trial

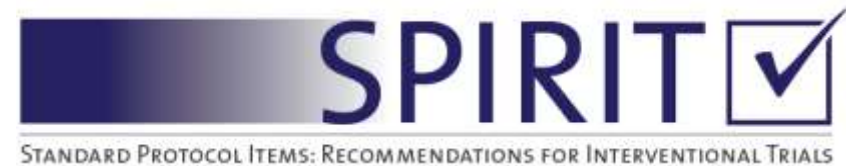

## SPIRIT 2013 Checklist: Recommended items to address in a clinical trial protocol and related documents\*

| Section/item                      | ItemNo | Description                                                                                                                                                                                                                                                                              | Reported on page #                                    |
|-----------------------------------|--------|------------------------------------------------------------------------------------------------------------------------------------------------------------------------------------------------------------------------------------------------------------------------------------------|-------------------------------------------------------|
| <b>Administrative information</b> |        |                                                                                                                                                                                                                                                                                          |                                                       |
| Title                             | 1      | Descriptive title identifying the study design, population, interventions, and, if applicable, trial acronym                                                                                                                                                                             | 1                                                     |
| Trial registration                | 2a     | Trial identifier and registry name. If not yet registered, name of intended registry                                                                                                                                                                                                     | 2                                                     |
|                                   | 2b     | All items from the World Health Organization Trial Registration Data Set                                                                                                                                                                                                                 | Supplementary table 2<br>Ref 24                       |
| Protocol version                  | 3      | Date and version identifier                                                                                                                                                                                                                                                              | 17 (Ethics and Consent to participate)                |
| Funding                           | 4      | Sources and types of financial, material, and other support                                                                                                                                                                                                                              | 17-18 (Funding)                                       |
| Roles and responsibilities        | 5a     | Names, affiliations, and roles of protocol contributors                                                                                                                                                                                                                                  | 1 (Authors' list)<br>18 (Authors' contributions)      |
|                                   | 5b     | Name and contact information for the trial sponsor                                                                                                                                                                                                                                       | Supplementary table 2<br>Ref 24                       |
|                                   | 5c     | Role of study sponsor and funders, if any, in study design; collection, management, analysis, and interpretation of data; writing of the report; and the decision to submit the report for publication, including whether they will have ultimate authority over any of these activities | 10 (Ethical and legal considerations)<br>17 (Funding) |

1  
2  
3  
4  
5  
6  
7  
8  
9  
10  
11  
12  
13  
14  
15  
16  
17  
18  
19  
20  
21  
22  
23  
24  
25  
26  
27  
28  
29  
30  
31  
32  
33  
34  
35  
36  
37  
38  
39  
40  
41  
42  
43  
44  
45  
46

|  |    |                                                                                                                                                                                                                                                                  |                                                                       |
|--|----|------------------------------------------------------------------------------------------------------------------------------------------------------------------------------------------------------------------------------------------------------------------|-----------------------------------------------------------------------|
|  | 5d | Composition, roles, and responsibilities of the coordinating centre, steering committee, endpoint adjudication committee, data management team, and other individuals or groups overseeing the trial, if applicable (see Item 21a for data monitoring committee) | 13 (Data management and statistical analyses)<br>14 (Data monitoring) |
|--|----|------------------------------------------------------------------------------------------------------------------------------------------------------------------------------------------------------------------------------------------------------------------|-----------------------------------------------------------------------|

**Introduction**

|                          |    |                                                                                                                                                                                                           |     |
|--------------------------|----|-----------------------------------------------------------------------------------------------------------------------------------------------------------------------------------------------------------|-----|
| Background and rationale | 6a | Description of research question and justification for undertaking the trial, including summary of relevant studies (published and unpublished) examining benefits and harms for each intervention        | 3   |
|                          | 6b | Explanation for choice of comparators                                                                                                                                                                     | N/A |
| Objectives               | 7  | Specific objectives or hypotheses                                                                                                                                                                         | 4   |
| Trial design             | 8  | Description of trial design including type of trial (eg, parallel group, crossover, factorial, single group), allocation ratio, and framework (eg, superiority, equivalence, noninferiority, exploratory) | 5   |

**Methods: Participants, interventions, and outcomes**

|                      |     |                                                                                                                                                                                              |     |
|----------------------|-----|----------------------------------------------------------------------------------------------------------------------------------------------------------------------------------------------|-----|
| Study setting        | 9   | Description of study settings (eg, community clinic, academic hospital) and list of countries where data will be collected. Reference to where list of study sites can be obtained           | 5   |
| Eligibility criteria | 10  | Inclusion and exclusion criteria for participants. If applicable, eligibility criteria for study centres and individuals who will perform the interventions (eg, surgeons, psychotherapists) | 5   |
| Interventions        | 11a | Interventions for each group with sufficient detail to allow replication, including how and when they will be administered                                                                   | 5-6 |

|    |                                                                     |     |                                                                                                                                                                                                                                                                                                                                                                                |
|----|---------------------------------------------------------------------|-----|--------------------------------------------------------------------------------------------------------------------------------------------------------------------------------------------------------------------------------------------------------------------------------------------------------------------------------------------------------------------------------|
| 1  |                                                                     |     |                                                                                                                                                                                                                                                                                                                                                                                |
| 2  |                                                                     |     |                                                                                                                                                                                                                                                                                                                                                                                |
| 3  |                                                                     |     |                                                                                                                                                                                                                                                                                                                                                                                |
| 4  |                                                                     | 11b | Criteria for discontinuing or modifying allocated interventions for a given trial participant (eg, drug dose change in response to harms, participant request, or improving/worsening disease)                                                                                                                                                                                 |
| 5  |                                                                     |     | 14 (End of protocol)                                                                                                                                                                                                                                                                                                                                                           |
| 6  |                                                                     |     | And N/4 (no dose modifications)                                                                                                                                                                                                                                                                                                                                                |
| 7  |                                                                     |     |                                                                                                                                                                                                                                                                                                                                                                                |
| 8  |                                                                     | 11c | Strategies to improve adherence to intervention protocols, and any procedures for monitoring adherence (eg, drug tablet return, laboratory tests)                                                                                                                                                                                                                              |
| 9  |                                                                     |     | 6 (two turns of validations of the PROADAPT booklet by candidate patients)                                                                                                                                                                                                                                                                                                     |
| 10 |                                                                     |     |                                                                                                                                                                                                                                                                                                                                                                                |
| 11 |                                                                     |     |                                                                                                                                                                                                                                                                                                                                                                                |
| 12 |                                                                     |     |                                                                                                                                                                                                                                                                                                                                                                                |
| 13 |                                                                     | 11d | Relevant concomitant care and interventions that are permitted or prohibited during the trial                                                                                                                                                                                                                                                                                  |
| 14 |                                                                     |     | N/A                                                                                                                                                                                                                                                                                                                                                                            |
| 15 |                                                                     |     |                                                                                                                                                                                                                                                                                                                                                                                |
| 16 | Outcomes                                                            | 12  | Primary, secondary, and other outcomes, including the specific measurement variable (eg, systolic blood pressure), analysis metric (eg, change from baseline, final value, time to event), method of aggregation (eg, median, proportion), and time point for each outcome. Explanation of the clinical relevance of chosen efficacy and harm outcomes is strongly recommended |
| 17 |                                                                     |     | 11-12                                                                                                                                                                                                                                                                                                                                                                          |
| 18 |                                                                     |     |                                                                                                                                                                                                                                                                                                                                                                                |
| 19 |                                                                     |     |                                                                                                                                                                                                                                                                                                                                                                                |
| 20 |                                                                     |     |                                                                                                                                                                                                                                                                                                                                                                                |
| 21 |                                                                     |     |                                                                                                                                                                                                                                                                                                                                                                                |
| 22 | Participant timeline                                                | 13  | Time schedule of enrolment, interventions (including any run-ins and washouts), assessments, and visits for participants. A schematic diagram is highly recommended (see Figure)                                                                                                                                                                                               |
| 23 |                                                                     |     | 8-9                                                                                                                                                                                                                                                                                                                                                                            |
| 24 |                                                                     |     |                                                                                                                                                                                                                                                                                                                                                                                |
| 25 |                                                                     |     |                                                                                                                                                                                                                                                                                                                                                                                |
| 26 | Sample size                                                         | 14  | Estimated number of participants needed to achieve study objectives and how it was determined, including clinical and statistical assumptions supporting any sample size calculations                                                                                                                                                                                          |
| 27 |                                                                     |     | 12-13 (Sample size calculation)                                                                                                                                                                                                                                                                                                                                                |
| 28 |                                                                     |     |                                                                                                                                                                                                                                                                                                                                                                                |
| 29 |                                                                     |     |                                                                                                                                                                                                                                                                                                                                                                                |
| 30 | Recruitment                                                         | 15  | Strategies for achieving adequate participant enrolment to reach target sample size                                                                                                                                                                                                                                                                                            |
| 31 |                                                                     |     | N/A (no problem for accrual)                                                                                                                                                                                                                                                                                                                                                   |
| 32 |                                                                     |     |                                                                                                                                                                                                                                                                                                                                                                                |
| 33 | <b>Methods: Assignment of interventions (for controlled trials)</b> |     | <b>N/A</b>                                                                                                                                                                                                                                                                                                                                                                     |
| 34 |                                                                     |     |                                                                                                                                                                                                                                                                                                                                                                                |
| 35 | Allocation:                                                         |     |                                                                                                                                                                                                                                                                                                                                                                                |
| 36 |                                                                     |     |                                                                                                                                                                                                                                                                                                                                                                                |
| 37 |                                                                     |     |                                                                                                                                                                                                                                                                                                                                                                                |
| 38 |                                                                     |     |                                                                                                                                                                                                                                                                                                                                                                                |
| 39 |                                                                     |     |                                                                                                                                                                                                                                                                                                                                                                                |
| 40 |                                                                     |     |                                                                                                                                                                                                                                                                                                                                                                                |
| 41 |                                                                     |     |                                                                                                                                                                                                                                                                                                                                                                                |
| 42 |                                                                     |     |                                                                                                                                                                                                                                                                                                                                                                                |
| 43 |                                                                     |     |                                                                                                                                                                                                                                                                                                                                                                                |
| 44 |                                                                     |     |                                                                                                                                                                                                                                                                                                                                                                                |
| 45 |                                                                     |     |                                                                                                                                                                                                                                                                                                                                                                                |
| 46 |                                                                     |     |                                                                                                                                                                                                                                                                                                                                                                                |



1  
2  
3  
4  
5  
6  
7  
8  
9  
10  
11  
12  
13  
14  
15  
16  
17  
18  
19  
20  
21  
22  
23  
24  
25  
26  
27  
28  
29  
30  
31  
32  
33  
34  
35  
36  
37  
38  
39  
40  
41  
42  
43  
44  
45  
46

|                                  |     |                                                                                                                                                                                                                                                                                                                                                          |   |
|----------------------------------|-----|----------------------------------------------------------------------------------------------------------------------------------------------------------------------------------------------------------------------------------------------------------------------------------------------------------------------------------------------------------|---|
| Sequence generation              | 16a | Method of generating the allocation sequence (eg, computer-generated random numbers), and list of any factors for stratification. To reduce predictability of a random sequence, details of any planned restriction (eg, blocking) should be provided in a separate document that is unavailable to those who enrol participants or assign interventions | - |
| Allocation concealment mechanism | 16b | Mechanism of implementing the allocation sequence (eg, central telephone; sequentially numbered, opaque, sealed envelopes), describing any steps to conceal the sequence until interventions are assigned                                                                                                                                                | - |
| Implementation                   | 16c | Who will generate the allocation sequence, who will enrol participants, and who will assign participants to interventions                                                                                                                                                                                                                                | - |
| Blinding (masking)               | 17a | Who will be blinded after assignment to interventions (eg, trial participants, care providers, outcome assessors, data analysts), and how                                                                                                                                                                                                                | - |
|                                  | 17b | If blinded, circumstances under which unblinding is permissible, and procedure for revealing a participant’s allocated intervention during the trial                                                                                                                                                                                                     | - |

**Methods: Data collection, management, and analysis**

|                         |     |                                                                                                                                                                                                                                                                                                                                                                                                              |                                               |
|-------------------------|-----|--------------------------------------------------------------------------------------------------------------------------------------------------------------------------------------------------------------------------------------------------------------------------------------------------------------------------------------------------------------------------------------------------------------|-----------------------------------------------|
| Data collection methods | 18a | Plans for assessment and collection of outcome, baseline, and other trial data, including any related processes to promote data quality (eg, duplicate measurements, training of assessors) and a description of study instruments (eg, questionnaires, laboratory tests) along with their reliability and validity, if known. Reference to where data collection forms can be found, if not in the protocol | Table 3                                       |
|                         | 18b | Plans to promote participant retention and complete follow-up, including list of any outcome data to be collected for participants who discontinue or deviate from intervention protocols                                                                                                                                                                                                                    | N/A                                           |
| Data management         | 19  | Plans for data entry, coding, security, and storage, including any related processes to promote data quality (eg, double data entry; range checks for data values). Reference to where details of data management procedures can be found, if not in the protocol                                                                                                                                            | 13 (Data management and statistical analyses) |

|    |                                 |     |                                                                                                                                                                                                                                                                                                                                       |                                                                   |
|----|---------------------------------|-----|---------------------------------------------------------------------------------------------------------------------------------------------------------------------------------------------------------------------------------------------------------------------------------------------------------------------------------------|-------------------------------------------------------------------|
| 1  |                                 |     |                                                                                                                                                                                                                                                                                                                                       |                                                                   |
| 2  |                                 |     |                                                                                                                                                                                                                                                                                                                                       |                                                                   |
| 3  |                                 |     |                                                                                                                                                                                                                                                                                                                                       |                                                                   |
| 4  | Statistical methods             | 20a | Statistical methods for analysing primary and secondary outcomes. Reference to where other details of the statistical analysis plan can be found, if not in the protocol                                                                                                                                                              | 13-14 (Data management and statistical analyses)                  |
| 5  |                                 |     |                                                                                                                                                                                                                                                                                                                                       |                                                                   |
| 6  |                                 | 20b | Methods for any additional analyses (eg, subgroup and adjusted analyses)                                                                                                                                                                                                                                                              | N/A                                                               |
| 7  |                                 |     |                                                                                                                                                                                                                                                                                                                                       |                                                                   |
| 8  |                                 | 20c | Definition of analysis population relating to protocol non-adherence (eg, as randomised analysis), and any statistical methods to handle missing data (eg, multiple imputation)                                                                                                                                                       | N/A                                                               |
| 9  |                                 |     |                                                                                                                                                                                                                                                                                                                                       |                                                                   |
| 10 |                                 |     |                                                                                                                                                                                                                                                                                                                                       |                                                                   |
| 11 |                                 |     |                                                                                                                                                                                                                                                                                                                                       |                                                                   |
| 12 | <b>Methods: Monitoring</b>      |     |                                                                                                                                                                                                                                                                                                                                       |                                                                   |
| 13 |                                 |     |                                                                                                                                                                                                                                                                                                                                       |                                                                   |
| 14 | Data monitoring                 | 21a | Composition of data monitoring committee (DMC); summary of its role and reporting structure; statement of whether it is independent from the sponsor and competing interests; and reference to where further details about its charter can be found, if not in the protocol. Alternatively, an explanation of why a DMC is not needed | 14 (Data Monitoring)                                              |
| 15 |                                 |     |                                                                                                                                                                                                                                                                                                                                       |                                                                   |
| 16 |                                 | 21b | Description of any interim analyses and stopping guidelines, including who will have access to these interim results and make the final decision to terminate the trial                                                                                                                                                               | N/A                                                               |
| 17 |                                 |     |                                                                                                                                                                                                                                                                                                                                       |                                                                   |
| 18 |                                 |     |                                                                                                                                                                                                                                                                                                                                       |                                                                   |
| 19 |                                 |     |                                                                                                                                                                                                                                                                                                                                       |                                                                   |
| 20 |                                 |     |                                                                                                                                                                                                                                                                                                                                       |                                                                   |
| 21 |                                 |     |                                                                                                                                                                                                                                                                                                                                       |                                                                   |
| 22 |                                 |     |                                                                                                                                                                                                                                                                                                                                       |                                                                   |
| 23 | Harms                           | 22  | Plans for collecting, assessing, reporting, and managing solicited and spontaneously reported adverse events and other unintended effects of trial interventions or trial conduct                                                                                                                                                     | 11 (Secondary outcomes: NCI CTCAE, QOL)                           |
| 24 |                                 |     |                                                                                                                                                                                                                                                                                                                                       |                                                                   |
| 25 |                                 |     |                                                                                                                                                                                                                                                                                                                                       |                                                                   |
| 26 |                                 |     |                                                                                                                                                                                                                                                                                                                                       |                                                                   |
| 27 |                                 |     |                                                                                                                                                                                                                                                                                                                                       |                                                                   |
| 28 | Auditing                        | 23  | Frequency and procedures for auditing trial conduct, if any, and whether the process will be independent from investigators and the sponsor                                                                                                                                                                                           | N/A                                                               |
| 29 |                                 |     |                                                                                                                                                                                                                                                                                                                                       |                                                                   |
| 30 |                                 |     |                                                                                                                                                                                                                                                                                                                                       |                                                                   |
| 31 | <b>Ethics and dissemination</b> |     |                                                                                                                                                                                                                                                                                                                                       |                                                                   |
| 32 |                                 |     |                                                                                                                                                                                                                                                                                                                                       |                                                                   |
| 33 | Research ethics approval        | 24  | Plans for seeking research ethics committee/institutional review board (REC/IRB) approval                                                                                                                                                                                                                                             | 10 (Ethical and legal considerations)                             |
| 34 |                                 |     |                                                                                                                                                                                                                                                                                                                                       |                                                                   |
| 35 |                                 |     |                                                                                                                                                                                                                                                                                                                                       |                                                                   |
| 36 | Protocol amendments             | 25  | Plans for communicating important protocol modifications (eg, changes to eligibility criteria, outcomes, analyses) to relevant parties (eg, investigators, REC/IRBs, trial participants, trial registries, journals, regulators)                                                                                                      | 10 (Ethical and legal considerations)<br>14 (Protocol amendments) |
| 37 |                                 |     |                                                                                                                                                                                                                                                                                                                                       |                                                                   |
| 38 |                                 |     |                                                                                                                                                                                                                                                                                                                                       |                                                                   |
| 39 |                                 |     |                                                                                                                                                                                                                                                                                                                                       |                                                                   |
| 40 |                                 |     |                                                                                                                                                                                                                                                                                                                                       |                                                                   |
| 41 |                                 |     |                                                                                                                                                                                                                                                                                                                                       |                                                                   |
| 42 |                                 |     |                                                                                                                                                                                                                                                                                                                                       |                                                                   |
| 43 |                                 |     |                                                                                                                                                                                                                                                                                                                                       |                                                                   |
| 44 |                                 |     |                                                                                                                                                                                                                                                                                                                                       |                                                                   |
| 45 |                                 |     |                                                                                                                                                                                                                                                                                                                                       |                                                                   |
| 46 |                                 |     |                                                                                                                                                                                                                                                                                                                                       |                                                                   |

|    |                               |     |                                                                                                                                                                                                                                                                                     |                                          |
|----|-------------------------------|-----|-------------------------------------------------------------------------------------------------------------------------------------------------------------------------------------------------------------------------------------------------------------------------------------|------------------------------------------|
| 1  |                               |     |                                                                                                                                                                                                                                                                                     |                                          |
| 2  |                               |     |                                                                                                                                                                                                                                                                                     |                                          |
| 3  |                               |     |                                                                                                                                                                                                                                                                                     |                                          |
| 4  | Consent or assent             | 26a | Who will obtain informed consent or assent from potential trial participants or authorised surrogates, and how (see Item 32)                                                                                                                                                        | 10-11 (Ethical and legal considerations) |
| 5  |                               |     |                                                                                                                                                                                                                                                                                     |                                          |
| 6  |                               | 26b | Additional consent provisions for collection and use of participant data and biological specimens in ancillary studies, if applicable                                                                                                                                               | N/A                                      |
| 7  |                               |     |                                                                                                                                                                                                                                                                                     |                                          |
| 8  |                               |     |                                                                                                                                                                                                                                                                                     |                                          |
| 9  | Confidentiality               | 27  | How personal information about potential and enrolled participants will be collected, shared, and maintained in order to protect confidentiality before, during, and after the trial                                                                                                | 14 (Confidentiality)                     |
| 10 |                               |     |                                                                                                                                                                                                                                                                                     |                                          |
| 11 |                               |     |                                                                                                                                                                                                                                                                                     |                                          |
| 12 |                               |     |                                                                                                                                                                                                                                                                                     |                                          |
| 13 | Declaration of interests      | 28  | Financial and other competing interests for principal investigators for the overall trial and each study site                                                                                                                                                                       | 17 (Competing interests)                 |
| 14 |                               |     |                                                                                                                                                                                                                                                                                     |                                          |
| 15 |                               |     |                                                                                                                                                                                                                                                                                     |                                          |
| 16 | Access to data                | 29  | Statement of who will have access to the final trial dataset, and disclosure of contractual agreements that limit such access for investigators                                                                                                                                     | 17 (Availability of data and materials)  |
| 17 |                               |     |                                                                                                                                                                                                                                                                                     |                                          |
| 18 |                               |     |                                                                                                                                                                                                                                                                                     |                                          |
| 19 | Ancillary and post-trial care | 30  | Provisions, if any, for ancillary and post-trial care, and for compensation to those who suffer harm from trial participation                                                                                                                                                       | N/A                                      |
| 20 |                               |     |                                                                                                                                                                                                                                                                                     |                                          |
| 21 |                               |     |                                                                                                                                                                                                                                                                                     |                                          |
| 22 | Dissemination policy          | 31a | Plans for investigators and sponsor to communicate trial results to participants, healthcare professionals, the public, and other relevant groups (eg, via publication, reporting in results databases, or other data sharing arrangements), including any publication restrictions | 15 (Dissemination policy)                |
| 23 |                               |     |                                                                                                                                                                                                                                                                                     |                                          |
| 24 |                               | 31b | Authorship eligibility guidelines and any intended use of professional writers                                                                                                                                                                                                      | 15 (Dissemination policy), N/A           |
| 25 |                               |     |                                                                                                                                                                                                                                                                                     |                                          |
| 26 |                               | 31c | Plans, if any, for granting public access to the full protocol, participant-level dataset, and statistical code                                                                                                                                                                     | N/A                                      |
| 27 |                               |     |                                                                                                                                                                                                                                                                                     |                                          |
| 28 |                               |     |                                                                                                                                                                                                                                                                                     |                                          |
| 29 |                               |     |                                                                                                                                                                                                                                                                                     |                                          |
| 30 |                               |     |                                                                                                                                                                                                                                                                                     |                                          |
| 31 |                               |     |                                                                                                                                                                                                                                                                                     |                                          |
| 32 |                               |     |                                                                                                                                                                                                                                                                                     |                                          |
| 33 |                               |     |                                                                                                                                                                                                                                                                                     |                                          |
| 34 | <b>Appendices</b>             |     |                                                                                                                                                                                                                                                                                     |                                          |
| 35 |                               |     |                                                                                                                                                                                                                                                                                     |                                          |
| 36 | Informed consent materials    | 32  | Model consent form and other related documentation given to participants and authorised surrogates                                                                                                                                                                                  | Annex 1 (in French)                      |
| 37 |                               |     |                                                                                                                                                                                                                                                                                     |                                          |
| 38 |                               |     |                                                                                                                                                                                                                                                                                     |                                          |
| 39 |                               |     |                                                                                                                                                                                                                                                                                     |                                          |
| 40 |                               |     |                                                                                                                                                                                                                                                                                     |                                          |
| 41 |                               |     |                                                                                                                                                                                                                                                                                     |                                          |
| 42 |                               |     |                                                                                                                                                                                                                                                                                     |                                          |
| 43 |                               |     |                                                                                                                                                                                                                                                                                     |                                          |
| 44 |                               |     |                                                                                                                                                                                                                                                                                     |                                          |
| 45 |                               |     |                                                                                                                                                                                                                                                                                     |                                          |
| 46 |                               |     |                                                                                                                                                                                                                                                                                     |                                          |

|    |                      |    |                                                                                      |
|----|----------------------|----|--------------------------------------------------------------------------------------|
| 1  |                      |    |                                                                                      |
| 2  |                      |    |                                                                                      |
| 3  |                      |    |                                                                                      |
| 4  | Biological specimens | 33 | Plans for collection, laboratory evaluation, and storage of biological specimens for |
| 5  |                      |    | genetic or molecular analysis in the current trial and for future use in ancillary   |
| 6  |                      |    | studies, if applicable                                                               |
| 7  |                      |    |                                                                                      |
| 8  |                      |    |                                                                                      |
| 9  |                      |    |                                                                                      |
| 10 |                      |    |                                                                                      |
| 11 |                      |    |                                                                                      |
| 12 |                      |    |                                                                                      |
| 13 |                      |    |                                                                                      |
| 14 |                      |    |                                                                                      |
| 15 |                      |    |                                                                                      |
| 16 |                      |    |                                                                                      |
| 17 |                      |    |                                                                                      |
| 18 |                      |    |                                                                                      |
| 19 |                      |    |                                                                                      |
| 20 |                      |    |                                                                                      |
| 21 |                      |    |                                                                                      |
| 22 |                      |    |                                                                                      |
| 23 |                      |    |                                                                                      |
| 24 |                      |    |                                                                                      |
| 25 |                      |    |                                                                                      |
| 26 |                      |    |                                                                                      |
| 27 |                      |    |                                                                                      |
| 28 |                      |    |                                                                                      |
| 29 |                      |    |                                                                                      |
| 30 |                      |    |                                                                                      |
| 31 |                      |    |                                                                                      |
| 32 |                      |    |                                                                                      |
| 33 |                      |    |                                                                                      |
| 34 |                      |    |                                                                                      |
| 35 |                      |    |                                                                                      |
| 36 |                      |    |                                                                                      |
| 37 |                      |    |                                                                                      |
| 38 |                      |    |                                                                                      |
| 39 |                      |    |                                                                                      |
| 40 |                      |    |                                                                                      |
| 41 |                      |    |                                                                                      |
| 42 |                      |    |                                                                                      |
| 43 |                      |    |                                                                                      |
| 44 |                      |    |                                                                                      |
| 45 |                      |    |                                                                                      |
| 46 |                      |    |                                                                                      |

---

\*It is strongly recommended that this checklist be read in conjunction with the SPIRIT 2013 Explanation & Elaboration for important clarification on the items. Amendments to the protocol should be tracked and dated. The SPIRIT checklist is copyrighted by the SPIRIT Group under the Creative Commons “[Attribution-NonCommercial-NoDerivs 3.0 Unported](#)” license.

For peer review only

**Supplementary table 2:** All items from the World Health Organization Trial Registration Data Set (SPIRIT item 2b)

| <b>Data category</b>                          | <b>Information</b>                                                                                                                                                                                                                                                                                                                                                                                                                                                                                                                                                                                                                                                                                                                                                                                                                                                                                                                                                                                                                                                                                           |
|-----------------------------------------------|--------------------------------------------------------------------------------------------------------------------------------------------------------------------------------------------------------------------------------------------------------------------------------------------------------------------------------------------------------------------------------------------------------------------------------------------------------------------------------------------------------------------------------------------------------------------------------------------------------------------------------------------------------------------------------------------------------------------------------------------------------------------------------------------------------------------------------------------------------------------------------------------------------------------------------------------------------------------------------------------------------------------------------------------------------------------------------------------------------------|
| Primary registry and trial identifying number | ClinicalTrials.gov<br>NCT03659123                                                                                                                                                                                                                                                                                                                                                                                                                                                                                                                                                                                                                                                                                                                                                                                                                                                                                                                                                                                                                                                                            |
| Date of registration in primary registry      | 6 September 2018                                                                                                                                                                                                                                                                                                                                                                                                                                                                                                                                                                                                                                                                                                                                                                                                                                                                                                                                                                                                                                                                                             |
| Secondary identifying numbers                 | 69HCL16_0701<br>ID RCB N° 2018-A001026-49                                                                                                                                                                                                                                                                                                                                                                                                                                                                                                                                                                                                                                                                                                                                                                                                                                                                                                                                                                                                                                                                    |
| Source(s) of monetary or material support     | Agence Régionale de Santé Auvergne Rhône Alpes                                                                                                                                                                                                                                                                                                                                                                                                                                                                                                                                                                                                                                                                                                                                                                                                                                                                                                                                                                                                                                                               |
| Primary sponsor                               | Hospices Civils de Lyon                                                                                                                                                                                                                                                                                                                                                                                                                                                                                                                                                                                                                                                                                                                                                                                                                                                                                                                                                                                                                                                                                      |
| Secondary sponsor(s)                          |                                                                                                                                                                                                                                                                                                                                                                                                                                                                                                                                                                                                                                                                                                                                                                                                                                                                                                                                                                                                                                                                                                              |
| Contact for public queries                    | David Dayde, +33.4.78.86.37.74, david.dayde@chu-lyon.fr                                                                                                                                                                                                                                                                                                                                                                                                                                                                                                                                                                                                                                                                                                                                                                                                                                                                                                                                                                                                                                                      |
| Contact for scientific queries                | Claire Falandry, +33.4.78.86.66.34, claire.falandry@chu-lyon.fr                                                                                                                                                                                                                                                                                                                                                                                                                                                                                                                                                                                                                                                                                                                                                                                                                                                                                                                                                                                                                                              |
| Public title                                  | Prehabilitation & Rehabilitation in Oncogeriatrics: Adaptation to Deconditioning Risk and Accompaniment of Patients' With Cancer                                                                                                                                                                                                                                                                                                                                                                                                                                                                                                                                                                                                                                                                                                                                                                                                                                                                                                                                                                             |
| Scientific title                              | Prehabilitation & Rehabilitation in Oncogeriatrics: Adaptation to Deconditioning Risk and Accompaniment of Patients' With Cancer, a Multicentre Pilot Study                                                                                                                                                                                                                                                                                                                                                                                                                                                                                                                                                                                                                                                                                                                                                                                                                                                                                                                                                  |
| Countries of recruitment                      | France                                                                                                                                                                                                                                                                                                                                                                                                                                                                                                                                                                                                                                                                                                                                                                                                                                                                                                                                                                                                                                                                                                       |
| Health condition(s) or problem(s) studied     | Old Injury                                                                                                                                                                                                                                                                                                                                                                                                                                                                                                                                                                                                                                                                                                                                                                                                                                                                                                                                                                                                                                                                                                   |
| Intervention(s)                               | <p>Behavioural: standardised geriatric intervention</p> <p>Nutritional care is based on:</p> <ul style="list-style-type: none"> <li>• A personalised evaluation of nutritional balance and nutritional needs of the patient</li> <li>• A weekly follow-up of weight and nutritional intake</li> </ul> <p>Total-body rehabilitation is based on:</p> <ul style="list-style-type: none"> <li>• 2 to 3 times a week: strength exercise</li> <li>• 2 to 3 times a week: endurance exercise, 20 to 45 min each sequence</li> <li>• 2 times a week: respiratory physiotherapy</li> </ul> <p>Pharmaceutical conciliation and optimisation according to the STOPP/START criteria During peri-operative time, the nurse contacts the surgical team for transmission of the patient's personal data, physical medication conciliation results During rehabilitation time and hospital-home transition time, the nurse contacts the rehabilitation team for transmission of the patient's personal data and care course, physical (nutritional, functional, and/or comorbidities), medication conciliation results.</p> |

| Data category                        | Information                                                                                                                                                                                                                                                                                                                                                                                                                                                                                                                                                                                                                                                                                                                                                                                                                                                                                                                                                                                                                                                                                                                  |
|--------------------------------------|------------------------------------------------------------------------------------------------------------------------------------------------------------------------------------------------------------------------------------------------------------------------------------------------------------------------------------------------------------------------------------------------------------------------------------------------------------------------------------------------------------------------------------------------------------------------------------------------------------------------------------------------------------------------------------------------------------------------------------------------------------------------------------------------------------------------------------------------------------------------------------------------------------------------------------------------------------------------------------------------------------------------------------------------------------------------------------------------------------------------------|
| Key inclusion and exclusion criteria | <p>Inclusion criteria:<br/>           Patient aged <math>\geq 70</math> years OR patient aged <math>\geq 60</math> years with significant comorbid condition (modified Charlson index <math>\geq 3</math>) or disability (ADL score <math>&lt; 6/6</math>);<br/>           Histologically or cytologically proven cancer.<br/>           Life expectancy <math>&gt; 3</math> months.<br/>           Written informed consent obtained<br/>           Covered by a Health System where applicable.</p> <p>Exclusion Criteria:<br/>           Other malignancy within the previous 5 years, except for adequately treated carcinoma <i>in situ</i> of the cervix or squamous carcinoma of the skin, or adequately controlled limited basal cell skin cancer.<br/>           Patient unable to be regularly followed for any reason (geographical, familial, social, psychological).<br/>           Any mental or physical handicap at risk of interfering with the appropriate treatment.<br/>           Any administrative or legal supervision where applicable</p>                                                          |
| Study type                           | Interventional<br>Allocation: N/A<br>Intervention model: Single Group Assignment<br>Masking: None (Open Label)<br>Primary purpose: Health Services Research<br>Phase II                                                                                                                                                                                                                                                                                                                                                                                                                                                                                                                                                                                                                                                                                                                                                                                                                                                                                                                                                      |
| Date of first enrolment              | 3 July 2018                                                                                                                                                                                                                                                                                                                                                                                                                                                                                                                                                                                                                                                                                                                                                                                                                                                                                                                                                                                                                                                                                                                  |
| Target sample size                   | 122                                                                                                                                                                                                                                                                                                                                                                                                                                                                                                                                                                                                                                                                                                                                                                                                                                                                                                                                                                                                                                                                                                                          |
| Recruitment status                   | Recruiting                                                                                                                                                                                                                                                                                                                                                                                                                                                                                                                                                                                                                                                                                                                                                                                                                                                                                                                                                                                                                                                                                                                   |
| Primary outcome(s)                   | <p>Implementation of at least one item of PROADAPT standardised geriatric intervention of the PROADAPT programme pilot study [Time Frame: 12 months]:</p> <ul style="list-style-type: none"> <li>• Preoperative physical activity including strength and endurance exercise assessed by physical exercises accomplished under the supervision of a physiotherapist. Number of patients with at least 1 intervention achieved in the domain.</li> <li>• Nutrition guidelines before and after physical activity assessed by questionnaires. Number of patients with at least 1 intervention achieved in the domain.</li> <li>• Patient education and coaching assessed by questionnaires and visits. Number of patients with at least 1 intervention achieved in the domain</li> <li>• Achievement of standardized intervention procedures, according to the checklist established in consensus with surgeons. Number of patients with at least 1 intervention achieved in the domain</li> <li>• Rehabilitation assessed by questionnaires. Number of patients with at least 1 intervention achieved in the domain</li> </ul> |

| Data category          | Information                                                                                                                                                                                                                                                                                                                                                                                                                                                                                                                                                                                                                                                                   |
|------------------------|-------------------------------------------------------------------------------------------------------------------------------------------------------------------------------------------------------------------------------------------------------------------------------------------------------------------------------------------------------------------------------------------------------------------------------------------------------------------------------------------------------------------------------------------------------------------------------------------------------------------------------------------------------------------------------|
|                        | <ul style="list-style-type: none"> <li>• Accomplishment of pharmaceutical medication conciliation and treatment optimisation. Number of patients with at least 1 intervention achieved in the domain</li> <li>• Bridging interventions for hospital-to-home transition. Number of patients with at least 1 intervention achieved in the domain</li> </ul>                                                                                                                                                                                                                                                                                                                     |
| Key secondary outcomes | <ul style="list-style-type: none"> <li>• Post-operative morbidity [Time Frame: 30 and 90 days] according to the Clavien-Dindo classification</li> <li>• Post-operative morbidity [Time Frame: 90 days] according to NCI CTC v4.4</li> <li>• Therapeutic strategy [Time Frame: 12 months]: Treatment plan completion rate: Number of patients for whom the treatment plan was completed.</li> <li>• Progression-free survival [Time Frame: 12 months]</li> <li>• Post-treatment complication [Time Frame: 12 months]: Post-treatment complication grade <math>\geq 3</math> according the National Cancer Institute Common Toxicity Criteria version 4 (NCI-CTC-v4)</li> </ul> |

For peer review only
