# Supplementary material for: Feasibility of a prehabilitation programme dedicated to older patients with cancer before complex medical–surgical procedures: the PROADAPT pilot study protocol
Source: PubMed Central journal article supplement — BMJ Open. 2021 Apr 2;11(4):e042960. doi: 10.1136/bmjopen-2020-042960 (PMC8023742; doi:10.1136/bmjopen-2020-042960), 2021-04-02
Supplement: bmjopen-2020-042960supp001.pdf [file bmjopen-2020-042960supp001.pdf]

## Supplementary file 1: Patient satisfaction assessment of the PROADAPT programme

|                                                                                                                                                                          |                                                     |
|--------------------------------------------------------------------------------------------------------------------------------------------------------------------------|-----------------------------------------------------|
| <br>Hospices Civils de Lyon<br>Direction de la Recherche Clinique<br>et de l'Innovation | <b>PATIENT ASSESSMENT OF THE PROADAPT PROGRAMME</b> |
|--------------------------------------------------------------------------------------------------------------------------------------------------------------------------|-----------------------------------------------------|

Dear Sir or Madam,

You have been part of the PROADAPT - pilot study and we thank you for your involvement. In order to assess and improve this study, we would like to collect your opinion. This opinion is anonymous and does not affect your healthcare.

**The following questions are concerning the patient booklet that was given to you as part of the study**

If you consider the booklet overall

- |                                                 |                                     |                                   |                                     |
|-------------------------------------------------|-------------------------------------|-----------------------------------|-------------------------------------|
| • Did the explanations seem appropriate to you? | Not at all <input type="checkbox"/> | A little <input type="checkbox"/> | Absolutely <input type="checkbox"/> |
| • Did the information seem clear to you?        | Not at all <input type="checkbox"/> | A little <input type="checkbox"/> | Absolutely <input type="checkbox"/> |
| • Did the pages seem readable enough?           | Not at all <input type="checkbox"/> | A little <input type="checkbox"/> | Absolutely <input type="checkbox"/> |
| • Did the illustrations seem clear to you?      | Not at all <input type="checkbox"/> | A little <input type="checkbox"/> | Absolutely <input type="checkbox"/> |

How would you rate the booklet?

(useless = 0 ; very useful = 10)

0 1 2 3 4 5 6 7 8 9 10

**The following questions are concerning the overall PROADAPT programme (breathing and physical exercises, booklet, calls, and follow-up visits)**

Did you have difficulty in understanding the explanations given by the medical staff

- |                                                                                   |                                     |                                   |                                |
|-----------------------------------------------------------------------------------|-------------------------------------|-----------------------------------|--------------------------------|
| • for breathing exercises?                                                        | Not at all <input type="checkbox"/> | A little <input type="checkbox"/> | A lot <input type="checkbox"/> |
| • for physical exercises?                                                         | Not at all <input type="checkbox"/> | A little <input type="checkbox"/> | A lot <input type="checkbox"/> |
| • for nutritional advices?                                                        | Not at all <input type="checkbox"/> | A little <input type="checkbox"/> | A lot <input type="checkbox"/> |
| • during the assessment with the physician of the different drugs you are taking? | Not at all <input type="checkbox"/> | A little <input type="checkbox"/> | A lot <input type="checkbox"/> |

Did you encounter any difficulties

- for the realisation of breathing exercises ? Not at all  A little  A lot
- for the realisation of physical exercises ? Not at all  A little  A lot
- for the application of nutritional advice? Not at all  A little  A lot
- for the recording of activities? Not at all  A little  A lot

How do you estimate nursing phone calls

- at the beginning of your healthcare before your surgery / radiotherapy Useless  Of little importance  Needed
- after your surgery / radiotherapy Useless  Of little importance  Needed

Would you have liked to have more information? No  Yes

If yes, on which aspect

.....  
 .....  
 .....

What would you propose to make the programme more suitable for patients?

.....  
 .....  
 .....  
 .....

Thank you for your time, we will use your opinions to improve the PROADAPT programme and the patient booklet.

Prof Claire Falandry, study coordinator
