# Supplementary material for: Feasibility of a prehabilitation programme dedicated to older patients with cancer before complex medical–surgical procedures: the PROADAPT pilot study protocol
Source: PubMed Central journal article supplement — BMJ Open. 2021 Apr 2;11(4):e042960. doi: 10.1136/bmjopen-2020-042960 (PMC8023742; doi:10.1136/bmjopen-2020-042960), 2021-04-02
Supplement: bmjopen-2020-042960supp003.pdf [file bmjopen-2020-042960supp003.pdf]

**Supplementary table 2: All items from the World Health Organization Trial Registration Data Set (SPIRIT item 2b)**

| <b>Data category</b>                          | <b>Information</b>                                                                                                                                                                                                                                                                                                                                                                                                                                                                                                                                                                                                                                                                                                                                                                                                                                                                                                                                                                                                                                                                                        |
|-----------------------------------------------|-----------------------------------------------------------------------------------------------------------------------------------------------------------------------------------------------------------------------------------------------------------------------------------------------------------------------------------------------------------------------------------------------------------------------------------------------------------------------------------------------------------------------------------------------------------------------------------------------------------------------------------------------------------------------------------------------------------------------------------------------------------------------------------------------------------------------------------------------------------------------------------------------------------------------------------------------------------------------------------------------------------------------------------------------------------------------------------------------------------|
| Primary registry and trial identifying number | ClinicalTrials.gov<br>NCT03659123                                                                                                                                                                                                                                                                                                                                                                                                                                                                                                                                                                                                                                                                                                                                                                                                                                                                                                                                                                                                                                                                         |
| Date of registration in primary registry      | 6 September 2018                                                                                                                                                                                                                                                                                                                                                                                                                                                                                                                                                                                                                                                                                                                                                                                                                                                                                                                                                                                                                                                                                          |
| Secondary identifying numbers                 | 69HCL16_0701<br>ID RCB N° 2018-A001026-49                                                                                                                                                                                                                                                                                                                                                                                                                                                                                                                                                                                                                                                                                                                                                                                                                                                                                                                                                                                                                                                                 |
| Source(s) of monetary or material support     | Agence Régionale de Santé Auvergne Rhône Alpes                                                                                                                                                                                                                                                                                                                                                                                                                                                                                                                                                                                                                                                                                                                                                                                                                                                                                                                                                                                                                                                            |
| Primary sponsor                               | Hospices Civils de Lyon                                                                                                                                                                                                                                                                                                                                                                                                                                                                                                                                                                                                                                                                                                                                                                                                                                                                                                                                                                                                                                                                                   |
| Secondary sponsor(s)                          |                                                                                                                                                                                                                                                                                                                                                                                                                                                                                                                                                                                                                                                                                                                                                                                                                                                                                                                                                                                                                                                                                                           |
| Contact for public queries                    | David Dayde, +33.4.78.86.37.74, david.dayde@chu-lyon.fr                                                                                                                                                                                                                                                                                                                                                                                                                                                                                                                                                                                                                                                                                                                                                                                                                                                                                                                                                                                                                                                   |
| Contact for scientific queries                | Claire Falandry, +33.4.78.86.66.34, claire.falandry@chu-lyon.fr                                                                                                                                                                                                                                                                                                                                                                                                                                                                                                                                                                                                                                                                                                                                                                                                                                                                                                                                                                                                                                           |
| Public title                                  | Prehabilitation & Rehabilitation in Oncogeriatrics: Adaptation to Deconditioning Risk and Accompaniment of Patients' With Cancer                                                                                                                                                                                                                                                                                                                                                                                                                                                                                                                                                                                                                                                                                                                                                                                                                                                                                                                                                                          |
| Scientific title                              | Prehabilitation & Rehabilitation in Oncogeriatrics: Adaptation to Deconditioning Risk and Accompaniment of Patients' With Cancer, a Multicentre Pilot Study                                                                                                                                                                                                                                                                                                                                                                                                                                                                                                                                                                                                                                                                                                                                                                                                                                                                                                                                               |
| Countries of recruitment                      | France                                                                                                                                                                                                                                                                                                                                                                                                                                                                                                                                                                                                                                                                                                                                                                                                                                                                                                                                                                                                                                                                                                    |
| Health condition(s) or problem(s) studied     | Old Injury                                                                                                                                                                                                                                                                                                                                                                                                                                                                                                                                                                                                                                                                                                                                                                                                                                                                                                                                                                                                                                                                                                |
| Intervention(s)                               | <p>Behavioural: standardised geriatric intervention<br/>Nutritional care is based on:</p> <ul style="list-style-type: none"> <li>• A personalised evaluation of nutritional balance and nutritional needs of the patient</li> <li>• A weekly follow-up of weight and nutritional intake</li> </ul> <p>Total-body rehabilitation is based on:</p> <ul style="list-style-type: none"> <li>• 2 to 3 times a week: strength exercise</li> <li>• 2 to 3 times a week: endurance exercise, 20 to 45 min each sequence</li> <li>• 2 times a week: respiratory physiotherapy</li> </ul> <p>Pharmaceutical conciliation and optimisation according to the STOPP/START criteria During peri-operative time, the nurse contacts the surgical team for transmission of the patient's personal data, physical medication conciliation results During rehabilitation time and hospital-home transition time, the nurse contacts the rehabilitation team for transmission of the patient's personal data and care course, physical (nutritional, functional, and/or comorbidities), medication conciliation results.</p> |

| Data category                        | Information                                                                                                                                                                                                                                                                                                                                                                                                                                                                                                                                                                                                                                                                                                                                                                                                                                                                                                                                                                                                                                                                                                           |
|--------------------------------------|-----------------------------------------------------------------------------------------------------------------------------------------------------------------------------------------------------------------------------------------------------------------------------------------------------------------------------------------------------------------------------------------------------------------------------------------------------------------------------------------------------------------------------------------------------------------------------------------------------------------------------------------------------------------------------------------------------------------------------------------------------------------------------------------------------------------------------------------------------------------------------------------------------------------------------------------------------------------------------------------------------------------------------------------------------------------------------------------------------------------------|
| Key inclusion and exclusion criteria | <p>Inclusion criteria:<br/>           Patient aged <math>\geq 70</math> years OR patient aged <math>\geq 60</math> years with significant comorbid condition (modified Charlson index <math>\geq 3</math>) or disability (ADL score <math>&lt; 6/6</math>);<br/>           Histologically or cytologically proven cancer.<br/>           Life expectancy <math>&gt; 3</math> months.<br/>           Written informed consent obtained<br/>           Covered by a Health System where applicable.</p> <p>Exclusion Criteria:<br/>           Other malignancy within the previous 5 years, except for adequately treated carcinoma <i>in situ</i> of the cervix or squamous carcinoma of the skin, or adequately controlled limited basal cell skin cancer.<br/>           Patient unable to be regularly followed for any reason (geographical, familial, social, psychological).<br/>           Any mental or physical handicap at risk of interfering with the appropriate treatment.<br/>           Any administrative or legal supervision where applicable</p>                                                   |
| Study type                           | Interventional<br>Allocation: N/A<br>Intervention model: Single Group Assignment<br>Masking: None (Open Label)<br>Primary purpose: Health Services Research<br>Phase II                                                                                                                                                                                                                                                                                                                                                                                                                                                                                                                                                                                                                                                                                                                                                                                                                                                                                                                                               |
| Date of first enrolment              | 3 July 2018                                                                                                                                                                                                                                                                                                                                                                                                                                                                                                                                                                                                                                                                                                                                                                                                                                                                                                                                                                                                                                                                                                           |
| Target sample size                   | 122                                                                                                                                                                                                                                                                                                                                                                                                                                                                                                                                                                                                                                                                                                                                                                                                                                                                                                                                                                                                                                                                                                                   |
| Recruitment status                   | Recruiting                                                                                                                                                                                                                                                                                                                                                                                                                                                                                                                                                                                                                                                                                                                                                                                                                                                                                                                                                                                                                                                                                                            |
| Primary outcome(s)                   | Implementation of at least one item of PROADAPT standardised geriatric intervention of the PROADAPT programme pilot study [Time Frame: 12 months]: <ul style="list-style-type: none"> <li>• Preoperative physical activity including strength and endurance exercise assessed by physical exercises accomplished under the supervision of a physiotherapist. Number of patients with at least 1 intervention achieved in the domain.</li> <li>• Nutrition guidelines before and after physical activity assessed by questionnaires. Number of patients with at least 1 intervention achieved in the domain.</li> <li>• Patient education and coaching assessed by questionnaires and visits. Number of patients with at least 1 intervention achieved in the domain</li> <li>• Achievement of standardized intervention procedures, according to the checklist established in consensus with surgeons. Number of patients with at least 1 intervention achieved in the domain</li> <li>• Rehabilitation assessed by questionnaires. Number of patients with at least 1 intervention achieved in the domain</li> </ul> |

| Data category          | Information                                                                                                                                                                                                                                                                                                                                                                                                                                                                                                                                                                                                                                                             |
|------------------------|-------------------------------------------------------------------------------------------------------------------------------------------------------------------------------------------------------------------------------------------------------------------------------------------------------------------------------------------------------------------------------------------------------------------------------------------------------------------------------------------------------------------------------------------------------------------------------------------------------------------------------------------------------------------------|
|                        | <ul style="list-style-type: none"><li>• Accomplishment of pharmaceutical medication conciliation and treatment optimisation. Number of patients with at least 1 intervention achieved in the domain</li><li>• Bridging interventions for hospital-to-home transition. Number of patients with at least 1 intervention achieved in the domain</li></ul>                                                                                                                                                                                                                                                                                                                  |
| Key secondary outcomes | <ul style="list-style-type: none"><li>• Post-operative morbidity [Time Frame: 30 and 90 days] according to the Clavien-Dindo classification</li><li>• Post-operative morbidity [Time Frame: 90 days] according to NCI CTC v4.4</li><li>• Therapeutic strategy [Time Frame: 12 months]: Treatment plan completion rate: Number of patients for whom the treatment plan was completed.</li><li>• Progression-free survival [Time Frame: 12 months]</li><li>• Post-treatment complication [Time Frame: 12 months]: Post-treatment complication grade <math>\geq 3</math> according the National Cancer Institute Common Toxicity Criteria version 4 (NCI-CTC-v4)</li></ul> |
